# Supplementary material for: Spatial Adaptive Responses of Highly Threatened European Mammal Species under Climate Change
Source: Preprints.org preprint supplement (doi:10.20944/preprints202111.0550.v1), 2021-11-29
Supplement: Supplementary file 1 [file supplementary]

# Spatial adaptive responses of highly threatened European mammal species under climate change

## APPENDIX I

### Tables

|                                                                                                                                                                                                                    |            |
|--------------------------------------------------------------------------------------------------------------------------------------------------------------------------------------------------------------------|------------|
| <b>S1:</b> Species threat statuses and listings                                                                                                                                                                    | <b>1</b>   |
| <b>S2:</b> summary data of climate suitability modelling and suitability trend inside EU28 conservation areas                                                                                                      | <b>2</b>   |
| <b>S3:</b> Species dispersal rates                                                                                                                                                                                 | <b>3</b>   |
| <b>S4:</b> Summary of statistical tests comparing the effects of spatial attribute coverage with the occurrence of SAT convergence points. Analyses refer to each time period, RCP and dispersal scenario assessed | <b>4-7</b> |
| <b>S5:</b> Summary of relationships between the frequency each site emerge as part of a SAT (among the RCP and dispersal scenarios tested) and spatial attributes, persistence scores and convergence levels       | <b>8</b>   |

**Table S1** – A list of all species in Habitats Directive annex IV, the justification for their inclusion/ exclusion in analysis, plus the species that were added to the analysis (either in annex II and V) because of their current decreasing abundance trends (as in IUCN Red List). Gray lines signalize the analyzed species.

| Taxonomic group                                                  | Annex | Inclusion/ Exclusion (justification, except inclusion/Annex IV) |
|------------------------------------------------------------------|-------|-----------------------------------------------------------------|
| <b><u>INSECTIVORA</u></b>                                        |       |                                                                 |
| <b><u>Erinaceidae</u></b>                                        |       |                                                                 |
| <i>Erinaceus algirus</i>                                         | IV    | yes                                                             |
| <b><u>Soricidae</u></b>                                          |       |                                                                 |
| <i>Crocidura canariensis</i>                                     | IV    | no (less than 20 records)                                       |
| <i>Crocidura sicula</i>                                          | IV    | no (less than 20 records)                                       |
| <b><u>Talpidae</u></b>                                           |       |                                                                 |
| <i>Galemys pyrenaicus</i>                                        | IV    | yes                                                             |
| <b><u>MICROCHIROPTERA</u></b>                                    |       |                                                                 |
| All species                                                      | IV    | no (very specialized species)                                   |
| <b><u>MEGACHIROPTERA</u></b>                                     |       |                                                                 |
| <b><u>Pteropodidae</u></b>                                       |       |                                                                 |
| <i>Rousettus aegyptiacus</i>                                     | IV    | no (very specialized species)                                   |
| <b><u>RODENTIA</u></b>                                           |       |                                                                 |
| <b><u>Gliridae</u></b>                                           |       |                                                                 |
| All species except <i>Glis glis</i> and <i>Eliomys quercinus</i> | IV    | only <i>Dryomys nitedula</i> , <i>Muscardinus avellanarius</i>  |
| <b><u>Sciuridae</u></b>                                          |       |                                                                 |
| <i>Marmota marmota latirostris</i>                               | IV    | no (less than 20 records)                                       |
| <i>Pteromys volans</i>                                           | IV    | yes                                                             |
| <i>Spermophilus citellus</i>                                     | IV    | yes                                                             |
| <i>Spermophilus suslicus</i>                                     | IV    | no (less than 20 records)                                       |
| <i>Sciurus anomalus</i>                                          | IV    | no (less than 20 records)                                       |
| <b><u>Castoridae</u></b>                                         |       |                                                                 |
| <i>Castor fiber</i>                                              | IV    | yes                                                             |
| <b><u>Cricetidae</u></b>                                         |       |                                                                 |
| <i>Cricetus cricetus</i>                                         | IV    | yes                                                             |
| <i>Mesocricetus newtoni</i>                                      | IV    | no (less than 20 records)                                       |
| <b><u>Microtidae</u></b>                                         |       |                                                                 |
| <i>Dinaromys bogdanovi</i>                                       | IV    | no (less than 20 records)                                       |
| <i>Microtus cabreræ</i>                                          | IV    | yes                                                             |
| <i>Microtus oeconomus arenicola</i>                              | IV    | no (less than 20 records)                                       |
| <i>Microtus oeconomus mehelyi</i>                                | IV    | no (less than 20 records)                                       |
| <i>Microtus tatricus</i>                                         | IV    | no (less than 20 records)                                       |
| <b><u>Zapodidae</u></b>                                          |       |                                                                 |
| <i>Sicista betulina</i>                                          | IV    | yes                                                             |
| <i>Sicista subtilis</i>                                          | IV    | no (less than 20 records)                                       |
| <b><u>Hystriidae</u></b>                                         |       |                                                                 |
| <i>Hystrix cristata</i>                                          | IV    | yes                                                             |
| <b><u>CARNIVORA</u></b>                                          |       |                                                                 |
| <b><u>Canidae</u></b>                                            |       |                                                                 |
| <i>Alopex lagopus</i>                                            | IV    | yes                                                             |
| <i>Canis aureus</i>                                              | V     | yes (decreasing population trends, IUCN Red list)               |
| <i>Canis lupus</i>                                               | IV    | yes                                                             |
| <b><u>Ursidae</u></b>                                            |       |                                                                 |
| <i>Ursus arctos</i>                                              | IV    | yes                                                             |

| Taxonomic group                      | Annex | Inclusion/ Exclusion (justification, except inclusion/Annex IV) |
|--------------------------------------|-------|-----------------------------------------------------------------|
| <b><u>Mustelidae</u></b>             |       |                                                                 |
| <i>Gulo gulo</i>                     | II    | yes (priority species)                                          |
| <i>Lutra lutra</i>                   | IV    | yes                                                             |
| <i>Martes martes</i>                 | V     | yes                                                             |
| <i>Mustela eversmanii</i>            | IV    | no (possible sampling biases)                                   |
| <i>Mustela lutreola</i>              | IV    | yes                                                             |
| <i>Mustela putorius</i>              | V     | yes (decreasing population trends, IUCN Red list)               |
| <i>Vormela peregusna</i>             | IV    | no (possible sampling biases)                                   |
| <b><u>Viverridae</u></b>             |       |                                                                 |
| <i>Genneta genneta</i>               | V     | yes (decreasing population trends, IUCN Red list)               |
| <i>Hespestes ichneumon</i>           | V     | yes (decreasing population trends, IUCN Red list)               |
| <b><u>Felidae</u></b>                |       |                                                                 |
| <i>Felis silvestris</i>              | IV    | yes                                                             |
| <i>Lynx lynx</i>                     | IV    | yes                                                             |
| <i>Lynx pardinus</i>                 | IV    | yes                                                             |
| <b><u>Phocidae</u></b>               |       |                                                                 |
| <i>Monachus monachus</i>             | IV    | no (marine species)                                             |
| <i>Phoca hispida saimensis</i>       | IV    | no (marine species)                                             |
| <b><u>DUPLICIDENTATA</u></b>         |       |                                                                 |
| <i>Lepus timidus</i>                 | V     | yes (decreasing population trends, IUCN Red list)               |
| <b><u>ARTIODACTYLA</u></b>           |       |                                                                 |
| <b><u>Cervidae</u></b>               |       |                                                                 |
| <i>Cervus elaphus corsicanus</i>     | IV    | no (less than 20 records)                                       |
| <b><u>Bovidae</u></b>                |       |                                                                 |
| <i>Bison bonasus</i>                 | IV    | no (less than 20 records)                                       |
| <i>Capra aegagrus</i>                | IV    | no (less than 20 records)                                       |
| <i>Capra ibex</i>                    | V     | yes (decreasing population trends, IUCN Red list)               |
| <i>Capra pyrenaica pyrenaica</i>     | IV    | yes                                                             |
| <i>Ovis ammon</i>                    | IV    | yes                                                             |
| <i>Ovis orientalis ophion</i>        | IV    | no (less than 20 records)                                       |
| <i>Rupicapra pyrenaica ornata</i>    | IV    | yes                                                             |
| <i>Rupicapra rupicapra balcanica</i> | IV    | yes (indistinct from <i>R. rupicapra tatrica</i> )              |
| <i>Rupicapra rupicapra tatrica</i>   | IV    | yes (indistinct from <i>R. rupicapra balcanica</i> )            |

**Table S2** – Summary data on species distribution model accuracy (TSS values) obtained by running seven distinct models and projected trends of suitable climate until 2080 in Europe evaluated in a previous study (Araújo et al, 2011) for Natura 2000 sites (N2k), nationally designed protected areas (PAs) and the remaining areas (out) under three RCP projections for future climates (W: for winner species; L: for loser species). Range size is the number of 50km x 50km sites where each species was recorded; Prevalence is the fraction of sites in the whole study region (Europe) where each species was recorded.

| Species               | Range size | Prevalence | TSS* |      |      |      |      |      |      |          | Climate trend (N2k/PAs/out) |         |         |
|-----------------------|------------|------------|------|------|------|------|------|------|------|----------|-----------------------------|---------|---------|
|                       |            |            | ANN  | BRT  | CTA  | FDA  | GAM  | GLM  | SRE  | Ensemble | RCP 8.5                     | RCP 6.0 | RCP 4.5 |
| <i>A lagopus</i>      | 149        | 0.07       | 0.86 | 0.90 | 0.93 | 0.67 | 0.93 | 0.95 | 0.59 | 0.87     | L/L/L                       | L/L/L   | L/L/L   |
| <i>A alpinus</i>      | 33         | 0.01       | 0.82 | 0.88 | 0.84 | 0.57 | 0.85 | 0.87 | 0.51 | 0.78     | L/L/L                       | L/L/L   | L/L/L   |
| <i>C aureus</i>       | 139        | 0.06       | 0.73 | 0.79 | 0.78 | 0.58 | 0.71 | 0.75 | 0.60 | 0.70     | W/W/W                       | W/W/W   | W/W/W   |
| <i>C lupus</i>        | 653        | 0.29       | 0.72 | 0.77 | 0.74 | 0.60 | 0.75 | 0.67 | 0.61 | 0.71     | L/L/L                       | L/L/L   | L/L/L   |
| <i>C ibex</i>         | 58         | 0.03       | 0.87 | 0.86 | 0.74 | 0.65 | 0.82 | 0.87 | 0.65 | 0.88     | L/L/L                       | L/L/L   | L/L/L   |
| <i>C pyrenaica</i>    | 43         | 0.02       | 0.84 | 0.83 | 0.81 | 0.58 | 0.80 | 0.74 | 0.57 | 0.75     | L/L/L                       | L/L/L   | L/L/L   |
| <i>C fiber</i>        | 479        | 0.21       | 0.66 | 0.68 | 0.56 | 0.52 | 0.58 | 0.54 | 0.53 | 0.41     | L/L/L                       | L/L/L   | L/L/L   |
| <i>C cricetus</i>     | 252        | 0.11       | 0.76 | 0.70 | 0.68 | 0.52 | 0.71 | 0.76 | 0.57 | 0.69     | L/L/L                       | L/L/L   | L/L/L   |
| <i>D nitedula</i>     | 181        | 0.08       | 0.82 | 0.85 | 0.88 | 0.53 | 0.74 | 0.74 | 0.52 | 0.74     | L/L/L                       | L/L/L   | L/L/L   |
| <i>F silvestris</i>   | 626        | 0.27       | 0.77 | 0.77 | 0.75 | 0.63 | 0.72 | 0.70 | 0.68 | 0.75     | L/W/L                       | L/W/L   | L/W/L   |
| <i>G pyrenaicus</i>   | 73         | 0.03       | 0.86 | 0.88 | 0.75 | 0.57 | 0.84 | 0.80 | 0.52 | 0.75     | L/L/L                       | L/L/L   | L/L/L   |
| <i>G genneta</i>      | 281        | 0.12       | 0.72 | 0.75 | 0.70 | 0.58 | 0.67 | 0.69 | 0.55 | 0.60     | L/L/L                       | L/L/L   | L/L/L   |
| <i>G gulo</i>         | 159        | 0.07       | 0.90 | 0.92 | 0.89 | 0.64 | 0.84 | 0.86 | 0.67 | 0.82     | L/L/L                       | L/L/L   | L/L/L   |
| <i>H ichneumon</i>    | 63         | 0.03       | 0.87 | 0.90 | 0.87 | 0.60 | 0.91 | 0.92 | 0.64 | 0.87     | L/L/L                       | L/L/L   | L/L/L   |
| <i>H cristata</i>     | 78         | 0.03       | 0.81 | 0.83 | 0.80 | 0.61 | 0.75 | 0.79 | 0.57 | 0.76     | W/W/W                       | W/W/W   | W/W/W   |
| <i>L timidus</i>      | 729        | 0.32       | 0.72 | 0.70 | 0.67 | 0.55 | 0.68 | 0.63 | 0.54 | 0.60     | L/L/L                       | L/L/L   | L/L/L   |
| <i>L lutra</i>        | 1372       | 0.60       | 0.69 | 0.71 | 0.58 | 0.53 | 0.71 | 0.72 | 0.52 | 0.68     | L/L/L                       | L/L/L   | L/L/L   |
| <i>L lynx</i>         | 612        | 0.27       | 0.69 | 0.70 | 0.69 | 0.51 | 0.60 | 0.57 | 0.58 | 0.64     | L/L/L                       | L/L/L   | L/L/L   |
| <i>L pardinus</i>     | 58         | 0.03       | 0.92 | 0.92 | 0.88 | 0.69 | 0.79 | 0.80 | 0.64 | 0.87     | L/L/L                       | L/L/L   | L/L/L   |
| <i>M martes</i>       | 1436       | 0.63       | 0.67 | 0.68 | 0.57 | 0.58 | 0.66 | 0.60 | 0.57 | 0.65     | L/L/L                       | L/L/L   | L/L/L   |
| <i>M cabrae</i>       | 58         | 0.03       | 0.93 | 0.93 | 0.78 | 0.68 | 0.84 | 0.89 | 0.67 | 0.79     | L/L/L                       | L/L/L   | L/L/L   |
| <i>M avellanarius</i> | 780        | 0.34       | 0.74 | 0.73 | 0.60 | 0.52 | 0.64 | 0.68 | 0.50 | 0.62     | L/L/L                       | L/L/L   | W/L/L   |
| <i>M lutreola</i>     | 46         | 0.02       | 0.94 | 0.96 | 0.94 | 0.69 | 0.97 | 0.89 | 0.60 | 0.90     | L/L/L                       | L/L/L   | L/L/L   |
| <i>M putorius</i>     | 1295       | 0.57       | 0.72 | 0.66 | 0.52 | 0.51 | 0.63 | 0.62 | 0.52 | 0.71     | W/W/W                       | W/W/W   | W/W/W   |
| <i>O ammon</i>        | 337        | 0.15       | 0.83 | 0.88 | 0.82 | 0.60 | 0.80 | 0.69 | 0.51 | 0.77     | L/L/L                       | L/L/L   | L/L/L   |
| <i>P volans</i>       | 102        | 0.04       | 0.85 | 0.86 | 0.79 | 0.66 | 0.74 | 0.78 | 0.54 | 0.73     | L/L/L                       | L/L/L   | L/L/L   |
| <i>R rupicapra</i>    | 200        | 0.09       | 0.72 | 0.80 | 0.63 | 0.62 | 0.72 | 0.69 | 0.57 | 0.68     | L/L/L                       | L/L/L   | L/L/L   |
| <i>S betulina</i>     | 200        | 0.09       | 0.85 | 0.88 | 0.86 | 0.59 | 0.76 | 0.78 | 0.50 | 0.72     | L/L/L                       | L/L/L   | L/L/L   |
| <i>S citellus</i>     | 179        | 0.08       | 0.80 | 0.86 | 0.81 | 0.64 | 0.79 | 0.78 | 0.64 | 0.73     | W/W/W                       | W/W/W   | L/W/W   |
| <i>U arctos</i>       | 489        | 0.21       | 0.66 | 0.65 | 0.57 | 0.55 | 0.58 | 0.52 | 0.40 | 0.61     | L/L/L                       | L/L/L   | L/L/L   |

\* ANN: Artificial Neural Networks; BRT: Boosted Regression Trees; CTA: Classification Tree Analysis; FDA: Flexible Discriminant Analysis; GAM: Generalized Additive Models; GLM: Generalized Linear Models; SER: Surface Range Envelope; Ensemble: after model calibration and evaluation.

**Table S3** – The species analyzed and predicted dispersal rates based on Schloss et al 2012. Whenever data on dispersal rate (km/yr) of a particular species were not found, an approximated value was obtained by averaging dispersal rates of taxonomically-similar species with body-size on the same order of magnitude. *D*max defines a 30 yrs dispersal ability, directly obtained from Schloss et al (2012); *D'*max corresponds to a more optimistic dispersal aptitude of species, so to mimic possible, less-frequent, extreme cases of dispersal (50% larger dispersal than D1).

| Species                         | Coding     | Dispersal rate (km/yr) | Justification                                              | <i>D</i> max (km)<br>Disp rate.30 | <i>D'</i> max (km)<br>1.5. <i>D</i> max |
|---------------------------------|------------|------------------------|------------------------------------------------------------|-----------------------------------|-----------------------------------------|
| <i>Alopex lagopus</i>           | <i>Ala</i> | 21.48                  | <i>Alopex lagopus</i>                                      | 644.4                             | 966.6                                   |
| <i>Atelerix algirus</i>         | <i>Aal</i> | 0.05                   | mean of Soricidae                                          | 1.5                               | 2.25                                    |
| <i>Canis aureus</i>             | <i>Cau</i> | 43.4                   | mean of <i>Canis</i> , sp                                  | 1302.0                            | 1953.0                                  |
| <i>Canis lupus</i>              | <i>Clu</i> | 43.4                   | mean of <i>Canis</i> , sp                                  | 1302.0                            | 1953.0                                  |
| <i>Capra ibex</i>               | <i>Cib</i> | 14.66                  | <i>Ovis canadensis</i>                                     | 439.8                             | 659.7                                   |
| <i>Capra pyrenaica</i>          | <i>Cpy</i> | 14.66                  | <i>Ovis canadensis</i>                                     | 439.8                             | 659.7                                   |
| <i>Castor fiber</i>             | <i>Cfi</i> | 2.90                   | <i>Castor canadensis</i>                                   | 87.0                              | 130.5                                   |
| <i>Cricetus cricetus</i>        | <i>Ccr</i> | 1.30                   | mean of Muridae                                            | 39.0                              | 58.5                                    |
| <i>Dryomys nitedula</i>         | <i>Dni</i> | 1.00                   | mean of Sciuridae, except <i>Marmota</i> because of weight | 30.0                              | 45.0                                    |
| <i>Felis silvestris</i>         | <i>Fsi</i> | 8.89                   | mean of <i>Oricefelis</i>                                  | 266.7                             | 400.1                                   |
| <i>Galemys pyrenaicus</i>       | <i>Gpy</i> | 0.46                   | mean of Talpidae                                           | 13.8                              | 20.7                                    |
| <i>Genneta genneta</i>          | <i>Gge</i> | 8.89                   | mean of <i>Oricefelis</i> , sp                             | 266.7                             | 400.1                                   |
| <i>Gulo gulo</i>                | <i>Ggu</i> | 13.50                  | <i>Gulo gulo</i>                                           | 405.0                             | 607.5                                   |
| <i>Hespestes ichneumon</i>      | <i>Hic</i> | 8.89                   | mean of <i>Oricefelis</i> , sp                             | 266.7                             | 400.1                                   |
| <i>Hystrix cristata</i>         | <i>Hcr</i> | 1.62                   | mean of Erethizontidae                                     | 48.6                              | 72.9                                    |
| <i>Lepus timidus</i>            | <i>Lti</i> | 4.12                   | mean of <i>Lepus</i> , sp                                  | 123.6                             | 185.4                                   |
| <i>Lutra lutra</i>              | <i>Llu</i> | 10.20                  | mean of <i>Lontra</i> , sp                                 | 306.0                             | 459.0                                   |
| <i>Lynx lynx</i>                | <i>Lly</i> | 11.70                  | <i>Lynx canadensis</i>                                     | 351.0                             | 526.5                                   |
| <i>Lynx pardinus</i>            | <i>Lpa</i> | 11.70                  | <i>Lynx canadensis</i>                                     | 351.0                             | 526.5                                   |
| <i>Martes martes</i>            | <i>Mma</i> | 1.69                   | <i>Martes americana</i>                                    | 50.7                              | 76.1                                    |
| <i>Microtus cabreræ</i>         | <i>Mca</i> | 1.79                   | mean of <i>Microtus</i> , sp                               | 53.7                              | 80.6                                    |
| <i>Muscardinus avellanarius</i> | <i>Mav</i> | 1.00                   | mean of Sciuridae, except <i>Marmota</i> because of weight | 30.0                              | 45.0                                    |
| <i>Mustela lutreola</i>         | <i>Mlu</i> | 1.25                   | mean of <i>Mustela africana</i> & <i>Mustela erminea</i>   | 37.5                              | 56.3                                    |
| <i>Mustela putorius</i>         | <i>Mpu</i> | 1.25                   | mean of <i>Mustela africana</i> & <i>Mustela erminea</i>   | 37.5                              | 56.3                                    |
| <i>Ovis ammon</i>               | <i>Oam</i> | 14.66                  | <i>Ovis canadensis</i>                                     | 439.8                             | 659.7                                   |
| <i>Pteromys volans</i>          | <i>Pvo</i> | 0.43                   | mean of <i>Tamias</i> , sp                                 | 12.9                              | 19.4                                    |
| <i>Rupicapra rupicapra</i>      | <i>Rru</i> | 14.66                  | <i>Ovis canadensis</i>                                     | 439.8                             | 659.7                                   |
| <i>Sicista betulina</i>         | <i>Sbe</i> | 0.27                   | <i>Napacozapus insignis</i>                                | 8.1                               | 12.2                                    |
| <i>Spermophilus citellus</i>    | <i>Sci</i> | 1.27                   | mean of <i>Spermophilus</i>                                | 38.1                              | 57.2                                    |
| <i>Ursus arctos</i>             | <i>Uar</i> | 5.84                   | mean of <i>Ursus</i> , sp                                  | 175.2                             | 262.8                                   |

**Table S4-** Comparisons of land uses (urb: urban areas; arab: arable land; grass: grassland; for: forest land; and crop: cropland) and conservation area coverage (Natura 2000, N2k; nationally-designated protected areas, PAs) and habitat disturbance (the human footprint index, HII) in sites crossed by several C<sup>s</sup> SATs of a species, against sites crossed by only one SAT. Effect size values are averages of Wilcoxon-strictly standardized mean difference taken from significant test ( $P < 0.05$ ) among species. Positive/negative values (e+/e-) indicate that convergence points present higher/lower coverage or disturbance of the tested variables when compared with the non-convergence sites. n+/n- is the number of species with positive/negative effect size. Analyses were performed for each of the three climate x four dispersal scenarios tested. Each table refer to a time-period in **C<sup>s</sup> SAT sets**.

### Baseline period

|       |    | RCP45   |         |         |         | RCP60   |         |         |         | RCP85   |         |         |         |
|-------|----|---------|---------|---------|---------|---------|---------|---------|---------|---------|---------|---------|---------|
|       |    | D1      | D2      | D3      | D4      | D1      | D2      | D3      | D4      | D1      | D2      | D3      | D4      |
| PAs   | n+ | 1       | 1       | 1       | 3       | 1       | 0       | 0       | 0       | 1       | 2       | 1       | 0       |
|       | e+ | 0.5604  | 0.5781  | 0.5163  | 0.4869  | 0.2306  | -       | -       | -       | 0.6615  | 0.2989  | 0.4641  | -       |
|       | n- | 0       | 1       | 2       | 2       | 2       | 3       | 3       | 1       | 2       | 1       | 2       | 2       |
|       | e- | -       | -0.2483 | -0.2385 | -0.1460 | -0.1950 | -0.3117 | -0.3941 | -0.1358 | -0.3994 | -0.3081 | -0.1125 | -0.1790 |
| N2k   | n+ | 3       | 3       | 3       | 4       | 3       | 3       | 3       | 2       | 2       | 3       | 3       | 1       |
|       | e+ | 0.4313  | 0.3850  | 0.3067  | 0.4202  | 0.3946  | 0.3919  | 0.3642  | 0.3096  | 0.3597  | 0.2404  | 0.2866  | 0.2701  |
|       | n- | 3       | 1       | 1       | 0       | 3       | 2       | 1       | 1       | 3       | 2       | 1       | 1       |
|       | e- | -0.2446 | -0.1322 | -0.1096 | -       | -0.2679 | -0.1325 | -0.1168 | -0.1439 | -0.3263 | -0.4195 | -0.3553 | -0.3181 |
| HII   | n+ | 2       | 3       | 4       | 3       | 4       | 5       | 5       | 4       | 4       | 4       | 2       | 2       |
|       | e+ | 0.4076  | 0.4882  | 0.4422  | 0.4569  | 0.5389  | 0.5084  | 0.5993  | 0.6860  | 0.4010  | 0.4884  | 0.7049  | 0.8247  |
|       | n- | 5       | 5       | 5       | 5       | 5       | 5       | 4       | 4       | 5       | 7       | 4       | 3       |
|       | e- | -0.3645 | -0.3543 | -0.3998 | -0.4043 | -0.3507 | -0.3598 | -0.3647 | -0.3960 | -0.3752 | -0.4764 | -0.3123 | -0.3303 |
| urb   | n+ | 0       | 0       | 0       | 1       | 2       | 2       | 2       | 3       | 2       | 1       | 2       | 2       |
|       | e+ | -       | -       | -       | 0.4026  | 0.3024  | 0.2471  | 0.2941  | 0.3900  | 0.1932  | 0.1661  | 0.1974  | 0.3677  |
|       | n- | 2       | 1       | 2       | 0       | 2       | 2       | 2       | 0       | 2       | 3       | 1       | 2       |
|       | e- | -0.3157 | -0.1923 | -0.4711 | -       | -0.3071 | -0.2675 | -0.2934 | -       | -0.2757 | -0.1973 | -0.1699 | -0.3236 |
| arab  | n+ | 2       | 2       | 4       | 5       | 2       | 2       | 4       | 4       | 3       | 3       | 4       | 5       |
|       | e+ | 0.5113  | 0.6619  | 0.6163  | 0.6239  | 0.5136  | 0.5582  | 0.7777  | 0.5894  | 0.4183  | 0.7152  | 0.6020  | 0.6562  |
|       | n- | 2       | 2       | 3       | 1       | 2       | 2       | 2       | 2       | 2       | 3       | 1       | 1       |
|       | e- | -0.3532 | -0.3708 | -1.3010 | -0.3713 | -0.3778 | -0.3766 | -0.3335 | -0.3253 | -0.5513 | -0.6409 | -0.4353 | -0.3823 |
| grass | n+ | 0       | 0       | 0       | 0       | 0       | 1       | 1       | 1       | 0       | 0       | 0       | 0       |
|       | e+ | -       | -       | -       | -       | -       | 0.0862  | 0.3142  | 0.1646  | -       | -       | -       | -       |
|       | n- | 3       | 2       | 0       | 1       | 1       | 1       | 1       | 2       | 2       | 3       | 1       | 2       |
|       | e- | -0.1563 | -0.1817 | -       | -0.5363 | -0.3997 | -0.4700 | -0.5704 | -0.5758 | -0.2571 | -0.5486 | -0.3964 | -0.4664 |
| for   | n+ | 4       | 2       | 1       | 2       | 2       | 3       | 3       | 2       | 4       | 5       | 4       | 3       |
|       | e+ | 0.3462  | 0.3722  | 0.4427  | 0.5840  | 0.4662  | 0.4383  | 0.3917  | 0.6431  | 0.3212  | 0.3535  | 0.4931  | 0.6377  |
|       | n- | 3       | 4       | 4       | 4       | 3       | 3       | 4       | 4       | 3       | 4       | 3       | 2       |
|       | e- | -0.3618 | -0.3651 | -0.3979 | -0.4876 | -0.3448 | -0.3194 | -0.4164 | -0.4890 | -0.4724 | -0.4486 | -0.5431 | -0.8190 |
| crop  | n+ | 1       | 1       | 1       | 0       | 2       | 1       | 2       | 1       | 0       | 2       | 0       | 0       |
|       | e+ | 0.3152  | 0.2873  | 1.6273  | -       | 0.8772  | 0.3033  | 0.3630  | 0.6304  | -       | 0.9463  | -       | -       |
|       | n- | 6       | 6       | 6       | 5       | 6       | 6       | 3       | 4       | 5       | 5       | 3       | 5       |
|       | e- | -0.4113 | -0.4980 | -0.6564 | -0.5978 | -0.3587 | -0.3605 | -0.3543 | -0.4312 | -0.6362 | -0.4473 | -0.4478 | -0.4512 |

(continued)

2020

|       |    | RCP45   |         |         |         | RCP60   |         |         |         | RCP85   |         |         |         |
|-------|----|---------|---------|---------|---------|---------|---------|---------|---------|---------|---------|---------|---------|
|       |    | D1      | D2      | D3      | D4      | D1      | D2      | D3      | D4      | D1      | D2      | D3      | D4      |
| PA    | n+ | 1       | 1       | 0       | 2       | 1       | 0       | 0       | 0       | 2       | 1       | 1       | 1       |
|       | e+ | 0.4864  | 0.3883  | -       | 0.4642  | 0.2824  | -       | -       | -       | 0.4275  | 0.5113  | 0.3028  | 0.3725  |
|       | n- | 1       | 0       | 0       | 2       | 2       | 1       | 2       | 2       | 4       | 2       | 1       | 1       |
|       | e- | -0.3574 | -       | -       | -0.4204 | -0.1389 | -0.8764 | -0.4287 | -0.1520 | -0.2013 | -0.1890 | -0.1306 | -0.2614 |
| N2K   | n+ | 3       | 3       | 3       | 3       | 3       | 3       | 3       | 2       | 2       | 2       | 3       | 3       |
|       | e+ | 0.3970  | 0.3736  | 0.3421  | 0.3517  | 0.2863  | 0.3960  | 0.3427  | 0.3531  | 0.3084  | 0.2671  | 0.3424  | 0.4044  |
|       | n- | 4       | 1       | 0       | 0       | 4       | 3       | 1       | 0       | 4       | 3       | 1       | 1       |
|       | e- | -0.3041 | -0.1367 | -       | -       | -0.3301 | -0.2711 | -0.0720 | -       | -0.4274 | -0.3183 | -0.3258 | -0.3224 |
| HII   | n+ | 2       | 1       | 3       | 3       | 2       | 3       | 3       | 3       | 3       | 2       | 3       | 1       |
|       | e+ | 0.3271  | 0.4079  | 0.6180  | 0.5920  | 0.6579  | 0.6771  | 0.6386  | 0.6777  | 0.3521  | 0.3977  | 0.4904  | 0.3425  |
|       | n- | 6       | 5       | 7       | 8       | 7       | 6       | 4       | 5       | 5       | 5       | 5       | 4       |
|       | e- | -0.4093 | -0.3861 | -0.3903 | -0.6621 | -0.4018 | -0.4376 | -0.4071 | -0.3925 | -0.3855 | -0.4227 | -0.4695 | -0.4925 |
| urb   | n+ | 0       | 0       | 0       | 1       | 1       | 2       | 1       | 3       | 1       | 1       | 1       | 2       |
|       | e+ | -       | -       | -       | 0.6048  | 0.4591  | 0.4681  | 0.4207  | 0.3505  | 0.1544  | 0.1503  | 0.1531  | 0.2183  |
|       | n- | 5       | 4       | 2       | 1       | 4       | 3       | 3       | 2       | 3       | 4       | 3       | 4       |
|       | e- | -0.3407 | -0.4024 | -0.3181 | -0.1995 | -0.2789 | -0.2702 | -0.2846 | -0.2169 | -0.3226 | -0.2564 | -0.2943 | -0.3118 |
| arab  | n+ | 2       | 2       | 3       | 3       | 2       | 2       | 4       | 4       | 2       | 3       | 3       | 5       |
|       | e+ | 0.5488  | 0.4734  | 0.5213  | 0.6976  | 0.4518  | 0.3493  | 0.5188  | 0.4870  | 0.6087  | 0.6002  | 0.6333  | 0.6160  |
|       | n- | 4       | 2       | 3       | 2       | 3       | 4       | 3       | 3       | 4       | 3       | 2       | 2       |
|       | e- | -0.3296 | -0.3680 | -0.3931 | -0.4097 | -0.3728 | -0.5003 | -0.3423 | -0.3509 | -0.5230 | -0.4789 | -0.4488 | -0.4243 |
| grass | n+ | 0       | 0       | 1       | 1       | 0       | 0       | 1       | 1       | 0       | 0       | 0       | 0       |
|       | e+ | -       | -       | 0.0759  | 0.0793  | -       | -       | 0.2804  | 0.1557  | -       | -       | -       | -       |
|       | n- | 3       | 4       | 2       | 2       | 2       | 4       | 2       | 2       | 3       | 3       | 3       | 2       |
|       | e- | -0.3150 | -0.3307 | -0.4586 | -0.5181 | -0.4772 | -0.8517 | -0.4713 | -0.5655 | -0.3266 | -0.3449 | -0.3462 | -0.4889 |
| for   | n+ | 3       | 2       | 3       | 2       | 4       | 3       | 4       | 3       | 3       | 3       | 4       | 3       |
|       | e+ | 0.3926  | 0.3570  | 0.3391  | 0.5974  | 0.5422  | 0.4378  | 0.5212  | 0.4024  | 0.2933  | 0.3541  | 0.5350  | 0.3977  |
|       | n- | 3       | 4       | 4       | 3       | 3       | 4       | 4       | 2       | 4       | 6       | 4       | 3       |
|       | e- | -0.3425 | -0.4234 | -0.4022 | -0.4688 | -0.3152 | -0.3889 | -0.3928 | -0.4734 | -0.6333 | -0.8423 | -0.7085 | -0.5730 |
| crop  | n+ | 1       | 1       | 1       | 0       | 3       | 2       | 2       | 1       | 3       | 2       | 2       | 0       |
|       | e+ | 0.3763  | 0.3596  | 0.3159  | -       | 0.4239  | 0.3643  | 0.3598  | 0.5455  | 0.5740  | 0.5703  | 0.5609  | -       |
|       | n- | 4       | 3       | 5       | 7       | 4       | 3       | 4       | 3       | 4       | 5       | 5       | 4       |
|       | e- | -0.3752 | -0.4191 | -0.6131 | -0.6420 | -0.3819 | -0.4331 | -0.4800 | -0.6437 | -0.9678 | -0.8230 | -0.4507 | -0.4428 |

(continued)

2050

|       |    | RCP45   |         |         |         | RCP60   |         |         |         | RCP85   |         |         |         |
|-------|----|---------|---------|---------|---------|---------|---------|---------|---------|---------|---------|---------|---------|
|       |    | D1      | D2      | D3      | D4      | D1      | D2      | D3      | D4      | D1      | D2      | D3      | D4      |
| PA    | n+ | 0       | 0       | 0       | 2       | 0       | 0       | 0       | 0       | 3       | 2       | 2       | 0       |
|       | e+ | -       | -       | -       | 0.4566  | -       | -       | -       | -       | 0.3539  | 0.3237  | 0.2403  | -       |
|       | n- | 0       | 1       | 1       | 0       | 1       | 1       | 2       | 1       | 5       | 2       | 2       | 2       |
|       | e- | -       | -0.2112 | -0.2635 | -       | -0.2700 | -0.8463 | -0.6750 | -0.1464 | -0.3563 | -0.1745 | -0.1774 | -0.5013 |
| N2K   | n+ | 3       | 2       | 3       | 3       | 2       | 2       | 2       | 2       | 2       | 2       | 2       | 2       |
|       | e+ | 0.3819  | 0.3124  | 0.3496  | 0.3307  | 0.3199  | 0.3225  | 0.2934  | 0.2875  | 0.3001  | 0.2851  | 0.2925  | 0.2840  |
|       | n- | 2       | 1       | 1       | 0       | 3       | 2       | 2       | 1       | 3       | 3       | 2       | 2       |
|       | e- | -0.1626 | -0.1837 | -0.1663 | -       | -0.2999 | -0.5126 | -0.4218 | -0.3092 | -0.4252 | -0.3559 | -0.3977 | -0.4504 |
| HII   | n+ | 2       | 1       | 3       | 3       | 2       | 3       | 4       | 3       | 1       | 1       | 4       | 2       |
|       | e+ | 0.4809  | 0.3677  | 0.4395  | 0.3404  | 0.6328  | 0.5908  | 0.6530  | 0.5670  | 0.5073  | 0.4607  | 0.4890  | 0.3715  |
|       | n- | 7       | 6       | 5       | 6       | 6       | 6       | 5       | 5       | 5       | 6       | 4       | 4       |
|       | e- | -0.4115 | -0.3894 | -0.3863 | -0.3670 | -0.4429 | -0.4614 | -0.3999 | -0.4077 | -0.4687 | -0.4918 | -0.3974 | -0.3647 |
| urb   | n+ | 0       | 0       | 0       | 0       | 1       | 1       | 2       | 3       | 0       | 0       | 1       | 0       |
|       | e+ | -       | -       | -       | -       | 0.3858  | 0.3561  | 0.3250  | 0.3402  | -       | -       | 0.4437  | -       |
|       | n- | 5       | 3       | 2       | 2       | 3       | 2       | 2       | 2       | 4       | 4       | 4       | 2       |
|       | e- | -0.3022 | -0.2723 | -0.3201 | -0.2810 | -0.3156 | -0.2858 | -0.3173 | -0.2821 | -0.2751 | -0.2381 | -0.2551 | -0.2586 |
| arab  | n+ | 2       | 1       | 2       | 3       | 2       | 1       | 3       | 3       | 2       | 1       | 3       | 4       |
|       | e+ | 0.5366  | 0.7405  | 0.6983  | 0.6413  | 0.4911  | 0.6903  | 0.6568  | 0.5512  | 0.5687  | 0.9027  | 0.4970  | 0.5416  |
|       | n- | 4       | 2       | 3       | 1       | 3       | 3       | 2       | 3       | 4       | 4       | 4       | 4       |
|       | e- | -0.3339 | -0.3938 | -0.4022 | -0.4227 | -0.3432 | -0.3279 | -0.3570 | -0.3742 | -0.5143 | -0.4743 | -0.3500 | -0.4386 |
| grass | n+ | 0       | 0       | 0       | 0       | 1       | 0       | 1       | 1       | 1       | 1       | 1       | 1       |
|       | e+ | -       | -       | -       | -       | 0.2368  | -       | 0.3926  | 0.2306  | 0.2703  | 0.2696  | 0.3042  | 0.3525  |
|       | n- | 3       | 3       | 2       | 2       | 3       | 2       | 2       | 2       | 4       | 4       | 3       | 2       |
|       | e- | -0.3800 | -0.3354 | -0.4995 | -0.5172 | -0.4549 | -0.5829 | -0.5790 | -0.5792 | -0.3816 | -0.4025 | -0.5029 | -0.6620 |
| for   | n+ | 3       | 3       | 3       | 4       | 4       | 5       | 4       | 4       | 4       | 2       | 3       | 4       |
|       | e+ | 0.4206  | 0.2995  | 0.4796  | 0.5933  | 0.4756  | 0.4556  | 0.3856  | 0.4077  | 0.6244  | 0.4102  | 0.4009  | 0.4458  |
|       | n- | 4       | 5       | 6       | 5       | 4       | 5       | 5       | 6       | 2       | 3       | 5       | 3       |
|       | e- | -0.3672 | -0.4193 | -0.4408 | -0.3747 | -0.3406 | -0.3948 | -0.4377 | -0.3693 | -0.3863 | -0.3394 | -0.4081 | -0.3593 |
| crop  | n+ | 1       | 2       | 2       | 1       | 2       | 3       | 3       | 2       | 2       | 3       | 1       | 1       |
|       | e+ | 0.3783  | 0.3026  | 0.2689  | 0.3550  | 0.3421  | 0.2871  | 0.3480  | 0.4321  | 0.4398  | 0.4799  | 0.7510  | 0.2702  |
|       | n- | 6       | 6       | 4       | 4       | 5       | 4       | 3       | 5       | 4       | 6       | 5       | 3       |
|       | e- | -0.4443 | -0.4243 | -0.6306 | -0.5521 | -0.4001 | -0.3537 | -0.3632 | -0.7141 | -0.4745 | -0.4608 | -0.5872 | -0.4990 |

(continued)

## 2080

|       |    | RCP45   |         |         |         | RCP60   |         |         |         | RCP85   |         |         |         |
|-------|----|---------|---------|---------|---------|---------|---------|---------|---------|---------|---------|---------|---------|
|       |    | D1      | D2      | D3      | D4      | D1      | D2      | D3      | D4      | D1      | D2      | D3      | D4      |
| PA    | n+ | 2       | 0       | 1       | 3       | 0       | 0       | 0       | 0       | 3       | 3       | 2       | 1       |
|       | e+ | 0.3186  | -       | 0.2727  | 0.4341  | -       | -       | -       | -       | 0.3779  | 0.3271  | 0.3040  | 0.2514  |
|       | n- | 2       | 0       | 2       | 1       | 1       | 1       | 3       | 2       | 3       | 2       | 2       | 1       |
|       | e- | -0.1790 | -       | -0.3039 | -0.1112 | -0.1661 | -0.0873 | -0.5863 | -0.7701 | -0.2412 | -0.1674 | -0.5204 | -0.2059 |
| N2K   | n+ | 2       | 1       | 2       | 3       | 2       | 2       | 3       | 2       | 5       | 1       | 3       | 4       |
|       | e+ | 0.3151  | 0.2741  | 0.2708  | 0.3024  | 0.3553  | 0.2591  | 0.3221  | 0.2704  | 0.3029  | 0.3138  | 0.4304  | 0.4570  |
|       | n- | 1       | 2       | 1       | 1       | 1       | 2       | 2       | 1       | 1       | 2       | 2       | 2       |
|       | e- | -0.1936 | -0.1528 | -0.1178 | -0.1274 | -0.2015 | -0.3376 | -0.5342 | -0.3019 | -0.3591 | -0.4367 | -0.5406 | -0.3202 |
| HII   | n+ | 1       | 1       | 3       | 3       | 2       | 3       | 4       | 4       | 3       | 2       | 3       | 2       |
|       | e+ | 0.4633  | 0.4538  | 0.5868  | 0.4303  | 0.6640  | 0.6129  | 0.6772  | 0.5547  | 0.5653  | 0.6812  | 0.4708  | 0.7342  |
|       | n- | 7       | 7       | 6       | 7       | 7       | 7       | 6       | 8       | 5       | 5       | 6       | 5       |
|       | e- | -0.4459 | -0.4894 | -0.4473 | -0.4576 | -0.4580 | -0.5265 | -0.4554 | -0.4265 | -0.4880 | -0.4503 | -0.4977 | -0.3335 |
| urb   | n+ | 0       | 1       | 1       | 0       | 1       | 1       | 3       | 3       | 0       | 1       | 0       | 1       |
|       | e+ | -       | 0.4409  | 0.4737  | -       | 0.4368  | 0.3966  | 0.3228  | 0.5043  | -       | 0.5689  | -       | 0.0336  |
|       | n- | 4       | 5       | 2       | 2       | 6       | 3       | 2       | 2       | 4       | 4       | 3       | 3       |
|       | e- | -0.3612 | -0.3156 | -0.3366 | -0.3408 | -0.2925 | -0.3382 | -0.3314 | -0.3180 | -0.3373 | -0.3683 | -0.3083 | -0.3641 |
| arab  | n+ | 1       | 2       | 2       | 4       | 1       | 1       | 2       | 4       | 1       | 1       | 2       | 2       |
|       | e+ | 0.8272  | 0.5760  | 0.8427  | 0.5791  | 0.7337  | 0.7109  | 0.8055  | 0.5366  | 0.9721  | 0.9243  | 0.5122  | 0.4618  |
|       | n- | 4       | 2       | 4       | 3       | 2       | 2       | 2       | 3       | 4       | 3       | 3       | 4       |
|       | e- | -0.3714 | -0.4208 | -0.4438 | -0.4021 | -0.3766 | -0.3910 | -0.3557 | -0.4334 | -0.5437 | -0.6027 | -0.3409 | -0.4150 |
| grass | n+ | 0       | 1       | 0       | 1       | 0       | 1       | 2       | 2       | 1       | 1       | 2       | 1       |
|       | e+ | -       | 0.2174  | -       | 0.3083  | -       | 0.2226  | 0.3274  | 0.2397  | 0.1946  | 0.2291  | 0.3135  | 0.3131  |
|       | n- | 4       | 4       | 3       | 4       | 5       | 3       | 4       | 2       | 5       | 4       | 3       | 2       |
|       | e- | -0.3397 | -0.3600 | -0.3572 | -0.6977 | -0.3260 | -0.3641 | -0.3568 | -0.6080 | -0.3675 | -0.3794 | -0.3836 | -0.5208 |
| for   | n+ | 2       | 3       | 4       | 4       | 3       | 3       | 3       | 3       | 4       | 4       | 3       | 4       |
|       | e+ | 0.3431  | 0.3207  | 0.3872  | 0.4467  | 0.4645  | 0.4429  | 0.4380  | 0.5103  | 0.4229  | 0.5442  | 0.4509  | 0.4255  |
|       | n- | 5       | 4       | 7       | 5       | 4       | 5       | 5       | 6       | 2       | 3       | 3       | 6       |
|       | e- | -0.4028 | -0.3341 | -0.4501 | -0.4920 | -0.3340 | -0.4159 | -0.4502 | -0.6381 | -0.3666 | -0.2292 | -0.2801 | -0.3561 |
| crop  | n+ | 1       | 3       | 2       | 2       | 3       | 3       | 4       | 3       | 2       | 3       | 2       | 1       |
|       | e+ | 0.3461  | 0.2478  | 0.3349  | 0.3709  | 0.2892  | 0.3081  | 0.5481  | 0.4006  | 0.4994  | 0.4209  | 0.3217  | 0.3595  |
|       | n- | 4       | 5       | 5       | 4       | 4       | 4       | 3       | 4       | 7       | 7       | 6       | 5       |
|       | e- | -0.4045 | -0.3458 | -0.5386 | -0.5092 | -0.3752 | -0.3166 | -0.3674 | -0.3690 | -0.5157 | -0.5247 | -0.6266 | -0.5176 |



**Table S5-** Summary of univariate regression of relative frequency selection of sites crossed by SATs in  $C^s$  among the 12 runs obtained by varying climate x dispersal scenarios for each of the four time periods against: land use coverage (Urb: urban areas; Arab: arable lands; Grass: grasslands; For: forest lands; Crop: Croplands); conservation area coverage (Natura 2000, N2k; and nationally-designated protected areas, PAs); habitat disturbance (measured with the human footprint index, HII); summed persistence scores of species SATs crossing the sites (either in the non-independent sets,  $C^s$ , and in the independent sets,  $C^I$ ) and; the number of trajectories converging in sites (Converg). The plus and minus signs refer to positive and negative slopes ( $\beta_{freq}$ ) obtained in regression. Average refers to the average of statistical significant slopes,  $\beta_{freq}$  ( $P$ -value  $\leq 0.05$ ); sd refers to the standard deviation of statistical significant slopes and nsp refers to the number of species with statistically significant slopes.

|          | Land use |         |         |         |         | Conserv areas |         | HII     | Pers        |        | Converg |
|----------|----------|---------|---------|---------|---------|---------------|---------|---------|-------------|--------|---------|
|          | Urb      | Arab    | Grass   | For     | Crop    | N2k           | PAs     |         | $C^s/C50^s$ | $C^I$  |         |
| <b>+</b> |          |         |         |         |         |               |         |         |             |        |         |
| average  | 0.0035   | 0.0030  | 0.0037  | 0.0050  | 0.0052  | 0.0017        | 0.0065  | 0.0115  | 1.0471      | 0.3642 | 7.4487  |
| sd       | 0.0009   | 0.0014  | 0.0020  | 0.0009  | 0.0013  | 0.0008        | 0.0031  | 0.0046  | 1.1264      | 0.4360 | 15.8481 |
| nsp      | 2        | 7       | 7       | 1       | 2       | 5             | 5       | 4       | 29          | 28     | 29      |
| <b>-</b> |          |         |         |         |         |               |         |         |             |        |         |
| average  | -0.0311  | -0.0044 | -0.0101 | -0.0138 | -0.0116 | -0.0027       | -0.0058 | -0.0110 | na          | na     | na      |
| sd       | 0.0377   | 0.0023  | 0.0055  | 0.0064  | 0.0061  | 0.0011        | 0.0027  | 0.0057  | na          | na     | na      |
| nsp      | 12       | 6       | 7       | 6       | 9       | 5             | 7       | 10      | 0           | 0      | 0       |
