# Supplementary material for: Spatial Adaptive Responses of Highly Threatened European Mammal Species under Climate Change
Source: Preprints.org preprint supplement (doi:10.20944/preprints202111.0550.v1), 2021-11-29
Supplement: Supplementary file 1 [file Tab S7.xlsx]

## Sheet: PA
	Baseline												2020												2050												2080
	RCP 8.5				RCP 6.0				RCP 4.5				RCP 8.5				RCP 6.0				RCP 4.5				RCP 8.5				RCP 6.0				RCP 4.5				RCP 8.5				RCP 6.0				RCP 4.5
###	D1	D2	D3	D4	D1	D2	D3	D4	D1	D2	D3	D4	D1	D2	D3	D4	D1	D2	D3	D4	D1	D2	D3	D4	D1	D2	D3	D4	D1	D2	D3	D4	D1	D2	D3	D4	D1	D2	D3	D4	D1	D2	D3	D4	D1	D2	D3	D4
Aal	0.0723627	0.0723627	0.0723627	0.0863829	0.0529277	0.0529277	0.0682617	0.08527	0.0176681	0.0713475	0.0883816	0.149602	0.0341739	0.0426072	0.0426072	0.0426072	-0.0228745	-0.0163436	-0.0126549	0.0616494	0.000380666	0.0342164	0.0658606	0.107479	0.00887713	0.0227496	0.03508	0.0606034	-0.00402581	0.00849765	0.00750654	-0.090045	0.0938273	0.0555393	-0.0515292	-0.0997979	-0.00937488	-0.0103388	0.0206171	0.0206171	-0.0417285	-0.0209074	-0.0122859	0.0331101	0.0340626	0.0474865	0.0465214	0.0746044
Gpy	0.0566374	0.026322	-0.0335803	0.0242448	-0.0370685	-0.0415229	-0.109611	-0.0574102	0.0140229	-0.00856999	-0.0442964	0.0106555	0.129527	0.0766298	0.0660136	0.080053	0.04625	0.0144116	-0.0101751	0.0353893	0.072278	0.0272482	0.037646	0.0457188	0.224965	0.171885	0.155711	0.0754825	0.123194	0.102832	0.0704076	-0.00131268	0.107474	0.0701388	0.0908588	0.113392	0.302244	0.25037	0.243167	0.251405	0.162486	0.148081	0.116399	0.131912	0.155287	0.0859928	0.123302	0.13219
Lti	NA	NA	NA	NA	NA	NA	NA	NA	NA	NA	NA	NA	NA	NA	NA	NA	NA	NA	NA	NA	NA	NA	NA	NA	NA	NA	NA	NA	NA	NA	NA	NA	NA	NA	NA	NA	NA	NA	NA	NA	NA	NA	NA	NA	NA	NA	NA	NA
Sci	NA	NA	NA	NA	NA	NA	NA	NA	NA	NA	NA	NA	NA	NA	NA	NA	NA	NA	NA	NA	NA	NA	NA	NA	NA	NA	NA	NA	NA	NA	NA	NA	NA	NA	NA	NA	NA	NA	NA	NA	NA	NA	NA	NA	NA	NA	NA	NA
Pvo	-0.0964278	-0.0994235	-0.0959445	-0.0731033	-0.0306673	-0.0361131	-0.0389578	-0.081109	NA	NA	NA	NA	-0.13199	-0.141066	-0.13059	-0.101505	-0.11651	-0.115109	-0.109211	-0.109211	NA	NA	NA	NA	-0.14431	-0.133806	-0.123646	-0.094706	-0.140256	-0.13684	-0.138098	-0.138098	NA	NA	NA	NA	-0.222101	-0.222101	-0.222101	-0.224542	-0.0868588	-0.127902	-0.121879	-0.0932717	NA	NA	NA	NA
Cfi	NA	NA	-0.14101	-0.0138114	NA	NA	0.0171968	0.0522976	NA	NA	0.439563	0.434419	NA	-0.189394	0.0963324	-0.0498835	NA	NA	-0.0414	-0.00914811	NA	NA	0.483869	0.431192	NA	-0.189394	0.0514569	-0.0677827	NA	NA	-0.0559831	-0.015519	NA	NA	0.483869	0.416041	NA	0.0660491	0.164513	-0.00413557	NA	NA	-0.114656	0.0568345	NA	NA	0.276858	0.294575
Ccr	NA	NA	NA	NA	NA	NA	NA	NA	NA	NA	NA	NA	NA	NA	NA	NA	NA	NA	NA	NA	NA	NA	NA	NA	NA	NA	NA	NA	NA	NA	NA	NA	NA	NA	NA	NA	NA	NA	NA	NA	NA	NA	NA	NA	NA	NA	NA	NA
Mca	-0.0154199	0.109803	-0.0491238	-0.0720735	0.104213	0.104429	-0.111469	-0.0605917	0.122207	0.102324	0.167027	0.19125	0.00749849	0.127177	-0.0081838	-0.00387892	0.113659	0.121989	-0.0817552	-0.00790624	0.1262	0.125425	0.190491	0.195713	-0.0355745	0.0926001	-0.0491428	-0.0719809	0.0975029	0.100193	-0.111191	-0.0659761	0.0997914	0.102285	0.169903	0.185931	-0.126063	-0.0645537	-0.0643122	-0.0750272	-0.0360777	-0.0674985	-0.113093	-0.0835401	0.110497	-0.0752018	-0.042369	-0.0439353
Mav	NA	NA	NA	NA	NA	NA	NA	NA	NA	NA	NA	NA	NA	NA	NA	NA	NA	NA	NA	NA	NA	NA	NA	NA	NA	NA	NA	NA	NA	NA	NA	NA	NA	NA	NA	NA	NA	NA	NA	NA	NA	NA	NA	NA	NA	NA	NA	NA
Dni	-0.481722	-0.30806	-0.202258	-0.244668	-0.387832	-0.244279	-0.180355	-0.235925	-0.13223	-0.136449	-0.185202	-0.16727	-0.311731	-0.236982	-0.17789	-0.261375	-0.176524	-0.0266111	-0.035788	-0.101485	-0.105496	0.0239452	-0.00785585	-0.040971	-0.281243	-0.21522	-0.231057	-0.314573	-0.170278	-0.0281331	-0.0341863	-0.0839843	-0.0903259	0.0456938	-0.0116637	-0.03921	-0.288686	-0.242662	-0.138996	-0.205857	-0.186441	-0.128563	-0.0711855	-0.133975	-0.0977387	-0.0370767	-0.0812082	-0.111204
Sbe	NA	NA	NA	NA	NA	NA	NA	NA	NA	NA	NA	NA	NA	NA	NA	NA	NA	NA	NA	NA	NA	NA	NA	NA	NA	NA	NA	NA	NA	NA	NA	NA	NA	NA	NA	NA	NA	NA	NA	NA	NA	NA	NA	NA	NA	NA	NA	NA
Hcr	-0.151471	-0.106086	-0.108531	-0.039015	-0.152909	-0.117954	-0.0958818	-0.0156106	-0.0926966	-0.0292577	-0.0262578	-0.0948176	-0.196266	-0.161148	-0.152311	-0.0884718	-0.196912	-0.144969	-0.13595	-0.0783902	-0.214148	-0.168736	-0.222047	-0.156506	-0.246215	-0.218397	-0.212421	-0.170451	-0.245011	-0.196961	-0.193221	-0.150197	-0.239954	-0.196048	-0.263503	-0.182075	-0.197049	-0.174328	-0.130814	-0.0794999	-0.191963	-0.147029	-0.133369	-0.0691978	-0.260176	-0.226358	-0.282754	-0.247204
Cau	NA	NA	NA	NA	NA	NA	NA	NA	NA	NA	NA	NA	NA	NA	NA	NA	NA	NA	NA	NA	NA	NA	NA	NA	NA	NA	NA	NA	NA	NA	NA	NA	NA	NA	NA	NA	NA	NA	NA	NA	NA	NA	NA	NA	NA	NA	NA	NA
Clu	0.292479	NA	NA	NA	0.273781	NA	0.246507	0.230448	0.262981	0.261795	0.273732	NA	0.311889	0.248611	0.268414	0.279681	0.254121	0.255092	0.246302	0.22726	0.259747	0.253888	0.260633	0.260415	0.298073	NA	0.24007	NA	0.261111	0.260106	0.234674	0.235907	0.256915	0.255604	0.269494	NA	-0.140929	-0.11765	-0.0511428	-0.156191	0.255506	0.229774	0.247821	0.0905329	0.259419	0.258182	0.272653	NA
Ala	-0.126536	NA	NA	NA	-0.131082	-0.450598	NA	0.336909	-0.000718227	-0.0895958	-0.0431753	-0.0746578	-0.0422952	NA	NA	NA	-0.305673	0.0363171	0.561112	0.600167	0.549057	0.501906	NA	-0.0110858	0.0374956	NA	NA	0.154264	-0.328788	-0.804006	NA	NA	0.64584	NA	0.172913	-1.14154	0.319185	NA	NA	NA	NA	-2.21786	NA	NA	-0.179944	0.243607	0.103326	-0.297549
Uar	NA	-0.312743	0.0875473	0.118146	NA	NA	0.0669563	0.192085	NA	NA	0.5855	0.458317	NA	-0.180514	0.177764	0.159611	NA	NA	-0.167554	0.174814	NA	NA	0.0893161	0.497119	NA	-0.194916	0.15506	0.203004	NA	NA	-0.123484	0.241492	NA	NA	0.423612	0.497119	NA	-0.162385	0.134603	0.221914	NA	NA	-0.123484	0.102839	NA	NA	0.529755	0.458317
Mlu	-0.249218	-0.160606	0.038553	-0.0281448	-0.0789181	-0.0611357	-0.0346368	-0.0596191	-0.171207	-0.0544377	-0.0117083	-0.0656467	0.0736523	0.114788	0.189074	0.372546	0.268481	0.17405	0.109719	0.0648929	0.149747	0.0285054	0.0517128	0.0666175	0.0950185	0.212927	0.324928	0.389503	-0.16177	0.0394662	0.131329	-0.0451349	0.258134	0.264978	0.248481	0.248454	0.254623	0.327159	0.36487	0.210058	0.337567	0.366586	0.428145	0.0362543	0.246458	0.268904	0.276389	0.295497
Mpu	NA	NA	NA	NA	NA	NA	NA	NA	NA	NA	NA	NA	NA	NA	NA	NA	NA	NA	NA	NA	NA	NA	NA	NA	NA	NA	NA	NA	NA	NA	NA	NA	NA	NA	NA	NA	NA	NA	NA	NA	NA	NA	NA	NA	NA	NA	NA	NA
Mma	NA	NA	NA	NA	NA	NA	NA	NA	NA	NA	NA	NA	NA	NA	NA	NA	NA	NA	NA	NA	NA	NA	NA	NA	NA	NA	NA	NA	NA	NA	NA	NA	NA	NA	NA	NA	NA	NA	NA	NA	NA	NA	NA	NA	NA	NA	NA	NA
Ggu	-0.360215	0.0125792	NA	NA	-0.180967	-0.011142	-0.124469	-0.325615	0.0747603	-0.0993319	0.0406732	-0.175899	-0.1006	-0.354515	-0.603878	-0.354515	-0.14508	0.0782509	0.270179	0.133859	0.241836	0.005972	0.217375	0.152172	NA	NA	NA	NA	-0.21528	0.195803	NA	NA	0.230718	0.090951	0.134849	0.0625968	0.0210359	NA	NA	-1.9528	0.00805228	0.125539	NA	NA	0.689093	0.839789	0.926694	0.14129
Llu	-0.0607718	-0.0865363	-0.109386	-0.113264	-0.0208919	-0.0437644	-0.0907698	-0.0781333	-0.00898942	-0.0616157	-0.0829308	-0.0917647	-0.0783389	-0.0704086	-0.0944731	-0.102421	-0.0316714	-0.0543378	-0.0805103	-0.0805972	-0.0311241	-0.0716044	-0.088696	-0.092869	-0.0839877	-0.0859874	-0.0719632	-0.0733906	-0.0431187	-0.0606516	-0.0633992	-0.0503526	-0.037247	-0.0768046	-0.0675542	-0.0749348	-0.084313	-0.0921836	-0.100834	-0.107056	-0.0400937	-0.0698079	-0.0798489	-0.0611981	-0.0336533	-0.08098	-0.0786949	-0.094402
Fsi	0.661472	0.544748	0.464087	0.0606946	0.350732	0.341597	0.464449	0.524367	0.560354	0.578101	0.516323	0.568069	0.543123	0.51126	0.302837	-0.156139	0.367015	0.370172	0.467213	0.613206	0.486373	0.388295	0.229534	0.205372	0.538733	0.475515	0.378569	0.0796637	0.191128	0.306497	0.503246	0.404609	0.233432	0.16715	0.103574	0.0904883	0.415612	0.403665	0.290643	0.311286	0.320818	0.280212	0.288152	0.32065	0.358117	0.394876	0.333785	0.302826
Lly	NA	NA	NA	NA	NA	NA	NA	NA	NA	NA	NA	NA	NA	NA	NA	NA	NA	NA	NA	NA	NA	NA	NA	NA	NA	NA	NA	NA	NA	NA	NA	NA	NA	NA	NA	NA	NA	NA	NA	NA	NA	NA	NA	NA	NA	NA	NA	NA
Lpa	NA	NA	-0.574867	-0.57466	0.199639	-0.374364	0.162216	NA	0.180519	NA	NA	NA	NA	NA	NA	NA	0.23521	NA	NA	NA	0.194467	NA	NA	NA	NA	NA	NA	NA	NA	NA	NA	NA	-0.333146	NA	NA	NA	NA	NA	NA	NA	-0.575771	NA	NA	NA	0.196276	NA	-0.499909	NA
Hic	-0.167618	0.155958	0.172667	NA	0.180525	0.2063	0.218034	0.190302	0.175257	NA	0.186474	NA	-0.211432	NA	0.185338	0.142014	NA	-0.289982	-0.191044	-0.226643	0.170343	-0.268048	-0.237949	-0.204756	-0.145939	0.253645	0.277555	-0.191433	-0.143434	NA	-0.0869637	-0.127175	-0.12881	-0.0984378	-0.156978	-0.168764	-0.223123	NA	NA	NA	-0.247596	0.220968	0.235434	0.24584	-0.202293	0.19655	0.186733	0.196176
Gge	-0.0625378	-0.0652727	-0.138486	-0.277648	0.347018	-0.0286382	-0.0172606	0.288796	0.240722	0.34246	-0.0440535	-0.124685	NA	-0.0710076	-0.0236764	-0.215489	NA	-0.0678053	-0.023515	0.058233	0.241467	0.0181945	-0.178833	-0.323613	-0.324348	-0.266041	0.327079	-0.229227	NA	0.325883	0.187307	0.170008	0.212473	0.195488	0.184525	-0.256043	0.202487	0.204668	-0.234476	-0.224003	-0.285475	-0.304852	0.281735	-0.050396	-0.262715	-0.310159	-0.282883	-0.147292
Rru	-0.317072	0.0529945	-0.115569	-0.532576	-0.219054	-0.43503	-0.569172	-0.562506	-0.230182	-0.248295	-0.291723	-0.500066	-0.283142	0.263975	-0.10911	-0.630143	-0.260032	-0.335876	-0.488501	-0.561453	-0.233927	-0.231913	-0.0999418	-0.517241	-0.363706	0.243726	0.221301	-0.68794	-0.219694	-0.28308	-0.48868	-0.613916	-0.221641	-0.211236	-0.277277	-0.493805	-0.350472	-0.102075	-0.434549	-0.421762	-0.132728	-0.424337	-0.417997	-0.612103	-0.1875	0.000614643	-0.325071	-0.494365
Cib	-0.101732	-0.205302	-0.0334801	-0.292929	-0.253769	-0.334048	-0.301978	-0.0976044	-0.34349	-0.30633	-0.535136	-0.122806	-0.374218	-0.553945	-0.392978	-0.482468	-0.411048	-0.31565	-0.466413	-0.0800689	-0.357396	-0.152461	-0.641813	-0.142258	-0.90821	-0.405971	-0.395509	-0.530998	-0.669242	-0.452395	-0.535826	-0.61669	-0.414589	-0.407249	-0.636083	-0.308209	-0.514843	-0.513972	-0.901733	-0.355963	-0.388743	-0.454638	-0.529752	-0.503138	-0.180064	-0.0897685	-0.378591	-0.360355
Cpy	NA	NA	-0.264006	NA	NA	NA	NA	-0.264006	0.411533	0.489571	NA	-0.349158	NA	NA	NA	NA	NA	NA	-0.250981	-0.413804	0.379129	-0.0533722	-0.189112	-0.322368	NA	0.385871	NA	-0.429062	-0.186666	-0.214517	-0.246931	0.366519	NA	NA	NA	-0.482959	-0.0386437	-0.082412	0.365511	0.397905	0.104875	-0.148005	0.328302	-0.0928101	0.0187772	0.100354	-0.119146	-0.0557876
Oam	0.252669	-0.0764814	-0.124367	0.00328788	-0.266263	-0.0170171	0.172316	0.0946732	-0.250454	-0.189492	0.0235657	0.411993	0.127114	-0.137394	-0.320645	-0.323353	-0.317174	-0.133556	-0.144024	-0.293894	-0.225847	-0.207318	-0.20205	0.281196	0.0369805	0.172538	-0.129706	0.184067	-0.0213083	-0.280289	-0.279915	-0.00316174	-0.0478956	-0.115546	0.138564	0.282712	0.415746	0.334915	0.46698	0.371423	0.365267	0.313006	0.762962	-0.405165	0.377723	0.541029	0.313441	0.549545
P VALUES							P VALUES
###	V1	V2	V3	V4	V5	V6	V7	V8	V9	V10	V11	V12	V17	V18	V19	V20	V21	V22	V23	V24	V25	V26	V27	V28	V33	V34	V35	V36	V37	V38	V39	V40	V41	V42	V43	V44	V49	V50	V51	V52	V53	V54	V55	V56	V57	V58	V59	V60
Aal	0.265081	0.265081	0.265081	0.475998	0.363302	0.363302	0.284858	0.214753	0.607139	0.269896	0.202577	0.215643	0.5507	0.799235	0.799235	0.799235	0.996115	0.730241	0.781301	0.647634	0.868347	0.872351	0.615732	0.363607	0.683164	0.900198	0.799252	0.986184	0.802847	0.981106	0.972627	0.327259	0.489774	0.925534	0.840367	0.280833	0.858487	0.867686	0.58336	0.58336	0.794506	0.976837	0.886307	0.815102	0.8965	0.940482	0.95052	0.688986
Gpy	0.227939	0.440416	0.646884	0.588246	0.584784	0.648451	0.57012	0.785414	0.814877	0.783944	0.684057	0.599527	0.101774	0.234639	0.207131	0.274098	0.545926	0.79044	0.952844	0.771691	0.448868	0.856039	0.947507	0.750713	0.00979652	0.0397413	0.0493695	0.180048	0.0762062	0.0626147	0.24734	0.445311	0.335171	0.498147	0.424172	0.666259	0.00113238	0.00448315	0.00827363	0.00749353	0.0519409	0.024214	0.169095	0.1213	0.10061	0.362929	0.349354	0.486038
Lti	NA	NA	NA	NA	NA	NA	NA	NA	NA	NA	NA	NA	NA	NA	NA	NA	NA	NA	NA	NA	NA	NA	NA	NA	NA	NA	NA	NA	NA	NA	NA	NA	NA	NA	NA	NA	NA	NA	NA	NA	NA	NA	NA	NA	NA	NA	NA	NA
Sci	NA	NA	NA	NA	NA	NA	NA	NA	NA	NA	NA	NA	NA	NA	NA	NA	NA	NA	NA	NA	NA	NA	NA	NA	NA	NA	NA	NA	NA	NA	NA	NA	NA	NA	NA	NA	NA	NA	NA	NA	NA	NA	NA	NA	NA	NA	NA	NA
Pvo	0.0654192	0.0602231	0.065011	0.197671	0.217387	0.193113	0.348846	0.172417	NA	NA	NA	NA	0.0251045	0.0188742	0.0253824	0.109176	0.0489363	0.104189	0.136076	0.136076	NA	NA	NA	NA	0.0194303	0.0266323	0.0357014	0.135136	0.0403794	0.0465505	0.0483108	0.0483108	NA	NA	NA	NA	0.112393	0.112393	0.112393	0.139815	0.0855226	0.0331191	0.0976364	0.208469	NA	NA	NA	NA
Cfi	NA	NA	0.822636	0.232657	NA	0.103038	0.206764	0.229198	NA	NA	0.549095	0.00140821	NA	0.439847	0.255608	0.590067	NA	0.103038	0.681561	0.551031	NA	NA	0.118631	0.000985938	NA	0.439847	0.363089	0.741359	NA	0.103038	0.773512	0.710329	NA	NA	0.118631	0.00248436	NA	0.626438	0.073544	0.261047	NA	0.337022	0.82454	0.879752	NA	NA	0.376027	0.0283406
Ccr	NA	NA	NA	NA	NA	NA	NA	NA	NA	NA	NA	NA	NA	NA	NA	NA	NA	NA	NA	NA	NA	NA	NA	NA	NA	NA	NA	NA	NA	NA	NA	NA	NA	NA	NA	NA	NA	NA	NA	NA	NA	NA	NA	NA	NA	NA	NA	NA
Mca	0.171429	0.303105	0.239383	0.259222	0.281747	0.359962	0.136908	0.307741	0.686031	0.27689	0.540264	0.781668	0.269393	0.461505	0.430773	0.589394	0.365753	0.520352	0.214928	0.566494	0.817995	0.846264	0.634049	0.578381	0.100877	0.241467	0.221925	0.231349	0.270928	0.372123	0.115642	0.25869	0.554294	0.621412	0.874084	0.661261	0.125502	0.232668	0.160746	0.215608	0.603807	0.313037	0.105553	0.182782	0.991017	0.208877	0.508223	0.686622
Mav	NA	NA	NA	NA	NA	NA	NA	NA	NA	NA	NA	NA	NA	NA	NA	NA	NA	NA	NA	NA	NA	NA	NA	NA	NA	NA	NA	NA	NA	NA	NA	NA	NA	NA	NA	NA	NA	NA	NA	NA	NA	NA	NA	NA	NA	NA	NA	NA
Dni	0.000827197	0.0153353	0.0772456	0.0428609	0.00577848	0.0374461	0.16751	0.0457678	0.052709	0.0646828	0.0322838	0.0311204	0.00432164	0.0338756	0.0678534	0.0119758	0.0552089	0.181772	0.26685	0.0952738	0.168527	0.323407	0.328046	0.079539	0.0153933	0.0347394	0.0313249	0.00472741	0.0433181	0.261207	0.409674	0.106164	0.169967	0.410626	0.319001	0.102317	0.0124472	0.00946741	0.0265125	0.00207362	0.0385851	0.0406101	0.128248	0.0217327	0.0321729	0.0707986	0.0527342	0.0145189
Sbe	NA	NA	NA	NA	NA	NA	NA	NA	NA	NA	NA	NA	NA	NA	NA	NA	NA	NA	NA	NA	NA	NA	NA	NA	NA	NA	NA	NA	NA	NA	NA	NA	NA	NA	NA	NA	NA	NA	NA	NA	NA	NA	NA	NA	NA	NA	NA	NA
Hcr	0.191584	0.154609	0.0656514	0.156779	0.215934	0.105517	0.107	0.314582	0.135979	0.297467	0.30034	0.126847	0.138634	0.090925	0.0772335	0.0666672	0.156348	0.177686	0.137026	0.176999	0.0645092	0.162618	0.051022	0.109826	0.0741599	0.0773526	0.0652392	0.318245	0.0559096	0.218012	0.193845	0.540858	0.053418	0.122452	0.0344741	0.175158	0.200683	0.128719	0.165407	0.361178	0.188565	0.10793	0.17	0.402985	0.0271676	0.0741485	0.0349656	0.0766431
Cau	NA	NA	NA	NA	NA	NA	NA	NA	NA	NA	NA	NA	NA	NA	NA	NA	NA	NA	NA	NA	NA	NA	NA	NA	NA	NA	NA	NA	NA	NA	NA	NA	NA	NA	NA	NA	NA	NA	NA	NA	NA	NA	NA	NA	NA	NA	NA	NA
Clu	0.0944407	NA	NA	NA	0.0254445	NA	0.511655	0.982506	0.0554157	0.058238	0.0662898	NA	0.0183282	0.211523	0.209917	0.381806	0.093838	0.0706655	0.459544	0.906803	0.0652684	0.085081	0.114476	0.0689843	0.0438053	NA	0.273243	NA	0.0368386	0.0542239	0.50955	0.668306	0.0554094	0.0598479	0.0617966	NA	0.972317	0.757458	0.407802	0.633785	0.0848341	0.382086	0.3296	0.993051	0.0474188	0.0511764	0.0425491	NA
Ala	0.87324	NA	NA	NA	0.845459	0.452091	NA	0.783449	0.739376	0.9789	0.818129	0.725409	0.744146	NA	NA	NA	0.336102	0.807904	0.253099	0.277463	0.296277	0.603595	NA	0.691363	0.821302	0.800838	NA	0.638592	0.352733	0.14793	0.490025	NA	0.792978	0.662971	0.914559	0.114343	0.619839	NA	NA	NA	0.24996	0.117493	NA	NA	0.609664	1	0.755474	0.302091
Uar	NA	0.318432	0.74071	0.380108	NA	NA	0.815201	0.196453	NA	NA	0.158115	0.0417239	NA	0.889991	0.263914	0.337055	NA	NA	0.651433	0.352214	NA	NA	0.77757	0.0225049	NA	0.746492	0.500234	0.330215	NA	NA	0.966738	0.296139	NA	NA	0.193021	0.0225049	NA	0.947891	0.610118	0.386114	NA	NA	0.966738	0.387359	NA	NA	0.0869079	0.0417239
Mlu	0.764361	0.502963	0.0921623	0.700255	0.825976	0.776159	0.507209	0.732999	0.437136	0.975719	0.314793	0.13819	0.367589	0.197858	0.0734176	0.0233797	1	0.882525	0.707287	0.882885	0.488769	0.519097	0.416943	0.105941	0.581251	0.124224	0.0481973	0.133996	0.682243	0.365789	0.497468	0.626006	0.198541	0.49871	0.939514	1	0.291357	0.0273362	0.0457258	0.629679	0.795503	0.569829	0.273755	0.968828	0.308312	0.501383	0.539732	0.355923
Mpu	NA	NA	NA	NA	NA	NA	NA	NA	NA	NA	NA	NA	NA	NA	NA	NA	NA	NA	NA	NA	NA	NA	NA	NA	NA	NA	NA	NA	NA	NA	NA	NA	NA	NA	NA	NA	NA	NA	NA	NA	NA	NA	NA	NA	NA	NA	NA	NA
Mma	NA	NA	NA	NA	NA	NA	NA	NA	NA	NA	NA	NA	NA	NA	NA	NA	NA	NA	NA	NA	NA	NA	NA	NA	NA	NA	NA	NA	NA	NA	NA	NA	NA	NA	NA	NA	NA	NA	NA	NA	NA	NA	NA	NA	NA	NA	NA	NA
Ggu	0.453796	0.918813	NA	NA	0.468143	0.979673	0.663637	0.300654	0.712301	0.699289	0.948652	0.349517	0.911235	0.286547	0.111391	0.286547	0.63257	0.785424	0.503186	0.755333	0.483176	0.922022	0.492232	0.460894	0.661045	NA	NA	NA	0.792015	0.651188	NA	NA	0.729663	0.696528	0.612597	1	0.923677	0.490583	NA	0.0557168	0.861172	0.712547	0.332502	0.332502	0.174635	0.0862389	0.0819509	0.806695
Llu	0.110418	0.0525285	0.0286572	0.0469929	0.104821	0.13278	0.0775412	0.125609	0.16454	0.201967	0.155709	0.135612	0.035204	0.0882898	0.0535429	0.0671779	0.0605398	0.066068	0.103309	0.135285	0.0648285	0.0732211	0.129675	0.154834	0.041553	0.081138	0.100437	0.212814	0.0516322	0.125654	0.108485	0.306181	0.109441	0.0854471	0.235916	0.162503	0.0235752	0.0350417	0.0565344	0.119727	0.0612216	0.0442158	0.0406998	0.172589	0.0872235	0.0618013	0.0882366	0.0668527
Fsi	1.16424e-07	9.44491e-05	0.00732849	0.634641	0.00692741	0.0314049	0.00242599	0.0178394	0.000517232	0.0011088	0.00818641	0.00319749	4.13538e-08	4.92224e-05	0.0494696	0.682438	0.00581995	0.0207075	0.00172783	0.000864955	0.00109092	0.00612933	0.133205	0.092592	1.72564e-06	0.000297477	0.0822445	0.698811	0.022896	0.0114743	0.00402606	0.0452361	0.116459	0.27249	0.421604	0.297317	5.35299e-05	0.00101411	0.0927922	0.615544	0.0384003	0.0953954	0.245244	0.329417	0.252954	0.111146	0.170719	0.230764
Lly	NA	NA	NA	NA	NA	NA	NA	NA	NA	NA	NA	NA	NA	NA	NA	NA	NA	NA	NA	NA	NA	NA	NA	NA	NA	NA	NA	NA	NA	NA	NA	NA	NA	NA	NA	NA	NA	NA	NA	NA	NA	NA	NA	NA	NA	NA	NA	NA
Lpa	NA	NA	0.154991	0.179332	0.836954	0.0106456	0.106637	0.00259308	0.440618	NA	NA	NA	NA	NA	NA	NA	0.21085	NA	NA	NA	0.390387	NA	NA	NA	NA	NA	NA	NA	NA	NA	NA	NA	0.332942	NA	NA	NA	NA	NA	NA	NA	0.0745316	NA	NA	NA	0.379589	0.000537515	0.196317	NA
Hic	0.642439	0.558943	0.504349	NA	0.703664	0.387508	0.298177	0.757278	0.404712	NA	0.428477	NA	0.801725	NA	0.86706	0.650776	NA	0.0711623	0.501719	0.624278	0.974664	0.485895	0.584275	0.894716	0.785144	0.409683	0.839241	0.451907	0.241431	NA	0.97464	0.435419	0.540291	0.968938	0.497192	0.165205	0.714413	NA	NA	NA	0.812233	0.691509	0.550801	0.625006	0.400475	0.291113	0.415217	0.188453
Gge	0.985488	0.499361	0.599144	0.761838	0.207581	0.821372	0.85079	0.305854	0.307006	0.219961	0.208231	0.0480581	NA	0.955811	0.618913	0.963987	NA	0.507287	0.882302	0.0847955	0.102009	0.252782	0.0533217	0.00531232	0.533035	0.674215	0.615779	0.983915	NA	0.219102	0.858075	0.423322	0.130589	0.231599	0.450172	0.0780049	0.400296	0.386134	0.880317	0.296612	0.402873	0.988725	0.480741	0.0925824	0.711103	0.692536	0.647954	0.102631
Rru	0.00734486	0.0371305	0.0423811	0.407632	0.00452648	0.0104641	0.102677	0.0259955	0.0635531	0.0144535	0.0158917	0.0628254	0.0198591	0.224607	0.232563	0.126848	0.00817699	0.0349899	0.168286	0.0273146	0.0551177	0.0865169	0.17917	0.0470699	0.0107873	0.579375	0.560179	0.00750632	0.0805525	0.033755	0.058821	0.0400158	0.332274	0.028199	0.0756993	0.100316	0.0115307	0.304014	0.0844706	0.111196	0.234224	0.0214019	0.0450969	0.00209451	0.282217	0.144063	0.0254101	0.0820797
Cib	0.83405	0.387786	0.963439	0.415667	0.498904	0.293905	0.8827	0.94413	0.127374	0.168983	0.0548045	0.699607	0.101421	0.159931	0.945381	0.749976	0.102954	0.534206	0.592265	0.187733	0.0458452	0.755198	0.0658304	0.224732	0.00848133	0.442693	0.443602	0.219007	0.0131517	0.213071	0.143533	0.114225	0.0930668	0.539722	0.051413	0.592223	0.456029	0.178466	0.00875304	0.972541	0.310465	0.196221	0.105576	0.278867	0.966346	0.589942	0.590314	0.343354
Cpy	NA	NA	0.487959	NA	NA	NA	0.491064	0.487959	0.54356	0.258071	NA	0.734776	NA	NA	NA	NA	NA	NA	0.902666	0.514333	0.638622	0.961225	0.59074	0.243915	NA	0.918896	NA	0.0754959	0.862231	1	0.787595	0.853937	NA	NA	NA	0.373629	0.847542	0.965803	0.698087	0.602449	0.564537	0.247315	0.656562	0.713414	0.640472	0.881136	0.692435	0.902205
Oam	0.174056	0.233798	0.17677	0.901112	0.972502	0.241237	0.0662153	0.97628	0.611628	0.567186	0.557779	0.150105	0.251477	0.743093	0.656694	0.885377	0.118093	0.324429	0.491186	0.0764058	0.690535	0.754832	0.672467	0.420332	0.344339	0.0990607	0.65316	0.382427	0.308267	0.3416	0.862413	0.758149	0.162604	0.326387	0.810817	0.722691	0.0336418	0.188296	0.11731	0.548385	0.0653733	0.0230567	0.0330296	0.363677	0.0325863	0.0598903	0.46729	0.0239872

## Sheet: N2K
	Baseline												2020												2050												2080
	RCP 8.5				RCP 6.0				RCP 4.5				RCP 8.5				RCP 6.0				RCP 4.5				RCP 8.5				RCP 6.0				RCP 4.5				RCP 8.5				RCP 6.0				RCP 4.5
###	D1	D2	D3	D4	D1	D2	D3	D4	D1	D2	D3	D4	D1	D2	D3	D4	D1	D2	D3	D4	D1	D2	D3	D4	D1	D2	D3	D4	D1	D2	D3	D4	D1	D2	D3	D4	D1	D2	D3	D4	D1	D2	D3	D4	D1	D2	D3	D4
Aal	-0.00445252	-0.00445252	-0.00445252	-0.0486006	-0.0413681	-0.0413681	0.00167971	0.0494647	-0.0651649	0.0789752	0.0438728	0.115902	0.179428	0.154323	0.154323	0.154323	0.156584	0.130944	0.170668	0.149053	0.0469968	0.0862055	0.134233	0.183187	0.181097	0.272712	0.331488	0.372678	0.148549	0.23063	0.227274	0.143472	0.101951	0.149546	0.0116011	-0.0119791	0.16793	0.170104	0.181918	0.219901	0.0813718	0.145232	0.1832	0.337492	0.0366416	0.0960388	0.0930626	0.126084
Gpy	-0.057482	-0.0500375	-0.0382562	0.0128935	-0.104389	-0.131168	-0.111866	-0.097299	-0.0484969	-0.106248	-0.123265	-0.0463684	-0.0112248	-0.0118192	0.0510128	0.0434996	-0.0481764	-0.0808659	-0.0451103	-0.0126647	0.0379193	-0.0530143	-0.0192279	-0.0309361	0.127383	0.131744	0.184016	0.194011	0.0567483	0.0468242	0.103125	0.100214	0.0666044	0.0291071	0.099014	0.145024	0.261423	0.216262	0.327263	0.370552	0.16617	0.144936	0.226158	0.250864	0.138795	0.0852742	0.134241	0.193096
Lti	NA	NA	NA	NA	NA	NA	NA	NA	NA	NA	NA	NA	NA	NA	NA	NA	NA	NA	NA	NA	NA	NA	NA	NA	NA	NA	NA	NA	NA	NA	NA	NA	NA	NA	NA	NA	NA	NA	NA	NA	NA	NA	NA	NA	NA	NA	NA	NA
Sci	NA	NA	NA	NA	NA	NA	NA	NA	NA	NA	NA	NA	NA	NA	NA	NA	NA	NA	NA	NA	NA	NA	NA	NA	NA	NA	NA	NA	NA	NA	NA	NA	NA	NA	NA	NA	NA	NA	NA	NA	NA	NA	NA	NA	NA	NA	NA	NA
Pvo	-0.22882	-0.230038	-0.229419	-0.204146	-0.240395	-0.248071	-0.256651	-0.286192	NA	NA	NA	NA	-0.250738	-0.250374	-0.237905	-0.215355	-0.195014	-0.208454	-0.209834	-0.209834	NA	NA	NA	NA	-0.287502	-0.271714	-0.259166	-0.237749	-0.220125	-0.21343	-0.220309	-0.220309	NA	NA	NA	NA	-0.234329	-0.234329	-0.234329	-0.247975	-0.151931	-0.174376	-0.16383	-0.140097	NA	NA	NA	NA
Cfi	NA	NA	-0.247383	-0.172572	NA	NA	-0.139932	-0.225045	NA	NA	0.408541	0.385111	NA	-0.131918	-0.0746412	-0.193249	NA	NA	-0.188116	-0.27573	NA	NA	0.444412	0.495194	NA	-0.131918	-0.0806272	-0.199393	NA	NA	-0.191763	-0.21466	NA	NA	0.444412	0.473271	NA	0.206154	0.0487816	-0.116387	NA	NA	-0.154837	-0.114307	NA	NA	0.271439	0.379383
Ccr	NA	NA	NA	NA	NA	NA	NA	NA	NA	NA	NA	NA	NA	NA	NA	NA	NA	NA	NA	NA	NA	NA	NA	NA	NA	NA	NA	NA	NA	NA	NA	NA	NA	NA	NA	NA	NA	NA	NA	NA	NA	NA	NA	NA	NA	NA	NA	NA
Mca	0.281786	0.230509	0.221519	0.234509	0.21151	0.269863	0.284643	0.294783	0.278983	0.285717	0.271314	0.311897	0.260619	0.22055	0.261806	0.349469	0.220008	0.301421	0.28932	0.41293	0.241883	0.265251	0.32029	0.316732	0.202715	0.251468	0.304832	0.308174	0.223567	0.272204	0.218418	0.233291	0.273866	0.28879	0.294177	0.27432	0.249187	0.190325	0.184048	0.277855	0.111673	0.17626	0.125172	0.231558	0.214384	0.193088	0.229995	0.278592
Mav	NA	NA	NA	NA	NA	NA	NA	NA	NA	NA	NA	NA	NA	NA	NA	NA	NA	NA	NA	NA	NA	NA	NA	NA	NA	NA	NA	NA	NA	NA	NA	NA	NA	NA	NA	NA	NA	NA	NA	NA	NA	NA	NA	NA	NA	NA	NA	NA
Dni	-0.34632	-0.386314	-0.35534	-0.318053	-0.312086	-0.267855	-0.314249	-0.252317	-0.21309	-0.132175	-0.109563	-0.0830489	-0.325141	-0.337905	-0.325784	-0.322403	-0.253792	-0.126368	-0.159391	-0.118732	-0.189531	-0.0570763	-0.0457206	-0.0554415	-0.346484	-0.351384	-0.332237	-0.328515	-0.245889	-0.170051	-0.2059	-0.142751	-0.134062	-0.0555831	-0.0618315	-0.0303225	-0.359124	-0.376323	-0.332523	-0.29873	-0.267315	-0.180938	-0.223187	-0.161362	-0.19363	-0.132245	-0.117811	-0.127433
Sbe	NA	NA	NA	NA	NA	NA	NA	NA	NA	NA	NA	NA	NA	NA	NA	NA	NA	NA	NA	NA	NA	NA	NA	NA	NA	NA	NA	NA	NA	NA	NA	NA	NA	NA	NA	NA	NA	NA	NA	NA	NA	NA	NA	NA	NA	NA	NA	NA
Hcr	-0.113653	-0.0788051	-0.0605238	-0.0908268	-0.11513	-0.0726589	-0.0237262	-0.0154626	-0.135632	-0.104664	-0.051506	-0.0801432	-0.144377	-0.116997	-0.0987885	-0.111022	-0.155136	-0.0944922	-0.0567972	-0.0570829	-0.170489	-0.136702	-0.138687	-0.12635	-0.168882	-0.165225	-0.133925	-0.137088	-0.163806	-0.122189	-0.0615344	-0.0653687	-0.191071	-0.183725	-0.166316	-0.120416	-0.172687	-0.100406	-0.0716572	-0.0906065	-0.165806	-0.0934949	-0.0895625	-0.0790975	-0.165178	-0.173447	-0.141824	-0.152215
Cau	NA	NA	NA	NA	NA	NA	NA	NA	NA	NA	NA	NA	NA	NA	NA	NA	NA	NA	NA	NA	NA	NA	NA	NA	NA	NA	NA	NA	NA	NA	NA	NA	NA	NA	NA	NA	NA	NA	NA	NA	NA	NA	NA	NA	NA	NA	NA	NA
Clu	0.163227	0.134557	0.0417127	0.409904	0.225612	0.26857	0.246354	0.230906	0.0163564	-0.0111883	0.0490562	0.149607	0.222245	0.07224	-0.0014673	0.248766	0.156742	0.181819	0.190956	0.194104	0.0115739	-0.0268881	0.0445348	0.121408	0.183161	0.1148	-0.110633	0.23586	0.223155	0.290234	0.271818	0.30314	0.0231305	-0.00682782	0.0634967	0.164227	-0.23307	-0.197814	-0.143486	-0.122795	0.231043	0.279401	0.279478	0.154483	0.030249	0.0015679	0.0883259	0.184153
Ala	NA	NA	NA	NA	0.0679848	NA	NA	NA	NA	NA	0.119018	0.117834	NA	NA	NA	NA	NA	NA	NA	NA	NA	NA	NA	NA	NA	NA	NA	NA	NA	NA	NA	NA	NA	NA	NA	NA	NA	NA	NA	NA	NA	NA	NA	NA	NA	NA	NA	NA
Uar	NA	-0.219567	-0.0418555	-0.095736	NA	NA	-0.0510493	0.0134769	NA	NA	0.588502	0.365371	NA	-0.105016	0.0437193	-0.0437128	NA	NA	-0.20681	0.0646274	NA	NA	0.145637	0.419442	NA	-0.14419	0.0346053	0.00859964	NA	NA	-0.120933	0.147235	NA	NA	0.405404	0.419442	NA	-0.0553165	0.00790925	0.0455058	NA	NA	-0.120933	0.00912451	NA	NA	0.303577	0.365371
Mlu	-0.176153	-0.227957	-0.032474	-0.09499	-0.32299	0.102595	-0.05635	-0.220541	-0.1612	-0.126002	-0.0140386	-0.124226	0.055691	0.24921	0.437764	0.498012	0.103175	0.396518	0.139693	0.259666	0.0397474	-0.0194503	-0.0552979	-0.011827	0.0613649	0.274671	0.412188	0.248281	-0.24656	0.0259792	0.0713655	0.184775	0.106917	0.0782468	0.0824688	0.0939203	0.122936	0.386483	0.398721	0.328485	0.211511	0.349543	0.369146	0.00590807	0.162194	0.00836402	0.102208	0.115718
Mpu	NA	NA	NA	NA	NA	NA	NA	NA	NA	NA	NA	NA	NA	NA	NA	NA	NA	NA	NA	NA	NA	NA	NA	NA	NA	NA	NA	NA	NA	NA	NA	NA	NA	NA	NA	NA	NA	NA	NA	NA	NA	NA	NA	NA	NA	NA	NA	NA
Mma	NA	NA	NA	NA	NA	NA	NA	NA	NA	NA	NA	NA	NA	NA	NA	NA	NA	NA	NA	NA	NA	NA	NA	NA	NA	NA	NA	NA	NA	NA	NA	NA	NA	NA	NA	NA	NA	NA	NA	NA	NA	NA	NA	NA	NA	NA	NA	NA
Ggu	-0.365225	0.00551388	NA	NA	-0.180973	-0.0156834	-0.128174	-0.328919	0.0747351	-0.0992228	0.0407488	-0.17861	-0.100604	-0.354518	-0.603882	-0.354518	-0.145083	0.0782451	0.270174	0.133853	0.241796	0.00593441	0.217341	0.15213	NA	NA	NA	NA	-0.215282	0.195799	NA	NA	0.23068	0.0909158	0.134811	0.0625434	0.0210315	NA	NA	-1.9528	0.00804978	0.125534	NA	NA	0.68903	0.839702	0.926589	0.141228
Llu	0.437575	0.308272	0.287351	0.270119	0.464465	0.373709	0.319029	0.292686	0.513491	0.335509	0.312593	0.271057	0.35618	0.313575	0.271529	0.238166	0.451806	0.302461	0.279885	0.282882	0.452268	0.294978	0.261573	0.243059	0.39756	0.318749	0.280225	0.259893	0.408604	0.321751	0.282943	0.286173	0.454896	0.33608	0.310169	0.244514	0.367746	0.313829	0.334211	0.318595	0.395267	0.301916	0.323334	0.324268	0.415778	0.274077	0.311546	0.249093
Fsi	0.291365	0.234878	0.298858	-0.0119319	-0.0274803	0.0746851	0.0989997	0.0770478	-0.011044	0.0701717	0.00425297	0.171866	0.375426	0.208429	0.134567	-0.0494205	0.0610462	-0.0908814	-0.04683	0.151076	-0.135252	-0.0247873	-0.179313	-0.0978421	0.262361	0.376912	0.156116	-0.233495	0.072275	0.0597777	0.101623	0.124363	-0.0678839	-0.0917285	-0.114043	-0.063001	0.358949	0.310035	0.184676	-0.147659	0.210197	0.238102	0.129983	0.10134	0.00797552	-0.0609804	-0.0493452	-0.00923086
Lly	NA	NA	NA	NA	NA	NA	NA	NA	NA	NA	NA	NA	NA	NA	NA	NA	NA	NA	NA	NA	NA	NA	NA	NA	NA	NA	NA	NA	NA	NA	NA	NA	NA	NA	NA	NA	NA	NA	NA	NA	NA	NA	NA	NA	NA	NA	NA	NA
Lpa	0.324471	0.70348	-0.155238	0.0244935	0.403501	0.129142	0.902589	NA	0.179257	NA	NA	0.784808	0.0896732	0.25327	0.735816	0.105649	0.782807	0.541489	0.558698	NA	0.317091	0.558018	0.613801	0.79754	0.309096	NA	NA	NA	0.319835	0.0791132	0.295676	2.41061	-0.0639998	-0.187747	0.151648	1.41514	NA	NA	NA	NA	0.224522	0.0956265	0.182865	0.96659	0.256276	NA	0.177263	0.926431
Hic	0.0650616	0.253102	0.136955	0.0913737	0.0461851	0.22286	0.334352	0.399096	0.230067	0.10427	0.336055	0.712795	-0.0463739	-0.172566	-0.0796529	-0.176728	-0.212	-0.492674	-0.265978	-0.0692581	0.0164666	-0.432071	-0.255477	-0.172544	3.22653e-05	-0.0470893	-0.0669889	-0.0365107	-0.129076	-0.0315535	-0.104827	0.0880856	-0.0876885	-0.0349501	-0.14597	-0.351349	0.355394	0.229612	0.161591	0.233605	-0.0707908	0.251122	0.186136	0.199727	0.0513199	0.231918	0.165536	0.224981
Gge	0.445788	0.502753	0.563083	0.450996	0.407017	0.480172	0.497504	0.326711	0.50146	0.533897	0.314999	0.299315	0.354939	0.487808	0.49395	0.322652	0.321675	0.448774	0.503741	0.408635	0.496827	0.56056	0.377164	0.234392	0.449762	0.454432	0.432368	0.250547	0.298172	0.418688	0.424985	0.428556	0.416856	0.454458	0.340017	0.372368	0.104028	0.037705	0.122149	0.337475	0.0694729	0.24565	0.335014	0.391877	0.0716433	-0.0290446	0.187298	0.256232
Rru	-0.493148	-0.452626	-0.393362	-0.70728	-0.304401	0.122143	-0.0721198	-0.328962	-0.385183	-0.275507	-0.036276	-0.139747	-0.565856	-0.500133	-0.356245	-0.766706	-0.273318	0.372367	-0.110756	-0.130101	-0.388529	-0.204541	0.18056	-0.107612	-0.516129	-0.528858	-0.191102	-0.572359	-0.19796	0.450581	-0.116354	-0.171977	-0.347326	-0.167776	-0.118047	-0.369204	-0.449472	-0.49707	-0.271912	-0.341627	-0.120458	0.154891	0.0554846	-0.518633	-0.258155	-0.184116	0.0473317	-0.295999
Cib	-0.518826	-0.244996	-0.29569	-0.33996	-0.214542	0.0394805	0.0863108	0.0374022	-0.179096	0.0425884	-0.350596	-0.0685858	-0.674133	-0.284001	-0.349616	-0.736093	-0.37309	-0.229756	-0.0412046	-0.0346395	-0.467948	-0.251828	-0.312549	-0.13075	-0.760195	-0.55115	-0.463183	-0.297059	-0.632569	-0.410314	-0.461212	-0.269376	-0.359917	-0.364614	-0.564134	-0.419161	-0.614019	-0.507814	-0.748617	-0.228766	-0.438813	-0.582432	-0.619229	-0.375085	-0.165044	-0.0394771	-0.339959	-0.431746
Cpy	-1.46037	NA	-0.616546	0.070396	-0.178594	-0.396195	NA	-0.0756328	0.204496	-0.199506	-0.16513	-0.478364	-0.723596	-0.339966	-0.823289	NA	-0.238254	-0.37141	-0.38856	-0.320154	0.357595	0.232024	0.0548004	-0.0343192	-0.43452	0.374536	NA	-0.748977	-0.401721	-1.43684	-0.341854	0.228884	0.288254	0.0174665	0.250862	0.0693886	-0.126922	-0.192103	0.483707	0.861134	0.642857	0.443437	1.00619	0.417752	0.0938013	0.189453	0.152394	0.193678
Oam	-0.159806	0.182357	0.00940267	-0.032027	-0.198959	-0.198186	-0.197347	0.018385	-0.422149	-0.427995	-0.0645556	0.0845385	-0.0115747	0.14611	0.39799	0.625429	0.00893897	-0.0542087	-0.242677	-0.0118221	0.0328947	-0.0266779	-0.197885	-0.0392674	-0.083207	-0.250103	-0.0790828	0.552828	-0.176734	-0.070352	-0.268041	-0.377829	0.0998176	-0.0751295	-0.0827692	0.0371029	0.277346	0.452335	0.629594	-0.0803754	0.31041	0.537254	0.0894128	-0.110939	0.152142	0.0639632	0.0288398	0.33952
P VALUES
###	V1	V2	V3	V4	V5	V6	V7	V8	V9	V10	V11	V12	V17	V18	V19	V20	V21	V22	V23	V24	V25	V26	V27	V28	V33	V34	V35	V36	V37	V38	V39	V40	V41	V42	V43	V44	V49	V50	V51	V52	V53	V54	V55	V56	V57	V58	V59	V60
Aal	0.324381	0.324381	0.324381	0.197637	0.190899	0.190899	0.34105	0.564399	0.156925	0.734511	0.554126	0.952579	0.615478	0.775282	0.775282	0.775282	0.848633	0.977228	0.756882	0.732411	0.64502	0.837732	0.80664	0.628185	0.607542	0.271678	0.133265	0.0864682	0.81954	0.439707	0.453361	0.847599	0.895207	0.796624	0.535561	0.370961	0.732972	0.72778	0.671395	0.404479	0.695304	0.91025	0.656131	0.129418	0.367769	0.705461	0.698414	0.985924
Gpy	0.646841	0.707325	0.575437	0.909526	0.421811	0.19221	0.24345	0.468935	0.421043	0.221265	0.0518251	0.350914	0.874661	0.850343	0.871346	0.884267	0.740848	0.299744	0.492018	0.624499	0.825871	0.447923	0.427541	0.385962	0.259836	0.225235	0.208603	0.178987	0.524892	0.747058	0.562303	0.703877	0.929828	0.898244	0.794843	0.734068	0.0110126	0.0883403	0.00948386	0.0050481	0.0938718	0.184523	0.084793	0.0773768	0.274536	0.302794	0.312393	0.192958
Lti	NA	NA	NA	NA	NA	NA	NA	NA	NA	NA	NA	NA	NA	NA	NA	NA	NA	NA	NA	NA	NA	NA	NA	NA	NA	NA	NA	NA	NA	NA	NA	NA	NA	NA	NA	NA	NA	NA	NA	NA	NA	NA	NA	NA	NA	NA	NA	NA
Sci	NA	NA	NA	NA	NA	NA	NA	NA	NA	NA	NA	NA	NA	NA	NA	NA	NA	NA	NA	NA	NA	NA	NA	NA	NA	NA	NA	NA	NA	NA	NA	NA	NA	NA	NA	NA	NA	NA	NA	NA	NA	NA	NA	NA	NA	NA	NA	NA
Pvo	0.0749201	0.0875974	0.0758286	0.200403	0.0371416	0.0255648	0.0259278	0.0125114	NA	NA	NA	NA	0.106964	0.17005	0.201132	0.341287	0.140436	0.0884103	0.0701112	0.0701112	NA	NA	NA	NA	0.139782	0.175528	0.144276	0.249942	0.046049	0.0633585	0.050767	0.050767	NA	NA	NA	NA	0.539508	0.539508	0.539508	0.46892	0.151342	0.0919233	0.128846	0.205354	NA	NA	NA	NA
Cfi	NA	NA	0.566575	0.802478	NA	0.110445	0.512399	0.826998	NA	NA	0.191107	0.00143028	NA	0.387697	0.906643	0.744065	NA	0.110445	0.930908	0.757765	NA	NA	0.0355832	0.000209159	NA	0.387697	0.732445	0.631792	NA	0.110445	0.714181	0.664426	NA	NA	0.0355832	0.00061822	NA	0.650124	0.13557	0.922108	NA	0.388917	0.815	0.967586	NA	NA	0.0635949	0.00653077
Ccr	NA	NA	NA	NA	NA	NA	NA	NA	NA	NA	NA	NA	NA	NA	NA	NA	NA	NA	NA	NA	NA	NA	NA	NA	NA	NA	NA	NA	NA	NA	NA	NA	NA	NA	NA	NA	NA	NA	NA	NA	NA	NA	NA	NA	NA	NA	NA	NA
Mca	0.0164537	0.0390152	0.116453	0.202727	0.035831	0.0190382	0.0127571	0.0672617	0.0126436	0.0221363	0.039943	0.0333938	0.0134385	0.0315029	0.0296924	0.0177878	0.0126973	0.00292631	0.0114404	0.00526773	0.0086539	0.00784908	0.00648571	0.00798679	0.0264722	0.00950833	0.00612306	0.0200144	0.0165054	0.0125319	0.0589258	0.0844309	0.00362456	0.00920448	0.0089725	0.0228624	0.0145235	0.0508123	0.105892	0.0402988	0.10592	0.0705269	0.200123	0.0651674	0.0170004	0.0611366	0.0461518	0.0237949
Mav	NA	NA	NA	NA	NA	NA	NA	NA	NA	NA	NA	NA	NA	NA	NA	NA	NA	NA	NA	NA	NA	NA	NA	NA	NA	NA	NA	NA	NA	NA	NA	NA	NA	NA	NA	NA	NA	NA	NA	NA	NA	NA	NA	NA	NA	NA	NA	NA
Dni	0.000234831	5.79708e-05	0.000441886	0.0069132	0.000282956	0.00152265	0.000275506	0.0043865	0.00612027	0.0175687	0.0296297	0.144508	0.000248552	0.00011513	0.000259542	0.000563769	0.00148884	0.0149071	0.00303781	0.019395	0.0105522	0.0705557	0.0931595	0.069425	0.000664645	6.93127e-05	0.000122588	0.000252453	0.00328432	0.0139471	0.00295984	0.0173434	0.0417802	0.128317	0.115376	0.157587	0.000201284	2.90516e-05	0.000147022	0.000910729	0.0025255	0.00384319	0.000959954	0.0148976	0.0149638	0.0208719	0.0364042	0.0280518
Sbe	NA	NA	NA	NA	NA	NA	NA	NA	NA	NA	NA	NA	NA	NA	NA	NA	NA	NA	NA	NA	NA	NA	NA	NA	NA	NA	NA	NA	NA	NA	NA	NA	NA	NA	NA	NA	NA	NA	NA	NA	NA	NA	NA	NA	NA	NA	NA	NA
Hcr	0.0187871	0.0601043	0.0906028	0.102366	0.0323751	0.0509579	0.0727638	0.335726	0.0279843	0.0651961	0.172097	0.102526	0.0116112	0.0401693	0.0540352	0.0703135	0.0136303	0.0470687	0.0597664	0.18511	0.0129527	0.0445772	0.0503373	0.108515	0.0119472	0.014928	0.0781403	0.333457	0.0336365	0.0763008	0.177596	0.665083	0.00933701	0.00847133	0.0318709	0.21281	0.0638869	0.271278	0.327795	0.535086	0.153229	0.469888	0.229101	0.767003	0.0575373	0.0449686	0.190571	0.191491
Cau	NA	NA	NA	NA	NA	NA	NA	NA	NA	NA	NA	NA	NA	NA	NA	NA	NA	NA	NA	NA	NA	NA	NA	NA	NA	NA	NA	NA	NA	NA	NA	NA	NA	NA	NA	NA	NA	NA	NA	NA	NA	NA	NA	NA	NA	NA	NA	NA
Clu	0.679874	0.362705	0.62489	0.0827632	0.812741	0.666157	0.861039	0.689564	0.745573	0.480194	0.630689	0.215704	0.212378	0.665278	0.483111	0.439554	0.838105	0.840152	0.944072	0.906804	0.607723	0.285527	0.753561	0.204541	0.208179	0.29334	0.266825	0.120414	0.621158	0.396447	0.332596	0.475671	0.627708	0.378903	0.676786	0.270746	0.856795	0.922965	0.884236	0.475253	0.449071	0.457573	0.239811	0.674804	0.563023	0.338268	0.584413	0.10244
Ala	NA	NA	NA	NA	0.177886	NA	NA	NA	NA	NA	0.365541	0.337596	NA	NA	NA	NA	NA	NA	NA	NA	NA	NA	NA	NA	NA	NA	NA	NA	NA	NA	NA	NA	NA	NA	NA	NA	NA	NA	NA	NA	NA	NA	NA	NA	NA	NA	NA	NA
Uar	NA	0.98958	0.597503	0.979673	NA	NA	0.913326	0.952704	NA	NA	0.155011	0.144928	NA	0.423509	0.183479	0.68725	NA	NA	0.516106	0.454298	NA	NA	0.602717	0.0713984	NA	0.649505	0.28637	0.456012	NA	NA	0.853132	0.202852	NA	NA	0.0712437	0.0713984	NA	0.232107	0.41461	0.350392	NA	NA	0.853132	0.57293	NA	NA	0.211212	0.144928
Mlu	0.263524	0.0656953	0.88694	0.747406	0.0239527	0.616216	0.803888	0.352111	0.604412	0.986173	0.358889	0.946333	0.644564	0.0993354	0.0838553	0.0723856	0.0996031	0.0891317	0.222134	0.514582	0.232814	0.556039	0.96927	0.795218	0.635016	0.690105	0.543772	0.660282	0.0622902	0.980453	0.574342	0.782333	0.562969	0.69522	0.508213	0.814902	0.760236	0.190635	0.199418	0.579683	0.394186	0.221845	0.261851	0.624855	0.65455	0.538691	0.978327	0.930809
Mpu	NA	NA	NA	NA	NA	NA	NA	NA	NA	NA	NA	NA	NA	NA	NA	NA	NA	NA	NA	NA	NA	NA	NA	NA	NA	NA	NA	NA	NA	NA	NA	NA	NA	NA	NA	NA	NA	NA	NA	NA	NA	NA	NA	NA	NA	NA	NA	NA
Mma	NA	NA	NA	NA	NA	NA	NA	NA	NA	NA	NA	NA	NA	NA	NA	NA	NA	NA	NA	NA	NA	NA	NA	NA	NA	NA	NA	NA	NA	NA	NA	NA	NA	NA	NA	NA	NA	NA	NA	NA	NA	NA	NA	NA	NA	NA	NA	NA
Ggu	0.453796	0.918813	NA	NA	0.468143	0.979673	0.663637	0.300654	0.712301	0.699289	0.948652	0.349517	0.911235	0.286547	0.111391	0.286547	0.63257	0.785424	0.503186	0.755333	0.483176	0.922022	0.492232	0.460894	0.661045	NA	NA	NA	0.792015	0.651188	NA	NA	0.729663	0.696528	0.612597	1	0.923677	0.490583	NA	0.0557168	0.861172	0.712547	0.332502	0.332502	0.174635	0.0862389	0.0819509	0.806695
Llu	1.25748e-05	0.00140508	0.00208846	0.00922704	2.01531e-05	0.000279419	0.00112701	0.00695023	2.14495e-06	0.0012786	0.0027471	0.0179585	0.000237459	0.00113117	0.00569608	0.0310559	3.22825e-05	0.00350149	0.00658412	0.00806896	1.68993e-05	0.0047179	0.010093	0.0274318	2.14437e-05	0.00061786	0.00156998	0.00685376	6.84685e-05	0.000963709	0.00294512	0.00380767	8.31306e-06	0.000651229	0.00138177	0.0151876	0.000100354	0.000622595	0.000144873	0.000712704	0.000118033	0.00180398	0.000467555	0.000551883	3.62448e-05	0.00517795	0.000727575	0.00984906
Fsi	0.392476	0.832925	0.461481	0.983331	0.106836	0.338642	0.707338	0.656325	0.497644	0.699353	0.570366	0.572001	0.104435	0.69767	0.965302	0.735118	0.471052	0.12354	0.343795	0.441513	0.283736	0.472572	0.239594	0.765787	0.191053	0.0537523	0.426165	0.336156	0.826779	0.990873	0.891304	0.45172	0.376954	0.255543	0.301722	0.498773	0.0289807	0.0532285	0.320211	0.763901	0.169457	0.126517	0.466593	0.414748	0.974884	0.644452	0.93662	0.79792
Lly	NA	NA	NA	NA	NA	NA	NA	NA	NA	NA	NA	NA	NA	NA	NA	NA	NA	NA	NA	NA	NA	NA	NA	NA	NA	NA	NA	NA	NA	NA	NA	NA	NA	NA	NA	NA	NA	NA	NA	NA	NA	NA	NA	NA	NA	NA	NA	NA
Lpa	0.665646	0.397842	0.365704	1	0.288735	0.981046	0.140542	0.383988	1	0.710403	NA	0.26369	0.735386	0.566815	0.476349	1	0.0464394	0.233999	0.175307	NA	0.356661	0.472001	0.671436	0.565591	0.849191	0.561658	0.484908	0.484908	0.821689	0.842097	0.266236	0.0952381	0.448569	0.550788	0.694418	0.17981	0.758889	NA	NA	0.907539	0.90667	0.806994	0.627836	0.0597495	0.829866	0.179796	0.559564	0.0832877
Hic	0.444055	0.11927	0.365219	0.606743	0.686504	0.277669	0.049871	0.10153	0.105201	0.388521	0.0367206	0.00457857	0.892278	0.909472	0.495655	0.80265	0.609964	0.0786118	0.246917	0.778638	0.433299	0.139943	0.549799	0.91319	0.983732	0.844	0.871052	0.778	0.662089	0.953656	0.852153	0.504602	0.758728	0.475957	0.818047	0.158265	0.135502	0.129464	0.164914	0.144261	0.893913	0.406206	0.189986	0.37252	0.529634	0.205399	0.400208	0.29192
Gge	0.138264	0.061141	0.0435869	0.235307	0.279771	0.0808111	0.0467499	0.776719	0.00243581	0.0110935	0.217379	0.929376	0.614285	0.10304	0.0258424	0.350404	0.789763	0.125889	0.0238736	0.448209	0.00675892	0.00371727	0.154422	0.974437	0.163046	0.136102	0.116676	0.664861	0.618942	0.20178	0.166369	0.274808	0.03297	0.0777071	0.286301	0.124036	0.954892	0.738142	0.892754	0.198404	0.638206	0.974691	0.509818	0.258594	0.0832006	0.404111	0.429075	0.521042
Rru	0.179297	0.0322134	0.0712126	0.0725101	0.039109	0.834014	0.954404	0.128442	0.0236036	0.121327	0.798069	0.345464	0.00876505	0.0370526	0.0963909	0.0574942	0.0736159	0.393725	0.859298	0.612941	0.0159342	0.404366	0.309788	0.575128	0.0796803	0.09055	0.708023	0.027844	0.417205	0.142193	0.67283	0.347409	0.0821536	0.476015	0.650377	0.670813	0.159715	0.026443	0.229886	0.0195778	0.696913	0.857607	0.956636	0.0313784	0.347932	0.460002	0.905316	0.566251
Cib	0.0044779	0.390774	0.479964	0.579269	0.292751	0.920923	0.539606	0.310894	0.711666	0.547853	0.151343	0.858734	0.00466811	0.288061	0.659593	0.0533804	0.217375	0.533048	0.918979	0.728703	0.0298403	0.624111	0.345166	0.877957	0.013415	0.0326689	0.0187093	0.24249	0.0086669	0.0639447	0.036904	0.253295	0.127847	0.444538	0.0738772	0.297823	0.166508	0.06112	0.00863422	0.565264	0.118623	0.0303446	0.0127225	0.187515	0.63331	0.866699	0.360181	0.136377
Cpy	0.0659358	NA	0.213692	0.883129	0.350569	0.369946	0.552214	0.890111	0.762528	0.331507	0.711645	0.329775	0.162526	0.660395	0.203083	0.18531	0.461186	0.36966	0.321291	0.4658	0.192925	0.471798	0.89219	0.921174	0.295109	0.390553	1	0.283032	0.197379	0.00324297	0.316668	0.537284	0.284158	0.971176	0.490695	0.648329	0.683829	0.592544	0.166187	0.0248084	0.0486274	0.056308	0.00439785	0.0909702	0.665102	0.691657	0.684566	0.604187
Oam	0.381517	0.0150631	0.0220655	0.489381	0.853237	0.920971	1	0.321236	0.565666	0.486493	0.446694	0.392076	0.422127	0.816501	0.116231	0.00291083	0.824286	0.633416	0.760771	0.690246	1	0.952299	0.31219	0.847021	0.958722	0.308953	0.784982	0.055521	0.737885	0.421094	0.263962	0.209757	0.177353	0.81701	0.355221	0.70081	0.0356755	0.0597884	0.0374953	0.974094	0.0618635	0.00554221	0.776387	0.549962	0.359979	0.393838	0.841503	0.175402

## Sheet: HII
	Baseline												2020												2050												2080
	RCP 8.5				RCP 6.0				RCP 4.5				RCP 8.5				RCP 6.0				RCP 4.5				RCP 8.5				RCP 6.0				RCP 4.5				RCP 8.5				RCP 6.0				RCP 4.5
###	D1	D2	D3	D4	D1	D2	D3	D4	D1	D2	D3	D4	D1	D2	D3	D4	D1	D2	D3	D4	D1	D2	D3	D4	D1	D2	D3	D4	D1	D2	D3	D4	D1	D2	D3	D4	D1	D2	D3	D4	D1	D2	D3	D4	D1	D2	D3	D4
Aal	-0.30222	-0.30222	-0.30222	-0.359328	-0.317445	-0.317445	-0.313163	-0.382083	-0.403536	-0.434658	-0.386086	-0.499441	-0.313829	-0.353056	-0.353056	-0.353056	-0.294748	-0.332761	-0.322252	-0.366476	-0.433349	-0.483254	-0.513999	-0.482392	-0.242156	-0.196421	-0.206311	-0.193638	-0.307449	-0.209481	-0.215551	-0.219308	-0.444394	-0.367793	-0.254398	-0.25326	-0.294802	-0.296777	-0.165547	-0.161732	-0.377226	-0.330514	-0.342517	-0.215067	-0.419813	-0.425638	-0.436297	-0.467807
Gpy	-0.298921	-0.329422	-0.2807	-0.275796	-0.244558	-0.262763	-0.178015	-0.171503	-0.222215	-0.210069	-0.164727	-0.163558	-0.361033	-0.328753	-0.395082	-0.35642	-0.339508	-0.285024	-0.324232	-0.328929	-0.313226	-0.279378	-0.269222	-0.265268	-0.412025	-0.424337	-0.40256	-0.340188	-0.408785	-0.403351	-0.412282	-0.305257	-0.391119	-0.381139	-0.376018	-0.42555	-0.485396	-0.473245	-0.49727	-0.500502	-0.442155	-0.461569	-0.450978	-0.400909	-0.445578	-0.431015	-0.490075	-0.530467
Lti	NA	NA	NA	NA	NA	NA	NA	NA	NA	NA	NA	NA	NA	NA	NA	NA	NA	NA	NA	NA	NA	NA	NA	NA	NA	NA	NA	NA	NA	NA	NA	NA	NA	NA	NA	NA	NA	NA	NA	NA	NA	NA	NA	NA	NA	NA	NA	NA
Sci	NA	NA	NA	NA	NA	NA	NA	NA	NA	NA	NA	NA	NA	NA	NA	NA	NA	NA	NA	NA	NA	NA	NA	NA	NA	NA	NA	NA	NA	NA	NA	NA	NA	NA	NA	NA	NA	NA	NA	NA	NA	NA	NA	NA	NA	NA	NA	NA
Pvo	0.00143958	0.00348099	0.000544453	-0.00651718	0.165092	0.158289	0.167691	0.182605	NA	NA	NA	NA	0.0446086	0.0458716	0.0444445	0.0393789	0.132667	0.134805	0.125397	0.125219	NA	NA	NA	NA	-0.0617011	-0.0782402	-0.0708252	-0.0768682	0.0386522	0.0457083	0.0547128	0.0544945	NA	NA	NA	NA	-0.0783052	-0.0783052	-0.109973	-0.124357	-0.00149599	0.0105432	0.00877222	0.00760151	NA	NA	NA	NA
Cfi	NA	-0.723745	-0.144187	-0.000101663	NA	-0.112633	-0.00619249	-0.0847642	NA	NA	0.25118	0.327042	NA	-0.595815	-0.0802005	-0.0442079	NA	-0.112633	-0.104899	-0.125407	NA	NA	0.51872	0.393041	NA	-0.595815	-0.0759084	-0.031961	NA	-0.112633	-0.387868	-0.369854	NA	NA	0.51872	0.391292	NA	-0.55145	-0.0965322	0.0118287	NA	-0.185194	-0.0944398	-0.0894867	NA	NA	0.762202	0.457255
Ccr	NA	NA	NA	NA	NA	NA	NA	NA	NA	NA	NA	NA	NA	NA	NA	NA	NA	NA	NA	NA	NA	NA	NA	NA	NA	NA	NA	NA	NA	NA	NA	NA	NA	NA	NA	NA	NA	NA	NA	NA	NA	NA	NA	NA	NA	NA	NA	NA
Mca	0.546238	0.612335	0.664233	0.853389	0.55121	0.580224	0.491972	0.514971	0.472561	0.467233	0.671809	0.550822	0.513379	0.532608	0.485774	0.342485	0.469436	0.453044	0.310744	0.276227	0.436433	0.407934	0.528729	0.514279	0.507299	0.460733	0.380363	0.335381	0.417278	0.453981	0.418755	0.363981	0.41898	0.36775	0.436922	0.322967	0.459337	0.553649	0.522724	0.471156	0.598156	0.588155	0.580288	0.527265	0.463321	0.453807	0.589288	0.433062
Mav	NA	NA	NA	NA	NA	NA	NA	NA	NA	NA	NA	NA	NA	NA	NA	NA	NA	NA	NA	NA	NA	NA	NA	NA	NA	NA	NA	NA	NA	NA	NA	NA	NA	NA	NA	NA	NA	NA	NA	NA	NA	NA	NA	NA	NA	NA	NA	NA
Dni	-0.358079	-0.352156	-0.321198	-0.350398	-0.429558	-0.409393	-0.39825	-0.411408	-0.464674	-0.442852	-0.456513	-0.321062	-0.385354	-0.43852	-0.414631	-0.451086	-0.464251	-0.478875	-0.457978	-0.522095	-0.511156	-0.533583	-0.512652	-0.490704	-0.38197	-0.476823	-0.461716	-0.481767	-0.477766	-0.44614	-0.406393	-0.44845	-0.50484	-0.543848	-0.413021	-0.380599	-0.372175	-0.406691	-0.399623	-0.427644	-0.408718	-0.418623	-0.378207	-0.423913	-0.449129	-0.484386	-0.395894	-0.331006
Sbe	NA	NA	NA	NA	NA	NA	NA	NA	NA	NA	NA	NA	NA	NA	NA	NA	NA	NA	NA	NA	NA	NA	NA	NA	NA	NA	NA	NA	NA	NA	NA	NA	NA	NA	NA	NA	NA	NA	NA	NA	NA	NA	NA	NA	NA	NA	NA	NA
Hcr	0.409283	0.308511	0.209218	0.131591	0.35662	0.232735	0.161197	0.127822	0.34268	0.201745	0.241436	0.166177	0.247628	0.0968751	0.0616104	0.027347	0.234216	0.126246	0.0464436	0.0154709	0.21776	0.104543	0.0589249	-0.0167819	0.112254	0.0370139	-0.0258406	-0.245596	0.113468	0.0279864	-0.0956588	-0.276174	0.127344	0.0703697	0.00119848	-0.201069	0.026441	-0.118468	-0.111207	-0.168686	0.0832282	-0.132513	-0.1749	-0.227402	0.0804948	0.00930934	-0.0251831	-0.19742
Cau	-0.548948	-0.545818	-0.600867	-0.368895	-0.388153	-0.300097	-0.0206599	-0.319019	0.0884268	-0.0468875	0.256268	-0.0542791	0.432521	0.0892331	-0.349843	-0.0222448	0.475591	0.388488	-0.139336	-0.139264	0.419239	0.431247	-0.0051381	1.00654	0.274198	0.174224	-0.504368	-0.849081	0.358413	-0.103672	-0.00424851	-0.589798	-0.371819	-0.281202	-0.00467074	0.299013	-0.249661	-0.390308	-0.909717	-0.18008	0.0982131	0.0141862	-0.220589	-0.300304	0.458078	0.458608	0.343282	0.0517071
Clu	-0.39513	-0.45092	-0.129994	0.110434	-0.186604	-0.242095	-0.239171	-0.28894	-0.201781	-0.239706	-0.302465	-0.314759	-0.335578	-0.286751	0.0627677	0.129062	-0.0448811	-0.0394629	-0.173765	-0.18762	-0.100436	-0.111977	-0.244273	-0.261554	-0.553572	-0.494502	-0.0492337	0.118798	-0.325389	-0.296667	-0.372986	-0.360486	-0.221181	-0.261081	-0.355423	-0.32414	-0.467769	-0.444376	-0.387752	-0.0949388	-0.410078	-0.30889	-0.449781	-0.477272	-0.310063	-0.365404	-0.464014	-0.561709
Ala	0.517676	0.548619	0.545039	0.545039	0.518469	0.643938	0.146141	0.502952	0.0208286	-0.331631	-0.251385	-0.304226	0.462372	0.695259	0.587948	NA	-0.205268	-0.240327	-0.283502	-0.497766	0.0498333	-0.0273199	-0.0442012	0.32996	0.0414217	0.642597	-0.0619992	0.651397	0.481885	0.472995	NA	NA	-0.340112	-0.535878	-0.368791	0.28665	0.843129	NA	NA	NA	-0.342545	-0.32328	-1.46713	-1.46713	0.231672	-0.249613	-0.399953	0.290712
Uar	NA	-0.304611	-0.380486	-0.364598	NA	NA	-0.491096	-0.480971	NA	NA	-0.637017	-0.506838	NA	-0.353355	-0.374853	-0.365814	NA	NA	-0.597256	-0.528784	NA	NA	-0.647412	-0.625245	NA	-0.389288	-0.298946	-0.350014	NA	NA	-0.570929	-0.493432	NA	NA	-0.612375	-0.474918	NA	-0.414531	-0.395046	-0.344341	NA	NA	-0.608001	-0.54625	NA	NA	-0.590152	-0.534262
Mlu	0.32319	0.554144	0.745467	0.796069	0.33728	0.543464	0.566799	0.39878	0.235971	0.336889	0.321635	0.49289	0.2953	0.262712	0.212494	0.269101	0.229172	0.422611	0.313589	0.0663087	-0.0287683	0.0550757	0.109891	0.0679383	0.0599356	0.177762	0.439013	0.407675	0.163911	0.224894	0.242357	0.123608	0.106405	0.136439	0.36277	0.306905	0.301883	0.208554	0.288609	-0.163307	0.00371495	-0.0311604	0.0578581	-0.296385	-0.0034946	0.128111	0.408923	0.400643
Mpu	NA	NA	NA	NA	NA	NA	NA	NA	NA	NA	NA	NA	NA	NA	NA	NA	NA	NA	NA	NA	NA	NA	NA	NA	NA	NA	NA	NA	NA	NA	NA	NA	NA	NA	NA	NA	NA	NA	NA	NA	NA	NA	NA	NA	NA	NA	NA	NA
Mma	NA	NA	NA	NA	NA	NA	NA	NA	NA	NA	NA	NA	NA	NA	NA	NA	NA	NA	NA	NA	NA	NA	NA	NA	NA	NA	NA	NA	NA	NA	NA	NA	NA	NA	NA	NA	NA	NA	NA	NA	NA	NA	NA	NA	NA	NA	NA	NA
Ggu	-0.350401	-0.740043	-0.270901	-0.834368	-0.113968	-0.330734	-0.339562	-0.402291	-0.0946429	-0.102808	-0.340908	-0.363264	-0.381582	-0.654509	-0.564213	-0.796539	-0.256776	-0.406702	-0.410581	-0.0884273	-0.463629	-0.360736	-0.453082	-0.3404	NA	NA	-0.461262	NA	0.476861	0.0458166	-0.399363	-0.399363	-0.48945	0.139572	0.772702	0.0521691	0.458178	NA	NA	0.369341	0.430829	-0.530029	NA	NA	-0.592383	-0.218012	0.0518182	-0.242012
Llu	-0.377564	-0.277178	-0.266631	-0.210934	-0.400175	-0.315769	-0.27258	-0.206899	-0.402886	-0.319161	-0.262373	-0.181915	-0.369411	-0.323173	-0.280356	-0.216481	-0.411883	-0.323664	-0.284149	-0.230578	-0.378171	-0.319077	-0.273526	-0.197122	-0.393779	-0.342334	-0.337387	-0.286702	-0.400245	-0.340036	-0.311223	-0.261025	-0.404024	-0.344815	-0.32023	-0.228584	-0.374368	-0.33646	-0.322728	-0.270591	-0.408055	-0.321686	-0.314615	-0.272627	-0.403512	-0.323552	-0.310086	-0.235335
Fsi	-0.4465	-0.461459	-0.225751	0.111291	-0.303162	-0.201549	-0.261915	-0.1351	-0.349842	-0.335105	-0.340585	-0.379299	-0.47589	-0.427222	-0.149101	0.289581	-0.313756	-0.21619	-0.284197	-0.205643	-0.357691	-0.315309	-0.271021	-0.420638	-0.601906	-0.616995	-0.388051	0.0235519	-0.48103	-0.435788	-0.491157	-0.452953	-0.51654	-0.437963	-0.466983	-0.368277	-0.740293	-0.590686	-0.46154	-0.286741	-0.569146	-0.502135	-0.483677	-0.503303	-0.533488	-0.493648	-0.587545	-0.542495
Lly	NA	NA	NA	NA	NA	NA	NA	NA	NA	NA	NA	NA	NA	NA	NA	NA	NA	NA	NA	NA	NA	NA	NA	NA	NA	NA	NA	NA	NA	NA	NA	NA	NA	NA	NA	NA	NA	NA	NA	NA	NA	NA	NA	NA	NA	NA	NA	NA
Lpa	-0.0730237	-0.343718	-0.0373298	-0.129839	0.0119232	-0.182663	-0.332215	NA	0.0596528	NA	-0.93102	-0.532745	0.110109	-0.465221	-0.882457	-0.408702	-0.398548	-0.495908	-0.713703	NA	-0.0582945	-0.510106	-0.264214	-2.16333	-0.436067	NA	NA	NA	-0.267611	-0.0708092	0.213416	-1.89846	0.266416	0.391959	0.174971	-0.251321	NA	NA	NA	NA	-0.109443	-0.510568	-0.139648	-0.457813	-0.0632891	NA	-0.00196903	-0.297761
Hic	0.145264	0.234635	0.222297	0.50146	0.0511271	0.0181191	0.38294	0.236046	0.0955381	0.201706	0.274148	0.368086	0.313837	0.530254	0.772848	0.615422	0.314536	0.296475	0.522003	0.647084	0.505695	0.394927	0.80655	0.868662	0.332914	0.401734	0.462665	-0.265519	0.396947	0.478374	-0.00663971	-0.150993	0.542831	0.250045	0.0972896	-0.0997648	0.42262	0.295418	0.601111	-0.123346	0.426234	0.406613	0.222588	0.345984	0.364342	0.21933	0.09602	0.0527429
Gge	0.391543	-0.114211	0.00298628	-0.0887535	0.398548	0.0339383	-0.217502	-0.196075	0.0943601	0.000715225	-0.0592534	-0.375168	0.0786607	-0.346614	0.139314	0.151926	0.331883	-0.225484	-0.113835	-0.275762	-0.121932	-0.275791	-0.352844	-0.588035	0.156806	0.137795	0.0796628	0.00481139	0.353057	-0.0329325	-0.244048	-0.116484	0.03013	-0.251814	-0.261507	-0.11609	-0.371865	-0.546823	0.111947	-0.260193	0.256818	-0.0745038	-0.361463	-0.380843	0.133922	0.289766	-0.21295	-0.339948
Rru	0.325384	0.200386	0.507895	0.14338	0.0143701	-0.0383329	-0.235964	0.239848	0.160191	-0.0836162	-0.149418	0.415615	0.238562	0.0506312	0.359479	0.220075	-0.0181014	-0.076936	0.060272	0.317329	0.177062	-0.018609	-0.14673	0.408753	0.0164249	-0.149656	0.0413253	0.277543	-0.174335	-0.178851	-0.010352	0.0354311	0.0756938	-0.0749294	-0.218238	-0.0546677	-0.0151291	-0.0435382	0.0983304	-0.427021	-0.285576	-0.102641	-0.0478113	0.0839421	-0.0978501	-0.285865	-0.302018	-0.0554843
Cib	0.0550362	0.478753	0.16031	0.0771991	0.0563382	0.321309	0.391621	0.24993	0.100521	0.660533	0.533964	-0.0566005	-0.216856	0.154205	0.165423	0.198801	-0.0171368	0.260548	0.215879	-0.0817596	-0.0250829	0.0914048	0.230397	-0.0677567	0.369305	0.376384	0.673918	0.416521	0.726001	0.653121	0.636719	0.749699	-0.103158	0.219567	0.073114	-0.0507638	-0.162125	0.181349	0.440793	0.622143	0.0806719	0.0722477	0.166365	0.492953	0.385256	0.208185	0.301882	-0.111934
Cpy	0.553221	NA	-0.0199487	-0.591674	0.601804	0.296568	NA	-0.335719	0.226151	0.252595	-0.446688	0.118935	0.340295	-0.0300376	-0.160038	NA	0.170099	0.124036	0.0244017	0.507363	0.010034	-0.122711	0.241979	0.230061	0.496786	0.477897	NA	0.000753152	0.760104	0.899391	0.735239	-0.0385292	0.263256	0.516303	0.64856	0.824988	0.93465	0.808706	0.383838	0.997253	0.140949	0.257642	0.417536	0.615651	0.0329257	0.405372	0.256471	0.530627
Oam	0.0603386	-0.250925	0.0758617	-0.267437	-0.175037	-0.0760211	0.218909	0.460862	0.0362895	0.192134	0.389253	0.317848	0.0477819	-0.130316	-0.274241	0.331363	-0.404143	-0.037208	-0.124219	-0.0612713	-0.462088	-0.212258	-0.224806	0.161132	0.278658	0.262106	0.25515	0.428585	-0.256768	-0.0310222	-0.164454	-0.0973161	-0.398413	-0.121936	-0.0641174	0.348865	-0.274281	-0.246487	-0.325533	-0.264009	-0.407982	-0.270816	-0.591383	-0.102937	-0.55982	-0.902014	-0.450312	-0.498716
P VALUES
###	V1	V2	V3	V4	V5	V6	V7	V8	V9	V10	V11	V12	V17	V18	V19	V20	V21	V22	V23	V24	V25	V26	V27	V28	V33	V34	V35	V36	V37	V38	V39	V40	V41	V42	V43	V44	V49	V50	V51	V52	V53	V54	V55	V56	V57	V58	V59	V60
Aal	0.146664	0.146664	0.146664	0.0834958	0.121809	0.121809	0.132385	0.0667382	0.0265293	0.0273011	0.0610314	0.0186047	0.0877758	0.0529748	0.0529748	0.0529748	0.122599	0.0776337	0.0931147	0.0514575	0.00638623	0.00362422	0.00330596	0.00892103	0.250162	0.376342	0.328805	0.388342	0.0981286	0.331594	0.314493	0.335498	0.00415107	0.0306278	0.198658	0.221876	0.128583	0.124602	0.554291	0.571698	0.0236658	0.0679496	0.0544787	0.314651	0.00538773	0.00590657	0.00467385	0.00229049
Gpy	0.00805098	0.00538329	0.0115228	0.00741749	0.0621903	0.034282	0.1153	0.106438	0.0809228	0.130073	0.0961735	0.0518371	0.00204635	0.004079	0.000283636	0.00112881	0.007774	0.0131917	0.00314408	0.00316081	0.0105038	0.0375302	0.0124887	0.00440624	0.000517781	0.00035796	0.000686723	0.00422746	0.000568123	0.000480012	0.000235134	0.0144162	0.00153572	0.00211716	0.0011851	9.12179e-05	1.5723e-05	5.02259e-05	1.10448e-05	1.38479e-05	0.00022537	7.52855e-05	8.30705e-05	0.00122273	0.000307447	0.000217789	1.23142e-05	4.89622e-07
Lti	NA	NA	NA	NA	NA	NA	NA	NA	NA	NA	NA	NA	NA	NA	NA	NA	NA	NA	NA	NA	NA	NA	NA	NA	NA	NA	NA	NA	NA	NA	NA	NA	NA	NA	NA	NA	NA	NA	NA	NA	NA	NA	NA	NA	NA	NA	NA	NA
Sci	NA	NA	NA	NA	NA	NA	NA	NA	NA	NA	NA	NA	NA	NA	NA	NA	NA	NA	NA	NA	NA	NA	NA	NA	NA	NA	NA	NA	NA	NA	NA	NA	NA	NA	NA	NA	NA	NA	NA	NA	NA	NA	NA	NA	NA	NA	NA	NA
Pvo	0.475247	0.517724	0.485874	0.488207	0.247829	0.269596	0.222393	0.156126	NA	NA	NA	NA	0.579819	0.6478	0.598284	0.586336	0.487418	0.428463	0.528109	0.526846	NA	NA	NA	NA	0.115602	0.0689486	0.0721655	0.0674507	0.600626	0.662999	0.728198	0.731546	NA	NA	NA	NA	0.0997982	0.0997982	0.0507659	0.0423861	0.158241	0.215977	0.215663	0.234315	NA	NA	NA	NA
Cfi	NA	0.046766	0.700795	0.685699	NA	0.923512	0.0792754	0.0248227	NA	NA	0.103332	0.00509258	NA	0.0274085	0.845243	0.898827	NA	0.923512	0.00614074	0.00978385	NA	NA	0.00341531	0.00161735	NA	0.0274085	0.913717	0.979012	NA	0.923512	7.95835e-05	0.000100965	NA	NA	0.00341531	0.000463067	NA	0.0967399	0.779169	0.79227	NA	0.769556	0.0450308	0.077226	NA	NA	0.000857196	0.000219239
Ccr	NA	NA	NA	NA	NA	NA	NA	NA	NA	NA	NA	NA	NA	NA	NA	NA	NA	NA	NA	NA	NA	NA	NA	NA	NA	NA	NA	NA	NA	NA	NA	NA	NA	NA	NA	NA	NA	NA	NA	NA	NA	NA	NA	NA	NA	NA	NA	NA
Mca	2.04563e-06	4.54157e-07	1.24992e-06	1.58228e-07	1.6003e-06	2.2256e-06	5.55994e-05	0.000104732	1.50785e-05	4.28367e-05	5.33248e-07	1.39619e-05	5.92757e-06	7.89126e-06	1.83592e-05	0.0014446	3.30871e-05	0.000183154	0.00230937	0.0026758	4.01627e-05	0.000192895	2.38686e-05	3.36865e-05	6.69073e-07	3.31226e-06	0.000106479	0.00116933	2.89235e-05	9.85231e-06	2.42785e-05	9.00042e-05	7.16865e-06	6.4508e-05	3.06057e-05	0.000460462	2.24795e-06	4.80143e-07	6.59172e-06	0.000282692	3.01671e-08	2.31112e-07	5.15443e-07	1.64854e-05	3.89266e-06	1.48972e-05	5.89291e-07	0.000146225
Mav	NA	NA	NA	NA	NA	NA	NA	NA	NA	NA	NA	NA	NA	NA	NA	NA	NA	NA	NA	NA	NA	NA	NA	NA	NA	NA	NA	NA	NA	NA	NA	NA	NA	NA	NA	NA	NA	NA	NA	NA	NA	NA	NA	NA	NA	NA	NA	NA
Dni	0.00273677	0.00101711	0.00426279	0.00480727	0.000217587	0.000343042	0.000270617	0.000428538	1.41392e-05	2.655e-05	6.18185e-05	0.00530417	0.000609009	1.57164e-05	8.74937e-05	0.000111654	4.0001e-05	6.99044e-06	1.35382e-05	3.36741e-06	1.38257e-06	1.80369e-07	1.42933e-06	1.60953e-05	0.00088385	3.08122e-06	1.65073e-05	4.02501e-05	1.95258e-05	4.49846e-05	4.85357e-05	3.4522e-05	1.47249e-06	1.62865e-07	5.7365e-05	0.000378711	0.00100045	7.49177e-05	0.000226179	0.00025464	0.000270388	0.000109358	0.000127872	8.74231e-05	1.43189e-05	2.16541e-06	0.000124878	0.00245494
Sbe	NA	NA	NA	NA	NA	NA	NA	NA	NA	NA	NA	NA	NA	NA	NA	NA	NA	NA	NA	NA	NA	NA	NA	NA	NA	NA	NA	NA	NA	NA	NA	NA	NA	NA	NA	NA	NA	NA	NA	NA	NA	NA	NA	NA	NA	NA	NA	NA
Hcr	0.000189732	0.00772726	0.0576926	0.223757	0.0014221	0.0277883	0.137942	0.24134	0.00196285	0.084134	0.0345701	0.147124	0.0114434	0.301138	0.479498	0.696195	0.0193346	0.190854	0.580955	0.771771	0.0320773	0.28246	0.505493	0.960657	0.170378	0.583881	0.958467	0.0775899	0.182907	0.678072	0.45461	0.0482389	0.141873	0.429074	0.837748	0.148685	0.596692	0.336973	0.397485	0.208517	0.407383	0.259358	0.147017	0.0798373	0.316526	0.761258	0.980605	0.14122
Cau	0.190376	0.129042	0.100556	0.685714	0.218438	0.39157	0.874237	0.226812	0.887643	0.893706	0.531966	0.970073	0.279609	0.910973	0.193187	0.937063	0.148748	0.197774	0.869288	0.492899	0.50523	0.305124	0.604017	0.08	0.106122	0.431611	0.0868575	0.0821429	0.145636	0.792333	0.651124	0.190997	0.261746	0.507266	0.555653	0.367879	0.618315	0.18239	0.000301452	0.576386	0.632413	0.821597	0.353919	0.14258	0.0812555	0.0579552	0.104326	0.662969
Clu	0.00561684	0.00504133	0.309472	0.724883	0.0662231	0.0430497	0.0417879	0.0444775	0.0416343	0.0282137	0.0110321	0.0168109	0.0244168	0.116634	0.844879	0.36057	0.718007	0.840309	0.29297	0.390742	0.239734	0.279226	0.0334262	0.0419596	0.00017465	0.00230899	0.602743	0.232551	0.00332347	0.0241162	0.0131932	0.029931	0.0106974	0.00615758	0.00239305	0.0139584	0.000838828	0.00608655	0.0704603	0.571915	0.000680864	0.0376717	0.00110597	0.000551308	0.00125192	0.000441774	0.0002875	0.000182085
Ala	0.288003	0.313162	0.521739	0.521739	0.18826	0.199336	0.832083	0.406692	0.515469	0.103046	0.194056	0.111925	0.593846	0.140807	0.491228	0.111111	0.179264	0.212965	0.287691	0.024639	0.396237	0.0892056	0.176355	1	0.569291	0.769231	0.581818	0.533333	0.733304	0.858824	0.533333	NA	0.650649	0.140351	0.0846233	0.361765	0.078022	0.6	0.222222	0.222222	0.529412	0.245378	0.171429	0.171429	0.851873	0.516959	0.0846233	0.720588
Uar	NA	0.316703	0.0099864	0.00947569	NA	NA	0.020632	0.000282567	NA	NA	0.0335839	0.00767069	NA	0.211157	0.0139894	0.00859978	NA	NA	0.00398044	0.000916437	NA	NA	0.0447552	0.00392938	NA	0.122071	0.0796691	0.0171163	NA	NA	0.0177929	0.00267457	NA	NA	0.0508841	0.0277451	NA	0.136547	0.0284681	0.0249235	NA	NA	0.0133374	0.000872014	NA	NA	0.0916301	0.00554399
Mlu	0.0462661	0.0011202	1.12081e-05	1.70944e-05	0.0445484	0.0030499	0.00377146	0.0569848	0.197632	0.0289831	0.0374711	0.00737702	0.0341673	0.018741	0.0247192	0.0933623	0.0699976	0.00346965	0.0163045	0.378162	0.948718	0.507859	0.253404	0.418923	0.508324	0.267458	0.00974067	0.0219978	0.29818	0.148891	0.201041	0.864951	0.361438	0.240834	0.00954245	0.0312636	0.0426211	0.0929484	0.0233678	0.867525	0.394958	0.486385	0.192714	0.636074	0.876219	0.283173	0.00475071	0.0126132
Mpu	NA	NA	NA	NA	NA	NA	NA	NA	NA	NA	NA	NA	NA	NA	NA	NA	NA	NA	NA	NA	NA	NA	NA	NA	NA	NA	NA	NA	NA	NA	NA	NA	NA	NA	NA	NA	NA	NA	NA	NA	NA	NA	NA	NA	NA	NA	NA	NA
Mma	NA	NA	NA	NA	NA	NA	NA	NA	NA	NA	NA	NA	NA	NA	NA	NA	NA	NA	NA	NA	NA	NA	NA	NA	NA	NA	NA	NA	NA	NA	NA	NA	NA	NA	NA	NA	NA	NA	NA	NA	NA	NA	NA	NA	NA	NA	NA	NA
Ggu	0.205148	0.034215	0.335942	0.0531278	0.364829	0.115411	0.249338	0.135558	0.407676	0.513701	0.151408	0.143353	0.206721	0.0553508	0.111898	0.0278619	0.356806	0.16648	0.288811	0.775505	0.100711	0.20622	0.193822	0.286809	0.87472	0.93417	0.308344	1	0.39935	0.969099	0.389073	0.389073	0.314219	0.639143	0.188975	0.948117	0.739699	0.664158	NA	0.451307	0.655439	0.244099	0.385197	0.385197	0.142551	0.499922	0.888666	0.569506
Llu	0.000453483	0.0122217	0.0132602	0.0643519	0.000304268	0.00394537	0.0082731	0.0639348	0.000232828	0.00290844	0.0154479	0.0963608	0.000669083	0.00252966	0.0114612	0.0735552	0.000242462	0.00274332	0.00655579	0.0414521	0.000724134	0.00298264	0.0123906	0.0724811	0.000173251	0.000887497	0.00087284	0.00671276	0.000237312	0.00109373	0.00185792	0.0146058	0.000179557	0.000884926	0.00146627	0.0268724	0.000545562	0.00131982	0.00187068	0.0139537	0.0001639	0.0029369	0.00165914	0.00972313	0.000211429	0.0023716	0.00270065	0.02519
Fsi	8.29369e-06	5.84362e-05	0.101186	0.499043	0.00139835	0.0544555	0.0206596	0.498849	0.000372758	0.000899753	0.00304089	0.00507062	2.02988e-06	9.78902e-05	0.409575	0.0975934	0.000416095	0.0232701	0.0185319	0.195039	0.000236088	0.00182518	0.0261194	0.00152591	6.52176e-09	6.77458e-08	0.00197501	0.955094	2.1462e-07	1.00224e-05	1.79606e-05	0.000764201	5.504e-07	7.25693e-05	0.000150183	0.0041099	6.6422e-11	7.44686e-07	0.00127606	0.124614	9.21223e-09	9.26581e-07	8.64471e-06	0.000190345	7.26937e-07	1.67433e-05	1.14665e-05	9.86967e-05
Lly	NA	NA	NA	NA	NA	NA	NA	NA	NA	NA	NA	NA	NA	NA	NA	NA	NA	NA	NA	NA	NA	NA	NA	NA	NA	NA	NA	NA	NA	NA	NA	NA	NA	NA	NA	NA	NA	NA	NA	NA	NA	NA	NA	NA	NA	NA	NA	NA
Lpa	0.804727	0.349277	0.813355	0.856068	1	0.532034	0.393162	0.25	0.868923	0.0606061	0.107527	0.222222	0.929236	0.286166	0.0192907	0.25	0.15974	0.384727	0.296429	0.833333	0.622889	0.387352	0.466667	0.0105263	0.432353	0.166667	0.2	0.2	0.461821	0.633053	0.682828	0.0952381	0.688251	0.571429	0.711111	1	0.470588	NA	NA	0.133333	0.799316	0.312308	0.952381	0.616718	0.837001	1	0.970073	0.523377
Hic	0.469873	0.252009	0.653051	0.0551752	0.684756	0.872767	0.0345601	0.255302	0.401071	0.286198	0.117913	0.146166	0.242626	0.0879537	0.00593883	0.0809141	0.311598	0.371632	0.0283129	0.0136582	0.0763723	0.181997	0.00234922	0.000322577	0.168277	0.0922324	0.0488242	0.36027	0.0777819	0.0330193	0.887597	0.473438	0.00585383	0.277365	0.750157	0.701325	0.12369	0.405265	0.0407244	0.59283	0.189581	0.136792	0.462207	0.262231	0.130479	0.421103	0.951953	0.984597
Gge	0.148906	0.680038	0.931967	0.882943	0.0855097	0.917322	0.441795	0.485174	0.449193	0.936254	0.913351	0.172395	0.623227	0.201901	0.566854	0.420795	0.147192	0.416598	0.743958	0.281511	0.73441	0.25182	0.156879	0.0437335	0.312938	0.426562	0.658484	0.825882	0.117072	0.941249	0.484728	0.801045	0.706584	0.317921	0.391586	0.915834	0.210756	0.060256	0.506288	0.258055	0.153911	0.824813	0.205738	0.124462	0.247463	0.114096	0.544965	0.319786
Rru	0.0347682	0.449677	0.106198	0.952215	0.819322	0.84793	0.159036	0.530647	0.135476	0.828149	0.415657	0.112129	0.230148	1	0.331567	0.695993	0.856141	0.665665	0.9684	0.282669	0.114327	0.777007	0.542795	0.165188	0.876516	0.362357	0.968405	0.477584	0.556359	0.38688	0.653931	0.845499	0.457001	0.815245	0.240424	0.775571	1	0.682062	0.984877	0.206094	0.104981	0.478075	0.588697	0.893091	0.640307	0.183188	0.207342	0.897925
Cib	0.667285	0.0231933	0.213119	0.373791	0.683632	0.100552	0.0709775	0.360278	0.625254	0.00508328	0.00828659	0.856438	0.478779	0.430785	0.614697	0.479295	0.97143	0.225526	0.590584	0.8993	0.938854	0.660755	0.184128	0.916394	0.286849	0.164538	0.0104582	0.251275	0.00243389	0.00907667	0.0118161	0.0292852	0.700035	0.206875	0.453846	0.588055	0.942884	0.481656	0.0751884	0.110883	0.564351	0.81934	0.659281	0.12978	0.0721025	0.268321	0.0912577	0.677246
Cpy	0.505929	NA	1	0.326797	0.443077	0.742095	0.380952	0.461821	0.774765	0.678138	0.342857	1	0.441443	1	0.96	1	0.801609	0.85553	1	0.182308	0.833571	0.658441	0.581201	0.635018	0.244846	0.273292	0.9	0.952941	0.0285555	0.0161864	0.0937729	0.906832	0.536376	0.112273	0.1727	0.106227	0.00711947	0.0333457	0.319257	0.0233304	0.669028	0.42746	0.278519	0.108457	0.989869	0.109095	0.45293	0.10039
Oam	0.604579	0.146641	0.408817	0.695593	0.202609	0.79975	0.108707	0.0606654	0.963441	0.252356	0.0906524	0.46232	0.9357	0.343394	0.20284	0.241975	0.00619502	0.766224	0.523906	0.799385	0.00961771	0.426369	0.172673	0.824285	0.2135	0.189046	0.246064	0.18135	0.0446057	0.797004	0.433284	0.764789	0.0384331	0.992725	0.671793	0.31706	0.288088	0.383405	0.169054	0.523683	0.0303888	0.178203	0.0653065	0.88827	0.0051526	0.0244284	0.139209	0.191833

## Sheet: 1.URBAN
	Baseline												2020												2050												2080
	RCP 8.5				RCP 6.0				RCP 4.5				RCP 8.5				RCP 6.0				RCP 4.5				RCP 8.5				RCP 6.0				RCP 4.5				RCP 8.5				RCP 6.0				RCP 4.5
###	D1	D2	D3	D4	D1	D2	D3	D4	D1	D2	D3	D4	D1	D2	D3	D4	D1	D2	D3	D4	D1	D2	D3	D4	D1	D2	D3	D4	D1	D2	D3	D4	D1	D2	D3	D4	D1	D2	D3	D4	D1	D2	D3	D4	D1	D2	D3	D4
Aal	-0.350781	-0.350781	-0.350781	-0.339792	-0.366524	-0.366524	-0.356163	-0.353008	-0.387365	-0.361305	-0.350448	-0.309783	-0.389193	-0.382622	-0.382622	-0.382622	-0.396557	-0.389958	-0.380703	-0.377368	-0.411377	-0.38817	-0.376475	-0.352436	-0.370896	-0.358202	-0.348625	-0.327116	-0.382248	-0.370569	-0.372449	-0.355732	-0.407722	-0.392392	-0.373396	-0.359098	-0.38308	-0.384139	-0.402763	-0.396522	-0.408346	-0.429784	-0.424233	-0.395589	-0.40991	-0.40756	-0.410834	-0.392589
Gpy	-0.246701	-0.247602	-0.221087	-0.191987	-0.261796	-0.177582	-0.247702	-0.234709	-0.251981	-0.137146	-0.0406324	-0.216781	-0.248868	-0.263559	-0.205934	-0.170179	-0.287867	-0.249992	-0.214723	-0.219653	-0.257723	-0.242095	-0.22083	-0.187465	-0.284488	-0.249017	-0.258665	-0.145123	-0.317203	-0.295855	-0.265778	-0.307779	-0.297572	-0.275701	-0.323803	-0.32153	-0.288527	-0.31748	-0.274943	-0.344837	-0.30372	-0.295358	-0.248282	-0.322565	-0.295327	-0.263544	-0.283883	-0.288983
Lti	NA	NA	NA	NA	NA	NA	NA	NA	NA	NA	NA	NA	NA	NA	NA	NA	NA	NA	NA	NA	NA	NA	NA	NA	NA	NA	NA	NA	NA	NA	NA	NA	NA	NA	NA	NA	NA	NA	NA	NA	NA	NA	NA	NA	NA	NA	NA	NA
Sci	NA	NA	NA	NA	NA	NA	NA	NA	NA	NA	NA	NA	NA	NA	NA	NA	NA	NA	NA	NA	NA	NA	NA	NA	NA	NA	NA	NA	NA	NA	NA	NA	NA	NA	NA	NA	NA	NA	NA	NA	NA	NA	NA	NA	NA	NA	NA	NA
Pvo	0.168121	0.166111	0.166531	0.161343	0.169546	0.165564	0.157556	0.161335	NA	NA	NA	NA	0.154359	0.150341	0.153121	0.150341	0.131345	0.128247	0.130914	0.130914	NA	NA	NA	NA	0.148656	0.145429	0.148228	0.145429	0.107919	0.110696	0.107412	0.107412	NA	NA	NA	NA	0.153196	0.153196	0.153196	0.146653	0.137535	0.140866	0.140466	0.137127	NA	NA	NA	NA
Cfi	NA	NA	-0.184017	0.0542426	NA	NA	0.202218	0.12516	NA	NA	-0.277511	-0.222005	NA	NA	-0.19615	0.0437141	NA	NA	0.143565	0.0721118	NA	NA	-0.00564303	0.0254945	NA	NA	-0.211097	0.0383361	NA	NA	-0.066677	-0.0765306	NA	NA	-0.00564303	0.0193028	NA	NA	NA	-0.211327	NA	NA	0.0636297	0.012539	NA	NA	0.0687102	0.0411513
Ccr	NA	NA	NA	NA	NA	NA	NA	NA	NA	NA	NA	NA	NA	NA	NA	NA	NA	NA	NA	NA	NA	NA	NA	NA	NA	NA	NA	NA	NA	NA	NA	NA	NA	NA	NA	NA	NA	NA	NA	NA	NA	NA	NA	NA	NA	NA	NA	NA
Mca	-0.0799137	-0.0417198	-0.0262632	0.218697	-0.0886717	-0.0355268	-0.123499	-0.00573788	-0.027671	-0.0190809	0.0851432	0.0101051	-0.143574	-0.132888	-0.156501	-0.00212358	-0.168732	-0.117389	-0.127014	-0.0364585	-0.166738	-0.130132	-0.0570184	0.0109344	-0.222477	-0.200518	-0.217215	-0.0904695	-0.225199	-0.171552	-0.159961	-0.0682735	-0.207127	-0.203201	-0.151168	-0.0571339	-0.183958	-0.122923	-0.177824	-0.0319775	-0.119549	-0.0885342	-0.099442	-0.0275369	-0.13241	-0.127524	-0.049974	0.0654041
Mav	NA	NA	NA	NA	NA	NA	NA	NA	NA	NA	NA	NA	NA	NA	NA	NA	NA	NA	NA	NA	NA	NA	NA	NA	NA	NA	NA	NA	NA	NA	NA	NA	NA	NA	NA	NA	NA	NA	NA	NA	NA	NA	NA	NA	NA	NA	NA	NA
Dni	-0.0216992	0.174259	0.157955	0.0946223	-0.0709861	-0.0472012	0.132063	0.125281	-0.0540392	0.0664081	0.0281004	-0.0177336	-0.0820917	0.0592843	0.0542256	-0.0253431	-0.125024	-0.124464	-0.0213633	-0.064621	-0.112952	-0.0357857	-0.0615707	-0.106412	-0.135723	-0.130264	-0.0318826	-0.11926	-0.178732	-0.179119	-0.183607	-0.237849	-0.160116	-0.137016	-0.100543	-0.134227	-0.137718	-0.0970779	-0.146461	-0.241786	-0.156073	-0.14781	-0.118775	-0.178841	-0.121169	-0.103755	-0.0750016	-0.133659
Sbe	NA	NA	NA	NA	NA	NA	NA	NA	NA	NA	NA	NA	NA	NA	NA	NA	NA	NA	NA	NA	NA	NA	NA	NA	NA	NA	NA	NA	NA	NA	NA	NA	NA	NA	NA	NA	NA	NA	NA	NA	NA	NA	NA	NA	NA	NA	NA	NA
Hcr	0.218198	0.21047	0.228171	0.120348	0.233646	0.215559	0.149458	0.11926	0.206934	0.12631	0.186985	0.156308	0.177689	0.159851	0.142419	0.0588323	0.20198	0.155919	0.0852817	0.0539363	0.191071	0.122002	0.109033	0.0512695	0.140692	0.130697	0.124965	-0.000194282	0.154917	0.112209	0.0306567	-0.0236543	0.156806	0.108307	0.0964177	0.0283565	0.0684646	0.0454226	0.0930056	0.0172977	0.0881137	0.0669693	0.0429453	0.0151408	0.10344	0.0680453	0.0897031	0.0384852
Cau	NA	NA	NA	NA	NA	NA	NA	NA	NA	NA	NA	NA	NA	NA	NA	NA	NA	NA	NA	NA	NA	NA	NA	NA	NA	NA	NA	NA	NA	NA	NA	NA	NA	NA	NA	NA	NA	NA	NA	NA	NA	NA	NA	NA	NA	NA	NA	NA
Clu	-0.021728	-0.174564	0.0338928	0.0086171	0.0254075	-0.0780744	-0.061694	-0.0859997	0.00088603	-0.0494208	0.0264798	-0.0196477	-0.0457403	-0.170233	0.00546044	0.0721537	0.0876154	0.041215	-0.265916	-0.294603	0.0176917	-0.033021	0.0471426	-0.00853835	-0.0878862	-0.240696	-0.0368106	0.0641009	0.0205418	-0.0571066	-0.291462	-0.326781	-0.0182199	-0.0699409	0.00705078	-0.0267492	-0.282488	-0.251561	-0.177268	0.0336077	-0.215319	-0.271451	-0.289178	-0.318887	-0.217475	-0.269724	-0.274647	-0.307324
Ala	NA	NA	NA	NA	NA	NA	NA	NA	NA	NA	NA	NA	NA	NA	NA	NA	NA	NA	NA	NA	NA	NA	NA	NA	NA	NA	NA	NA	NA	NA	NA	NA	NA	NA	NA	NA	NA	NA	NA	NA	NA	NA	NA	NA	NA	NA	NA	NA
Uar	NA	NA	-0.00704039	0.105443	NA	NA	-0.217596	0.166974	NA	NA	0.362222	0.0840897	NA	NA	0.0042423	0.14026	NA	NA	-0.104019	0.0373199	NA	NA	0.0453783	0.105221	NA	-0.0947924	0.016634	0.171649	NA	NA	-0.0686692	0.089505	NA	NA	-0.00272113	0.105221	NA	-0.0584813	0.0042423	0.0131017	NA	NA	-0.0686692	-0.0715408	NA	NA	0.0453783	0.0840897
Mlu	-0.00433025	0.1495	0.252466	0.112636	0.111988	0.113673	-0.0103917	0.0922584	-0.0826648	-0.0247336	0.139357	0.167568	-0.0686981	-0.323018	-0.323511	-0.458047	-0.443808	-0.11636	-0.123148	-0.224847	-0.275198	-0.254918	-0.307009	-0.30123	-0.229464	-0.141383	-0.318742	-0.267064	0.3418	0.0654411	-0.0722253	-0.0353147	-0.184558	-0.229932	-0.0139813	0.117734	0.0641233	-0.163737	-0.170053	-0.501927	-0.404212	-0.424556	-0.41592	-0.272258	-0.179619	-0.103089	0.0647291	0.167073
Mpu	NA	NA	NA	NA	NA	NA	NA	NA	NA	NA	NA	NA	NA	NA	NA	NA	NA	NA	NA	NA	NA	NA	NA	NA	NA	NA	NA	NA	NA	NA	NA	NA	NA	NA	NA	NA	NA	NA	NA	NA	NA	NA	NA	NA	NA	NA	NA	NA
Mma	NA	NA	NA	NA	NA	NA	NA	NA	NA	NA	NA	NA	NA	NA	NA	NA	NA	NA	NA	NA	NA	NA	NA	NA	NA	NA	NA	NA	NA	NA	NA	NA	NA	NA	NA	NA	NA	NA	NA	NA	NA	NA	NA	NA	NA	NA	NA	NA
Ggu	NA	NA	NA	NA	NA	NA	NA	NA	NA	NA	NA	NA	NA	NA	NA	NA	NA	NA	NA	NA	NA	NA	NA	NA	NA	NA	NA	NA	NA	NA	NA	NA	NA	NA	NA	NA	NA	NA	NA	NA	NA	NA	NA	NA	NA	NA	NA	NA
Llu	-0.21864	-0.178499	-0.169893	-0.219266	-0.242725	-0.195053	-0.251031	-0.20058	-0.243964	-0.192261	-0.234532	-0.168611	-0.220902	-0.19002	-0.17672	-0.236528	-0.23726	-0.199347	-0.27097	-0.223516	-0.238517	-0.192784	-0.259738	-0.199531	-0.222051	-0.195053	-0.181551	-0.250131	-0.239209	-0.198187	-0.271448	-0.225286	-0.240477	-0.194613	-0.266791	-0.20293	-0.215564	-0.189411	-0.179827	-0.245679	-0.241603	-0.19303	-0.273581	-0.23121	-0.241696	-0.188817	-0.262457	-0.193524
Fsi	-0.33285	-0.11782	-0.0712271	0.271874	-0.181137	-0.201625	-0.174314	-0.138079	-0.135655	-0.0927156	-0.00384445	-0.151295	-0.357791	-0.129942	-0.0675514	0.28633	-0.153443	-0.135945	-0.131209	-0.132151	-0.168071	-0.0757538	0.00244851	-0.101931	-0.364421	-0.375171	-0.26157	0.210159	-0.232869	-0.220224	-0.186305	-0.163256	-0.380632	-0.211771	-0.397123	-0.287569	-0.462152	-0.581998	-0.470097	-0.0539962	-0.319843	-0.295294	-0.287113	-0.278047	-0.310051	-0.23869	-0.405111	-0.314396
Lly	NA	NA	NA	NA	NA	NA	NA	NA	NA	NA	NA	NA	NA	NA	NA	NA	NA	NA	NA	NA	NA	NA	NA	NA	NA	NA	NA	NA	NA	NA	NA	NA	NA	NA	NA	NA	NA	NA	NA	NA	NA	NA	NA	NA	NA	NA	NA	NA
Lpa	0.100551	0.0958273	0.22948	0.237238	-0.254744	-0.150633	0.315459	NA	-0.304144	NA	-0.707755	0.106302	0.330075	0.193677	0.122189	0.168751	-0.391959	-0.798972	-0.991462	NA	-0.46434	-0.78653	-0.250434	-0.299902	0.0221675	NA	NA	NA	0.0353924	-0.208837	-0.03287	-0.794532	-0.116082	0.244869	-0.364968	-0.415706	NA	NA	NA	NA	0.38347	-0.783451	-0.293411	-0.330988	-0.316926	NA	0.247581	0.161514
Hic	0.273045	0.311685	0.435908	0.465455	0.229922	0.255735	0.392752	0.414326	0.245028	0.220244	0.327606	0.402619	0.37735	0.436177	0.493495	0.541703	0.385561	0.409481	0.522165	0.569383	0.356865	0.428049	0.513422	0.604808	0.359182	0.442811	0.443657	0.35062	0.468909	0.519446	0.387916	0.16537	0.461357	0.44919	0.389645	0.190145	0.335314	0.413064	0.528158	0.0128954	0.382651	0.40319	0.449316	0.485771	0.405161	0.440929	0.473666	0.312433
Gge	0.302113	0.0534003	0.0330091	0.0851991	0.0839275	0.0713594	-0.0846913	0.0562866	-0.398321	-0.326926	-0.0201315	-0.321953	-0.0393508	0.0434314	0.160525	0.129514	0.025045	0.0500628	-0.0676694	-0.225842	-0.520486	-0.385314	-0.415273	-0.364373	0.0261048	0.0699161	0.134073	0.0801217	0.0334861	-0.140277	-0.389042	-0.203682	-0.39372	-0.462697	-0.452489	-0.238222	-0.382241	-0.406122	-0.211774	0.264225	0.103493	0.0181496	-0.0244507	-0.153832	-0.328279	-0.0740963	-0.296754	-0.366927
Rru	0.0129412	-0.295439	-0.202739	0.574112	-0.343798	-0.121396	0.133773	0.0433486	0.00877687	-0.271458	-0.370218	0.137041	0.0442989	-0.258515	0.0151369	0.545401	-0.341372	-0.176808	0.216444	0.0480909	-0.0383737	-0.235504	-0.365673	0.134671	-0.266819	-0.168889	-0.0655824	0.584556	-0.342172	-0.199007	-0.106258	-0.0655655	0.0704101	-0.353249	-0.353566	-0.0438776	-0.331015	-0.0840761	0.185722	-0.229448	-0.376027	-0.303269	-0.157519	-0.0637478	-0.279622	-0.448136	-0.412192	-0.14619
Cib	-0.010406	0.234834	-0.0343048	-0.0880323	0.187649	-0.00823393	0.129349	-0.0379635	0.0480099	0.0383031	-0.0306077	-0.093468	0.017644	0.551409	0.0864429	0.246809	-0.0456003	-0.0482613	-0.00619796	-0.325407	0.0166752	-0.212144	-0.0508655	-0.142389	0.199515	0.0228952	0.153969	-0.0629583	0.204329	0.16708	0.045509	0.322385	0.0350363	0.00770394	-0.107189	-0.168685	-0.0478778	-0.128122	0.137061	0.119897	-0.261895	-0.0318319	0.0638111	0.388837	0.0270383	-0.266948	-0.153933	0.101131
Cpy	0.17031	NA	0.229125	0.0142163	0.0811804	0.287523	NA	0.521347	0.371862	0.10004	0.407195	0.505905	0.319464	0.49751	0.381802	NA	0.0541364	0.146291	0.229083	0.49709	0.177415	0.0229008	0.121188	0.164956	0.269185	0.444076	NA	0.594024	0.02845	0.350062	0.287455	0.535124	0.0428751	0.0411603	0.162954	0.300503	0.305339	0.568949	-0.0580804	-0.0238225	-0.124847	-0.0921426	-0.0966211	0.0230635	0.0976657	0.13245	0.291638	0.235783
Oam	0.0154211	-0.0567175	0.095136	-0.427894	0.114726	0.237107	0.238356	0.413696	0.212225	-0.0254349	0.294434	0.160693	0.202116	0.122768	0.127804	0.236668	0.119552	0.36661	-0.181451	0.136553	-0.187991	0.0576734	0.117089	0.222313	0.154557	0.266035	0.304167	0.031323	0.0288279	-0.089333	0.0357419	-0.108387	-0.186809	-0.0724463	-0.0305348	-0.0311936	-0.134088	0.0631898	-0.184778	-0.157295	-0.1978	-0.00651764	-0.343327	-0.0598492	-0.483032	-0.555574	-0.309208	-0.559265
P VALUES
###	V1	V2	V3	V4	V5	V6	V7	V8	V9	V10	V11	V12	V17	V18	V19	V20	V21	V22	V23	V24	V25	V26	V27	V28	V33	V34	V35	V36	V37	V38	V39	V40	V41	V42	V43	V44	V49	V50	V51	V52	V53	V54	V55	V56	V57	V58	V59	V60
Aal	0.164234	0.164234	0.164234	0.203075	0.0896716	0.0896716	0.152662	0.134806	0.0179877	0.0525544	0.0939004	0.330554	0.0282554	0.0350431	0.0350431	0.0350431	0.0226333	0.0282376	0.0534039	0.0333597	0.00105883	0.00872887	0.0195648	0.098029	0.0815125	0.125525	0.20243	0.378422	0.046541	0.0732718	0.0681408	0.0888619	0.00135131	0.00322236	0.0188927	0.0380112	0.0430416	0.0447575	0.0634258	0.119877	0.0048867	0.00665234	0.0123778	0.0797524	0.00103886	0.00164275	0.00121289	0.00607298
Gpy	0.231858	0.197569	0.109062	0.105033	0.0423097	0.157128	0.0157637	0.0265154	0.0799192	0.664957	0.841747	0.13201	0.128281	0.0976729	0.0732081	0.0405155	0.0408915	0.0545279	0.070097	0.0457806	0.0287996	0.0351499	0.232484	0.129332	0.0493226	0.10894	0.0435959	0.0936499	0.0179276	0.0163553	0.0223999	0.0411974	0.0454976	0.0721266	0.205793	0.0760435	0.0348273	0.0158877	0.019336	0.00544816	0.0394302	0.0106512	0.0528396	0.025702	0.068792	0.0470434	0.206269	0.0488269
Lti	NA	NA	NA	NA	NA	NA	NA	NA	NA	NA	NA	NA	NA	NA	NA	NA	NA	NA	NA	NA	NA	NA	NA	NA	NA	NA	NA	NA	NA	NA	NA	NA	NA	NA	NA	NA	NA	NA	NA	NA	NA	NA	NA	NA	NA	NA	NA	NA
Sci	NA	NA	NA	NA	NA	NA	NA	NA	NA	NA	NA	NA	NA	NA	NA	NA	NA	NA	NA	NA	NA	NA	NA	NA	NA	NA	NA	NA	NA	NA	NA	NA	NA	NA	NA	NA	NA	NA	NA	NA	NA	NA	NA	NA	NA	NA	NA	NA
Pvo	0.0109986	0.0125197	0.0112763	0.0195727	0.0429953	0.0543017	0.0864241	0.0703793	NA	NA	NA	NA	0.0361186	0.0478398	0.0361664	0.0478398	0.158874	0.184739	0.164732	0.164732	NA	NA	NA	NA	0.0522258	0.122483	0.0970089	0.122483	0.434592	0.391946	0.446751	0.446751	NA	NA	NA	NA	0.0724871	0.0724871	0.0724871	0.231314	0.211516	0.18194	0.18808	0.218404	NA	NA	NA	NA
Cfi	NA	NA	0.559939	0.439998	NA	NA	0.593613	0.3509	NA	NA	0.359147	0.551515	NA	NA	0.412163	0.350192	NA	NA	0.421521	0.186416	NA	NA	0.99187	0.224535	NA	NA	0.252167	0.308074	NA	NA	0.0755914	0.0902416	NA	NA	0.99187	0.165196	NA	NA	NA	0.332353	NA	NA	0.793572	0.593744	NA	NA	0.747848	0.241661
Ccr	NA	NA	NA	NA	NA	NA	NA	NA	NA	NA	NA	NA	NA	NA	NA	NA	NA	NA	NA	NA	NA	NA	NA	NA	NA	NA	NA	NA	NA	NA	NA	NA	NA	NA	NA	NA	NA	NA	NA	NA	NA	NA	NA	NA	NA	NA	NA	NA
Mca	0.742942	0.416427	0.736489	0.45334	0.972572	0.337052	0.7402	0.46559	0.773981	0.779256	0.118952	0.275491	0.718644	0.600286	0.915171	0.847303	0.94889	0.371166	0.845694	0.652397	0.959281	0.794937	0.29636	0.283418	0.620012	0.733226	0.322356	0.695382	0.29702	0.879655	0.730381	0.850978	0.45036	0.398036	0.953502	0.659083	0.602481	0.944007	0.675613	0.931277	0.796712	0.422578	0.704889	0.597246	0.86942	0.979898	0.429365	0.216462
Mav	NA	NA	NA	NA	NA	NA	NA	NA	NA	NA	NA	NA	NA	NA	NA	NA	NA	NA	NA	NA	NA	NA	NA	NA	NA	NA	NA	NA	NA	NA	NA	NA	NA	NA	NA	NA	NA	NA	NA	NA	NA	NA	NA	NA	NA	NA	NA	NA
Dni	0.10671	0.0921587	0.24302	0.50258	0.520936	0.330298	0.283749	0.339074	0.525718	0.586909	0.758403	0.915686	0.499844	0.604742	0.843326	0.869246	0.902219	0.70228	0.709328	0.564142	0.752102	0.724489	0.524408	0.506399	0.88371	0.511633	0.821749	0.544671	0.364469	0.285835	0.153315	0.0854731	0.31509	0.202838	0.339388	0.413449	0.909987	0.794346	0.30674	0.147247	0.597921	0.570866	0.331264	0.162795	0.712803	0.318422	0.438517	0.331764
Sbe	NA	NA	NA	NA	NA	NA	NA	NA	NA	NA	NA	NA	NA	NA	NA	NA	NA	NA	NA	NA	NA	NA	NA	NA	NA	NA	NA	NA	NA	NA	NA	NA	NA	NA	NA	NA	NA	NA	NA	NA	NA	NA	NA	NA	NA	NA	NA	NA
Hcr	0.0193098	0.0553939	0.0334834	0.255185	0.0128188	0.0563785	0.283599	0.4078	0.0827482	0.49105	0.0746023	0.172149	0.120764	0.351706	0.433404	0.958109	0.0595339	0.379114	0.930573	0.676773	0.201515	0.579146	0.574791	0.813055	0.195288	0.337396	0.526826	0.515515	0.221618	0.583528	0.557465	0.255134	0.270817	0.519611	0.653758	0.470302	0.399425	0.922884	0.754477	0.683441	0.43996	0.780728	0.87065	0.47552	0.469839	0.900246	0.620905	0.633713
Cau	NA	NA	NA	NA	NA	NA	NA	NA	NA	NA	NA	NA	NA	NA	NA	NA	NA	NA	NA	NA	NA	NA	NA	NA	NA	NA	NA	NA	NA	NA	NA	NA	NA	NA	NA	NA	NA	NA	NA	NA	NA	NA	NA	NA	NA	NA	NA	NA
Clu	0.915771	0.240788	0.818911	0.667053	0.472782	0.0628585	0.217115	0.152269	0.490144	0.203613	0.664337	0.356749	0.571937	0.234477	0.983003	0.98754	0.842056	0.429915	0.167614	0.0908366	0.57711	0.222253	0.778259	0.506384	0.582425	0.0416652	0.782339	0.988257	0.604151	0.0881452	0.112469	0.0817087	0.567659	0.229716	0.60998	0.407316	0.120339	0.268967	0.116377	0.0466605	0.294164	0.144297	0.111574	0.0602084	0.175696	0.0430526	0.125225	0.088878
Ala	NA	NA	NA	NA	NA	NA	NA	NA	NA	NA	NA	NA	NA	NA	NA	NA	NA	NA	NA	NA	NA	NA	NA	NA	NA	NA	NA	NA	NA	NA	NA	NA	NA	NA	NA	NA	NA	NA	NA	NA	NA	NA	NA	NA	NA	NA	NA	NA
Uar	NA	NA	0.864886	0.782104	NA	NA	0.482342	0.364009	NA	NA	0.0724862	0.709065	NA	NA	0.779725	0.509784	NA	NA	0.77257	0.456548	NA	NA	0.512362	0.608287	NA	0.761223	0.692304	0.323379	NA	NA	0.917501	0.211929	NA	NA	0.687766	0.608287	NA	0.981096	0.779725	0.528634	NA	NA	0.917501	0.652954	NA	NA	0.512362	0.709065
Mlu	0.971584	0.963529	0.34388	0.428064	0.100406	0.414129	0.87597	0.168969	0.698242	0.657531	0.102896	0.259141	0.0772732	0.00103577	0.000282405	0.0009525	0.035648	0.0850378	0.331825	0.204382	0.00678541	0.058234	0.132527	0.0641352	0.0292608	0.0189512	0.0037342	0.0241413	0.336788	0.669414	0.366618	0.406056	0.0262471	0.0410032	0.762886	0.848653	0.447829	0.23032	0.0916395	0.000418498	0.108775	0.0262367	0.0212915	0.246564	0.0629135	0.472043	0.763374	0.919044
Mpu	NA	NA	NA	NA	NA	NA	NA	NA	NA	NA	NA	NA	NA	NA	NA	NA	NA	NA	NA	NA	NA	NA	NA	NA	NA	NA	NA	NA	NA	NA	NA	NA	NA	NA	NA	NA	NA	NA	NA	NA	NA	NA	NA	NA	NA	NA	NA	NA
Mma	NA	NA	NA	NA	NA	NA	NA	NA	NA	NA	NA	NA	NA	NA	NA	NA	NA	NA	NA	NA	NA	NA	NA	NA	NA	NA	NA	NA	NA	NA	NA	NA	NA	NA	NA	NA	NA	NA	NA	NA	NA	NA	NA	NA	NA	NA	NA	NA
Ggu	NA	NA	NA	NA	NA	NA	NA	NA	NA	NA	NA	NA	NA	NA	NA	NA	NA	NA	NA	NA	NA	NA	NA	NA	NA	NA	NA	NA	NA	NA	NA	NA	NA	NA	NA	NA	NA	NA	NA	NA	NA	NA	NA	NA	NA	NA	NA	NA
Llu	8.43361e-05	0.00478976	0.00289583	0.0265421	7.82616e-06	0.00128657	0.00296215	0.0191143	7.16256e-06	0.00047727	0.00527113	0.0896762	4.49385e-05	0.000880183	0.000852635	0.0122186	3.55162e-05	0.000264145	0.0011437	0.012122	3.22885e-05	0.000362812	0.00309502	0.0377414	3.6785e-05	0.000301103	0.000153176	0.00263799	1.28328e-05	0.000292855	0.000861487	0.00581053	1.16479e-05	0.000299585	0.000878958	0.0258915	0.000122309	0.000794093	0.000721185	0.0113265	3.64689e-06	0.00122849	0.00131312	0.00830742	6.08101e-06	0.00064435	0.00198056	0.0781864
Fsi	0.00291235	0.013911	0.933091	0.0860026	0.0250082	0.151049	0.368349	0.203425	0.298631	0.493903	0.916443	0.860886	0.000631037	0.00561495	0.960505	0.0257291	0.0251821	0.369737	0.504991	0.792381	0.248196	0.950458	0.377633	0.483027	1.15002e-05	4.21381e-06	0.0190087	0.480795	0.0103689	0.0896072	0.238638	0.424567	0.0316823	0.627601	0.821158	0.794424	1.10529e-05	5.93263e-05	0.00584658	0.196359	0.000328838	0.00425905	0.0219705	0.0503795	0.0131319	0.0594488	0.154695	0.245306
Lly	NA	NA	NA	NA	NA	NA	NA	NA	NA	NA	NA	NA	NA	NA	NA	NA	NA	NA	NA	NA	NA	NA	NA	NA	NA	NA	NA	NA	NA	NA	NA	NA	NA	NA	NA	NA	NA	NA	NA	NA	NA	NA	NA	NA	NA	NA	NA	NA
Lpa	0.0552498	0.0767314	0.679751	0.628	0.0397034	0.131361	0.841714	1	0.615059	0.143474	0.0331663	0.573494	0.777998	0.769754	0.465213	0.756628	0.1021	0.143095	0.206239	NA	0.734554	0.03742	0.349396	0.321852	0.0821169	0.238185	0.281198	0.281198	0.62002	0.135152	1	0.0786429	0.35428	0.931086	0.676083	0.722483	0.33213	NA	NA	0.179641	0.968827	0.0342334	0.901936	0.728794	0.141525	0.405467	0.902757	0.580557
Hic	0.594655	0.535402	0.170351	0.093882	0.533714	0.556167	0.0813552	0.153532	0.521107	0.727936	0.131811	0.0493774	0.289874	0.60345	0.189172	0.339917	0.265428	0.602537	0.0682721	0.0307519	0.2421	0.726536	0.11712	0.000549613	0.172432	0.0864914	0.0415122	0.353539	0.105032	0.027334	0.266876	0.348505	0.0533936	0.0543173	0.126173	0.217746	0.233735	0.382048	0.0592806	0.978285	0.229904	0.0602976	0.0967824	0.0565797	0.279602	0.0304034	0.0401014	0.374268
Gge	0.9112	0.412955	0.645049	0.731558	0.792013	0.631068	0.616152	0.435874	0.282485	0.439078	0.385294	0.104378	0.236848	0.284441	0.659284	0.906077	0.617476	0.652329	0.955442	0.248239	0.0291245	0.219499	0.655622	0.324244	0.843114	0.315379	0.882377	0.594962	0.792832	0.197765	0.127495	0.217456	0.217986	0.105923	0.26363	0.381099	0.188055	0.0820214	0.494489	0.256278	0.215124	0.872239	0.133976	0.351437	0.81956	0.533441	0.553636	0.253881
Rru	0.346308	0.0412311	0.270575	0.0398789	0.0114035	0.583501	0.448688	0.258571	0.169472	0.16705	0.318886	0.142737	0.353878	0.168247	0.900216	0.10033	0.0223916	0.531271	0.429747	0.376722	0.116306	0.391398	0.245288	0.2409	0.17669	0.169147	0.56659	0.0605307	0.050234	0.488393	0.845761	0.716792	0.440405	0.0572359	0.277482	0.541566	0.13854	0.664804	0.626219	0.679564	0.0106688	0.323881	0.883165	0.750415	0.107283	0.00702754	0.107536	0.896538
Cib	0.86156	0.235274	0.988042	0.815846	0.407536	0.682443	0.412452	0.627612	0.677269	0.652139	0.902432	0.701641	0.936162	0.270615	0.706507	0.981029	0.832965	0.959694	0.989146	0.222499	0.674642	0.196988	0.909427	0.360368	0.555314	1	0.77305	0.80436	0.356836	0.45478	0.573719	0.282471	0.839612	0.953625	0.83945	0.366077	0.970017	0.476145	0.798898	0.861988	0.690519	0.957851	0.857278	0.256062	0.925561	0.233287	0.826779	0.837091
Cpy	0.403242	NA	0.645123	0.169145	0.254626	0.928559	0.932324	0.375584	0.554842	0.439122	0.799815	0.375359	0.880217	0.515434	0.717152	0.652837	0.345371	0.438586	0.675085	0.391051	0.864689	0.755121	0.4806	0.338378	0.684277	0.550693	1	0.65727	0.648078	0.762215	0.900555	0.421385	1	0.511439	0.496424	0.875593	0.539485	0.0318918	0.596317	0.505371	0.273464	0.277847	0.563944	0.902507	0.807969	0.99006	0.987956	0.684664
Oam	0.497845	0.1578	0.988161	0.00565067	0.67512	0.167544	0.151234	0.27359	0.210255	0.332772	0.149499	0.989752	0.396942	0.976193	0.803622	0.203224	0.799683	0.01741	0.0880613	0.646986	0.258121	0.719952	0.202246	0.193935	0.682871	0.208865	0.0771313	0.942236	0.865696	0.229256	0.982864	0.9756	0.313069	0.644026	0.86357	1	0.291286	0.627924	0.339605	0.450162	0.0921393	0.631656	0.392789	0.852171	0.00598056	0.105885	0.459002	0.10295

## Sheet: 2.ARABLE
	Baseline												2020												2050												2080
	RCP 8.5				RCP 6.0				RCP 4.5				RCP 8.5				RCP 6.0				RCP 4.5				RCP 8.5				RCP 6.0				RCP 4.5				RCP 8.5				RCP 6.0				RCP 4.5
###	D1	D2	D3	D4	D1	D2	D3	D4	D1	D2	D3	D4	D1	D2	D3	D4	D1	D2	D3	D4	D1	D2	D3	D4	D1	D2	D3	D4	D1	D2	D3	D4	D1	D2	D3	D4	D1	D2	D3	D4	D1	D2	D3	D4	D1	D2	D3	D4
Aal	-0.262254	-0.262254	-0.262254	-0.275045	-0.230447	-0.230447	-0.251507	-0.275447	-0.257565	-0.288224	-0.295392	-0.346461	-0.427271	-0.442461	-0.442461	-0.442461	-0.393028	-0.407152	-0.429699	-0.443591	-0.310924	-0.336735	-0.477979	-0.400397	-0.438148	-0.451095	-0.439188	-0.457859	-0.327461	-0.417307	-0.412401	-0.420335	-0.205741	-0.219754	-0.168408	-0.165436	-0.426813	-0.429596	-0.362799	-0.299979	-0.311704	-0.285271	-0.270749	-0.288231	-0.166437	-0.210375	-0.213704	-0.180622
Gpy	-0.0739682	-0.000684041	0.00457771	-0.00301635	-0.0268141	0.0999859	0.0689092	0.143407	-0.0030286	0.0511984	0.153706	0.118181	-0.132646	-0.0944223	-0.103497	-0.0942077	-0.0710703	-0.0103477	-0.0110996	-0.022718	-0.0866038	-0.027325	0.0152251	0.032444	-0.250659	-0.240687	-0.245076	-0.2428	-0.193935	-0.131714	-0.178499	-0.0874153	-0.151337	-0.100172	-0.0852083	-0.128365	-0.264161	-0.157272	-0.198192	-0.238237	-0.229975	-0.188861	-0.220005	-0.204379	-0.172899	-0.112372	-0.138129	-0.195263
Lti	NA	NA	NA	NA	NA	NA	NA	NA	NA	NA	NA	NA	NA	NA	NA	NA	NA	NA	NA	NA	NA	NA	NA	NA	NA	NA	NA	NA	NA	NA	NA	NA	NA	NA	NA	NA	NA	NA	NA	NA	NA	NA	NA	NA	NA	NA	NA	NA
Sci	NA	NA	NA	NA	NA	NA	NA	NA	NA	NA	NA	NA	NA	NA	NA	NA	NA	NA	NA	NA	NA	NA	NA	NA	NA	NA	NA	NA	NA	NA	NA	NA	NA	NA	NA	NA	NA	NA	NA	NA	NA	NA	NA	NA	NA	NA	NA	NA
Pvo	-0.0522148	-0.0558315	-0.129307	-0.0339461	-0.200818	-0.201795	-0.209	-0.203874	NA	NA	NA	NA	-0.0402518	0.107561	-0.0178639	-0.0279079	-0.202282	-0.203398	-0.200409	-0.200409	NA	NA	NA	NA	0.103788	0.113885	-0.011139	-0.0208867	-0.233494	-0.229436	-0.235262	-0.235262	NA	NA	NA	NA	0.0730912	0.0730912	0.0730912	0.107017	-0.256716	-0.252702	-0.254296	-0.258319	NA	NA	NA	NA
Cfi	NA	-0.172788	0.00908884	0.214287	NA	NA	-0.175193	-0.248107	NA	NA	0.28792	0.504703	NA	-0.15167	0.0210019	0.107941	NA	NA	-0.133002	-0.105437	NA	NA	0.323637	0.464117	NA	-0.15167	0.074912	0.113218	NA	NA	-0.14886	-0.0743886	NA	NA	0.323637	0.439693	NA	-0.115705	0.131575	0.0868859	NA	NA	0.00777405	0.0576784	NA	NA	0.31203	0.35397
Ccr	NA	NA	NA	NA	NA	NA	NA	NA	NA	NA	NA	NA	NA	NA	NA	NA	NA	NA	NA	NA	NA	NA	NA	NA	NA	NA	NA	NA	NA	NA	NA	NA	NA	NA	NA	NA	NA	NA	NA	NA	NA	NA	NA	NA	NA	NA	NA	NA
Mca	0.927217	0.909377	0.960107	0.95503	0.898453	0.792385	0.792346	0.815799	0.766932	0.745267	0.752113	0.744873	0.833741	0.836861	0.91375	0.835055	0.829746	0.675908	0.725153	0.752758	0.763195	0.67012	0.700321	0.656839	0.963605	0.902693	0.886398	0.859296	0.880913	0.841777	0.855178	0.838829	0.845031	0.740503	0.759699	0.552626	0.972137	0.924334	0.892747	0.836805	0.982009	0.907141	0.930371	0.809747	0.827189	0.821615	0.837521	0.627118
Mav	NA	NA	NA	NA	NA	NA	NA	NA	NA	NA	NA	NA	NA	NA	NA	NA	NA	NA	NA	NA	NA	NA	NA	NA	NA	NA	NA	NA	NA	NA	NA	NA	NA	NA	NA	NA	NA	NA	NA	NA	NA	NA	NA	NA	NA	NA	NA	NA
Dni	0.00433608	-0.0432238	0.113981	0.25972	-0.0991163	-0.0734516	-0.0864943	0.0370287	-0.0681949	-0.0740238	-0.0103872	0.0956374	-0.0870465	-0.123639	0.0556645	0.190572	-0.154891	-0.14445	-0.137209	-0.0659119	-0.128778	-0.137828	-0.0671431	0.0277901	-0.0890205	-0.150629	0.0357145	0.156027	-0.201571	-0.157834	-0.161782	-0.0766673	-0.1589	-0.150863	-0.0500741	0.0556149	-0.112235	-0.150046	-0.0109038	0.102073	-0.167799	-0.162395	-0.176492	-0.0644304	-0.132491	-0.132503	-0.0365534	0.071203
Sbe	NA	NA	NA	NA	NA	NA	NA	NA	NA	NA	NA	NA	NA	NA	NA	NA	NA	NA	NA	NA	NA	NA	NA	NA	NA	NA	NA	NA	NA	NA	NA	NA	NA	NA	NA	NA	NA	NA	NA	NA	NA	NA	NA	NA	NA	NA	NA	NA
Hcr	0.323329	0.268506	0.255256	0.163823	0.257085	0.266703	0.28748	0.0917238	0.255589	0.162695	0.274027	0.265506	0.383661	0.278895	0.265379	0.0926695	0.323204	0.291858	0.2798	0.0496023	0.334414	0.276583	0.273616	0.213023	0.173699	0.178128	0.117194	-0.104256	0.148149	0.138184	0.0811907	-0.202559	0.228151	0.175059	0.161744	-0.0372568	0.157802	0.03543	-0.0769142	-0.21987	0.122711	0.00880444	0.0052743	-0.33438	0.130702	0.0664949	0.0131125	-0.139122
Cau	NA	NA	NA	NA	NA	NA	NA	NA	NA	NA	NA	NA	NA	NA	NA	NA	NA	NA	NA	NA	NA	NA	NA	NA	NA	NA	NA	NA	NA	NA	NA	NA	NA	NA	NA	NA	NA	NA	NA	NA	NA	NA	NA	NA	NA	NA	NA	NA
Clu	0.268021	0.369447	0.307394	-0.240516	-0.27516	-0.391213	-0.547506	-0.545932	-0.223986	-0.264808	-0.246327	-0.197495	0.29565	0.346705	0.273846	-0.109309	-0.19674	-0.273872	-0.482666	-0.471818	-0.21536	-0.258902	-0.240577	-0.17888	0.257338	0.315067	0.237157	-0.126739	-0.302857	-0.384073	-0.596417	-0.560277	-0.263708	-0.305716	-0.281459	-0.158014	-0.0346073	-0.0395115	-0.252072	-0.482117	-0.328752	-0.41447	-0.549255	-0.561743	-0.324642	-0.369259	-0.385033	-0.295477
Ala	NA	NA	NA	NA	NA	NA	NA	NA	NA	NA	NA	NA	NA	NA	NA	NA	NA	NA	NA	NA	NA	NA	NA	NA	NA	NA	NA	NA	NA	NA	NA	NA	NA	NA	NA	NA	NA	NA	NA	NA	NA	NA	NA	NA	NA	NA	NA	NA
Uar	NA	NA	-0.0387601	0.0503633	NA	NA	0.0325973	-0.0838508	NA	NA	NA	0.0313711	NA	NA	0.176131	0.0815539	NA	NA	NA	-0.04776	NA	NA	NA	0.0486377	NA	NA	0.0779908	0.109523	NA	NA	NA	-0.0079924	NA	NA	NA	0.0486377	NA	NA	0.0665859	0.0385127	NA	NA	NA	-0.0079924	NA	NA	NA	0.0313711
Mlu	0.17229	0.241114	0.0806897	0.17995	0.0241006	-0.0911208	0.142119	0.12987	0.300268	0.578439	0.19039	0.237912	-0.0711589	0.0161932	-0.0450134	-0.173583	-0.275592	-0.12357	1.51226e-05	-0.17598	-0.0094935	0.129664	0.00896396	-0.0107522	0.12026	-0.0767571	-0.243904	-0.226236	0.237349	0.101459	0.084528	-0.169372	0.0963575	0.216017	0.131215	0.124097	-0.0599306	-0.113349	-0.15409	-0.134707	-0.213233	-0.197856	-0.0483685	0.180935	0.0717114	0.330409	0.271631	0.0871689
Mpu	NA	NA	NA	NA	NA	NA	NA	NA	NA	NA	NA	NA	NA	NA	NA	NA	NA	NA	NA	NA	NA	NA	NA	NA	NA	NA	NA	NA	NA	NA	NA	NA	NA	NA	NA	NA	NA	NA	NA	NA	NA	NA	NA	NA	NA	NA	NA	NA
Mma	NA	NA	NA	NA	NA	NA	NA	NA	NA	NA	NA	NA	NA	NA	NA	NA	NA	NA	NA	NA	NA	NA	NA	NA	NA	NA	NA	NA	NA	NA	NA	NA	NA	NA	NA	NA	NA	NA	NA	NA	NA	NA	NA	NA	NA	NA	NA	NA
Ggu	NA	NA	NA	NA	NA	NA	NA	NA	NA	NA	NA	NA	NA	NA	NA	NA	NA	NA	NA	NA	NA	NA	NA	NA	NA	NA	NA	NA	NA	NA	NA	NA	NA	NA	NA	NA	NA	NA	NA	NA	NA	NA	NA	NA	NA	NA	NA	NA
Llu	-0.475607	-0.440274	-0.435315	-0.382287	-0.495558	-0.466323	-0.441247	-0.40895	-0.482389	-0.476752	-0.441039	-0.371332	-0.47169	-0.469441	-0.455062	-0.406103	-0.491015	-0.476029	-0.458881	-0.437303	-0.477022	-0.477164	-0.460602	-0.41896	-0.476305	-0.478552	-0.471868	-0.426263	-0.495076	-0.485589	-0.468815	-0.444911	-0.482053	-0.48193	-0.47332	-0.422737	-0.470057	-0.469371	-0.461611	-0.414553	-0.495076	-0.470939	-0.464806	-0.446571	-0.479868	-0.472325	-0.463495	-0.39558
Fsi	-0.627045	-0.500557	-0.080711	0.371473	-0.307676	-0.263174	-0.380607	-0.0366702	-0.251641	-0.24228	-0.114752	-0.124143	-0.681277	-0.52479	-0.0272385	0.626113	-0.414114	-0.210483	-0.20963	-0.103591	-0.261205	-0.152027	-0.0638606	-0.0230686	-0.892046	-0.72687	-0.257065	0.442477	-0.442548	-0.368633	-0.380545	-0.253637	-0.390531	-0.245104	-0.25749	-0.110994	-1.01373	-0.909147	-0.457117	0.132931	-0.527149	-0.472951	-0.436334	-0.445866	-0.436517	-0.439978	-0.519639	-0.441296
Lly	NA	NA	NA	NA	NA	NA	NA	NA	NA	NA	NA	NA	NA	NA	NA	NA	NA	NA	NA	NA	NA	NA	NA	NA	NA	NA	NA	NA	NA	NA	NA	NA	NA	NA	NA	NA	NA	NA	NA	NA	NA	NA	NA	NA	NA	NA	NA	NA
Lpa	-0.424496	-0.982002	0.0579786	0.115793	0.0484927	0.0904258	-0.575601	NA	-0.142935	NA	-3.21557	-0.301216	0.25665	0.00378193	-0.224518	-0.277808	-0.172857	-0.366287	-0.342709	NA	-0.124062	-0.336095	0.232774	-0.702865	0.259419	NA	NA	NA	-0.317346	-0.558266	0.264136	-1.83654	-0.00161978	-0.337685	-0.996048	-0.423733	NA	NA	NA	NA	0.0591622	-0.0884492	0.733793	-0.615634	-0.464947	NA	0.0113699	-0.430246
Hic	0.334761	0.130305	0.0461389	0.161307	0.202733	0.0408755	0.198404	0.0626043	0.209698	-0.00790996	0.121364	0.228664	0.253406	0.0458066	0.0851287	0.1565	0.133652	0.0444444	0.140629	0.0481714	0.164027	-0.113762	0.173078	0.149898	0.152167	0.122529	-0.117754	-0.627662	0.178193	0.0992425	-0.450615	-0.54258	0.237799	-0.288363	-0.451804	-0.313585	0.195461	-0.0392106	-0.202146	-0.524955	0.24536	-0.158007	-0.454628	-0.377892	0.249107	-0.241936	-0.407062	-0.515243
Gge	0.193089	0.967653	1.07874	0.958292	0.0932576	0.422733	0.846706	0.699015	-0.259756	0.0844622	0.702044	0.795024	-0.135226	0.684861	0.72063	0.663242	-0.189414	0.211114	0.616551	0.602431	-0.424676	-0.0707029	0.236653	0.569568	0.0266512	0.229882	0.529665	0.535895	-0.315176	0.0434915	0.284911	0.61029	-0.399073	-0.00137312	0.12366	0.342753	0.193396	0.268529	0.181667	8.39522e-05	0.0675674	0.280155	0.777888	0.398937	-0.111188	0.137931	0.847976	0.612901
Rru	0.297564	0.361052	0.525363	0.893603	0.169942	0.707299	0.801011	0.963016	0.301314	0.39195	0.737143	0.809404	0.243749	0.206086	0.475839	0.847517	0.190283	0.624147	0.653831	0.919563	0.139574	0.374606	0.589931	0.971859	0.304021	0.132096	0.416116	0.657962	0.241151	0.629634	0.731931	0.868292	0.140877	0.332229	0.636818	0.931437	0.301571	0.411451	0.711146	0.296094	0.249474	0.641895	0.587228	0.76087	0.274686	0.358622	0.553831	0.722539
Cib	-0.36555	-0.263905	-0.302864	-0.352405	0.0559055	-0.0798323	0.315765	-0.209147	-0.215082	-0.110423	-0.223606	-0.289481	-0.511762	-0.437676	NA	NA	-0.216506	0.19066	0.240926	-0.178796	-0.371441	-0.268421	0.0994981	NA	0.141692	0.14916	0.254699	0.268104	0.0334988	NA	0.334474	0.341473	0.0344266	0.0932543	0.10073	-0.0578157	NA	NA	NA	NA	-0.108612	-0.0977837	-0.0486525	-0.0181949	0.0324409	0.163683	0.163417	-0.0127856
Cpy	0.686841	NA	-0.0377444	-0.128165	0.152663	0.163051	NA	-0.0814181	-0.352426	-0.286583	0.292338	0.131648	-0.0676811	-0.673517	0.188702	NA	-0.117345	-0.185739	-0.199544	0.246223	-0.462515	-0.0754934	-0.120269	0.380532	-0.074344	-0.29903	NA	-0.0193237	-0.0249126	0.591784	-0.261789	-0.784333	-0.33258	-0.0907095	-0.0558643	0.215685	0.366309	0.106841	0.192713	0.207814	-0.498774	0.070105	0.0375031	-0.273819	0.0476055	0.101544	0.00514062	-0.0946849
Oam	-0.197274	-0.281154	-0.116252	0.0522456	-0.252057	0.0162802	0.0359262	0.0428491	-0.00399652	0.186308	0.153691	0.294541	-0.020317	-0.309758	-0.0849729	-0.216665	-0.177848	-0.0379951	0.459679	-0.0611314	-0.163454	0.08518	-0.0210882	0.132586	-0.195102	-0.258991	0.17353	-0.460367	-0.207002	0.0841908	0.517473	0.102764	-0.199268	0.113341	0.130538	0.306333	-0.0501966	-0.0389706	-0.453539	-0.393827	-0.286399	0.019246	0.375298	0.486734	-0.244474	-0.071407	0.0434839	0.616496
P VALUES
###	V1	V2	V3	V4	V5	V6	V7	V8	V9	V10	V11	V12	V17	V18	V19	V20	V21	V22	V23	V24	V25	V26	V27	V28	V33	V34	V35	V36	V37	V38	V39	V40	V41	V42	V43	V44	V49	V50	V51	V52	V53	V54	V55	V56	V57	V58	V59	V60
Aal	0.325783	0.325783	0.325783	0.263175	0.481683	0.481683	0.365577	0.26131	0.38045	0.259018	0.220601	0.0892704	0.00979852	0.00648647	0.00648647	0.00648647	0.0200722	0.0137687	0.0075504	0.00994368	0.0714077	0.0516481	0.00464468	0.0346241	0.00935713	0.00598194	0.00730927	0.00407639	0.0397284	0.0132116	0.0140482	0.0107334	0.162373	0.0917852	0.187936	0.143945	0.00823917	0.00789177	0.0422835	0.0960745	0.0396858	0.0587728	0.0707188	0.0388087	0.149354	0.0607598	0.0618563	0.0892102
Gpy	0.573121	0.942762	0.999095	0.818471	0.800731	0.332058	0.313381	0.210688	0.59002	0.332424	0.0754288	0.250167	0.242044	0.387913	0.25094	0.268782	0.805667	0.889642	0.992206	0.906623	0.613893	0.810855	0.707422	0.737445	0.0235931	0.023167	0.0262993	0.0296592	0.156728	0.20578	0.161524	0.562876	0.323292	0.615061	0.59964	0.291698	0.0188157	0.109003	0.0498257	0.0237606	0.0812629	0.0929519	0.0759149	0.124139	0.192161	0.409591	0.306299	0.105074
Lti	NA	NA	NA	NA	NA	NA	NA	NA	NA	NA	NA	NA	NA	NA	NA	NA	NA	NA	NA	NA	NA	NA	NA	NA	NA	NA	NA	NA	NA	NA	NA	NA	NA	NA	NA	NA	NA	NA	NA	NA	NA	NA	NA	NA	NA	NA	NA	NA
Sci	NA	NA	NA	NA	NA	NA	NA	NA	NA	NA	NA	NA	NA	NA	NA	NA	NA	NA	NA	NA	NA	NA	NA	NA	NA	NA	NA	NA	NA	NA	NA	NA	NA	NA	NA	NA	NA	NA	NA	NA	NA	NA	NA	NA	NA	NA	NA	NA
Pvo	0.85016	0.877971	0.919104	0.748293	0.805804	0.664105	0.623696	0.54499	NA	NA	NA	NA	0.697741	0.358502	0.507531	0.576441	0.844559	0.984064	0.958406	0.958406	NA	NA	NA	NA	0.375079	0.324391	0.464352	0.528769	0.483287	0.543938	0.465655	0.465655	NA	NA	NA	NA	0.530111	0.530111	0.530111	0.285233	0.457411	0.519849	0.503761	0.442279	NA	NA	NA	NA
Cfi	NA	0.760772	0.119269	0.000888651	NA	0.30677	0.138723	0.285101	NA	NA	0.295142	0.00104647	NA	0.391702	0.0764851	0.0144108	NA	0.30677	0.0770791	0.0869712	NA	NA	0.0956523	0.000816155	NA	0.391702	0.0194847	0.00644103	NA	0.30677	0.174358	0.0685385	NA	NA	0.0956523	0.000778809	NA	0.330139	0.0380972	0.0427435	NA	0.993261	0.0982101	0.0316254	NA	NA	0.117603	0.00607647
Ccr	NA	NA	NA	NA	NA	NA	NA	NA	NA	NA	NA	NA	NA	NA	NA	NA	NA	NA	NA	NA	NA	NA	NA	NA	NA	NA	NA	NA	NA	NA	NA	NA	NA	NA	NA	NA	NA	NA	NA	NA	NA	NA	NA	NA	NA	NA	NA	NA
Mca	4.76677e-09	7.53359e-08	1.51602e-07	5.40026e-07	8.24442e-09	1.57997e-06	5.69625e-06	1.08295e-05	5.04153e-07	1.62743e-06	1.12108e-05	8.20162e-05	2.79063e-08	1.77602e-07	1.21248e-07	5.41768e-06	2.16904e-08	1.06017e-05	6.43094e-06	1.73754e-05	9.0791e-08	2.64476e-06	1.1074e-05	9.99329e-05	1.51842e-10	1.03777e-08	1.71965e-07	3.06022e-06	4.31841e-09	9.01209e-08	2.47603e-07	9.45166e-07	1.05461e-08	2.7221e-07	2.78748e-06	0.000737594	1.3732e-10	3.56079e-09	1.02534e-07	3.57262e-06	7.64021e-11	6.56751e-09	1.68672e-08	4.50218e-06	3.32263e-08	3.03947e-08	2.39586e-07	0.000123199
Mav	NA	NA	NA	NA	NA	NA	NA	NA	NA	NA	NA	NA	NA	NA	NA	NA	NA	NA	NA	NA	NA	NA	NA	NA	NA	NA	NA	NA	NA	NA	NA	NA	NA	NA	NA	NA	NA	NA	NA	NA	NA	NA	NA	NA	NA	NA	NA	NA
Dni	0.048432	0.118515	0.0493475	0.0413789	0.439217	0.345149	0.379986	0.167444	0.435021	0.60739	0.433051	0.229256	0.38815	0.670603	0.190274	0.119634	0.971988	0.934303	0.68851	0.693485	0.977373	0.943285	0.746996	0.479906	0.423295	0.81714	0.164025	0.103984	0.677038	0.934348	0.911718	0.753544	0.877933	0.973309	0.49673	0.338967	0.504931	0.579251	0.352948	0.23124	0.971503	0.863156	0.822781	0.4836	0.782079	0.724819	0.279414	0.154952
Sbe	NA	NA	NA	NA	NA	NA	NA	NA	NA	NA	NA	NA	NA	NA	NA	NA	NA	NA	NA	NA	NA	NA	NA	NA	NA	NA	NA	NA	NA	NA	NA	NA	NA	NA	NA	NA	NA	NA	NA	NA	NA	NA	NA	NA	NA	NA	NA	NA
Hcr	0.00213604	0.0164559	0.0273092	0.184044	0.0103488	0.0149368	0.0128453	0.464748	0.0124461	0.113003	0.0190305	0.0322884	0.000211099	0.00753215	0.0141923	0.382341	0.0010651	0.00532912	0.00944707	0.581524	0.000927537	0.00855982	0.011993	0.0599222	0.0464139	0.0577745	0.168609	0.664001	0.0704089	0.108591	0.301269	0.190697	0.017307	0.073942	0.102623	0.938777	0.0752942	0.529743	0.790301	0.159749	0.143059	0.719431	0.751693	0.0196407	0.127368	0.377685	0.657341	0.487826
Cau	NA	NA	NA	NA	NA	NA	NA	NA	NA	NA	NA	NA	NA	NA	NA	NA	NA	NA	NA	NA	NA	NA	NA	NA	NA	NA	NA	NA	NA	NA	NA	NA	NA	NA	NA	NA	NA	NA	NA	NA	NA	NA	NA	NA	NA	NA	NA	NA
Clu	0.266551	0.171749	0.265932	0.0875116	0.0570636	0.0223713	0.000482949	0.00084135	0.00746902	0.0126525	0.0295508	0.0524354	0.148028	0.205696	0.21071	0.615955	0.230844	0.145049	0.00186333	0.00234252	0.00689024	0.00801692	0.0145301	0.0575166	0.384909	0.442811	0.378732	0.2822	0.0431666	0.0248689	0.000166005	0.000436674	0.00165599	0.00337757	0.015878	0.174179	0.780525	0.577006	0.139119	0.0239118	0.0199903	0.00785102	0.000165387	0.000118132	0.000409791	0.000789409	0.000992567	0.0088165
Ala	NA	NA	NA	NA	NA	NA	NA	NA	NA	NA	NA	NA	NA	NA	NA	NA	NA	NA	NA	NA	NA	NA	NA	NA	NA	NA	NA	NA	NA	NA	NA	NA	NA	NA	NA	NA	NA	NA	NA	NA	NA	NA	NA	NA	NA	NA	NA	NA
Uar	NA	NA	0.819021	0.980314	NA	NA	0.872216	0.538281	NA	NA	NA	0.895824	NA	NA	0.388217	0.839831	NA	NA	NA	0.716749	NA	NA	NA	0.972769	NA	NA	0.959389	0.68886	NA	NA	NA	0.905082	NA	NA	NA	0.972769	NA	NA	0.906447	0.772681	NA	NA	NA	0.905082	NA	NA	NA	0.895824
Mlu	0.681209	0.669764	0.832163	0.705991	0.840141	0.718273	0.917706	0.74477	0.114716	0.0104624	0.400793	0.362827	0.776509	0.939995	0.564872	0.199665	0.139998	0.425598	0.555847	0.367864	0.764355	0.527634	0.872782	0.768015	0.486986	0.317709	0.0318638	0.0759976	0.663573	0.775959	0.693576	0.18502	0.739269	0.280615	0.517285	0.680807	0.516563	0.171776	0.0549756	0.138707	0.119534	0.0844732	0.281397	0.754776	0.637453	0.0419016	0.0846136	0.575025
Mpu	NA	NA	NA	NA	NA	NA	NA	NA	NA	NA	NA	NA	NA	NA	NA	NA	NA	NA	NA	NA	NA	NA	NA	NA	NA	NA	NA	NA	NA	NA	NA	NA	NA	NA	NA	NA	NA	NA	NA	NA	NA	NA	NA	NA	NA	NA	NA	NA
Mma	NA	NA	NA	NA	NA	NA	NA	NA	NA	NA	NA	NA	NA	NA	NA	NA	NA	NA	NA	NA	NA	NA	NA	NA	NA	NA	NA	NA	NA	NA	NA	NA	NA	NA	NA	NA	NA	NA	NA	NA	NA	NA	NA	NA	NA	NA	NA	NA
Ggu	NA	NA	NA	NA	NA	NA	NA	NA	NA	NA	NA	NA	NA	NA	NA	NA	NA	NA	NA	NA	NA	NA	NA	NA	NA	NA	NA	NA	NA	NA	NA	NA	NA	NA	NA	NA	NA	NA	NA	NA	NA	NA	NA	NA	NA	NA	NA	NA
Llu	7.10869e-08	5.19521e-06	1.89939e-05	0.000151662	3.46832e-07	2.8298e-06	8.32298e-06	4.21516e-05	2.90574e-07	5.6034e-07	4.12278e-06	5.68642e-05	1.53796e-07	2.45581e-07	3.9477e-06	4.09046e-05	5.58138e-07	5.81431e-07	1.31266e-06	5.07944e-06	1.10299e-06	8.55596e-07	2.64404e-06	1.07128e-05	4.42135e-08	4.69735e-08	1.95765e-07	9.62839e-07	1.71419e-07	4.80642e-08	1.39484e-07	5.08867e-07	1.41712e-07	2.55885e-07	9.5888e-08	2.13849e-06	1.24415e-07	3.76234e-07	1.16226e-06	6.45119e-06	1.71419e-07	6.36636e-07	4.64398e-07	4.8765e-07	2.69098e-07	9.18371e-07	5.73209e-07	9.47818e-06
Fsi	0.000514695	0.00938281	0.742404	0.0852284	0.0205697	0.112159	0.0871108	0.700844	0.444276	0.51681	0.558424	0.687638	4.95707e-05	0.00315689	0.79564	0.00617157	0.00407916	0.434337	0.44367	0.995242	0.502031	0.825419	0.464228	0.618051	1.72131e-07	5.32155e-05	0.189178	0.102377	0.00455431	0.0607185	0.042926	0.27303	0.0489454	0.555771	0.758115	0.561908	9.19762e-07	5.04644e-05	0.0665207	0.916366	0.00039266	0.00626757	0.0231101	0.0219908	0.0166936	0.0537508	0.0356857	0.141449
Lly	NA	NA	NA	NA	NA	NA	NA	NA	NA	NA	NA	NA	NA	NA	NA	NA	NA	NA	NA	NA	NA	NA	NA	NA	NA	NA	NA	NA	NA	NA	NA	NA	NA	NA	NA	NA	NA	NA	NA	NA	NA	NA	NA	NA	NA	NA	NA	NA
Lpa	0.391935	0.0453838	0.761357	0.799316	0.66542	0.627345	0.393162	0.833333	0.943629	0.666667	0.00430108	0.388615	0.355123	0.906832	0.3587	0.426471	0.643563	0.891641	0.521429	0.5	0.847601	0.711462	0.685714	0.263158	0.361765	0.166667	0.2	0.2	0.516959	0.246032	0.682828	0.0952381	0.599511	0.571429	0.266667	0.857143	0.117647	NA	NA	0.133333	0.913504	0.94	0.609524	0.0800826	0.391097	0.846154	0.970073	0.264935
Hic	0.0805972	0.616799	0.832976	0.708559	0.360291	0.950033	0.732778	0.902055	0.374706	0.706946	0.898796	0.63034	0.407519	0.89714	0.899979	0.961981	0.650492	0.858186	0.980939	0.759736	0.598627	0.393015	0.683358	0.848532	0.816681	0.906709	0.273213	0.0141012	0.730285	0.866752	0.0209734	0.0189803	0.28024	0.0856559	0.0473041	0.299901	0.721519	0.528542	0.212397	0.0142764	0.394474	0.331135	0.00655742	0.0341192	0.333009	0.0751489	0.0121202	0.00125546
Gge	0.239449	0.00670112	0.00474793	0.00420387	0.195814	0.0161722	0.00360992	0.0566628	0.51103	0.16695	0.0159307	0.0125676	0.842772	0.04003	0.0104003	0.0223835	0.789921	0.155359	0.0248159	0.0422085	0.0961662	0.639556	0.161824	0.0702879	0.527296	0.353103	0.0280351	0.0438571	0.520318	0.473427	0.14657	0.0209424	0.102516	0.371934	0.240467	0.115984	0.391258	0.38239	0.450202	0.867079	0.25459	0.111274	0.0306297	0.0358408	0.952548	0.125381	0.00096486	0.0301271
Rru	0.289858	0.359674	0.241359	0.0115109	0.544383	0.00978078	0.00281236	0.00112436	0.175094	0.0510579	0.00562913	0.00106263	0.774876	0.919878	0.45667	0.0291887	0.685228	0.0495596	0.0146528	0.00109047	0.493055	0.0658414	0.0151149	0.000245057	0.568729	0.732145	0.577122	0.0494303	0.471504	0.0224125	0.0218462	0.00484268	0.919737	0.130488	0.0279117	0.0011388	0.483578	0.139147	0.114568	0.424891	0.492708	0.0147666	0.0829024	0.0154594	0.320685	0.139449	0.0566401	0.0228568
Cib	0.276557	0.830543	0.746554	0.382406	0.744909	0.689934	0.201249	0.866126	0.480278	0.704452	0.881219	0.629831	0.0381601	0.226528	NA	NA	0.1506	0.681927	0.493132	0.746036	0.175416	0.700042	0.346193	NA	0.809543	0.901945	0.488777	0.541187	0.987039	NA	0.245175	0.427748	0.976097	0.550554	0.545373	0.679606	NA	NA	NA	NA	0.269846	0.552535	0.736087	0.92127	0.696415	0.356584	0.385258	0.84057
Cpy	0.237154	NA	0.635255	0.640523	0.812308	0.679842	0.47619	0.762907	0.187695	0.466439	0.533333	0.633643	0.616109	0.111737	0.763353	NA	0.436355	0.375032	0.41835	0.872389	0.0219273	0.360711	0.892919	0.250519	0.603654	0.174305	0.384088	0.341729	1	0.110776	0.489708	0.0311803	0.146037	0.216619	0.360867	1	0.306315	0.925291	0.916153	0.968849	0.0259319	0.515062	0.677945	0.073012	0.856097	0.775281	0.730853	1
Oam	0.166756	0.0879387	0.796589	0.937565	0.3296	0.975947	0.75509	0.817797	1	0.341259	0.272722	0.536542	0.315609	0.242176	0.648077	0.566108	0.216988	0.750774	0.509774	0.585227	0.0453468	0.262527	0.326384	0.985374	0.161214	0.110433	0.560526	0.0852207	0.067383	0.681875	0.429856	0.777612	0.0177095	0.334746	0.87564	0.421411	0.26764	0.190951	0.300032	0.26815	0.0205111	0.519011	0.638328	0.178839	0.026628	0.14979	0.694636	0.303544

## Sheet: 3.GRASSLAND
	Baseline												2020												2050												2080
	RCP 8.5				RCP 6.0				RCP 4.5				RCP 8.5				RCP 6.0				RCP 4.5				RCP 8.5				RCP 6.0				RCP 4.5				RCP 8.5				RCP 6.0				RCP 4.5
###	D1	D2	D3	D4	D1	D2	D3	D4	D1	D2	D3	D4	D1	D2	D3	D4	D1	D2	D3	D4	D1	D2	D3	D4	D1	D2	D3	D4	D1	D2	D3	D4	D1	D2	D3	D4	D1	D2	D3	D4	D1	D2	D3	D4	D1	D2	D3	D4
Aal	-0.202929	-0.202929	-0.202929	-0.177279	-0.220086	-0.220086	-0.207089	-0.191273	-0.249134	-0.385068	-0.366704	-0.436749	-0.335102	-0.320924	-0.320924	-0.320924	-0.34027	-0.326073	-0.317813	-0.448907	-0.435192	-0.428342	-0.441842	-0.498722	-0.460328	-0.52261	-0.53975	-0.601172	-0.498655	-0.525743	-0.523816	-0.512347	-0.487303	-0.490648	-0.471499	-0.460382	-0.333109	-0.335446	-0.30068	-0.285136	-0.365571	-0.346964	-0.351215	-0.412462	-0.351637	-0.467432	-0.470088	-0.531962
Gpy	-0.145448	-0.13969	-0.0280071	0.0649294	-0.114818	-0.0521273	0.026653	-0.0185145	-0.151466	-0.118749	0.0231874	-0.10235	-0.162822	-0.170521	-0.0949789	-0.100527	-0.130355	-0.103428	-0.0827395	-0.102651	-0.153195	-0.136829	-0.0649756	-0.0513064	-0.179491	-0.164255	-0.10654	-0.0355592	-0.170781	-0.101128	-0.120866	-0.0464805	-0.156968	-0.127	-0.0730056	-0.0602022	-0.201161	-0.242693	-0.189687	-0.198003	-0.207091	-0.238488	-0.193676	-0.201711	-0.234545	-0.217773	-0.261679	-0.232734
Lti	NA	NA	NA	NA	NA	NA	NA	NA	NA	NA	NA	NA	NA	NA	NA	NA	NA	NA	NA	NA	NA	NA	NA	NA	NA	NA	NA	NA	NA	NA	NA	NA	NA	NA	NA	NA	NA	NA	NA	NA	NA	NA	NA	NA	NA	NA	NA	NA
Sci	NA	NA	NA	NA	NA	NA	NA	NA	NA	NA	NA	NA	NA	NA	NA	NA	NA	NA	NA	NA	NA	NA	NA	NA	NA	NA	NA	NA	NA	NA	NA	NA	NA	NA	NA	NA	NA	NA	NA	NA	NA	NA	NA	NA	NA	NA	NA	NA
Pvo	NA	NA	NA	NA	NA	NA	NA	NA	NA	NA	NA	NA	NA	NA	NA	NA	NA	NA	NA	NA	NA	NA	NA	NA	NA	NA	NA	NA	NA	NA	NA	NA	NA	NA	NA	NA	NA	NA	NA	NA	NA	NA	NA	NA	NA	NA	NA	NA
Cfi	NA	NA	NA	NA	NA	NA	NA	NA	NA	NA	NA	NA	NA	NA	NA	NA	NA	NA	NA	NA	NA	NA	NA	NA	NA	NA	NA	NA	NA	NA	NA	NA	NA	NA	NA	NA	NA	NA	NA	NA	NA	NA	NA	NA	NA	NA	NA	NA
Ccr	NA	NA	NA	NA	NA	NA	NA	NA	NA	NA	NA	NA	NA	NA	NA	NA	NA	NA	NA	NA	NA	NA	NA	NA	NA	NA	NA	NA	NA	NA	NA	NA	NA	NA	NA	NA	NA	NA	NA	NA	NA	NA	NA	NA	NA	NA	NA	NA
Mca	-0.376261	-0.400937	-0.396429	-0.543695	-0.409742	-0.385108	-0.468659	-0.401811	-0.329112	-0.342923	-0.306817	-0.536258	-0.400837	-0.440524	-0.458791	-0.656969	-0.417074	-0.515038	-0.500581	-0.568453	-0.352888	-0.33077	-0.475305	-0.537463	-0.474581	-0.496648	-0.635943	-0.722897	-0.56617	-0.639317	-0.686576	-0.663167	-0.485309	-0.45226	-0.527511	-0.573982	-0.501569	-0.520737	-0.543994	-0.756533	-0.493487	-0.484992	-0.556975	-0.631349	-0.590677	-0.602237	-0.532369	-0.650074
Mav	NA	NA	NA	NA	NA	NA	NA	NA	NA	NA	NA	NA	NA	NA	NA	NA	NA	NA	NA	NA	NA	NA	NA	NA	NA	NA	NA	NA	NA	NA	NA	NA	NA	NA	NA	NA	NA	NA	NA	NA	NA	NA	NA	NA	NA	NA	NA	NA
Dni	NA	NA	NA	NA	NA	-0.180165	-0.17324	-0.118073	-0.124715	-0.0971298	0.0100748	-0.0267944	NA	NA	NA	NA	NA	NA	NA	NA	NA	-0.0971298	0.00713391	-0.0285016	NA	NA	NA	NA	NA	NA	NA	NA	NA	-0.0961915	0.00924958	-0.0244628	NA	NA	NA	NA	NA	NA	NA	NA	-0.126675	-0.0985703	0.00295618	-0.0296485
Sbe	NA	NA	NA	NA	NA	NA	NA	NA	NA	NA	NA	NA	NA	NA	NA	NA	NA	NA	NA	NA	NA	NA	NA	NA	NA	NA	NA	NA	NA	NA	NA	NA	NA	NA	NA	NA	NA	NA	NA	NA	NA	NA	NA	NA	NA	NA	NA	NA
Hcr	0.104032	0.107803	0.113818	0.0949574	0.182235	0.124494	0.0732505	0.0786425	0.0878004	0.10715	0.0446465	0.0183829	0.152514	0.175166	0.138878	0.149984	0.201177	0.154913	0.120073	0.166895	0.123939	0.104905	0.0768622	0.0628073	0.270332	0.269618	0.304225	0.352451	0.256339	0.259431	0.254813	0.341579	0.166108	0.198293	0.187737	0.224661	0.194578	0.229089	0.276985	0.313131	0.15007	0.191428	0.232849	0.322071	0.184316	0.217397	0.228913	0.308326
Cau	NA	NA	NA	NA	NA	NA	NA	NA	NA	NA	NA	NA	NA	NA	NA	NA	NA	NA	NA	NA	NA	NA	NA	NA	NA	NA	NA	NA	NA	NA	NA	NA	NA	NA	NA	NA	NA	NA	NA	NA	NA	NA	NA	NA	NA	NA	NA	NA
Clu	NA	NA	NA	NA	NA	NA	NA	NA	NA	NA	NA	NA	NA	NA	NA	NA	NA	NA	NA	NA	NA	NA	NA	NA	NA	NA	NA	NA	NA	NA	NA	NA	NA	NA	NA	NA	NA	NA	NA	NA	NA	NA	NA	NA	NA	NA	NA	NA
Ala	NA	NA	NA	NA	NA	NA	NA	NA	NA	NA	NA	NA	NA	NA	NA	NA	NA	NA	NA	NA	NA	NA	NA	NA	NA	NA	NA	NA	NA	NA	NA	NA	NA	NA	NA	NA	NA	NA	NA	NA	NA	NA	NA	NA	NA	NA	NA	NA
Uar	NA	NA	NA	NA	NA	NA	NA	NA	NA	NA	NA	NA	NA	NA	NA	NA	NA	NA	NA	NA	NA	NA	NA	NA	NA	NA	NA	NA	NA	NA	NA	NA	NA	NA	NA	NA	NA	NA	NA	NA	NA	NA	NA	NA	NA	NA	NA	NA
Mlu	0.182344	NA	0.219028	-0.0781291	0.0245324	0.0595389	NA	0.175439	-0.116918	-0.138162	-0.0935745	0.0438128	-0.080899	0.0101965	0.0581904	0.0214906	0.0780521	0.122586	0.169615	0.108991	-0.124372	-0.0870822	0.0758623	0.0792846	NA	0.355508	0.178255	0.200578	NA	NA	NA	0.0522297	-0.08778	-0.0934736	-0.0188581	-0.22222	0.206671	0.239292	0.350028	0.393849	0.116903	-0.0641759	0.0252625	0.117031	-0.116241	-0.122473	0.0310641	0.0520862
Mpu	NA	NA	NA	NA	NA	NA	NA	NA	NA	NA	NA	NA	NA	NA	NA	NA	NA	NA	NA	NA	NA	NA	NA	NA	NA	NA	NA	NA	NA	NA	NA	NA	NA	NA	NA	NA	NA	NA	NA	NA	NA	NA	NA	NA	NA	NA	NA	NA
Mma	NA	NA	NA	NA	NA	NA	NA	NA	NA	NA	NA	NA	NA	NA	NA	NA	NA	NA	NA	NA	NA	NA	NA	NA	NA	NA	NA	NA	NA	NA	NA	NA	NA	NA	NA	NA	NA	NA	NA	NA	NA	NA	NA	NA	NA	NA	NA	NA
Ggu	NA	NA	NA	NA	NA	NA	NA	NA	NA	NA	NA	NA	NA	NA	NA	NA	NA	NA	NA	NA	NA	NA	NA	NA	NA	NA	NA	NA	NA	NA	NA	NA	NA	NA	NA	NA	NA	NA	NA	NA	NA	NA	NA	NA	NA	NA	NA	NA
Llu	NA	NA	NA	NA	NA	NA	NA	NA	NA	NA	NA	NA	NA	NA	NA	NA	NA	NA	NA	NA	NA	NA	NA	NA	NA	NA	NA	NA	NA	NA	NA	NA	NA	NA	NA	NA	NA	NA	NA	NA	NA	NA	NA	NA	NA	NA	NA	NA
Fsi	-0.138039	-0.199798	-0.170935	-0.0716457	-0.225563	-0.194193	-0.22932	-0.0676609	-0.0228622	-0.0203822	-0.0257075	0.0958608	-0.243964	-0.273365	-0.259018	-0.0689736	-0.229104	-0.184566	-0.2083	-0.0216	-0.15704	0.0343736	0.0684504	0.175576	-0.411884	-0.426588	-0.332908	-0.14415	-0.261099	-0.228316	-0.194863	0.0187865	-0.167405	-0.0631586	-0.0188039	0.0726993	-0.411642	-0.418764	-0.30607	-0.129942	-0.391133	-0.391791	-0.403055	-0.254316	-0.181884	-0.152493	-0.0691015	-0.0223346
Lly	NA	NA	NA	NA	NA	NA	NA	NA	NA	NA	NA	NA	NA	NA	NA	NA	NA	NA	NA	NA	NA	NA	NA	NA	NA	NA	NA	NA	NA	NA	NA	NA	NA	NA	NA	NA	NA	NA	NA	NA	NA	NA	NA	NA	NA	NA	NA	NA
Lpa	-0.641495	-1.04511	-0.311397	-0.183304	0.179393	0.345189	-0.035906	NA	0.24344	NA	0.17035	-0.528991	-0.195422	-0.453572	0.0231738	-0.0340254	-0.143071	-0.00984266	0.674253	NA	-0.218385	0.694274	0.626702	-0.348873	-0.382034	NA	NA	NA	0.424567	-0.108565	0.434384	-0.490494	0.273776	-0.445076	-0.439179	-0.490108	NA	NA	NA	NA	0.611824	0.675858	0.527913	-0.183051	0.0491181	NA	-0.306796	-1.58643
Hic	0.0979264	-0.073028	-0.283717	-0.389016	-0.00838236	-0.146706	-0.424057	-0.154683	-0.130533	-0.0868225	-0.252974	-0.165475	-0.0485027	0.00211181	-0.174786	0.156903	0.0371936	0.00220273	-0.122075	-0.0766281	-0.203158	0.214877	0.138756	0.174893	-0.211779	-0.0293609	0.103296	0.354603	0.00370745	0.0635935	0.0749073	0.324002	-0.0415016	0.146456	0.398155	0.432232	-0.389786	-0.272137	-0.20154	0.213727	0.0118641	-0.119378	-0.0555772	0.0816285	0.12259	0.0213415	0.273722	-0.122095
Gge	NA	NA	NA	NA	NA	NA	NA	NA	NA	NA	NA	NA	NA	NA	NA	NA	NA	NA	NA	NA	NA	NA	NA	NA	NA	NA	NA	NA	NA	NA	NA	NA	NA	NA	NA	NA	NA	NA	NA	NA	NA	NA	NA	NA	NA	NA	NA	NA
Rru	NA	NA	NA	NA	NA	NA	NA	NA	NA	NA	NA	NA	NA	NA	NA	NA	NA	NA	NA	NA	NA	NA	NA	NA	NA	NA	NA	NA	NA	NA	NA	NA	NA	NA	NA	NA	NA	NA	NA	NA	NA	NA	NA	NA	NA	NA	NA	NA
Cib	-0.00179896	NA	NA	-0.0268187	NA	-0.0775146	NA	-0.0780128	-0.20281	-0.0117183	NA	0.0632525	-0.152498	NA	NA	NA	NA	NA	-0.155026	NA	-0.182052	NA	NA	NA	-0.00293183	0.154113	0.285921	0.299755	NA	NA	0.25505	0.216186	0.0355571	0.0218744	0.0254444	-0.158174	NA	NA	NA	NA	NA	NA	NA	NA	0.177477	0.0748573	0.0690728	-0.0168272
Cpy	0.069783	NA	0.495267	0.521498	-0.237659	0.144998	NA	-0.483875	-0.222221	-0.445791	-0.369952	0.479522	0.0110246	0.128833	0.204034	NA	-0.211079	-0.0858906	-0.443564	0.0327882	-0.194145	-0.476523	-0.228466	0.257305	-0.51928	-0.498338	NA	-0.499842	-0.119971	0.177673	-0.130876	-0.509864	0.132939	-0.340652	0.251315	0.445028	-0.149351	0.197726	-0.145696	-0.244494	-0.83366	-0.535068	-0.618702	-0.442635	-0.437021	-0.406063	-0.092476	-0.0843238
Oam	0.126867	0.130347	-0.114994	0.00723603	-0.138837	NA	0.0800058	-0.28154	-0.167942	-0.213945	NA	NA	NA	NA	NA	NA	-0.0859929	-0.0354412	NA	NA	NA	NA	NA	NA	NA	NA	0.00861722	-0.0453759	-0.0700995	-0.0501627	NA	NA	NA	NA	NA	NA	NA	NA	NA	NA	NA	NA	NA	NA	-0.164968	NA	NA	NA
P VALUES
###	V1	V2	V3	V4	V5	V6	V7	V8	V9	V10	V11	V12	V17	V18	V19	V20	V21	V22	V23	V24	V25	V26	V27	V28	V33	V34	V35	V36	V37	V38	V39	V40	V41	V42	V43	V44	V49	V50	V51	V52	V53	V54	V55	V56	V57	V58	V59	V60
Aal	0.539915	0.539915	0.539915	0.767793	0.560162	0.560162	0.52666	0.511429	0.46925	0.194583	0.317005	0.257585	0.0244585	0.0437834	0.0437834	0.0437834	0.0236732	0.0426158	0.0351588	0.0196231	0.0245555	0.0392298	0.0373733	0.0310961	0.0071919	0.00514144	0.00288246	0.00218506	0.00605664	0.00600556	0.00639396	0.0120327	0.0110987	0.0102557	0.0208399	0.0317892	0.0169694	0.0166647	0.0207573	0.0252553	0.0157518	0.0129689	0.00837086	0.00228711	0.0353694	0.00994708	0.00963051	0.00221741
Gpy	0.346996	0.275582	0.726875	0.239996	0.421522	0.534517	0.52616	0.592935	0.308784	0.603138	0.358923	0.745305	0.160909	0.0701389	0.414017	0.700675	0.349939	0.188849	0.611893	0.678498	0.373535	0.320921	0.582883	0.972774	0.035757	0.0281229	0.227473	0.706269	0.0828196	0.106913	0.436554	0.849122	0.117038	0.278964	0.621372	0.899482	0.0262457	0.00420012	0.0700673	0.212296	0.0497324	0.0179749	0.248479	0.312782	0.0200986	0.0255803	0.0574885	0.210958
Lti	NA	NA	NA	NA	NA	NA	NA	NA	NA	NA	NA	NA	NA	NA	NA	NA	NA	NA	NA	NA	NA	NA	NA	NA	NA	NA	NA	NA	NA	NA	NA	NA	NA	NA	NA	NA	NA	NA	NA	NA	NA	NA	NA	NA	NA	NA	NA	NA
Sci	NA	NA	NA	NA	NA	NA	NA	NA	NA	NA	NA	NA	NA	NA	NA	NA	NA	NA	NA	NA	NA	NA	NA	NA	NA	NA	NA	NA	NA	NA	NA	NA	NA	NA	NA	NA	NA	NA	NA	NA	NA	NA	NA	NA	NA	NA	NA	NA
Pvo	NA	NA	NA	NA	NA	NA	NA	NA	NA	NA	NA	NA	NA	NA	NA	NA	NA	NA	NA	NA	NA	NA	NA	NA	NA	NA	NA	NA	NA	NA	NA	NA	NA	NA	NA	NA	NA	NA	NA	NA	NA	NA	NA	NA	NA	NA	NA	NA
Cfi	NA	NA	NA	NA	NA	NA	NA	NA	NA	NA	NA	NA	NA	NA	NA	NA	NA	NA	NA	NA	NA	NA	NA	NA	NA	NA	NA	NA	NA	NA	NA	NA	NA	NA	NA	NA	NA	NA	NA	NA	NA	NA	NA	NA	NA	NA	NA	NA
Ccr	NA	NA	NA	NA	NA	NA	NA	NA	NA	NA	NA	NA	NA	NA	NA	NA	NA	NA	NA	NA	NA	NA	NA	NA	NA	NA	NA	NA	NA	NA	NA	NA	NA	NA	NA	NA	NA	NA	NA	NA	NA	NA	NA	NA	NA	NA	NA	NA
Mca	0.00046845	0.0004181	0.00319245	0.000677389	0.000155732	0.00196706	0.000835167	0.0190071	0.00585721	0.00937242	0.10991	0.00481866	8.97856e-05	6.65915e-05	0.000230004	4.67859e-05	6.26797e-05	0.000123001	0.000259427	0.000566186	0.00171729	0.00852902	0.00868752	0.00318461	2.62179e-06	6.99824e-06	5.01811e-06	1.97374e-06	2.91773e-07	1.63383e-06	1.72312e-06	6.97868e-05	4.18903e-05	0.000395646	0.00429764	0.00306575	1.02075e-05	1.55976e-05	0.000233795	1.19986e-06	6.40065e-05	0.000358291	0.0001472	0.000299568	2.36975e-06	1.98619e-05	0.00179641	0.000478014
Mav	NA	NA	NA	NA	NA	NA	NA	NA	NA	NA	NA	NA	NA	NA	NA	NA	NA	NA	NA	NA	NA	NA	NA	NA	NA	NA	NA	NA	NA	NA	NA	NA	NA	NA	NA	NA	NA	NA	NA	NA	NA	NA	NA	NA	NA	NA	NA	NA
Dni	NA	NA	NA	NA	NA	0.113604	0.10825	0.674819	0.15474	0.333996	0.791922	0.974449	NA	NA	NA	NA	NA	NA	NA	NA	NA	0.333996	0.812491	0.965141	NA	NA	NA	NA	NA	NA	NA	NA	NA	0.360544	0.797893	0.991353	NA	NA	NA	NA	NA	NA	NA	NA	0.121932	0.29674	0.841589	0.956756
Sbe	NA	NA	NA	NA	NA	NA	NA	NA	NA	NA	NA	NA	NA	NA	NA	NA	NA	NA	NA	NA	NA	NA	NA	NA	NA	NA	NA	NA	NA	NA	NA	NA	NA	NA	NA	NA	NA	NA	NA	NA	NA	NA	NA	NA	NA	NA	NA	NA
Hcr	0.257177	0.316163	0.321008	0.378961	0.0686115	0.190653	0.593198	0.489775	0.217919	0.231703	0.617924	0.873319	0.233588	0.207094	0.389376	0.341005	0.0924171	0.235434	0.575098	0.260825	0.293427	0.506123	0.759208	0.721093	0.0232233	0.0306952	0.0237939	0.0134206	0.0574871	0.0429612	0.0829501	0.0167625	0.166711	0.095137	0.15313	0.0948663	0.0314553	0.0418866	0.018779	0.00727605	0.119119	0.0880229	0.0707919	0.0085119	0.0668216	0.0471274	0.0997313	0.0171903
Cau	NA	NA	NA	NA	NA	NA	NA	NA	NA	NA	NA	NA	NA	NA	NA	NA	NA	NA	NA	NA	NA	NA	NA	NA	NA	NA	NA	NA	NA	NA	NA	NA	NA	NA	NA	NA	NA	NA	NA	NA	NA	NA	NA	NA	NA	NA	NA	NA
Clu	NA	NA	NA	NA	NA	NA	NA	NA	NA	NA	NA	NA	NA	NA	NA	NA	NA	NA	NA	NA	NA	NA	NA	NA	NA	NA	NA	NA	NA	NA	NA	NA	NA	NA	NA	NA	NA	NA	NA	NA	NA	NA	NA	NA	NA	NA	NA	NA
Ala	NA	NA	NA	NA	NA	NA	NA	NA	NA	NA	NA	NA	NA	NA	NA	NA	NA	NA	NA	NA	NA	NA	NA	NA	NA	NA	NA	NA	NA	NA	NA	NA	NA	NA	NA	NA	NA	NA	NA	NA	NA	NA	NA	NA	NA	NA	NA	NA
Uar	NA	NA	NA	NA	NA	NA	NA	NA	NA	NA	NA	NA	NA	NA	NA	NA	NA	NA	NA	NA	NA	NA	NA	NA	NA	NA	NA	NA	NA	NA	NA	NA	NA	NA	NA	NA	NA	NA	NA	NA	NA	NA	NA	NA	NA	NA	NA	NA
Mlu	0.154323	NA	0.095311	0.307205	0.486419	0.654838	NA	0.843876	0.0270288	0.0920145	0.792626	0.195274	0.970325	0.366517	0.113695	0.380176	0.857707	0.661368	0.160158	0.462985	0.210445	0.0140079	0.00964214	0.0246453	NA	0.0847069	0.286776	0.254192	NA	NA	NA	0.92653	0.0687213	0.214929	0.789708	0.549916	0.396915	0.24909	0.038636	0.0544674	0.939367	0.637998	0.828736	0.575061	0.538619	0.484142	0.68969	0.354033
Mpu	NA	NA	NA	NA	NA	NA	NA	NA	NA	NA	NA	NA	NA	NA	NA	NA	NA	NA	NA	NA	NA	NA	NA	NA	NA	NA	NA	NA	NA	NA	NA	NA	NA	NA	NA	NA	NA	NA	NA	NA	NA	NA	NA	NA	NA	NA	NA	NA
Mma	NA	NA	NA	NA	NA	NA	NA	NA	NA	NA	NA	NA	NA	NA	NA	NA	NA	NA	NA	NA	NA	NA	NA	NA	NA	NA	NA	NA	NA	NA	NA	NA	NA	NA	NA	NA	NA	NA	NA	NA	NA	NA	NA	NA	NA	NA	NA	NA
Ggu	NA	NA	NA	NA	NA	NA	NA	NA	NA	NA	NA	NA	NA	NA	NA	NA	NA	NA	NA	NA	NA	NA	NA	NA	NA	NA	NA	NA	NA	NA	NA	NA	NA	NA	NA	NA	NA	NA	NA	NA	NA	NA	NA	NA	NA	NA	NA	NA
Llu	NA	NA	NA	NA	NA	NA	NA	NA	NA	NA	NA	NA	NA	NA	NA	NA	NA	NA	NA	NA	NA	NA	NA	NA	NA	NA	NA	NA	NA	NA	NA	NA	NA	NA	NA	NA	NA	NA	NA	NA	NA	NA	NA	NA	NA	NA	NA	NA
Fsi	0.00153147	0.000441743	0.06005	0.967289	0.00158001	0.0320148	0.0757751	0.70373	0.0110798	0.0212344	0.0673144	0.683291	0.000121835	8.48784e-05	0.0133368	0.763249	0.00299649	0.123589	0.218735	1	0.00151053	0.0667085	0.313236	0.758755	5.15154e-07	1.1295e-06	0.000542062	0.596651	0.000158627	0.00825165	0.0579721	0.135841	0.000273924	0.0217251	0.137455	0.800852	9.32571e-06	2.73043e-05	0.00320936	0.390803	5.75766e-05	0.00160422	0.00301851	0.013623	8.96139e-05	0.000832451	0.00662376	0.0388972
Lly	NA	NA	NA	NA	NA	NA	NA	NA	NA	NA	NA	NA	NA	NA	NA	NA	NA	NA	NA	NA	NA	NA	NA	NA	NA	NA	NA	NA	NA	NA	NA	NA	NA	NA	NA	NA	NA	NA	NA	NA	NA	NA	NA	NA	NA	NA	NA	NA
Lpa	0.11699	0.0486271	0.542526	0.615814	0.981374	0.687869	0.511702	0.772445	0.902655	0.226991	0.778294	0.185017	0.235013	0.155363	0.480243	0.905501	0.278332	0.602726	0.685627	0.243243	0.286127	0.62309	0.95217	0.28349	0.612106	NA	NA	NA	0.68654	0.429402	0.797516	0.159512	0.507912	0.670014	0.234231	0.2319	0.758022	NA	NA	NA	0.78701	0.688007	0.674577	0.368643	0.737098	0.59355	0.295277	0.027597
Hic	0.481541	0.993692	0.16698	0.040895	0.88364	0.983316	0.0225471	0.214843	0.516657	0.871855	0.112415	0.188694	0.789631	0.723032	0.230962	0.806256	0.903648	0.755957	0.145009	0.149716	0.196534	0.748398	0.541339	0.439092	0.0677833	0.60901	0.874444	0.782013	0.669419	0.752699	0.886268	0.583247	0.131428	0.543721	0.500683	0.197709	0.0173755	0.121655	0.234734	0.891745	0.543741	0.205521	0.109787	0.358692	0.501916	0.202032	0.979154	0.248914
Gge	NA	NA	NA	NA	NA	NA	NA	NA	NA	NA	NA	NA	NA	NA	NA	NA	NA	NA	NA	NA	NA	NA	NA	NA	NA	NA	NA	NA	NA	NA	NA	NA	NA	NA	NA	NA	NA	NA	NA	NA	NA	NA	NA	NA	NA	NA	NA	NA
Rru	NA	NA	NA	NA	NA	NA	NA	NA	NA	NA	NA	NA	NA	NA	NA	NA	NA	NA	NA	NA	NA	NA	NA	NA	NA	NA	NA	NA	NA	NA	NA	NA	NA	NA	NA	NA	NA	NA	NA	NA	NA	NA	NA	NA	NA	NA	NA	NA
Cib	0.278302	NA	NA	0.62441	NA	0.514795	NA	0.786829	0.966149	0.48291	NA	0.346942	0.871669	NA	NA	NA	NA	NA	0.855584	NA	1	NA	NA	NA	0.920158	0.594324	0.238068	0.273184	NA	NA	0.260733	0.45919	0.628624	0.687729	0.685653	0.639737	NA	NA	NA	NA	NA	NA	NA	NA	0.426857	0.492273	0.527648	0.84057
Cpy	0.412019	NA	0.472242	0.724878	0.469726	0.381696	NA	0.529362	0.571695	0.110968	0.763797	0.614261	0.15902	0.461145	0.64442	0.882038	0.0904242	0.0606859	0.0948565	0.325375	0.412319	0.0395644	0.327446	0.894318	0.0579742	0.260352	0.145795	0.375233	0.570249	0.960897	0.299776	0.194897	0.456332	0.198204	0.952211	0.496658	0.0700112	0.262321	0.108008	0.0581007	0.000319787	0.00782441	0.0748875	0.00709815	0.147207	0.077959	0.239917	0.438735
Oam	0.824159	0.767943	0.0966017	0.127702	0.895061	NA	0.808623	0.301971	0.938786	0.152673	NA	NA	NA	NA	NA	NA	0.418997	0.632982	NA	NA	NA	NA	NA	NA	NA	NA	0.390513	0.250928	0.450912	0.560372	NA	NA	NA	NA	NA	NA	NA	NA	NA	NA	NA	NA	NA	NA	0.508171	NA	NA	NA

## Sheet: 4.FOREST
	Baseline												2020												2050												2080
	RCP 8.5				RCP 6.0				RCP 4.5				RCP 8.5				RCP 6.0				RCP 4.5				RCP 8.5				RCP 6.0				RCP 4.5				RCP 8.5				RCP 6.0				RCP 4.5
###	D1	D2	D3	D4	D1	D2	D3	D4	D1	D2	D3	D4	D1	D2	D3	D4	D1	D2	D3	D4	D1	D2	D3	D4	D1	D2	D3	D4	D1	D2	D3	D4	D1	D2	D3	D4	D1	D2	D3	D4	D1	D2	D3	D4	D1	D2	D3	D4
Aal	-0.0731016	-0.0731016	-0.0731016	-0.0303208	-0.105912	-0.105912	-0.0717058	-0.0633826	-0.0459517	-0.0790228	-0.0795908	-0.00597852	-0.227222	-0.202382	-0.202382	-0.202382	-0.248215	-0.224267	-0.201546	-0.192974	-0.20761	-0.150158	-0.128144	-0.182642	-0.193675	-0.196215	-0.329968	-0.393914	-0.244832	-0.217299	-0.219247	-0.238375	-0.296648	-0.325722	-0.304185	-0.286878	-0.169794	-0.172683	-0.224408	-0.367892	-0.209203	-0.210731	-0.317373	-0.376741	-0.264494	-0.241113	-0.240617	-0.342835
Gpy	0.320294	0.318491	0.233471	0.186687	0.367025	0.288225	0.297641	0.332569	0.283039	0.269816	0.162619	0.192592	0.306745	0.284041	0.250087	0.26442	0.285186	0.224921	0.254925	0.317721	0.334812	0.332841	0.2282	0.290664	0.51866	0.472328	0.436185	0.474888	0.489036	0.417256	0.472943	0.506203	0.426899	0.418581	0.343995	0.394618	0.44203	0.446745	0.363884	0.401022	0.462138	0.390135	0.431927	0.472949	0.410508	0.383326	0.272408	0.339549
Lti	NA	NA	NA	NA	NA	NA	NA	NA	NA	NA	NA	NA	NA	NA	NA	NA	NA	NA	NA	NA	NA	NA	NA	NA	NA	NA	NA	NA	NA	NA	NA	NA	NA	NA	NA	NA	NA	NA	NA	NA	NA	NA	NA	NA	NA	NA	NA	NA
Sci	NA	NA	NA	NA	NA	NA	NA	NA	NA	NA	NA	NA	NA	NA	NA	NA	NA	NA	NA	NA	NA	NA	NA	NA	NA	NA	NA	NA	NA	NA	NA	NA	NA	NA	NA	NA	NA	NA	NA	NA	NA	NA	NA	NA	NA	NA	NA	NA
Pvo	0.294797	0.283177	0.264192	0.342452	0.257416	0.2517	0.254098	0.267773	NA	NA	NA	NA	0.302717	0.366022	0.345285	0.358119	0.192826	0.187441	0.199284	0.199284	NA	NA	NA	NA	0.327867	0.348166	0.331847	0.344032	0.134535	0.143873	0.127924	0.127924	NA	NA	NA	NA	0.373814	0.373814	0.373814	0.37257	0.115938	0.125989	0.124633	0.12311	NA	NA	NA	NA
Cfi	NA	-0.0570178	0.11553	0.0584117	NA	NA	-0.10045	-0.0288801	NA	NA	0.446604	0.817741	NA	-0.147463	0.0460242	0.0343041	NA	NA	-0.0536078	0.0450185	NA	NA	0.574896	0.904083	NA	-0.147463	0.108808	0.0596543	NA	NA	-0.0372032	0.0375922	NA	NA	0.574896	0.948829	NA	-0.263866	0.0614374	-0.0379773	NA	NA	0.0306402	0.130244	NA	NA	0.536661	0.879039
Ccr	NA	NA	NA	NA	NA	NA	NA	NA	NA	NA	NA	NA	NA	NA	NA	NA	NA	NA	NA	NA	NA	NA	NA	NA	NA	NA	NA	NA	NA	NA	NA	NA	NA	NA	NA	NA	NA	NA	NA	NA	NA	NA	NA	NA	NA	NA	NA	NA
Mca	-0.239198	-0.287647	-0.631427	-0.590192	-0.20567	-0.321754	-0.357489	-0.537115	-0.121412	-0.229647	-0.191777	-0.311849	-0.230047	-0.316339	-0.641802	-0.570321	-0.20528	-0.201242	-0.299536	-0.552875	-0.181115	-0.241797	-0.207508	-0.266749	-0.205378	-0.321453	-0.437457	-0.380136	-0.255034	-0.308308	-0.360961	-0.330982	-0.184374	-0.284155	-0.248223	-0.186794	-0.229691	-0.271566	-0.34008	-0.290877	-0.25116	-0.283878	-0.360984	-0.315679	-0.20476	-0.289078	-0.259313	-0.19757
Mav	NA	NA	NA	NA	NA	NA	NA	NA	NA	NA	NA	NA	NA	NA	NA	NA	NA	NA	NA	NA	NA	NA	NA	NA	NA	NA	NA	NA	NA	NA	NA	NA	NA	NA	NA	NA	NA	NA	NA	NA	NA	NA	NA	NA	NA	NA	NA	NA
Dni	-0.0636605	-0.0963408	-0.174027	-0.240762	-0.0278767	-0.0277957	-0.0933152	-0.131328	-0.107622	-0.150777	-0.217926	-0.175956	-0.122277	-0.157222	-0.254995	-0.349558	-0.0827244	-0.121262	-0.214024	-0.236762	-0.122585	-0.181641	-0.252077	-0.15375	-0.103915	-0.123598	-0.153791	-0.220343	-0.0207376	-0.117605	-0.1917	-0.219483	-0.0770513	-0.14399	-0.23587	-0.161855	-0.0902439	-0.154545	-0.208104	-0.30806	-0.0606564	-0.0916025	-0.180505	-0.229982	-0.110741	-0.169906	-0.232865	-0.148124
Sbe	NA	NA	NA	NA	NA	NA	NA	NA	NA	NA	NA	NA	NA	NA	NA	NA	NA	NA	NA	NA	NA	NA	NA	NA	NA	NA	NA	NA	NA	NA	NA	NA	NA	NA	NA	NA	NA	NA	NA	NA	NA	NA	NA	NA	NA	NA	NA	NA
Hcr	-0.292435	-0.192263	-0.136466	-0.0750622	-0.276164	-0.169209	-0.127599	-0.108178	-0.201527	-0.121686	-0.11176	-0.143244	-0.200216	-0.0730469	-0.0418923	0.043359	-0.189059	-0.0946802	-0.0554751	-0.0252758	-0.146385	-0.0367956	-0.0407059	-0.0426389	-0.180418	-0.109889	-0.0688915	0.14261	-0.166416	-0.100903	0.00461523	0.100249	-0.117119	-0.10463	-0.0244116	0.0562362	-0.14079	0.00512298	0.0667178	0.111842	-0.130322	-0.0052944	0.0174343	0.124546	-0.0745983	-0.0145525	0.0095328	0.0565641
Cau	NA	NA	NA	NA	NA	NA	NA	NA	NA	NA	NA	NA	NA	NA	NA	NA	NA	NA	NA	NA	NA	NA	NA	NA	NA	NA	NA	NA	NA	NA	NA	NA	NA	NA	NA	NA	NA	NA	NA	NA	NA	NA	NA	NA	NA	NA	NA	NA
Clu	0.171075	0.210788	0.282396	-0.320098	-0.259556	-0.383237	-0.56985	-0.655227	-0.33021	-0.358467	-0.417124	-0.434352	0.221512	0.21245	0.305863	-0.122557	-0.13335	-0.234556	-0.409386	-0.454105	-0.293963	-0.325443	-0.371087	-0.389565	0.126759	0.129037	0.224874	-0.122865	-0.309671	-0.394621	-0.603111	-0.584103	-0.388785	-0.418417	-0.450304	-0.369158	-0.00265099	-0.0466724	-0.213205	-0.488723	-0.349508	-0.44392	-0.628611	-0.758877	-0.429748	-0.46049	-0.521822	-0.511179
Ala	-0.120063	-0.0844553	-0.112952	-0.112952	-0.18506	0.548038	0.512554	0.00218434	-0.00236744	0.281487	-0.0407455	-0.190219	-0.00853403	-1.49464	0.0657895	NA	0.491964	0.82192	0.460758	-0.271084	-0.377978	-0.776935	-0.289488	0.716143	-0.132936	NA	NA	0.285078	0.289492	0.278376	NA	NA	-0.111223	NA	0.925442	0.403529	0.137876	NA	NA	NA	NA	-0.183495	NA	NA	0.105439	-0.299454	0.00326487	0.224591
Uar	NA	-0.205083	-0.247205	-0.225302	NA	NA	-0.323986	-0.320915	NA	NA	-0.36545	-0.331687	NA	-0.205083	-0.280557	-0.217064	NA	NA	-0.306002	-0.386133	NA	NA	-0.298611	-0.300954	NA	-0.224706	-0.275899	-0.22925	NA	NA	-0.355342	-0.401745	NA	NA	-0.643118	-0.373473	NA	-0.37224	-0.289815	-0.234396	NA	NA	-0.355342	-0.400855	NA	NA	-0.633493	-0.331687
Mlu	0.29229	0.475235	0.604546	0.665796	0.0590128	0.550964	0.69138	0.634684	0.435436	0.474526	0.442693	0.350249	0.137221	0.412379	0.614102	0.570676	0.120506	0.349623	0.473495	0.680171	0.471021	0.381218	0.21422	0.100547	0.290139	0.289806	0.434615	0.434794	-0.242443	0.272657	0.616207	0.414758	0.380864	0.333202	0.519794	0.465234	0.429699	0.53766	0.614993	0.325627	0.455548	0.483432	1.01683	0.337187	0.275665	0.258812	0.345465	0.103626
Mpu	NA	NA	NA	NA	NA	NA	NA	NA	NA	NA	NA	NA	NA	NA	NA	NA	NA	NA	NA	NA	NA	NA	NA	NA	NA	NA	NA	NA	NA	NA	NA	NA	NA	NA	NA	NA	NA	NA	NA	NA	NA	NA	NA	NA	NA	NA	NA	NA
Mma	NA	NA	NA	NA	NA	NA	NA	NA	NA	NA	NA	NA	NA	NA	NA	NA	NA	NA	NA	NA	NA	NA	NA	NA	NA	NA	NA	NA	NA	NA	NA	NA	NA	NA	NA	NA	NA	NA	NA	NA	NA	NA	NA	NA	NA	NA	NA	NA
Ggu	0.21024	0.526939	-0.27281	-0.241976	0.0231397	0.0208797	-0.540954	-0.325864	0.0289094	-0.219124	-0.233098	0.223425	-0.975133	-1.2895	-1.17071	-0.48938	-0.42021	-0.693459	-0.940437	-0.649019	-0.246788	-0.545102	-0.112178	-0.11391	NA	NA	0.857927	NA	-0.315181	-0.177922	0.315311	0.315311	0.000999163	-0.403332	-0.482233	-0.596053	-0.114656	NA	NA	0.359192	-0.0269103	0.192112	NA	NA	-0.0469219	-0.329576	-0.353957	-0.194427
Llu	-0.601768	-0.339313	-0.296083	-0.232609	-0.652042	-0.416657	-0.344209	-0.265369	-0.633799	-0.410482	-0.327235	-0.253654	-0.529116	-0.416646	-0.280192	-0.187854	-0.595861	-0.395408	-0.328741	-0.239024	-0.552289	-0.377843	-0.268993	-0.223669	-0.567254	-0.444575	-0.35394	-0.303986	-0.564969	-0.430745	-0.38702	-0.316129	-0.59894	-0.416414	-0.377628	-0.287928	-0.503431	-0.369486	-0.287103	-0.233437	-0.560373	-0.356686	-0.340068	-0.286199	-0.57541	-0.345654	-0.298885	-0.223745
Fsi	0.377468	0.307945	0.0428466	-0.131468	0.102812	0.0495679	0.196563	0.287965	0.293511	0.214547	0.0987935	-0.0572245	0.27042	0.143241	0.0244225	0.033827	-0.0776341	0.0565027	0.210868	0.244853	0.371995	0.218236	0.296745	-0.00045819	0.0936351	-0.252314	-0.400894	-0.319834	0.129406	0.166223	0.125343	0.200143	0.454085	0.356124	0.279386	0.197058	-0.058587	-0.221749	-0.271562	-0.378768	-0.237411	-0.232355	-0.275056	-0.238713	0.169262	0.207921	0.153057	-0.00804987
Lly	NA	NA	NA	NA	NA	NA	NA	NA	NA	NA	NA	NA	NA	NA	NA	NA	NA	NA	NA	NA	NA	NA	NA	NA	NA	NA	NA	NA	NA	NA	NA	NA	NA	NA	NA	NA	NA	NA	NA	NA	NA	NA	NA	NA	NA	NA	NA	NA
Lpa	0.567495	0.464875	0.870118	0.904916	0.689627	0.673924	0.21875	NA	0.579828	NA	0.522351	0.555319	0.167987	0.0271903	0.930563	0.0548907	0.202409	0.113203	0.814159	NA	-0.00271293	0.705133	0.585281	0.534983	1.15644	NA	NA	NA	0.615229	0.772125	-0.324701	1.01675	0.144754	0.608769	-0.360828	0.2272	NA	NA	NA	NA	0.699228	0.540808	0.762794	0.823383	0.466892	NA	0.140617	-0.0537602
Hic	0.172039	0.0831021	0.44441	0.29587	0.119335	0.100295	0.296466	0.120409	0.00613587	0.0026408	0.135303	0.27871	0.04129	-0.14055	0.200724	-0.318932	0.116396	-0.241135	-0.11604	-0.0261951	-0.0203135	-0.160317	-0.0305908	0.187264	-0.0346539	-0.0892879	-0.0455559	0.529337	-0.0148745	-0.00950771	0.535443	0.794057	-0.188078	0.146737	0.22912	0.564671	0.446171	0.818392	0.581685	0.602877	0.574388	0.483138	0.640491	0.674861	0.0465596	0.319815	0.394199	0.464532
Gge	-0.576088	-0.697008	-0.701914	-1.04774	-0.383473	-0.585469	-0.842925	-0.831328	-0.216356	-0.461733	-0.655375	-0.950612	-0.79881	-1.07116	-0.741117	-0.798974	-0.411852	-0.857728	-0.83085	-0.879359	-0.342149	-0.748676	-0.761164	-0.750054	-0.327317	-0.328079	-0.518447	-0.536314	-0.215462	-0.316348	-0.623949	-0.758481	-0.272686	-0.651668	-0.621598	-0.74259	-0.405678	-0.189131	-0.0415307	0.0787925	-0.298875	-0.166728	-0.460512	-0.335488	-0.0451742	-0.10285	-0.55906	-0.590771
Rru	-0.101201	-0.470464	-0.54877	0.0681469	-0.164146	-0.116695	0.343911	0.04992	-0.215311	-0.174862	-0.0836116	-0.0288	-0.211463	-0.465412	-0.249761	0.187972	-0.156455	-0.00809288	0.0683592	-0.113174	-0.11894	-0.234865	-0.168383	-0.016848	-0.0840469	-0.116369	-0.0501776	0.193477	-0.104305	0.0583777	0.132803	-0.014555	-0.0130845	-0.0849506	-0.0351048	-0.293648	-0.0321066	0.129902	0.204404	0.134607	-0.0344632	0.091611	0.0271754	-0.113114	0.0179627	-0.187169	-0.223922	-0.191426
Cib	0.0961644	0.0592678	0.310443	0.372811	0.0390883	0.0648208	0.151063	-0.141511	0.0480628	0.0494556	0.0594042	-0.0122303	0.126686	0.251249	0.179899	0.513179	0.152247	0.168379	0.0913347	-0.28139	0.0561156	0.0528306	0.155276	-0.21493	0.494522	0.32977	0.119532	0.095477	0.497998	0.261234	-0.0931453	-0.0611449	0.505578	0.239301	0.207855	-0.165999	0.483782	0.213327	0.0321048	0.109688	0.268001	0.152311	-0.205376	0.200274	0.167754	-0.123987	0.0285928	0.017589
Cpy	0.29274	NA	0.938614	0.545252	0.595639	0.447427	NA	0.719247	-0.127928	0.488662	-0.374379	0.392682	0.41095	0.774791	0.185973	NA	0.58015	0.421277	0.302853	-0.104302	-0.158514	0.0401942	0.0832353	-0.0360754	0.310949	0.164393	NA	-0.266584	-0.0671251	0.221063	-0.0816297	0.554642	-0.451015	0.115057	-0.086673	-0.261355	-0.18999	0.0449688	-0.463372	-0.694082	-0.23465	-0.388134	-0.649822	-0.345169	-0.539489	-0.222023	-0.637193	-0.817543
Oam	0.102003	0.382618	0.310357	0.31981	0.329439	0.194723	0.477448	0.0666291	0.37282	0.218114	0.348935	-0.0312641	-0.309268	0.19048	0.133782	0.369923	0.0964437	0.396529	-0.0780406	-0.398901	-0.0677788	0.0124142	0.106458	0.385843	-0.121073	0.121647	0.0996819	0.317297	0.136103	0.281206	-0.164138	-0.317015	0.0771324	-0.0225123	0.218402	0.19999	-0.0295014	-0.0771897	-0.343722	-0.447491	-0.177073	-0.0590013	-0.192306	0.037501	-0.0362786	0.281781	0.222608	-0.428258
P VALUES
###	V1	V2	V3	V4	V5	V6	V7	V8	V9	V10	V11	V12	V17	V18	V19	V20	V21	V22	V23	V24	V25	V26	V27	V28	V33	V34	V35	V36	V37	V38	V39	V40	V41	V42	V43	V44	V49	V50	V51	V52	V53	V54	V55	V56	V57	V58	V59	V60
Aal	0.770514	0.770514	0.770514	0.930365	0.572662	0.572662	0.798562	0.749419	0.974529	0.657929	0.55447	0.933705	0.103747	0.181013	0.181013	0.181013	0.0553999	0.102524	0.16204	0.159934	0.10365	0.330097	0.27161	0.178895	0.153632	0.11585	0.0455309	0.0389046	0.0563472	0.0732723	0.0718739	0.0713578	0.0141054	0.0077241	0.0119567	0.0173279	0.158333	0.152781	0.0834669	0.0274657	0.0963851	0.0872991	0.0366384	0.0202121	0.0198933	0.0364018	0.036743	0.0112147
Gpy	0.00155873	0.00105158	0.0307584	0.123593	0.000192909	0.00233534	0.00486456	0.00665982	0.00342978	0.00413841	0.110244	0.0886187	0.00114791	0.00196145	0.0132407	0.0181434	0.00284911	0.0123031	0.0119842	0.00586589	0.000843966	0.000494592	0.0243353	0.0102938	1.60085e-07	1.69913e-06	3.79899e-05	3.28332e-05	6.98234e-07	1.2586e-05	7.96401e-06	2.9902e-05	1.98915e-05	2.75e-05	0.000854977	0.000755625	2.83642e-05	8.10644e-06	0.00109826	0.000664545	8.03154e-06	8.83021e-05	8.85606e-05	5.73659e-05	0.000125556	0.000161298	0.0132506	0.0042105
Lti	NA	NA	NA	NA	NA	NA	NA	NA	NA	NA	NA	NA	NA	NA	NA	NA	NA	NA	NA	NA	NA	NA	NA	NA	NA	NA	NA	NA	NA	NA	NA	NA	NA	NA	NA	NA	NA	NA	NA	NA	NA	NA	NA	NA	NA	NA	NA	NA
Sci	NA	NA	NA	NA	NA	NA	NA	NA	NA	NA	NA	NA	NA	NA	NA	NA	NA	NA	NA	NA	NA	NA	NA	NA	NA	NA	NA	NA	NA	NA	NA	NA	NA	NA	NA	NA	NA	NA	NA	NA	NA	NA	NA	NA	NA	NA	NA	NA
Pvo	0.01248	0.017126	0.0245791	0.00523687	0.0153464	0.0120511	0.00849567	0.0077141	NA	NA	NA	NA	0.0190567	0.0109387	0.0203426	0.00997406	0.075476	0.0703031	0.0551024	0.0551024	NA	NA	NA	NA	0.0385664	0.0238769	0.0343057	0.0178584	0.136813	0.125831	0.190253	0.190253	NA	NA	NA	NA	0.00891896	0.00891896	0.00891896	0.00795034	0.341984	0.333395	0.330718	0.281759	NA	NA	NA	NA
Cfi	NA	0.464498	0.261261	0.163716	NA	0.986649	0.562805	0.651217	NA	NA	0.155247	4.37797e-06	NA	0.741977	0.329696	0.225824	NA	0.986649	0.129984	0.14849	NA	NA	0.00776361	5.42368e-07	NA	0.741977	0.201517	0.154665	NA	0.986649	0.0680509	0.185927	NA	NA	0.00776361	1.26732e-07	NA	0.709098	0.381983	0.436042	NA	0.5194	0.0312276	0.0547256	NA	NA	0.0211193	2.5806e-06
Ccr	NA	NA	NA	NA	NA	NA	NA	NA	NA	NA	NA	NA	NA	NA	NA	NA	NA	NA	NA	NA	NA	NA	NA	NA	NA	NA	NA	NA	NA	NA	NA	NA	NA	NA	NA	NA	NA	NA	NA	NA	NA	NA	NA	NA	NA	NA	NA	NA
Mca	0.000741885	7.41719e-05	4.6147e-07	9.60452e-06	0.000527788	2.95847e-05	7.25684e-06	2.75575e-05	0.0110738	0.00153835	0.00106184	6.24556e-05	0.000347735	1.88434e-05	8.35389e-07	3.72685e-05	0.0002591	0.000115916	5.38797e-05	0.000134807	0.00167677	0.0011046	0.000293646	0.000216023	7.50732e-05	6.16467e-07	2.52985e-08	1.60219e-06	5.65755e-06	2.68059e-07	1.07871e-07	1.95492e-06	0.000193326	7.0357e-05	1.82693e-05	0.000425905	6.79824e-05	6.95737e-06	2.80538e-06	3.83944e-06	6.21768e-06	4.21623e-06	5.95893e-07	3.62093e-06	0.000383735	3.04087e-05	1.47814e-05	0.000146201
Mav	NA	NA	NA	NA	NA	NA	NA	NA	NA	NA	NA	NA	NA	NA	NA	NA	NA	NA	NA	NA	NA	NA	NA	NA	NA	NA	NA	NA	NA	NA	NA	NA	NA	NA	NA	NA	NA	NA	NA	NA	NA	NA	NA	NA	NA	NA	NA	NA
Dni	0.799504	0.847762	0.342007	0.086844	0.671344	0.787576	0.783898	0.45221	0.702594	0.380001	0.135061	0.219983	0.996691	0.657898	0.149965	0.0201059	0.869747	0.884883	0.31482	0.228944	0.790374	0.286666	0.0790706	0.363662	0.994402	0.849286	0.647333	0.227277	0.537462	0.70316	0.314568	0.19811	0.937823	0.426686	0.0874558	0.2269	0.858524	0.671607	0.341605	0.047915	0.834533	0.945201	0.396143	0.15886	0.689425	0.275296	0.0899191	0.269907
Sbe	NA	NA	NA	NA	NA	NA	NA	NA	NA	NA	NA	NA	NA	NA	NA	NA	NA	NA	NA	NA	NA	NA	NA	NA	NA	NA	NA	NA	NA	NA	NA	NA	NA	NA	NA	NA	NA	NA	NA	NA	NA	NA	NA	NA	NA	NA	NA	NA
Hcr	0.0763803	0.437547	0.659523	0.947834	0.104964	0.579642	0.902228	0.705177	0.323278	0.832726	0.755731	0.646403	0.411921	0.650796	0.63075	0.361581	0.48439	0.867588	0.560876	0.781782	0.72922	0.422262	0.500299	0.554355	0.540714	0.990903	0.831909	0.169888	0.653651	0.96292	0.401535	0.268706	0.946952	0.933693	0.659396	0.281071	0.705586	0.274205	0.27492	0.247756	0.720029	0.482095	0.420845	0.16449	0.810285	0.457724	0.488453	0.307859
Cau	NA	NA	NA	NA	NA	NA	NA	NA	NA	NA	NA	NA	NA	NA	NA	NA	NA	NA	NA	NA	NA	NA	NA	NA	NA	NA	NA	NA	NA	NA	NA	NA	NA	NA	NA	NA	NA	NA	NA	NA	NA	NA	NA	NA	NA	NA	NA	NA
Clu	0.90681	0.959822	0.753251	0.213837	0.0677771	0.036135	0.00388662	0.00839185	0.00267978	0.00323301	0.00354591	0.00552712	0.505464	0.585205	0.285517	0.602694	0.361057	0.3579	0.0579494	0.0938546	0.00409348	0.00411445	0.00516803	0.00819377	0.852924	0.632601	0.787138	0.68544	0.0252054	0.018282	0.00124255	0.0229426	0.00025674	0.000322107	0.00190544	0.0245859	0.112102	0.0440752	0.026971	0.0301694	0.00487597	0.00411932	0.000404546	0.000114346	0.000103408	0.000128595	0.000464036	0.000791519
Ala	0.962406	0.941176	0.933333	0.933333	0.697485	0.275269	0.399015	1	0.92798	0.363784	0.914337	0.742625	0.952941	0.025641	0.909091	0.363636	0.275385	0.0232984	0.289934	0.68194	0.344333	0.106957	0.701299	0.0805347	0.621601	0.571429	0.666667	1	0.572761	0.630303	0.888889	NA	0.7	0.923077	0.307692	0.6	1	NA	1	1	0.222222	1	NA	NA	1	0.294505	0.769231	0.757576
Uar	NA	0.614114	0.125705	0.179536	NA	NA	0.157104	0.0198903	NA	NA	0.20463	0.156122	NA	0.614114	0.170515	0.212881	NA	NA	0.239706	0.01892	NA	NA	0.411681	0.269651	NA	0.581119	0.15629	0.148643	NA	NA	0.20963	0.0155155	NA	NA	0.0205031	0.0855894	NA	0.157052	0.101096	0.117907	NA	NA	0.20963	0.0237942	NA	NA	0.0464169	0.156122
Mlu	0.0402906	0.000897403	0.000116146	4.04587e-05	0.692899	0.0078614	0.000440387	0.0025121	8.77999e-06	6.48375e-06	7.96762e-05	0.000916557	0.373043	0.00547707	0.000227033	0.0011072	0.459474	0.0321969	0.00147512	0.00188014	1.07452e-06	4.53237e-05	0.0101818	0.123589	0.0574626	0.0631625	0.00300124	0.00636126	0.246588	0.141007	0.00181545	0.0266799	2.44872e-05	4.85633e-05	5.18372e-06	6.58481e-05	0.0109288	0.00011691	3.61588e-05	0.0158048	0.0523954	0.00873189	8.75308e-07	0.0337624	0.000521542	0.000212814	8.89167e-05	0.0371084
Mpu	NA	NA	NA	NA	NA	NA	NA	NA	NA	NA	NA	NA	NA	NA	NA	NA	NA	NA	NA	NA	NA	NA	NA	NA	NA	NA	NA	NA	NA	NA	NA	NA	NA	NA	NA	NA	NA	NA	NA	NA	NA	NA	NA	NA	NA	NA	NA	NA
Mma	NA	NA	NA	NA	NA	NA	NA	NA	NA	NA	NA	NA	NA	NA	NA	NA	NA	NA	NA	NA	NA	NA	NA	NA	NA	NA	NA	NA	NA	NA	NA	NA	NA	NA	NA	NA	NA	NA	NA	NA	NA	NA	NA	NA	NA	NA	NA	NA
Ggu	0.586555	0.21696	0.448482	0.802139	0.740261	0.81282	0.219048	0.603336	0.583397	0.5499	0.445478	0.421333	0.00874938	0.00331776	0.010189	0.162098	0.171979	0.0614978	0.0221083	0.139487	0.245824	0.0819583	0.762782	0.764031	0.777778	0.823529	0.176471	0.75	0.400775	0.712074	0.497549	0.497549	0.829298	0.393162	0.311304	0.15303	0.933333	0.666667	NA	1	1	0.47619	1	1	0.581201	0.363506	0.354325	0.75387
Llu	4.23705e-06	0.00399853	0.0126894	0.0621888	1.7066e-06	0.000537251	0.00336126	0.0299516	3.58042e-06	0.000622006	0.00518685	0.0365637	5.74967e-05	0.000952934	0.0215424	0.139527	1.73199e-05	0.00130181	0.00575726	0.045111	4.84089e-05	0.00236043	0.021591	0.0690865	9.49534e-06	0.000202221	0.00229583	0.0102897	1.78107e-05	0.000237989	0.000807058	0.00660748	5.82464e-06	0.000550023	0.000832688	0.0139315	9.31397e-05	0.00186105	0.0116361	0.0461989	1.90646e-05	0.00271691	0.0027298	0.0125811	1.48667e-05	0.00362162	0.00837432	0.0578985
Fsi	0.00322564	0.0325558	0.705891	0.502985	0.384979	0.693149	0.0951964	0.0428567	0.039955	0.180722	0.596222	0.724007	0.0324415	0.464244	0.819799	0.797027	0.535779	0.738103	0.101712	0.0850953	0.00695122	0.0570403	0.100913	0.940286	0.730117	0.0381598	0.0103062	0.158083	0.384564	0.382763	0.636966	0.391597	0.0199857	0.107211	0.272917	0.445453	0.752997	0.18452	0.145136	0.193065	0.119249	0.141919	0.116787	0.268194	0.833037	0.64497	0.539358	0.977347
Lly	NA	NA	NA	NA	NA	NA	NA	NA	NA	NA	NA	NA	NA	NA	NA	NA	NA	NA	NA	NA	NA	NA	NA	NA	NA	NA	NA	NA	NA	NA	NA	NA	NA	NA	NA	NA	NA	NA	NA	NA	NA	NA	NA	NA	NA	NA	NA	NA
Lpa	0.209582	0.525427	0.0288722	0.0448296	0.0377299	0.027963	0.63453	1	0.135287	0.269988	0.444755	0.370475	0.376721	0.776281	0.00970545	0.654412	0.436622	0.437152	0.146429	0.333333	0.556062	0.126537	0.280754	0.515789	0.0273739	NA	NA	NA	0.0985798	0.0945378	0.682828	0.380952	0.430577	0.380952	1	1	NA	NA	NA	NA	0.0841026	0.312308	0.238095	0.0639835	0.541353	NA	0.372628	0.857143
Hic	0.193609	0.624641	0.0598905	0.634457	0.191708	0.368832	0.18433	0.741629	0.648234	0.752959	0.389318	0.142366	0.441587	0.959706	0.4096	0.769034	0.198767	0.77049	0.243175	0.121481	0.957977	0.858672	0.265555	0.100557	0.442416	0.791676	0.974863	0.0459947	0.160376	0.467838	0.00731332	0.005197	0.864886	0.0378818	0.082864	0.00547005	0.0155008	0.000794561	0.0734453	0.0448823	0.0101186	0.0669104	0.0108623	0.0147689	0.231356	0.0415233	0.0367989	0.0224579
Gge	0.0278761	0.0111497	0.0231879	0.00260787	0.0811419	0.015545	0.00248673	0.00493364	0.266381	0.0486795	0.0166805	0.00143128	0.0242186	0.00104119	0.00715918	0.0152061	0.133236	0.00488854	0.00309613	0.00146654	0.118794	0.00330291	0.00482071	0.0134493	0.147028	0.0795065	0.0366859	0.0612642	0.349377	0.133052	0.0167425	0.00290275	0.298935	0.0130143	0.0245026	0.00318745	0.145826	0.676501	0.943043	0.465419	0.20311	0.370264	0.0835212	0.105136	0.736082	0.529484	0.0195686	0.0303243
Rru	0.563333	0.0224541	0.0508021	0.984062	0.327071	0.43537	0.260243	0.914886	0.177859	0.296788	0.550985	0.988894	0.181415	0.0333553	0.297142	0.765192	0.377716	0.81465	0.741203	0.75461	0.441708	0.233758	0.542795	0.925222	0.622497	0.552022	0.936855	0.587661	0.590127	0.831396	0.86784	0.696584	0.94032	0.628999	0.756576	0.225876	0.79612	0.682062	0.581549	0.657633	0.880926	0.79745	0.926532	0.445199	0.899427	0.325618	0.215165	0.245649
Cib	0.727312	0.839383	0.172395	0.200856	0.962233	0.834168	0.66962	0.520785	0.940656	0.85907	0.706358	0.913569	0.580392	0.430785	0.528543	0.158399	0.711082	0.534978	0.743118	0.25062	0.852189	0.908134	0.427535	0.327482	0.0472932	0.240133	0.691367	0.561645	0.0350881	0.210222	0.853	0.589939	0.0578094	0.358774	0.219334	0.722978	0.276558	0.344546	0.831574	0.767179	0.251408	0.445289	0.659281	0.46021	0.523607	0.495514	0.762184	0.956753
Cpy	0.869964	NA	0.0540778	0.527046	0.470411	0.541105	0.21535	0.226477	0.60329	0.288373	0.308344	0.866757	0.497129	0.161496	0.959979	0.469133	0.382487	0.686485	0.976913	0.747353	0.408048	0.677517	1	1	0.97561	0.726268	0.727724	0.568371	0.968075	0.753217	0.470419	0.488389	0.127572	0.985689	0.615215	0.296064	0.305945	0.875619	0.194126	0.0556783	0.101113	0.0160219	0.0154641	0.255163	0.0133062	0.0932748	0.00326667	0.00342749
Oam	0.440096	0.018854	0.0556073	0.112635	0.0469577	0.210871	0.011745	0.655971	0.0346625	0.215867	0.112391	0.969262	0.128667	0.382731	0.556732	0.132478	0.76651	0.0375808	0.687256	0.153532	0.548996	0.97306	0.875034	0.419801	0.472613	0.617794	0.714444	0.245734	0.665006	0.145915	0.458722	0.215015	0.836454	0.934596	0.444797	0.503308	0.493237	0.292475	0.0761208	0.030772	0.241367	0.772937	0.38615	0.825233	0.584094	0.731396	0.631517	0.289637

## Sheet: 5.CROPS
	Baseline												2020												2050												2080
	RCP 8.5				RCP 6.0				RCP 4.5				RCP 8.5				RCP 6.0				RCP 4.5				RCP 8.5				RCP 6.0				RCP 4.5				RCP 8.5				RCP 6.0				RCP 4.5
###	D1	D2	D3	D4	D1	D2	D3	D4	D1	D2	D3	D4	D1	D2	D3	D4	D1	D2	D3	D4	D1	D2	D3	D4	D1	D2	D3	D4	D1	D2	D3	D4	D1	D2	D3	D4	D1	D2	D3	D4	D1	D2	D3	D4	D1	D2	D3	D4
Aal	-0.751388	-0.751388	-0.751388	-0.735878	-0.580959	-0.580959	-0.756112	-0.740552	-0.388912	-0.480737	-0.53243	-0.682558	-0.83236	-0.822405	-0.822405	-0.822405	-0.696103	-0.68176	-0.822064	-0.807661	-0.512717	-0.529312	-0.53581	-0.58835	-0.819339	-0.797062	-0.857086	-0.840445	-0.670092	-0.63813	-0.642302	-0.606639	-0.520512	-0.546237	-0.648202	-0.6159	-0.740928	-0.745338	-0.854967	-0.924937	-0.521377	-0.619727	-0.64788	-0.765277	-0.50157	-0.48973	-0.487352	-0.482806
Gpy	-0.246243	-0.259807	-0.218513	-0.228998	-0.300854	-0.291722	-0.311839	-0.431508	-0.372784	-0.314295	-0.332627	-0.371585	-0.265567	-0.21893	-0.234933	-0.256656	-0.294544	-0.265423	-0.316159	-0.404677	-0.377212	-0.344689	-0.413041	-0.452232	-0.416603	-0.309669	-0.33754	-0.40185	-0.41913	-0.417533	-0.415057	-0.563535	-0.452173	-0.399495	-0.420254	-0.44683	-0.331603	-0.350753	-0.2929	-0.341649	-0.308274	-0.324033	-0.286174	-0.420577	-0.476875	-0.379862	-0.360739	-0.379043
Lti	NA	NA	NA	NA	NA	NA	NA	NA	NA	NA	NA	NA	NA	NA	NA	NA	NA	NA	NA	NA	NA	NA	NA	NA	NA	NA	NA	NA	NA	NA	NA	NA	NA	NA	NA	NA	NA	NA	NA	NA	NA	NA	NA	NA	NA	NA	NA	NA
Sci	NA	NA	NA	NA	NA	NA	NA	NA	NA	NA	NA	NA	NA	NA	NA	NA	NA	NA	NA	NA	NA	NA	NA	NA	NA	NA	NA	NA	NA	NA	NA	NA	NA	NA	NA	NA	NA	NA	NA	NA	NA	NA	NA	NA	NA	NA	NA	NA
Pvo	0.00151656	0.015064	0.00273945	-0.000255766	-0.210411	-0.178931	-0.137733	-0.12534	NA	NA	NA	NA	-0.0931081	-0.0720986	-0.0561805	-0.0678664	-0.246832	-0.207276	-0.225809	-0.225809	NA	NA	NA	NA	-0.180929	-0.154985	-0.144675	-0.157541	-0.181345	-0.196753	-0.196296	-0.196296	NA	NA	NA	NA	-0.0964527	-0.0964527	-0.0964527	-0.0973896	-0.195337	-0.184972	-0.172184	-0.173685	NA	NA	NA	NA
Cfi	NA	-0.0471753	0.104652	0.0752649	NA	NA	-0.587245	-0.570579	NA	NA	-1.20587	-0.893449	NA	0.169652	0.273211	0.0812874	NA	NA	-0.646834	-0.540609	NA	NA	-1.12903	-0.864894	NA	0.169652	0.0959331	0.00298486	NA	NA	-0.676986	-0.641768	NA	NA	-1.12903	-0.895682	NA	0.60405	-0.0334335	0.0789429	NA	NA	-0.520152	-0.571523	NA	NA	-1.05248	-0.87474
Ccr	NA	NA	NA	NA	NA	NA	NA	NA	NA	NA	NA	NA	NA	NA	NA	NA	NA	NA	NA	NA	NA	NA	NA	NA	NA	NA	NA	NA	NA	NA	NA	NA	NA	NA	NA	NA	NA	NA	NA	NA	NA	NA	NA	NA	NA	NA	NA	NA
Mca	-0.537905	-0.558539	-0.373535	-0.297727	-0.574942	-0.472992	-0.38808	-0.235152	-0.511468	-0.403692	-0.419944	-0.313641	-0.53938	-0.528852	-0.321212	-0.205129	-0.572422	-0.446882	-0.351731	-0.149471	-0.492683	-0.383281	-0.376562	-0.301851	-0.553293	-0.485641	-0.320952	-0.254563	-0.51249	-0.467766	-0.41937	-0.339629	-0.485909	-0.344462	-0.324742	-0.250006	-0.433269	-0.454148	-0.337714	-0.323284	-0.513163	-0.41633	-0.342684	-0.289426	-0.44631	-0.340333	-0.37881	-0.300031
Mav	NA	NA	NA	NA	NA	NA	NA	NA	NA	NA	NA	NA	NA	NA	NA	NA	NA	NA	NA	NA	NA	NA	NA	NA	NA	NA	NA	NA	NA	NA	NA	NA	NA	NA	NA	NA	NA	NA	NA	NA	NA	NA	NA	NA	NA	NA	NA	NA
Dni	0.31002	0.325703	0.257922	0.130316	0.366631	0.325671	0.312995	0.150157	0.315212	0.287265	0.23664	0.111109	0.395618	0.377615	0.34016	0.225429	0.403798	0.422612	0.396632	0.268002	0.376258	0.359609	0.276928	0.145812	0.387501	0.403176	0.306116	0.179994	0.427392	0.431919	0.409576	0.260519	0.378276	0.353566	0.291262	0.130509	0.410099	0.423023	0.360961	0.238867	0.426917	0.425154	0.418739	0.257666	0.346137	0.345742	0.261891	0.124425
Sbe	NA	NA	NA	NA	NA	NA	NA	NA	NA	NA	NA	NA	NA	NA	NA	NA	NA	NA	NA	NA	NA	NA	NA	NA	NA	NA	NA	NA	NA	NA	NA	NA	NA	NA	NA	NA	NA	NA	NA	NA	NA	NA	NA	NA	NA	NA	NA	NA
Hcr	-0.17754	-0.160273	-0.0749266	-0.0511416	-0.163616	-0.0784128	-0.0834678	-0.0502663	-0.112826	0.0117294	-0.0521906	-0.0720715	-0.127317	-0.0418994	0.000456224	0.069859	-0.127843	-0.0588301	-0.00619869	0.0455273	-0.0612796	-0.00692545	0.0497115	0.0441581	0.0549781	0.0624454	0.146956	0.270238	0.0898987	0.0919216	0.198047	0.321383	0.0790234	0.135612	0.246471	0.355009	0.154368	0.247625	0.282367	0.359548	0.134795	0.294621	0.273884	0.376782	0.121372	0.151399	0.24726	0.323868
Cau	NA	NA	NA	NA	NA	NA	NA	NA	NA	NA	NA	NA	NA	NA	NA	NA	NA	NA	NA	NA	NA	NA	NA	NA	NA	NA	NA	NA	NA	NA	NA	NA	NA	NA	NA	NA	NA	NA	NA	NA	NA	NA	NA	NA	NA	NA	NA	NA
Clu	-0.110224	-0.506164	-0.362591	-0.491935	-0.0200623	0.0358145	0.165093	0.304082	0.17122	0.261236	0.270736	0.309934	0.0646272	0.000333474	0.223277	-0.122679	0.0155265	0.161587	0.328842	0.438203	0.165793	0.238116	0.315906	0.322636	-0.0217694	-0.494461	-0.288747	0.169234	0.00648687	0.0483111	0.0832564	0.462465	0.156938	0.251622	0.294375	0.290435	-0.0606242	-0.22992	-0.20936	-0.0802359	0.129046	0.2835	0.19873	0.363409	0.153697	0.246262	0.422527	0.417968
Ala	0.0159729	-0.0792329	-0.0512471	-0.0512471	-0.37179	NA	NA	-0.252596	-0.62906	-1.01663	-0.831391	-0.634921	NA	NA	NA	NA	NA	0.431259	0.443004	-0.143436	-0.136576	0.349672	NA	0.3841	-0.28309	NA	NA	NA	0.262197	0.175101	NA	NA	NA	NA	NA	0.143902	NA	NA	NA	NA	NA	NA	NA	NA	-0.0474158	0.338718	NA	NA
Uar	NA	-0.216547	-0.0455684	-0.129276	NA	NA	-0.151436	-0.12955	NA	NA	0.338971	0.0722204	NA	-0.157779	-0.0657904	-0.0795341	NA	NA	-0.194035	-0.167433	NA	NA	-0.00992299	0.0238094	NA	-0.123553	0.082214	-0.0855016	NA	NA	-0.114948	-0.0514132	NA	NA	0.346543	0.0906945	NA	0.0830455	0.0333755	0.0140321	NA	NA	-0.114948	-0.172132	NA	NA	0.35673	0.0722204
Mlu	-0.164127	-0.257296	-0.229143	-0.367496	0.394221	0.16107	-0.175299	0.0317397	-0.177225	-0.357239	-0.242126	-0.226222	-0.0310217	-0.300802	-0.315069	-0.172107	0.184165	0.0252075	-0.0166957	0.184299	0.0510738	-0.0210146	0.0196248	0.0384089	-0.0250646	-0.14972	-0.141031	-0.0675549	-0.0582727	-0.258532	-0.133357	0.216149	-0.00753618	-0.0515758	-0.155316	-0.188647	-0.237865	-0.260809	-0.20668	0.0843524	0.0717029	0.0111228	-0.0337659	0.0755636	0.0417612	-0.139399	-0.257599	-0.0608191
Mpu	NA	NA	NA	NA	NA	NA	NA	NA	NA	NA	NA	NA	NA	NA	NA	NA	NA	NA	NA	NA	NA	NA	NA	NA	NA	NA	NA	NA	NA	NA	NA	NA	NA	NA	NA	NA	NA	NA	NA	NA	NA	NA	NA	NA	NA	NA	NA	NA
Mma	NA	NA	NA	NA	NA	NA	NA	NA	NA	NA	NA	NA	NA	NA	NA	NA	NA	NA	NA	NA	NA	NA	NA	NA	NA	NA	NA	NA	NA	NA	NA	NA	NA	NA	NA	NA	NA	NA	NA	NA	NA	NA	NA	NA	NA	NA	NA	NA
Ggu	-0.311105	-0.278319	-0.312817	-0.28656	0.00192414	-0.420121	-0.211248	-0.117971	-0.163798	-0.296975	-0.345231	-0.509073	-0.429169	-0.245556	-0.128747	0.0057482	-0.347308	-0.57487	-0.571062	-1.01177	-0.606759	-0.676478	-0.390548	-0.255418	NA	NA	NA	NA	-0.44635	-0.413881	-0.336716	-0.336716	0.114199	-0.146701	0.160371	0.317463	0.167875	NA	NA	NA	0.044637	0.331312	NA	NA	0.254201	-0.158041	-0.114763	-0.179125
Llu	-0.170484	-0.160353	-0.114552	-0.105707	-0.156439	-0.216857	-0.132033	-0.101702	-0.217681	-0.101097	-0.108129	-0.10032	-0.0353755	-0.0609806	-0.0326192	-0.0274574	-0.0388107	-0.0639629	-0.0264276	-0.0170682	-0.118379	-0.0497496	-0.0113364	0.00678788	-0.108834	-0.0990017	-0.0667949	-0.0590198	-0.0746021	-0.0993179	-0.0646943	-0.0387019	-0.157	-0.12218	-0.05463	-0.0183932	-0.135175	-0.141224	-0.0864142	-0.0809046	-0.114958	-0.164566	-0.0933271	-0.0613436	-0.193176	-0.127363	-0.0772616	-0.110872
Fsi	0.323754	0.137843	-0.151903	-0.308746	0.0511198	0.0775125	0.26334	0.23706	0.0175601	0.144333	0.126908	0.261399	0.429954	0.275673	-0.0930977	-0.486979	0.205015	-0.0656218	0.0575289	0.189339	0.102411	0.0958635	0.119192	0.210006	0.492001	0.413123	-0.0207133	-0.350224	0.322021	0.304781	0.5415	0.45059	0.172971	0.100692	0.17427	0.0527744	0.588661	0.592026	0.396802	-0.00110754	0.430778	0.373262	0.530345	0.749212	0.0861355	0.0364804	0.0924917	-0.0550323
Lly	NA	NA	NA	NA	NA	NA	NA	NA	NA	NA	NA	NA	NA	NA	NA	NA	NA	NA	NA	NA	NA	NA	NA	NA	NA	NA	NA	NA	NA	NA	NA	NA	NA	NA	NA	NA	NA	NA	NA	NA	NA	NA	NA	NA	NA	NA	NA	NA
Lpa	0.574562	1.56694	0.09405	-0.199258	-0.414243	-0.270134	-0.0452711	NA	0.0967272	NA	1.62734	0.0275725	0.204573	0.329198	-0.624273	-0.171511	0.104574	0.513002	0.238463	NA	0.435419	0.136885	-1.02739	0.0944085	0.327653	NA	NA	NA	-0.168764	0.0780617	0.0247422	1.08885	0.181252	-0.0635109	0.532616	0.436647	NA	NA	NA	NA	-1.02128	0.354952	-0.114412	-0.0271533	0.495503	NA	0.0571928	0.720173
Hic	-0.146327	-0.0334914	-0.380618	-0.366511	-0.0303972	-0.0605673	-0.458664	-0.209456	-0.0324515	-0.0898924	-0.29372	-0.727834	-0.224588	-0.393948	-0.559647	-0.346904	-0.274626	-0.0956874	-0.524058	-0.531238	-0.0553264	-0.136471	-0.611284	-0.794989	-0.345361	-0.57889	-0.640771	-0.258771	-0.39634	-0.586129	-0.351442	-0.423799	-0.331252	-0.389946	-0.354442	-0.147128	-0.509633	-0.688988	-0.887542	-0.450787	-0.568536	-0.516395	-0.618391	-0.696714	-0.357922	-0.391712	-0.413686	-0.241206
Gge	0.456789	0.44617	0.676833	0.345381	0.488396	0.416882	0.735444	0.367648	0.285874	0.199635	0.271289	0.238641	0.896292	0.762899	0.781632	0.246984	0.705626	0.60664	0.641678	0.567634	0.449368	0.410691	0.501475	0.20802	0.406133	0.623418	0.750955	0.176055	0.639082	0.561963	0.662749	0.619147	0.398906	0.385911	0.435404	0.411774	0.322639	0.290491	0.369063	0.305546	0.221888	0.185064	0.124567	0.409969	0.0931017	0.0150929	0.0204106	0.20954
Rru	-0.0191238	0.330119	0.327322	-0.626077	0.257445	-0.061368	-0.536026	-0.570147	0.118352	0.171581	-0.0583702	-0.514696	0.0282972	0.266201	-0.0410513	-0.59457	0.22199	-0.089037	-0.379257	-0.425704	0.139642	0.140324	0.0269058	-0.653178	0.0761556	0.0721969	-0.378453	-0.59492	0.130751	-0.188426	-0.421788	-0.384888	0.0113087	0.10175	-0.0627284	-0.310461	0.0727545	-0.144518	-0.468954	-0.210285	0.0431828	-0.253207	-0.301147	-0.276154	0.015486	0.198568	0.0691072	-0.244864
Cib	-0.171322	-0.100206	-0.382853	-0.152599	-0.520883	-0.2096	-0.216752	0.13583	-0.198698	-0.00722943	-0.194137	0.113548	-0.0557967	-0.332898	-0.453129	0.119209	-0.35024	-0.626884	-0.31657	-0.986022	0.0943876	-0.394255	-0.421558	-0.838167	-0.0578319	-0.314354	-0.779455	-0.467528	-0.0184166	-0.279186	-0.18272	-0.234505	-0.0350487	-0.340458	-0.229937	-0.0571669	-0.947596	-0.344833	-0.563289	-0.790416	-0.351741	-0.33108	-0.130811	-0.358734	-0.349208	-0.360843	-0.374001	-0.0698346
Cpy	-1.47477	NA	-0.430057	NA	-0.539719	-1.82058	NA	-0.248964	-0.264869	-0.371104	0.57918	-0.932799	-2.23378	-2.2439	-0.526337	NA	-0.310014	-1.76832	-0.685592	-2.0908	-0.381782	-0.56058	-0.643165	-0.798901	-0.969798	-0.613454	NA	-0.163675	-0.744062	-0.970442	-0.179246	-0.507504	-0.718749	-0.743321	-0.547647	-0.629255	-0.511356	-1.03143	-0.823071	-0.547289	0.0735303	-0.138294	0.223465	-0.795803	-0.0425366	0.00615481	0.123504	0.113501
Oam	0.11568	0.0250719	-0.190929	-0.156029	-0.0220507	-0.329472	-0.645937	-0.416081	-0.347821	-0.415346	-0.616163	-0.507842	0.238715	0.0815722	-0.095042	-0.0732479	0.124698	-0.29521	-0.117475	0.363775	0.222916	-0.02263	-0.0907463	-0.431549	0.287122	0.111495	-0.211846	0.0326033	0.121751	-0.241458	-0.182118	0.226682	0.127069	-0.104957	-0.386257	-0.538054	-0.119564	-0.124359	0.110261	0.407391	0.317281	-0.0602023	0.259785	-0.0694659	0.288204	-0.135142	-0.272804	0.0120411
P VALUES
###	V1	V2	V3	V4	V5	V6	V7	V8	V9	V10	V11	V12	V17	V18	V19	V20	V21	V22	V23	V24	V25	V26	V27	V28	V33	V34	V35	V36	V37	V38	V39	V40	V41	V42	V43	V44	V49	V50	V51	V52	V53	V54	V55	V56	V57	V58	V59	V60
Aal	0.000581023	0.000581023	0.000581023	0.00157885	0.00252391	0.00252391	0.00060121	0.00163744	0.026469	0.0267873	0.0140733	0.0249994	2.73017e-07	8.5351e-07	8.5351e-07	8.5351e-07	2.24481e-06	6.70538e-06	1.12438e-06	4.69908e-06	0.000124744	0.000264819	0.000947329	0.00125578	1.1708e-06	1.09688e-05	3.73462e-06	1.7258e-05	8.93157e-06	7.35542e-05	6.27482e-05	0.000268783	0.000176217	0.000180628	2.45558e-05	9.56379e-05	1.14768e-06	9.35693e-07	2.12311e-07	1.72601e-08	4.70301e-05	4.82786e-06	1.90984e-06	3.38467e-06	2.82912e-05	5.53203e-05	6.15672e-05	8.08786e-05
Gpy	0.00674751	0.00362735	0.0200601	0.0335923	0.00166457	0.00199572	0.00172463	8.82845e-05	0.000971487	0.0037035	0.00358712	0.00117129	0.00474817	0.0140733	0.0176304	0.0201744	0.00336175	0.00487647	0.00324471	0.000761535	0.000534801	0.00154416	0.000247177	0.000216413	4.43192e-05	0.000714259	0.00192136	0.000406226	1.6656e-05	2.63074e-05	8.23886e-05	1.73426e-06	4.44464e-05	0.000251623	0.000331104	0.000206938	0.00140012	0.000469799	0.00834272	0.00383915	0.00128333	0.000811375	0.00466492	0.000220511	2.60948e-05	0.000224902	0.00132463	0.00093675
Lti	NA	NA	NA	NA	NA	NA	NA	NA	NA	NA	NA	NA	NA	NA	NA	NA	NA	NA	NA	NA	NA	NA	NA	NA	NA	NA	NA	NA	NA	NA	NA	NA	NA	NA	NA	NA	NA	NA	NA	NA	NA	NA	NA	NA	NA	NA	NA	NA
Sci	NA	NA	NA	NA	NA	NA	NA	NA	NA	NA	NA	NA	NA	NA	NA	NA	NA	NA	NA	NA	NA	NA	NA	NA	NA	NA	NA	NA	NA	NA	NA	NA	NA	NA	NA	NA	NA	NA	NA	NA	NA	NA	NA	NA	NA	NA	NA	NA
Pvo	0.745234	0.6605	0.755457	0.819041	0.0659475	0.116834	0.228351	0.297944	NA	NA	NA	NA	0.635563	0.759507	0.860351	0.755457	0.0818232	0.184111	0.130007	0.130007	NA	NA	NA	NA	0.485806	0.591274	0.654081	0.559432	0.23579	0.178418	0.172904	0.172904	NA	NA	NA	NA	0.967796	0.967796	0.967796	0.984777	0.251834	0.322391	0.403201	0.371716	NA	NA	NA	NA
Cfi	NA	0.847205	0.47366	0.473565	NA	0.11142	0.000272543	0.000105752	NA	NA	0.000137412	1.39024e-07	NA	0.548256	0.109862	0.419446	NA	0.11142	8.9536e-06	3.59162e-05	NA	NA	7.69535e-06	3.21533e-07	NA	0.548256	0.504305	0.905573	NA	0.11142	7.12379e-06	1.75446e-06	NA	NA	7.69535e-06	1.10744e-07	NA	0.236225	0.946406	0.537548	NA	0.668003	0.00088537	9.25636e-05	NA	NA	0.000179806	1.08526e-06
Ccr	NA	NA	NA	NA	NA	NA	NA	NA	NA	NA	NA	NA	NA	NA	NA	NA	NA	NA	NA	NA	NA	NA	NA	NA	NA	NA	NA	NA	NA	NA	NA	NA	NA	NA	NA	NA	NA	NA	NA	NA	NA	NA	NA	NA	NA	NA	NA	NA
Mca	4.2924e-06	8.15828e-06	0.00356208	0.0263779	1.12615e-06	0.000116487	0.000792698	0.0353764	3.73312e-05	0.00112301	0.000789403	0.00508703	2.7032e-06	8.04706e-06	0.00652186	0.0434368	4.68731e-07	6.28094e-05	0.00111581	0.0604262	2.14303e-05	0.000648188	0.000464694	0.00886626	3.14623e-07	2.19962e-05	0.00214945	0.0113107	1.5797e-06	3.61647e-05	0.000215649	0.00212247	1.04606e-05	0.00134055	0.00218695	0.00913281	3.35515e-05	2.6368e-05	0.00159354	0.00193829	1.25506e-06	8.9013e-05	0.000749371	0.00474683	2.99858e-05	0.000748082	0.000568895	0.00236148
Mav	NA	NA	NA	NA	NA	NA	NA	NA	NA	NA	NA	NA	NA	NA	NA	NA	NA	NA	NA	NA	NA	NA	NA	NA	NA	NA	NA	NA	NA	NA	NA	NA	NA	NA	NA	NA	NA	NA	NA	NA	NA	NA	NA	NA	NA	NA	NA	NA
Dni	0.0602502	0.0363497	0.11585	0.585029	0.0194651	0.0424444	0.0462542	0.480515	0.0278613	0.0355779	0.0942168	0.581363	0.0129868	0.0115807	0.0231853	0.161913	0.0167912	0.00352776	0.00736572	0.135594	0.00883667	0.00949469	0.058708	0.447651	0.0188925	0.00948711	0.0881728	0.434124	0.0079705	0.00523117	0.00876363	0.189793	0.00809425	0.0106166	0.0358535	0.500062	0.00990568	0.00470164	0.0169914	0.14716	0.00781695	0.00356099	0.00347859	0.146549	0.010808	0.00939654	0.0542901	0.413546
Sbe	NA	NA	NA	NA	NA	NA	NA	NA	NA	NA	NA	NA	NA	NA	NA	NA	NA	NA	NA	NA	NA	NA	NA	NA	NA	NA	NA	NA	NA	NA	NA	NA	NA	NA	NA	NA	NA	NA	NA	NA	NA	NA	NA	NA	NA	NA	NA	NA
Hcr	0.177259	0.449007	0.981315	0.765053	0.260416	0.906756	0.951836	0.875606	0.642637	0.531959	0.858614	0.891329	0.61169	0.530962	0.38002	0.161564	0.655985	0.754119	0.466795	0.296339	0.724842	0.349007	0.183333	0.231499	0.345179	0.196188	0.0506898	0.0026522	0.186776	0.118576	0.0180398	0.00131165	0.150211	0.0778777	0.0141818	0.000643022	0.0759613	0.00472762	0.0021348	0.000180308	0.0961035	0.00185688	0.00251776	0.0001405	0.0914264	0.0426282	0.0096201	0.000526506
Cau	NA	NA	NA	NA	NA	NA	NA	NA	NA	NA	NA	NA	NA	NA	NA	NA	NA	NA	NA	NA	NA	NA	NA	NA	NA	NA	NA	NA	NA	NA	NA	NA	NA	NA	NA	NA	NA	NA	NA	NA	NA	NA	NA	NA	NA	NA	NA	NA
Clu	0.440313	0.0134875	0.206062	0.23016	0.871681	0.686524	0.265497	0.0666775	0.165238	0.0564819	0.0693784	0.095033	0.898239	0.731843	0.313765	0.755353	0.682933	0.289271	0.0405181	0.010405	0.112447	0.0516654	0.0274988	0.0701216	0.767645	0.0334718	0.471253	0.627034	0.756507	0.652209	0.457121	0.00962009	0.136902	0.0397857	0.0544739	0.0960908	0.753765	0.281889	0.420269	0.91448	0.270112	0.0477298	0.145577	0.0169379	0.128021	0.0373985	0.00279611	0.0113378
Ala	0.949771	0.711427	0.772145	0.772145	0.0935981	NA	NA	0.259044	0.015184	0.00333188	0.0116797	0.0587022	NA	NA	NA	NA	NA	0.333306	0.59567	0.950489	0.823424	0.800745	NA	0.694354	1	NA	NA	NA	0.935558	0.896717	NA	NA	NA	NA	NA	0.808239	NA	NA	NA	NA	NA	NA	NA	NA	1	1	NA	NA
Uar	NA	0.307259	0.622162	0.203153	NA	NA	0.346659	0.215457	NA	NA	0.383954	0.924404	NA	0.413849	0.541006	0.392066	NA	NA	0.245347	0.172218	NA	NA	0.742247	0.869861	NA	0.466939	0.814604	0.424905	NA	NA	0.527837	0.599987	NA	NA	0.423242	0.841855	NA	0.923601	0.960822	0.863506	NA	NA	0.527837	0.218208	NA	NA	0.454524	0.924404
Mlu	0.306529	0.0621836	0.0860395	0.0195269	0.0450071	0.646986	0.24639	0.992019	0.151924	0.0105447	0.0919603	0.14052	0.903062	0.0342652	0.0191609	0.216022	0.278825	1	0.874736	0.355974	0.698277	0.868656	0.862981	0.72771	0.894654	0.289291	0.151658	0.323097	0.811996	0.125309	0.327867	0.292059	0.858338	0.639053	0.272222	0.202726	0.140296	0.0478843	0.100362	0.737146	0.643042	0.926949	0.710485	0.801079	0.720936	0.261027	0.0709392	0.682249
Mpu	NA	NA	NA	NA	NA	NA	NA	NA	NA	NA	NA	NA	NA	NA	NA	NA	NA	NA	NA	NA	NA	NA	NA	NA	NA	NA	NA	NA	NA	NA	NA	NA	NA	NA	NA	NA	NA	NA	NA	NA	NA	NA	NA	NA	NA	NA	NA	NA
Mma	NA	NA	NA	NA	NA	NA	NA	NA	NA	NA	NA	NA	NA	NA	NA	NA	NA	NA	NA	NA	NA	NA	NA	NA	NA	NA	NA	NA	NA	NA	NA	NA	NA	NA	NA	NA	NA	NA	NA	NA	NA	NA	NA	NA	NA	NA	NA	NA
Ggu	0.677466	0.87804	0.419514	0.730522	0.61088	0.206084	0.902294	0.611099	0.684396	0.124848	0.0951312	0.0621802	0.138779	0.60701	0.97356	0.694081	0.181352	0.111106	0.174654	0.0323493	0.0758198	0.053707	0.554552	0.641024	0.273002	NA	NA	NA	0.0094517	0.237076	0.89281	0.89281	0.721196	0.241607	0.314828	0.484496	0.685879	0.167968	NA	NA	0.243663	0.923677	0.106279	0.106279	0.15542	0.428845	0.306416	0.221157
Llu	0.0333276	0.0258891	0.110853	0.129205	0.0218652	0.012091	0.0488434	0.105191	0.00788734	0.0722154	0.0677335	0.0896055	0.108225	0.104735	0.288196	0.301034	0.0770418	0.0718471	0.238566	0.309759	0.039134	0.0849079	0.357226	0.436878	0.0137221	0.0277792	0.145947	0.171919	0.0180087	0.0196614	0.0794144	0.201557	0.00507395	0.0103696	0.0905201	0.24424	0.0137363	0.0185442	0.190966	0.219479	0.00998531	0.00894406	0.0933171	0.234819	0.00492724	0.0276315	0.117316	0.100449
Fsi	0.0566851	0.74661	0.155687	0.0892941	0.750307	0.729567	0.336438	0.384949	0.809074	0.772266	0.736101	0.37388	0.0066567	0.187041	0.371995	0.020417	0.238036	0.505776	0.807422	0.348185	0.71631	0.862911	0.779128	0.428197	0.00187256	0.037828	0.689	0.0894868	0.0259853	0.0835559	0.0052169	0.0337081	0.281183	0.520063	0.258994	0.667794	0.000519095	0.0028669	0.103437	0.952845	0.00655335	0.0349951	0.00558903	0.00175566	0.709686	0.848958	0.470234	0.924592
Lly	NA	NA	NA	NA	NA	NA	NA	NA	NA	NA	NA	NA	NA	NA	NA	NA	NA	NA	NA	NA	NA	NA	NA	NA	NA	NA	NA	NA	NA	NA	NA	NA	NA	NA	NA	NA	NA	NA	NA	NA	NA	NA	NA	NA	NA	NA	NA	NA
Lpa	0.208509	0.0182425	0.761357	1	0.188532	0.253423	0.856068	0.166667	0.980488	NA	0.0387097	0.813355	0.613969	0.456465	0.0706311	0.911765	0.935022	0.211352	0.439286	0.666667	0.203211	0.869565	0.0857143	0.947368	0.591176	0.166667	0.2	0.2	0.410359	0.633053	0.808081	0.190476	0.643258	0.47619	0.266667	0.285714	0.235294	NA	NA	0.133333	0.0280342	0.540769	0.857143	0.819814	0.244846	0.615385	0.627329	0.132468
Hic	0.575793	0.93084	0.11811	0.172027	0.696709	0.850874	0.0478026	0.453129	0.755116	1	0.261773	0.00298893	0.254758	0.0804594	0.0321106	0.215166	0.221212	0.516399	0.00655645	0.0166125	0.69949	0.42326	0.00910758	0.00049316	0.079077	0.00366776	0.00201744	0.413425	0.0324114	0.00211896	0.0852541	0.107717	0.0390518	0.02045	0.0883531	0.658035	0.0284041	0.00867359	0.00256259	0.0381072	0.025589	0.0237055	0.00171658	0.00301067	0.0619658	0.0258162	0.0306641	0.134109
Gge	0.0740095	0.0903105	0.0647944	0.354445	0.0618641	0.127058	0.020453	0.105606	0.244067	0.63909	0.338496	0.342762	0.0183927	0.0241942	0.0115387	0.459983	0.0543812	0.121371	0.058841	0.0440638	0.0776894	0.278667	0.149708	0.648487	0.128331	0.0104226	0.0112825	0.628033	0.0730248	0.0978008	0.045958	0.01352	0.113658	0.356506	0.102861	0.19719	0.0974428	0.153683	0.0806033	0.175299	0.353283	0.493243	0.534023	0.140648	0.837672	0.747105	0.810441	0.5999
Rru	0.672406	0.135795	0.235311	0.0248828	0.219458	1	0.0441267	0.0235662	0.719499	0.605302	0.769944	0.0604645	0.995106	0.372047	0.986002	0.0630915	0.377716	0.892058	0.16234	0.122173	0.675785	0.765293	0.787009	0.016131	0.917496	0.884189	0.261055	0.0731729	0.705768	0.52239	0.124244	0.168828	0.690997	0.925543	0.905127	0.391043	0.787269	0.417317	0.15922	0.576003	0.909363	0.37059	0.29584	0.393212	0.571162	0.495287	0.576079	0.53933
Cib	0.575572	0.839383	0.137617	0.412736	0.0280264	0.384425	0.398565	0.710523	0.502203	0.962736	0.371752	0.875415	0.964776	0.311803	0.186715	0.66542	0.214276	0.0269713	0.240133	0.00282496	0.921432	0.135415	0.08274	0.00243948	0.846784	0.262236	0.00223882	0.109207	0.991636	0.282282	0.486394	0.407484	0.873144	0.154317	0.350024	0.925733	0.0183277	0.189783	0.0305649	0.0586895	0.19072	0.151206	0.461714	0.220402	0.100003	0.0939913	0.105391	0.84235
Cpy	0.0406549	NA	0.819575	NA	0.15889	0.0103856	NA	0.338072	0.106502	0.0785286	0.225537	0.160404	0.0014514	0.0226454	0.222073	0.87731	0.205271	0.000994841	0.119482	0.00757094	0.140295	0.0787546	0.19903	0.126591	0.0604659	0.271499	0.0953817	0.323459	0.00811438	0.00723141	0.496097	0.576542	0.0196969	0.0062102	0.0753731	0.0944627	0.0126231	0.00220943	0.0287563	0.0461436	0.678626	0.234447	1	0.00477818	0.864595	0.605301	0.759797	0.773253
Oam	0.813917	0.94818	0.32988	0.413287	0.973252	0.0446577	0.00136681	0.0933153	0.0300396	0.0122616	0.00234424	0.107289	0.332994	0.681567	0.83456	0.990034	0.520563	0.12603	0.989649	0.0372268	0.197403	0.826225	0.713517	0.247294	0.0752146	0.480528	0.322813	0.898257	0.60621	0.198398	0.582562	0.182528	0.591461	0.504832	0.103216	0.0992894	0.619478	0.740122	0.723434	0.15665	0.0974218	0.705888	0.37007	0.983993	0.109141	0.584593	0.317722	0.941245
