# Supplementary material for: Spatial Adaptive Responses of Highly Threatened European Mammal Species under Climate Change
Source: Preprints.org preprint supplement (doi:10.20944/preprints202111.0550.v1), 2021-11-29
Supplement: Supplementary file 3 [file supplementary]

Archive with 3 entries (3 files):
- Appendix III - excel tables.zip
- Appendix I - tables.pdf
- Appendix II - figures.pdf
