# Supplementary material for: Spatial Adaptive Responses of Highly Threatened European Mammal Species under Climate Change
Source: Preprints.org preprint supplement (doi:10.20944/preprints202111.0550.v1), 2021-11-29
Supplement: Supplementary file 3 [file Tab S8.xlsx]

## Sheet: PA
		Baseline												2020												2050												2080
		RCP 8.5				RACP 6.0				RCP 4.5				RCP 8.5				RACP 6.0				RCP 4.5				RCP 8.5				RACP 6.0				RCP 4.5				RCP 8.5				RACP 6.0				RCP 4.5
Aal	inters	1.97157	1.97464	1.98702	1.99673	2.0289	2.04341	2.03578	2.05357	2.00622	2.00097	2.00671	2.00704	1.93017	1.93605	1.93688	1.94286	2.00113	2.00896	1.99608	2.01098	1.92289	1.92404	1.9582	1.9729	1.92858	1.94041	1.94003	1.93947	1.97523	1.97558	1.99228	1.98	1.85641	1.87442	1.89078	1.9042	1.91798	1.94169	1.92774	1.93134	1.93968	1.96711	1.9704	1.96959	1.7692	1.82981	1.8416	1.83189
	incidence	1.0026	1.00193	0.999001	0.99639	1.00185	0.998528	1.00034	0.995864	0.997513	0.99888	0.997381	0.997291	1.00551	1.0044	1.00424	1.00304	1.00467	1.00316	1.00297	0.999756	1.00175	1.00148	0.999574	0.999218	1.00812	1.00612	1.00619	1.00629	1.00687	1.00681	1.00623	1.00606	1.009	1.00815	1.00754	1.00778	1.00776	1.00589	1.00608	1.00542	1.00625	1.00601	1.00543	1.00557	1.01138	1.0095	1.00955	1.00918
	loglik	-740.153	-753.685	-775.694	-799.801	-743.695	-774.183	-792.504	-817.033	-737.556	-773.843	-810.154	-834.512	-666.897	-663.518	-671.322	-682.934	-671.158	-689.772	-699.791	-714.252	-691.036	-723.006	-735.118	-740.629	-685.149	-706.746	-737.209	-771.093	-681.406	-716.948	-749.029	-786.965	-666.471	-705.273	-752.761	-791.957	-682.368	-714.5	-732.972	-749.165	-670.793	-711.045	-731.21	-771.442	-615.847	-650.876	-680.238	-728.147
Gpy	inters	1.30573	1.67561	2.00816	2.39061	1.42105	1.8157	2.17995	2.71089	1.21775	1.63625	2.10127	2.5947	1.29784	1.65442	1.98388	2.42073	1.38265	1.78122	2.12234	2.65822	1.20811	1.62146	2.0938	2.6967	1.25967	1.61076	1.98398	2.43546	1.34311	1.74014	2.11396	2.76987	1.19893	1.60128	2.1051	2.70834	1.24058	1.58152	1.94965	2.39433	1.30569	1.70449	2.04383	2.658	1.19652	1.57987	2.05914	2.64839
	incidence	1.00538	1.00254	1.00152	1.00301	1.00314	1.00158	0.999394	1.00131	1.00557	1.0033	1.00333	1.00419	1.0076	1.00493	1.00459	1.00555	1.0058	1.00406	1.00314	1.00479	1.00732	1.00537	1.00652	1.00669	1.00982	1.00705	1.00712	1.00649	1.00818	1.00591	1.00577	1.00527	1.00814	1.00682	1.00815	1.0087	1.0111	1.00816	1.00857	1.00793	1.01015	1.00731	1.00826	1.00772	1.00835	1.00756	1.00973	1.01034
	loglik	-388.808	-387.953	-409.78	-394.173	-392.681	-386.239	-404.316	-374.499	-396.491	-400.92	-410.471	-392.043	-393.734	-396.561	-420.452	-405.886	-394.845	-394.217	-416.509	-389.759	-402.957	-405.488	-421.742	-398.46	-402.454	-406.616	-435.819	-426.019	-401.741	-402.125	-433.345	-405.579	-409.303	-415.174	-435.37	-415.902	-409.699	-414.384	-450.261	-442.993	-414.739	-411.873	-453.748	-427.402	-416.094	-421.491	-443.717	-424.317
Lti	inters	6.02674e-12	6.02674e-12	6.02674e-12	6.02674e-12	4.15082e-11	4.15082e-11	4.15082e-11	4.15082e-11	5.68544e-10	5.68544e-10	5.68544e-10	5.68544e-10	6.02674e-12	6.02674e-12	6.02674e-12	6.02674e-12	4.15082e-11	4.15082e-11	4.15082e-11	4.15082e-11	5.68544e-10	5.68544e-10	5.68544e-10	5.68544e-10	6.02674e-12	6.02674e-12	6.02674e-12	6.02674e-12	4.15082e-11	4.15082e-11	4.15082e-11	4.15082e-11	5.68544e-10	5.68544e-10	5.68544e-10	5.68544e-10	6.02674e-12	6.02674e-12	6.02674e-12	6.02674e-12	4.15082e-11	4.15082e-11	4.15082e-11	4.15082e-11	5.68544e-10	5.68544e-10	5.68544e-10	5.68544e-10
	incidence	1	1	1	1	1	1	1	1	1	1	1	1	1	1	1	1	1	1	1	1	1	1	1	1	1	1	1	1	1	1	1	1	1	1	1	1	1	1	1	1	1	1	1	1	1	1	1	1
	loglik	0.00066759	0.00066759	0.00066759	0.00066759	-0.000265837	-0.000265837	-0.000265837	-0.000265837	-2.41347e-05	-2.41347e-05	-2.41347e-05	-2.41347e-05	0.00066759	0.00066759	0.00066759	0.00066759	-0.000265837	-0.000265837	-0.000265837	-0.000265837	-2.41347e-05	-2.41347e-05	-2.41347e-05	-2.41347e-05	0.00066759	0.00066759	0.00066759	0.00066759	-0.000265837	-0.000265837	-0.000265837	-0.000265837	-2.41347e-05	-2.41347e-05	-2.41347e-05	-2.41347e-05	0.00066759	0.00066759	0.00066759	0.00066759	-0.000265837	-0.000265837	-0.000265837	-0.000265837	-2.41347e-05	-2.41347e-05	-2.41347e-05	-2.41347e-05
Sci	inters	1.74668e-10	1.74668e-10	1.74668e-10	1.74668e-10	6.14723e-10	6.14723e-10	6.14723e-10	6.14723e-10	2.75508e-09	2.75508e-09	2.75508e-09	2.75508e-09	1.74668e-10	1.74668e-10	1.74668e-10	1.74668e-10	6.14723e-10	6.14723e-10	6.14723e-10	6.14723e-10	2.75508e-09	2.75508e-09	2.75508e-09	2.75508e-09	1.74668e-10	1.74668e-10	1.74668e-10	1.74668e-10	6.14723e-10	6.14723e-10	6.14723e-10	6.14723e-10	2.75508e-09	2.75508e-09	2.75508e-09	2.75508e-09	1.74668e-10	1.74668e-10	1.74668e-10	1.74668e-10	6.14723e-10	6.14723e-10	6.14723e-10	6.14723e-10	2.75508e-09	2.75508e-09	2.75508e-09	2.75508e-09
	incidence	1	1	1	1	1	1	1	1	1	1	1	1	1	1	1	1	1	1	1	1	1	1	1	1	1	1	1	1	1	1	1	1	1	1	1	1	1	1	1	1	1	1	1	1	1	1	1	1
	loglik	3.11659e-05	3.11659e-05	3.11659e-05	3.11659e-05	-2.18117e-06	-2.18117e-06	-2.18117e-06	-2.18117e-06	3.25999e-07	3.25999e-07	3.25999e-07	3.25999e-07	3.11659e-05	3.11659e-05	3.11659e-05	3.11659e-05	-2.18117e-06	-2.18117e-06	-2.18117e-06	-2.18117e-06	3.25999e-07	3.25999e-07	3.25999e-07	3.25999e-07	3.11659e-05	3.11659e-05	3.11659e-05	3.11659e-05	-2.18117e-06	-2.18117e-06	-2.18117e-06	-2.18117e-06	3.25999e-07	3.25999e-07	3.25999e-07	3.25999e-07	3.11659e-05	3.11659e-05	3.11659e-05	3.11659e-05	-2.18117e-06	-2.18117e-06	-2.18117e-06	-2.18117e-06	3.25999e-07	3.25999e-07	3.25999e-07	3.25999e-07
Pvo	inters	3.1079	3.10465	3.06699	3.09105	1.27423	1.289	1.3075	1.30525	2.74434e-09	2.74434e-09	2.74434e-09	2.74434e-09	3.07308	3.06209	3.0361	3.05824	1.29077	1.30495	1.31587	1.31603	2.74434e-09	2.74434e-09	2.74434e-09	2.74434e-09	3.00537	2.98621	2.95255	3.00004	1.31721	1.31658	1.32738	1.33453	2.74434e-09	2.74434e-09	2.74434e-09	2.74434e-09	3.07669	3.08081	3.07082	3.12781	1.33932	1.34314	1.35398	1.36153	2.74434e-09	2.74434e-09	2.74434e-09	2.74434e-09
	incidence	0.984633	0.97615	0.974755	0.976549	0.983415	0.982878	0.983356	0.993927	1	1	1	1	0.976782	0.96914	0.962184	0.964984	0.97567	0.975634	0.976625	0.991667	1	1	1	1	0.967944	0.962541	0.953386	0.945864	0.97087	0.971472	0.972627	0.984067	1	1	1	1	0.959989	0.952534	0.939318	0.9216	0.96998	0.96617	0.967368	0.973643	1	1	1	1
	loglik	-272.849	-271.662	-272.808	-268.59	-305.538	-307.681	-307.214	-311.064	4.29445e-06	4.29445e-06	4.29445e-06	4.29445e-06	-264.012	-262.843	-263.71	-260.608	-292.918	-295.075	-296.033	-300.989	4.29445e-06	4.29445e-06	4.29445e-06	4.29445e-06	-260.499	-260.841	-261.322	-258.191	-288.698	-289.843	-290.127	-294.258	4.29445e-06	4.29445e-06	4.29445e-06	4.29445e-06	-261.752	-259.74	-257.674	-253.949	-301.4	-302.3	-302.025	-303.753	4.29445e-06	4.29445e-06	4.29445e-06	4.29445e-06
Cfi	inters	6.61895e-12	0.064469	0.211288	0.477471	1.00158e-10	0.00429203	0.232855	0.451361	2.75508e-09	2.75508e-09	0.0925175	0.370951	6.61895e-12	0.0460532	0.190422	0.4626	1.00158e-10	0.00429203	0.238724	0.454335	2.75508e-09	2.75508e-09	0.0925162	0.357343	6.61895e-12	0.0357964	0.190966	0.445536	1.00158e-10	0.00429203	0.251368	0.464834	2.75508e-09	2.75508e-09	0.0926152	0.353782	6.61895e-12	0.0282201	0.184236	0.423136	1.00158e-10	0.00500233	0.284284	0.504946	2.75508e-09	2.75508e-09	0.0927665	0.34473
	incidence	1	0.179158	0.922384	0.988619	1	1.0284	0.995981	1.00251	1	1	1.03323	1.028	1	0.727016	1.00893	1.0156	1	1.0284	0.992777	1.00736	1	1	1.03532	1.0291	1	0.938843	1.04761	1.03647	1	1.0284	0.982695	1.00702	1	1	1.03701	1.02984	1	1.02541	1.08403	1.0486	1	0.9658	0.899038	0.975971	1	1	1.03844	1.03081
	loglik	0.0015921	-43.1162	-136.837	-239.283	-0.000152122	-6.94912	-155.235	-231.259	2.0357e-07	2.0357e-07	-94.3735	-227.975	0.0015921	-40.1702	-133.422	-238.136	-0.000152122	-6.94912	-153.274	-228.266	2.0357e-07	2.0357e-07	-91.6813	-221.487	0.0015921	-36.2743	-137.736	-237.047	-0.000152122	-6.94912	-159.499	-233.274	2.0357e-07	2.0357e-07	-92.8842	-219.888	0.0015921	-33.5559	-143.367	-236.25	-0.000152122	-7.02964	-170.436	-250.097	2.0357e-07	2.0357e-07	-96.7117	-218.359
Ccr	inters	2.75508e-09	2.75508e-09	2.75508e-09	2.75508e-09	2.75508e-09	2.75508e-09	2.75508e-09	2.75508e-09	5.29759e-12	5.29759e-12	5.29759e-12	5.29759e-12	2.75508e-09	2.75508e-09	2.75508e-09	2.75508e-09	2.75508e-09	2.75508e-09	2.75508e-09	2.75508e-09	5.29759e-12	5.29759e-12	5.29759e-12	5.29759e-12	2.75508e-09	2.75508e-09	2.75508e-09	2.75508e-09	2.75508e-09	2.75508e-09	2.75508e-09	2.75508e-09	5.29759e-12	5.29759e-12	5.29759e-12	5.29759e-12	2.75508e-09	2.75508e-09	2.75508e-09	2.75508e-09	2.75508e-09	2.75508e-09	2.75508e-09	2.75508e-09	5.29759e-12	5.29759e-12	5.29759e-12	5.29759e-12
	incidence	1	1	1	1	1	1	1	1	1	1	1	1	1	1	1	1	1	1	1	1	1	1	1	1	1	1	1	1	1	1	1	1	1	1	1	1	1	1	1	1	1	1	1	1	1	1	1	1
	loglik	2.31498e-06	2.31498e-06	2.31498e-06	2.31498e-06	1.8855e-06	1.8855e-06	1.8855e-06	1.8855e-06	0.00433155	0.00433155	0.00433155	0.00433155	2.31498e-06	2.31498e-06	2.31498e-06	2.31498e-06	1.8855e-06	1.8855e-06	1.8855e-06	1.8855e-06	0.00433155	0.00433155	0.00433155	0.00433155	2.31498e-06	2.31498e-06	2.31498e-06	2.31498e-06	1.8855e-06	1.8855e-06	1.8855e-06	1.8855e-06	0.00433155	0.00433155	0.00433155	0.00433155	2.31498e-06	2.31498e-06	2.31498e-06	2.31498e-06	1.8855e-06	1.8855e-06	1.8855e-06	1.8855e-06	0.00433155	0.00433155	0.00433155	0.00433155
Mca	inters	3.17431	3.98082	5.23534	6.51128	3.11494	4.20688	5.21827	6.51128	3.07152	3.89001	4.91503	5.77267	2.81085	3.50153	4.48673	5.47994	2.82368	3.74787	4.60691	5.60891	2.79137	3.46455	4.2881	5.10764	2.81577	3.45098	4.40822	5.36532	2.76703	3.65958	4.48062	5.42652	2.78586	3.39696	4.23852	4.96657	2.78627	3.43994	4.3739	5.25547	2.71039	3.58531	4.31932	5.25547	2.72538	3.32905	4.09944	4.78036
	incidence	0.994167	1.00214	0.999956	0.995639	1.00963	1.00071	0.992976	0.995639	1.01421	1.00684	1.00915	1.00371	0.995486	1.00405	1.00215	0.998202	1.01089	1.00225	0.994525	0.997606	1.01406	1.00632	1.00943	1.00328	0.993911	1.0025	1.00052	0.99672	1.00969	1.00097	0.99309	0.996428	1.01007	1.00226	1.00284	0.999666	0.989578	0.997035	0.998411	0.99502	1.00175	0.996021	0.991669	0.99502	1.00361	0.998239	0.999365	0.996412
	loglik	-491.705	-486.051	-464.672	-442.593	-497.116	-485.211	-462.877	-449.588	-488.682	-477.952	-471.37	-486.644	-505.975	-509.166	-503.667	-494.19	-507.031	-505.627	-490.507	-493.284	-499.947	-494.413	-497.595	-512.724	-473.681	-468.185	-451.003	-433.356	-479.189	-473.28	-449.269	-444.622	-472.591	-461.922	-456.001	-471.171	-451.432	-436.903	-403.461	-381.456	-458.776	-440.164	-411.221	-390.751	-451.406	-438.046	-424.86	-432.648
Mav	inters	2.14566e-09	2.14566e-09	2.14566e-09	2.14566e-09	6.92628e-09	6.92628e-09	6.92628e-09	6.92628e-09	1.13715e-10	1.13715e-10	1.13715e-10	1.13715e-10	2.14566e-09	2.14566e-09	2.14566e-09	2.14566e-09	6.92628e-09	6.92628e-09	6.92628e-09	6.92628e-09	1.13715e-10	1.13715e-10	1.13715e-10	1.13715e-10	2.14566e-09	2.14566e-09	2.14566e-09	2.14566e-09	6.92628e-09	6.92628e-09	6.92628e-09	6.92628e-09	1.13715e-10	1.13715e-10	1.13715e-10	1.13715e-10	2.14566e-09	2.14566e-09	2.14566e-09	2.14566e-09	6.92628e-09	6.92628e-09	6.92628e-09	6.92628e-09	1.13715e-10	1.13715e-10	1.13715e-10	1.13715e-10
	incidence	1	1	1	1	1	1	1	1	1	1	1	1	1	1	1	1	1	1	1	1	1	1	1	1	1	1	1	1	1	1	1	1	1	1	1	1	1	1	1	1	1	1	1	1	1	1	1	1
	loglik	-9.88506e-06	-9.88506e-06	-9.88506e-06	-9.88506e-06	1.6437e-06	1.6437e-06	1.6437e-06	1.6437e-06	-6.74202e-05	-6.74202e-05	-6.74202e-05	-6.74202e-05	-9.88506e-06	-9.88506e-06	-9.88506e-06	-9.88506e-06	1.6437e-06	1.6437e-06	1.6437e-06	1.6437e-06	-6.74202e-05	-6.74202e-05	-6.74202e-05	-6.74202e-05	-9.88506e-06	-9.88506e-06	-9.88506e-06	-9.88506e-06	1.6437e-06	1.6437e-06	1.6437e-06	1.6437e-06	-6.74202e-05	-6.74202e-05	-6.74202e-05	-6.74202e-05	-9.88506e-06	-9.88506e-06	-9.88506e-06	-9.88506e-06	1.6437e-06	1.6437e-06	1.6437e-06	1.6437e-06	-6.74202e-05	-6.74202e-05	-6.74202e-05	-6.74202e-05
Dni	inters	1.70792	2.28866	2.97267	3.99495	1.6747	1.96234	2.65342	3.70324	1.70314	2.19378	2.82031	3.76004	1.64789	2.22613	2.94809	4.05874	1.59297	1.91713	2.61612	3.79327	1.65733	2.11646	2.77566	3.81744	1.6079	2.18425	2.9081	4.03747	1.54274	1.88103	2.57268	3.74048	1.6288	2.09839	2.73458	3.74494	1.57409	2.15132	2.87876	3.91847	1.5173	1.85212	2.53925	3.66018	1.61981	2.10223	2.70934	3.72506
	incidence	0.958397	0.96647	0.976032	0.977186	0.955058	0.976943	0.977704	0.97479	0.982636	0.99305	0.990329	0.990543	0.970572	0.974785	0.980519	0.978464	0.972008	0.983817	0.983023	0.97915	0.987148	0.99696	0.993304	0.992067	0.976909	0.97942	0.983514	0.979665	0.97963	0.987099	0.986242	0.982166	0.989626	0.997787	0.994937	0.993218	0.981431	0.982639	0.985522	0.981735	0.982898	0.989472	0.988485	0.984413	0.990361	0.997613	0.995886	0.993812
	loglik	-292.958	-323.891	-341.921	-335.455	-286.729	-322.693	-341.302	-334.86	-313.97	-341.208	-355.98	-354.036	-298.282	-327.056	-344.48	-337.432	-296.076	-325.69	-345.293	-330.861	-319.921	-345.468	-359.041	-354.83	-302.771	-328.431	-344.947	-338.953	-299.078	-327.455	-346.163	-334.453	-318.87	-342.364	-356.271	-353.171	-302.413	-326.939	-341.009	-338.188	-298.989	-325.199	-341.358	-330.611	-314.424	-334.414	-350.272	-349.676
Sbe	inters	1.66453e-09	1.66453e-09	1.66453e-09	1.66453e-09	1.12539e-11	1.12539e-11	1.12539e-11	1.12539e-11	1.2105e-10	1.2105e-10	1.2105e-10	1.2105e-10	1.66453e-09	1.66453e-09	1.66453e-09	1.66453e-09	1.12539e-11	1.12539e-11	1.12539e-11	1.12539e-11	1.2105e-10	1.2105e-10	1.2105e-10	1.2105e-10	1.66453e-09	1.66453e-09	1.66453e-09	1.66453e-09	1.12539e-11	1.12539e-11	1.12539e-11	1.12539e-11	1.2105e-10	1.2105e-10	1.2105e-10	1.2105e-10	1.66453e-09	1.66453e-09	1.66453e-09	1.66453e-09	1.12539e-11	1.12539e-11	1.12539e-11	1.12539e-11	1.2105e-10	1.2105e-10	1.2105e-10	1.2105e-10
	incidence	1	1	1	1	1	1	1	1	1	1	1	1	1	1	1	1	1	1	1	1	1	1	1	1	1	1	1	1	1	1	1	1	1	1	1	1	1	1	1	1	1	1	1	1	1	1	1	1
	loglik	-5.17439e-06	-5.17439e-06	-5.17439e-06	-5.17439e-06	0.00107619	0.00107619	0.00107619	0.00107619	0.000163098	0.000163098	0.000163098	0.000163098	-5.17439e-06	-5.17439e-06	-5.17439e-06	-5.17439e-06	0.00107619	0.00107619	0.00107619	0.00107619	0.000163098	0.000163098	0.000163098	0.000163098	-5.17439e-06	-5.17439e-06	-5.17439e-06	-5.17439e-06	0.00107619	0.00107619	0.00107619	0.00107619	0.000163098	0.000163098	0.000163098	0.000163098	-5.17439e-06	-5.17439e-06	-5.17439e-06	-5.17439e-06	0.00107619	0.00107619	0.00107619	0.00107619	0.000163098	0.000163098	0.000163098	0.000163098
Hcr	inters	2.46191	2.97647	3.4106	4.15838	2.47427	2.92324	3.37619	4.14346	2.497	2.99621	3.49828	4.07438	2.45627	2.95004	3.3655	4.13285	2.46885	2.9085	3.36306	4.15002	2.48757	2.96893	3.43281	4.10465	2.41734	2.87263	3.3106	4.05477	2.42793	2.83333	3.24948	4.03149	2.46459	2.91291	3.38629	3.98376	2.38502	2.8421	3.20848	3.85215	2.39578	2.78126	3.17813	3.77485	2.40301	2.85857	3.36392	3.90632
	incidence	0.994859	0.998614	1.00024	1.00586	0.995093	0.997884	0.999312	1.00635	0.994716	0.997532	0.996577	1.00281	0.993995	0.997609	0.999821	1.00406	0.994206	0.99747	0.998633	1.0048	0.993126	0.995397	0.994627	0.999024	0.992001	0.99595	0.997386	1.00245	0.992334	0.995744	0.997907	1.0033	0.992129	0.994716	0.994173	1.00094	0.992145	0.995381	0.997488	1.00336	0.992444	0.995265	0.997807	1.00487	0.990821	0.993258	0.991825	0.999904
	loglik	-458.559	-469.44	-472.371	-456.951	-455.199	-470.258	-472.961	-460.157	-456.548	-466.607	-474.103	-476.007	-457.975	-466.055	-469.509	-464.626	-452.061	-465.722	-467.488	-462.474	-457.377	-467.547	-471.64	-479.226	-440.968	-450.295	-453.643	-436.501	-434.592	-450.796	-450.09	-436.24	-440.635	-453.801	-450.984	-454.949	-420.587	-427.03	-429.689	-413.058	-416.803	-430.588	-424.49	-416.52	-424.889	-432.095	-423.727	-427.293
Cau	inters	NA	NA	NA	NA	NA	NA	NA	NA	NA	NA	NA	NA	NA	NA	NA	NA	NA	NA	NA	NA	NA	NA	NA	NA	NA	NA	NA	NA	NA	NA	NA	NA	NA	NA	NA	NA	NA	NA	NA	NA	NA	NA	NA	NA	NA	NA	NA	NA
	incidence	NA	NA	NA	NA	NA	NA	NA	NA	NA	NA	NA	NA	NA	NA	NA	NA	NA	NA	NA	NA	NA	NA	NA	NA	NA	NA	NA	NA	NA	NA	NA	NA	NA	NA	NA	NA	NA	NA	NA	NA	NA	NA	NA	NA	NA	NA	NA	NA
	loglik	NA	NA	NA	NA	NA	NA	NA	NA	NA	NA	NA	NA	NA	NA	NA	NA	NA	NA	NA	NA	NA	NA	NA	NA	NA	NA	NA	NA	NA	NA	NA	NA	NA	NA	NA	NA	NA	NA	NA	NA	NA	NA	NA	NA	NA	NA	NA	NA
Clu	inters	4.97369	5.54577	6.32744	7.71583	4.03491	4.90744	5.08305	5.67931	2.90401	3.48867	4.68756	5.59474	4.56604	4.9925	5.65512	6.70894	3.71682	4.45738	4.74615	5.26126	2.76226	3.29693	4.36451	5.10981	4.3196	4.77634	5.41562	6.32535	3.68655	4.36877	4.59641	5.02652	2.72852	3.25895	4.24294	4.98638	4.2274	4.89012	6.00539	7.9293	3.55427	4.13176	4.37898	4.80685	2.669	3.19276	4.14199	4.87268
	incidence	1.01859	1.02092	1.01903	1.02075	1.02108	1.01992	1.02764	1.0267	1.02319	1.01843	1.01036	1.00948	1.0156	1.01726	1.02077	1.02409	1.02148	1.02247	1.02744	1.02702	1.02461	1.01993	1.01373	1.01345	1.00931	1.00953	1.01629	1.01726	1.01859	1.02005	1.02212	1.02273	1.02371	1.01907	1.01337	1.01518	0.9852	0.984432	0.986819	0.977383	1.01827	1.01693	1.01689	1.01397	1.023	1.01831	1.01193	1.01072
	loglik	-274.103	-257.667	-231.215	-187.698	-260.473	-242.964	-250.926	-235.145	-318.649	-300.42	-279.852	-271.2	-269.698	-254.224	-231.507	-201.646	-274.779	-268.523	-279.764	-263.895	-323.743	-305.93	-283.517	-273.117	-257.569	-249.531	-234.933	-212.782	-261.878	-247.101	-257.037	-245.17	-314.168	-298.929	-276.371	-272.514	-283.268	-285.031	-278.509	-256.019	-251.985	-240.167	-250.134	-237.845	-307.135	-291.991	-276.338	-269.651
Ala	inters	10.5245	12.0246	12.8641	12.6915	7.64896	8.26714	8.07433	8.65881	8.30332	8.87281	8.56559	9.24847	9.58472	11.7263	13.2161	14.7009	8.45594	7.89975	7.89363	8.5203	9.28794	9.32101	9.77705	9.9626	8.38381	16.5924	20.9247	20.6591	17.0699	21.3185	18.3317	15.6706	17.117	20.6215	18.2901	18.9686	14.0355	29.5	26.5	22	27.2879	24.5919	21	17.8333	15.6917	16.7614	19.9246	19.6098
	incidence	1.00914	1.01092	1.0104	1.01064	1.01008	1.01047	1.01501	1.01539	1.01027	1.01032	1.01218	1.01192	1.01217	1.01319	1.01181	1.0108	1.01044	1.01252	1.01682	1.0171	1.01061	1.01178	1.01283	1.01326	1.01523	1.01226	1.0101	1.01053	1.00425	1.00399	1.01377	1.0165	1.00517	1.00455	1.00685	1.00735	1.01425	1.01829	1.01972	1.02204	1.00373	1.00585	1.01977	1.02296	1.00407	1.00671	1.00545	1.00774
	loglik	-132.32	-91.5061	-86.1821	-87.1907	-169.096	-154.483	-134.847	-137.048	-221.636	-208.727	-205.379	-195.922	-205.035	-170.68	-177.363	-166.662	-204.334	-230.6	-213.009	-219.965	-257.442	-254.166	-250.159	-277.798	-254.608	-164.634	-165.714	-166.93	-207.569	-165.541	-106.935	-124.981	-219.617	-199.606	-222.829	-242.175	-255.212	-31.9472	-39.2071	-33.0831	-147.063	-168.635	-56.4009	-68.1954	-256.566	-230.468	-220.241	-229.882
Uar	inters	7.34207e-11	0.10703	0.320026	0.627092	2.74434e-09	2.74434e-09	0.134584	0.388784	1.68061e-10	1.68061e-10	0.0534671	0.211157	7.34207e-11	0.100331	0.351791	0.615216	2.74434e-09	2.74434e-09	0.14583	0.397168	1.68061e-10	1.68061e-10	0.0576575	0.229764	7.34207e-11	0.103987	0.355161	0.600302	2.74434e-09	2.74434e-09	0.142482	0.362991	1.68061e-10	1.68061e-10	0.0500667	0.220944	7.34207e-11	0.107957	0.37661	0.590157	2.74434e-09	2.74434e-09	0.154819	0.363697	1.68061e-10	1.68061e-10	0.0460444	0.206393
	incidence	1	0.708476	1.00977	1.00745	1	1	0.990228	1.01191	1	1	1.02779	1.04172	1	0.975969	1.00588	1.00972	1	1	0.967988	1.01073	1	1	0.980956	1.03945	1	0.985613	1.00176	1.01038	1	1	0.982967	1.01143	1	1	1.02398	1.04131	1	0.991192	0.999279	1.0102	1	1	0.9803	1.00859	1	1	1.03367	1.04374
	loglik	6.45433e-05	-66.9545	-182.977	-256.37	3.83497e-06	3.83497e-06	-90.6817	-200.346	-8.12961e-05	-8.12961e-05	-52.2293	-149.553	6.45433e-05	-73.1995	-196.116	-263.611	3.83497e-06	3.83497e-06	-95.3932	-209.651	-8.12961e-05	-8.12961e-05	-50.4741	-161.633	6.45433e-05	-77.2544	-194.729	-265.041	3.83497e-06	3.83497e-06	-98.0515	-198.404	-8.12961e-05	-8.12961e-05	-48.7169	-157.093	6.45433e-05	-82.7826	-202.232	-263.487	3.83497e-06	3.83497e-06	-105.266	-196.07	-8.12961e-05	-8.12961e-05	-47.3104	-147.975
Mlu	inters	5.85242	6.52762	6.63495	7.74402	7.56809	8.62596	9.30895	9.9736	4.21046	4.83696	5.28682	6.04734	4.84995	5.41675	5.86758	7.17635	6.57831	7.56948	8.18823	9.05258	3.63415	4.13999	4.55081	4.8887	4.84796	4.98733	5.45622	6.81205	6.59062	7.46445	8.17641	9.58833	3.31712	3.83133	4.48071	4.7715	4.40644	4.26136	4.33405	4.8771	5.6065	6.10003	6.83129	8.03214	3.07235	3.55107	4.0672	4.14708
	incidence	0.992459	0.998157	1.01006	1.00752	1.00529	1.0047	1.00239	1.00026	0.983749	1.00111	1.00736	1.00927	1.00724	1.00603	1.00754	1.01018	1.02066	1.0246	1.02022	1.0173	1.01129	1.01104	1.01159	1.01404	1.02168	1.02737	1.03009	1.02861	1.01658	1.0187	1.01711	1.01541	1.02794	1.02882	1.02599	1.03139	1.0335	1.04219	1.0469	1.04942	1.02606	1.02651	1.02425	1.02015	1.03946	1.04063	1.04057	1.04893
	loglik	-353.514	-403.176	-451.939	-450.649	-361.481	-392.102	-417.64	-414.843	-376.233	-371.977	-384.557	-386.58	-383.266	-431.069	-470.954	-471.404	-392.196	-410.832	-432.422	-418.294	-391.652	-401.393	-419.051	-452.112	-328.03	-372.937	-394.252	-376.605	-362.826	-378.418	-397.212	-382.096	-364.937	-365.866	-364.428	-378.55	-310.319	-364.178	-400.367	-423.501	-378.724	-426.438	-444.051	-481.56	-355.541	-354.965	-352.143	-359.514
Mpu	inters	3.64114e-12	3.64114e-12	3.64114e-12	3.64114e-12	2.46964e-09	2.46964e-09	2.46964e-09	2.46964e-09	1.36898e-10	1.36898e-10	1.36898e-10	1.36898e-10	3.64114e-12	3.64114e-12	3.64114e-12	3.64114e-12	2.46964e-09	2.46964e-09	2.46964e-09	2.46964e-09	1.36898e-10	1.36898e-10	1.36898e-10	1.36898e-10	3.64114e-12	3.64114e-12	3.64114e-12	3.64114e-12	2.46964e-09	2.46964e-09	2.46964e-09	2.46964e-09	1.36898e-10	1.36898e-10	1.36898e-10	1.36898e-10	3.64114e-12	3.64114e-12	3.64114e-12	3.64114e-12	2.46964e-09	2.46964e-09	2.46964e-09	2.46964e-09	1.36898e-10	1.36898e-10	1.36898e-10	1.36898e-10
	incidence	1	1	1	1	1	1	1	1	1	1	1	1	1	1	1	1	1	1	1	1	1	1	1	1	1	1	1	1	1	1	1	1	1	1	1	1	1	1	1	1	1	1	1	1	1	1	1	1
	loglik	0.00506854	0.00506854	0.00506854	0.00506854	-3.54957e-07	-3.54957e-07	-3.54957e-07	-3.54957e-07	0.000110168	0.000110168	0.000110168	0.000110168	0.00506854	0.00506854	0.00506854	0.00506854	-3.54957e-07	-3.54957e-07	-3.54957e-07	-3.54957e-07	0.000110168	0.000110168	0.000110168	0.000110168	0.00506854	0.00506854	0.00506854	0.00506854	-3.54957e-07	-3.54957e-07	-3.54957e-07	-3.54957e-07	0.000110168	0.000110168	0.000110168	0.000110168	0.00506854	0.00506854	0.00506854	0.00506854	-3.54957e-07	-3.54957e-07	-3.54957e-07	-3.54957e-07	0.000110168	0.000110168	0.000110168	0.000110168
Mma	inters	2.75475e-09	2.75475e-09	2.75475e-09	2.75475e-09	5.66174e-12	5.66174e-12	1.40937e-12	1.40937e-12	3.5376e-09	3.5376e-09	1.05167e-10	1.05167e-10	2.75475e-09	2.75475e-09	2.75475e-09	2.75475e-09	5.66174e-12	5.66174e-12	1.40937e-12	1.40937e-12	3.5376e-09	3.5376e-09	1.05167e-10	1.05167e-10	2.75475e-09	2.75475e-09	2.75475e-09	2.75475e-09	5.66174e-12	5.66174e-12	1.40937e-12	1.40937e-12	3.5376e-09	3.5376e-09	1.05167e-10	1.05167e-10	2.75475e-09	2.75475e-09	2.75475e-09	2.75475e-09	5.66174e-12	5.66174e-12	1.40937e-12	1.40937e-12	3.5376e-09	3.5376e-09	1.05167e-10	1.05167e-10
	incidence	1	1	1	1	1	1	0.999999	0.999999	1	1	1	1	1	1	1	1	1	1	0.999999	0.999999	1	1	1	1	1	1	1	1	1	1	0.999999	0.999999	1	1	1	1	1	1	1	1	1	1	0.999999	0.999999	1	1	1	1
	loglik	-5.0183e-07	-5.0183e-07	-5.0183e-07	-5.0183e-07	0.00254082	0.00254082	0.013452	0.013452	-4.24607e-06	-4.24607e-06	-0.000110403	-0.000110403	-5.0183e-07	-5.0183e-07	-5.0183e-07	-5.0183e-07	0.00254082	0.00254082	0.013452	0.013452	-4.24607e-06	-4.24607e-06	-0.000110403	-0.000110403	-5.0183e-07	-5.0183e-07	-5.0183e-07	-5.0183e-07	0.00254082	0.00254082	0.013452	0.013452	-4.24607e-06	-4.24607e-06	-0.000110403	-0.000110403	-5.0183e-07	-5.0183e-07	-5.0183e-07	-5.0183e-07	0.00254082	0.00254082	0.013452	0.013452	-4.24607e-06	-4.24607e-06	-0.000110403	-0.000110403
Ggu	inters	11.2162	11.1774	10.416	11.2924	9.73512	10.4084	11.6252	12.5602	7.21858	8.74728	8.35346	9.85743	13.2313	13.6656	12.7431	12.2689	12.7861	13.9698	14.3507	14.6357	9.24574	11.236	11.5014	11.7604	23.7219	23.399	22.4339	23.5912	18.6252	21.6021	22.7269	23.4481	11.5723	13.4005	14.9905	19.1121	36.0606	42.2113	50.8216	61.098	25.9926	34.236	41.3919	43.0955	11.7561	13.6562	16.8139	23.9071
	incidence	0.997437	0.997709	0.99955	0.998892	1	0.998853	0.99725	0.995611	1.00181	1.00122	1.00178	0.998451	0.996053	0.996379	0.997976	0.99908	0.998033	0.998298	0.997638	0.996521	1.0008	0.999412	1.00034	1.00041	0.993232	0.994523	0.995552	0.995467	0.995562	0.99462	0.993574	0.991246	1.00167	0.999542	0.997728	0.994531	0.98361	0.984135	0.983267	0.977822	0.991755	0.987913	0.98625	0.983792	1.00259	1.00077	0.997571	0.992539
	loglik	-172.296	-163.547	-160.981	-140.306	-198.457	-187.315	-167.737	-146.525	-251.734	-216.47	-225.719	-207.603	-215.239	-202.806	-212.424	-220.791	-223.663	-202.354	-198.892	-208.634	-266.754	-247.901	-238.839	-246.281	-188.055	-211.445	-257.672	-267.228	-223.939	-228.654	-263.584	-303.533	-239.06	-251.841	-255.361	-246.993	-242.037	-245.68	-257.13	-280.013	-213.667	-190.651	-173.986	-215.243	-248.748	-263.993	-259.949	-236.005
Llu	inters	1.07124	1.29584	1.54861	2.01895	0.942672	1.21945	1.45011	1.91274	0.960896	1.25005	1.46989	1.96395	1.06561	1.30614	1.56843	2.04318	0.931036	1.2214	1.46894	1.95093	0.949928	1.24189	1.48098	1.98952	1.06955	1.31048	1.55283	2.02276	0.935677	1.22413	1.45838	1.92075	0.955199	1.24621	1.47988	1.97565	1.08228	1.31277	1.5399	2.00685	0.934343	1.23825	1.47458	1.93589	0.955214	1.26187	1.47078	1.966
	incidence	0.975435	0.978452	0.973701	0.96651	0.959164	0.974294	0.974553	0.970806	0.962087	0.97408	0.974924	0.966066	0.977904	0.97803	0.974115	0.967213	0.966703	0.977123	0.974962	0.9711	0.968913	0.977369	0.974551	0.966194	0.976189	0.976449	0.975676	0.969058	0.963771	0.975993	0.975111	0.972123	0.965701	0.975647	0.974925	0.966374	0.970294	0.975597	0.974371	0.967875	0.964624	0.969829	0.969281	0.967583	0.965692	0.968998	0.974621	0.965463
	loglik	-394.645	-410.566	-417.502	-440.129	-378.791	-407.53	-416.569	-445.681	-381.677	-408.366	-418.653	-447.542	-395.109	-414.019	-420.931	-441.526	-378.667	-411.277	-418.535	-444.162	-381.77	-411.056	-417.658	-447.006	-392.601	-410.077	-417.346	-436.486	-375.227	-406.944	-416.979	-442.313	-378.84	-408.763	-416.608	-444.752	-392.192	-409.975	-413.228	-433.154	-374.441	-404.456	-413.84	-437.42	-379.037	-405.9	-414.134	-440.76
Fsi	inters	1.11892	2.04998	3.79286	6.16513	1.73383	2.3002	2.61536	3.68705	1.8705	2.64814	3.29419	3.6651	1.22618	1.9941	3.83106	5.90082	1.67915	2.06012	2.29937	3.37371	1.92671	2.56487	3.11646	3.54218	1.35273	2.23166	4.03255	6.81212	1.84556	2.44992	2.59989	3.6692	2.10754	2.67879	3.31049	3.7065	1.69388	2.76217	5.57393	10.6717	2.12796	2.93809	3.49503	5.07337	2.19091	2.85751	3.39737	4.06112
	incidence	1.02646	1.01819	1.0085	0.99861	1.01263	1.01129	1.01181	1.00792	1.01723	1.01266	1.0096	1.00859	1.01909	1.01439	1.00541	1.00181	1.01427	1.01522	1.01637	1.01233	1.01487	1.01147	1.00974	1.0086	1.01687	1.01399	1.00772	1.00187	1.01002	1.01042	1.01231	1.01003	1.00874	1.00611	1.00472	1.00452	1.01246	1.01143	1.0064	1.00176	1.00954	1.00949	1.00948	1.00928	1.00937	1.00783	1.0073	1.00729
	loglik	-212.601	-252.127	-249.042	-245.616	-227.694	-211.408	-208.67	-217.34	-186.715	-177.057	-183.689	-179.055	-220.162	-259.226	-263.295	-261.73	-215.56	-210.997	-214.129	-217.225	-180.056	-176.048	-185.289	-180.589	-243.504	-296.891	-313.469	-320.637	-236.609	-231.574	-247.022	-267.46	-196.658	-198.851	-212.399	-218.106	-316.577	-391.311	-402.642	-373.751	-265.935	-267.867	-282.807	-308.712	-210.467	-202.849	-221.526	-229.203
Lly	inters	3.5988e-12	3.5988e-12	3.5988e-12	3.5988e-12	2.06285e-11	2.06285e-11	2.06285e-11	2.06285e-11	5.71789e-11	5.71789e-11	5.71789e-11	5.71789e-11	3.5988e-12	3.5988e-12	3.5988e-12	3.5988e-12	2.06285e-11	2.06285e-11	2.06285e-11	2.06285e-11	5.71789e-11	5.71789e-11	5.71789e-11	5.71789e-11	3.5988e-12	3.5988e-12	3.5988e-12	3.5988e-12	2.06285e-11	2.06285e-11	2.06285e-11	2.06285e-11	5.71789e-11	5.71789e-11	5.71789e-11	5.71789e-11	3.5988e-12	3.5988e-12	3.5988e-12	3.5988e-12	2.06285e-11	2.06285e-11	2.06285e-11	2.06285e-11	5.71789e-11	5.71789e-11	5.71789e-11	5.71789e-11
	incidence	1	1	1	1	1	1	1	1	1	1	1	1	1	1	1	1	1	1	1	1	1	1	1	1	1	1	1	1	1	1	1	1	1	1	1	1	1	1	1	1	1	1	1	1	1	1	1	1
	loglik	0.00104208	0.00104208	0.00104208	0.00104208	0.000764138	0.000764138	0.000764138	0.000764138	-0.00031553	-0.00031553	-0.00031553	-0.00031553	0.00104208	0.00104208	0.00104208	0.00104208	0.000764138	0.000764138	0.000764138	0.000764138	-0.00031553	-0.00031553	-0.00031553	-0.00031553	0.00104208	0.00104208	0.00104208	0.00104208	0.000764138	0.000764138	0.000764138	0.000764138	-0.00031553	-0.00031553	-0.00031553	-0.00031553	0.00104208	0.00104208	0.00104208	0.00104208	0.000764138	0.000764138	0.000764138	0.000764138	-0.00031553	-0.00031553	-0.00031553	-0.00031553
Lpa	inters	16.1308	16.672	18.4404	19.8766	15.5409	17.1044	19.1252	21.5321	13.8395	15.521	16.4861	17.6287	19.9891	22.7194	23.7619	NA	19.9226	26.2632	NA	NA	16.6745	22.5909	24.95	26.2632	NA	NA	NA	NA	25.8916	29.3529	NA	NA	22.7202	35.5714	NA	NA	NA	NA	NA	NA	19.689	19.96	NA	NA	17.1738	19.9885	21.7295	23.2381
	incidence	0.967794	0.967116	0.631754	0.639232	0.982699	0.629995	0.575505	0.643016	0.980023	0.634485	0.715174	0.735865	0.633601	0.634475	9.37006e-86	NA	0.971151	0	NA	NA	0.96638	3.42446e-12	9.22653e-86	9.06194e-86	NA	NA	NA	NA	3.36531e-222	0	NA	NA	0.633332	7.65792e-18	NA	NA	NA	NA	NA	NA	6.169e-218	0	NA	NA	0.972968	0.635463	0.634412	0.000227795
	loglik	-352.63	-368.961	-346.364	-338.458	-389.801	-390.985	-350.169	-317.347	-351.777	-339.377	-342.125	-324.093	-477.371	-490.36	-515.664	NA	-577.494	-538.594	NA	NA	-559.277	-495.169	-503.222	-502.159	NA	NA	NA	NA	-743.749	-849.82	NA	NA	-735.169	-639.519	NA	NA	NA	NA	NA	NA	-366.029	-400.861	NA	NA	-454.348	-429.098	-419.314	-418.875
Hic	inters	6.98257	7.4099	8.14289	8.77319	6.32687	7.16687	7.61362	9.35635	6.54183	7.22366	7.47787	8.3433	7.31465	7.80932	8.67679	9.7924	7.13732	7.95527	8.20045	10.0231	7.1486	7.81645	8.30753	9.20989	7.45372	8.50998	9.33027	12.3957	7.42287	8.01711	9.43985	12.6332	6.99451	7.76745	9.41681	12.6019	7.3917	7.98207	9.1062	10.7887	7.12421	7.5983	8.58195	10.3455	6.73959	7.24787	8.51415	9.56479
	incidence	1.00344	1.05242	1.05734	1.06163	1.00531	1.00438	1.00399	1.00283	1.00214	1.00114	1.00498	1.00556	1.00206	1.04993	1.05338	1.05178	0.999991	0.998745	0.999683	0.999113	0.99919	0.999583	1.00121	1.00195	1.00029	1.04179	1.0474	1.04035	0.994269	1.03014	1.02641	1.02387	0.995228	1.03013	1.0291	1.0247	0.996896	1.03291	1.03532	1.03188	0.992172	1.02444	1.01852	1.0209	0.991837	1.01452	1.01227	1.00508
	loglik	-357.951	-331.616	-343	-345.356	-349.995	-356.332	-379.842	-377.443	-319.544	-324.853	-359.325	-387.318	-335.016	-303.94	-304.225	-300.512	-337.433	-347.834	-398.99	-375.463	-317.831	-339.375	-359.689	-365.222	-409.646	-413.68	-473.513	-456.397	-406.147	-454.112	-494.085	-455.922	-445.123	-476.209	-490.742	-471.4	-348.915	-372.011	-390.486	-401.016	-345.258	-380.134	-388.432	-377.477	-394.404	-447.917	-476.97	-561.914
Gge	inters	10.8596	11.6159	12.7061	14.8632	10.2144	10.9816	11.9551	13.5304	8.9758	10.0813	11.7498	12.7801	10.5908	11.2442	12.3364	14.367	9.97028	10.7334	11.6397	12.9925	8.63446	9.68516	11.1976	12.7955	9.13003	9.34185	10.5941	12.7692	8.79856	9.22042	10.1041	11.0443	8.02552	8.93657	9.98167	11.2707	8.86688	9.03945	10.1163	12.1314	8.32881	8.84924	9.48517	10.4994	7.36827	7.99582	8.99535	10.0348
	incidence	0.501835	0.289016	0.169676	0.0139961	0.479841	0.387593	0.247956	0.0340747	0.469647	0.400224	0.200462	0.177369	0.541114	0.374528	0.19769	0.0202216	0.525676	0.39868	0.272208	0.0804471	0.51038	0.4055	0.216063	0.168673	0.642137	0.586119	0.317042	0.0403591	0.689036	0.542638	0.37607	0.203369	0.592133	0.476312	0.294522	0.168613	0.78062	0.765539	0.34256	0.0347457	0.699491	0.578431	0.424539	0.208896	0.645621	0.548332	0.36961	0.243898
	loglik	-251.132	-266.814	-300.484	-326.708	-268.236	-275.705	-301.836	-334.767	-312.271	-293.958	-302.911	-324.425	-245.745	-268.699	-303.4	-326.44	-258.887	-264.94	-292.188	-327.808	-312.07	-296.766	-300.758	-298.328	-271.527	-314.385	-349.593	-362.805	-266.555	-287.341	-307.442	-353.954	-307.821	-292.278	-305.552	-310.757	-274.001	-326.483	-388.046	-416.45	-266.596	-285.54	-318.353	-368.414	-301.556	-294.023	-305.5	-314.375
Rru	inters	8.17588	10.7421	14.6631	18.5226	8.02491	12.5204	14.7085	16.3322	7.66782	9.30995	12.4158	15.443	8.47715	11.5411	15.7042	20.3655	8.57815	12.8031	14.7797	17.6688	7.81556	9.48976	12.6353	17.2101	8.97513	11.1814	14.7277	19.6569	8.28307	12.1848	14.7218	17.7435	7.93701	9.67633	13.3049	17.149	8.31625	10.6636	15.0575	18.5677	8.09606	11.872	14.7181	17.0817	7.66182	9.27672	12.0433	16.0248
	incidence	0.95677	0.934854	0.902031	0.797351	0.946276	0.897619	0.802405	0.763567	0.967532	0.955064	0.878822	0.74784	0.955071	0.930156	0.891369	0.730178	0.945189	0.902672	0.785839	0.726761	0.965573	0.954951	0.892352	0.712533	0.950671	0.939234	0.903834	0.462792	0.947567	0.907882	0.730005	0.638522	0.965797	0.954861	0.893155	0.722943	0.953212	0.945434	0.916328	0.579421	0.954014	0.914517	0.771797	0.600985	0.968413	0.958757	0.902847	0.659672
	loglik	-435.4	-426.373	-367.361	-359.729	-478.623	-397.344	-414.423	-444.467	-471.915	-474.941	-477.649	-473.393	-446.607	-422.688	-361.329	-351.668	-469.933	-411.289	-443.194	-440.945	-485.073	-491.523	-498.728	-469.298	-405.857	-403.705	-353.88	-346.073	-461.436	-409.323	-415.072	-410.107	-479.503	-484.445	-463.529	-447.04	-428.953	-416.01	-333.39	-350.31	-443.683	-379.741	-361.191	-371.815	-461.138	-460.098	-452.412	-418.927
Cib	inters	9.55557	11.0256	13.0101	16.1799	8.87864	9.85564	10.7126	13.4734	9.17843	10.2014	10.8789	12.0382	11.4654	13.3466	15.0249	16.8768	9.68794	10.3568	11.3005	13.4541	10.3163	11.3026	12.0949	13.6009	14.5261	15.3319	18.8383	23.4758	11.9181	12.8858	13.8905	16.9598	10.4915	12.2343	13.4411	16.17	16.5278	19.4829	22.7887	25.9345	12.9919	15.2779	16.0494	18.7664	9.88138	11.4053	12.4134	15.0338
	incidence	0.989357	0.989171	0.988482	0.980941	0.997545	0.996317	0.995538	0.997346	0.99282	0.99042	0.987775	0.993675	0.983393	0.982831	0.983392	0.983508	0.996667	0.995813	0.996595	1.00047	0.992601	0.990297	0.987705	0.993847	0.970339	0.965486	0.950283	0.92389	0.986209	0.984681	0.983223	0.983472	0.988701	0.984055	0.983534	0.986141	0.971369	0.95785	0.941692	0.937073	0.982985	0.979178	0.976971	0.979146	0.989462	0.986792	0.986997	0.991108
	loglik	-451.916	-457.041	-444.411	-439.86	-388.739	-424.871	-452.403	-431.107	-391.659	-434.363	-493.546	-512.832	-400.093	-397.856	-398.008	-414.196	-382.48	-416.318	-424.114	-406.734	-373.821	-408.087	-446.186	-460.766	-354.834	-408.611	-404.109	-403.741	-331.677	-359.227	-389.296	-354.069	-359.725	-365.896	-382.344	-369.67	-359.745	-375.994	-388.823	-409.096	-318.601	-323.833	-363.221	-354.878	-367.961	-381.902	-390.693	-362.091
Cpy	inters	23.1015	25.94	26.0886	29.3593	19.8158	21.8893	26.0624	26.2099	14.6583	18.2506	25.8616	29.5535	15.0738	18.5111	19.3292	20.5237	13.1703	15.1903	17.5738	20.1304	10.8091	13.4252	17.7173	18.5756	15.4352	20.2222	25.0475	28.8497	13.4491	15.4121	16.7411	19.1841	10.5892	12.2625	15.3313	17.1897	13.3986	17.5259	20.433	22.7681	10.7636	12.6807	15.6901	19.1557	8.79683	9.65631	11.2562	12.5006
	incidence	0.982153	0.976016	0.974041	0.981009	0.990674	0.985186	0.974392	0.972389	1.00121	0.99284	0.977038	0.969019	1.02935	1.01536	1.01339	1.00592	1.03752	1.02664	0.993477	0.98502	1.01226	1.00264	0.990468	0.9862	1.03175	1.01129	0.999336	1.00716	1.01158	1.00475	1.02644	1.05699	1.02676	1.02939	1.01925	1.01387	1.04085	1.02193	1.02629	1.01834	1.02158	1.01371	1.04405	1.03569	1.04031	1.0351	1.02799	1.02826
	loglik	-276.571	-281.524	-337.571	-306.677	-307.037	-336.372	-306.3	-354.345	-391.949	-380.706	-304.688	-277.567	-280.924	-234.228	-252.064	-269.404	-306.104	-302.425	-312.889	-314.104	-427.666	-406.046	-330.941	-338.658	-353.535	-347.139	-339.154	-355.174	-393.067	-452.954	-477.493	-486.016	-418.86	-456.42	-474.242	-526.782	-411.813	-418.941	-404.824	-416.439	-483.717	-546.363	-491.728	-499.132	-417.251	-492.862	-532.241	-581.549
Oam	inters	5.28532	5.41733	5.89921	6.43607	5.20067	5.4082	6.65626	8.08292	5.19479	5.99349	7.16299	9.64028	6.76829	7.41556	8.66603	10.6122	6.20732	6.80337	9.74382	11.9132	6.84677	8.67703	9.43806	11.3957	5.61674	6.61491	8.17669	11.4445	5.33224	6.74169	9.33565	11.3805	7.02154	8.97012	9.67808	11.5881	6.12399	8.67778	11.5715	14.6192	5.84896	8.0427	11.9431	18.4018	6.25596	8.5307	8.48371	10.0516
	incidence	1.00053	0.994923	0.997505	1.04009	0.988115	1.00622	1.03467	1.03961	0.987763	0.994305	1.00791	0.982075	0.999153	0.992547	0.992723	0.994423	0.993009	1.00192	1.00873	1.00727	0.984669	0.982948	0.999746	1.01198	0.997697	0.992663	0.989971	0.991296	0.992245	0.986225	0.986126	0.991182	0.981871	0.980195	0.986657	0.987107	1.00601	1.0005	0.997234	0.992808	1.00263	0.99816	0.993257	0.982988	0.994315	0.990961	0.994047	0.993112
	loglik	-306.67	-343.13	-349.875	-333.174	-351.267	-405.25	-370.996	-338.654	-393.854	-412.992	-418.255	-406.691	-324.431	-350.677	-359.062	-389.222	-370.515	-433.954	-373.773	-363.889	-369.781	-354.29	-383.511	-378.724	-365.718	-392.977	-403.646	-375.69	-404.569	-427.971	-373.852	-370.643	-336.577	-296.563	-319.488	-313.624	-411.04	-411.147	-399.013	-415.092	-413.413	-455.815	-451.078	-432.871	-337.6	-284.742	-354.894	-399.552
		V1	V2	V3	V4	V5	V6	V7	V8	V9	V10	V11	V12	V17	V18	V19	V20	V21	V22	V23	V24	V25	V26	V27	V28	V33	V34	V35	V36	V37	V38	V39	V40	V41	V42	V43	V44	V49	V50	V51	V52	V53	V54	V55	V56	V57	V58	V59	V60
		2.99759e-34	2.02559e-34	4.31892e-35	1.33148e-35	1.28449e-37	1.99663e-38	5.26376e-38	5.67312e-39	3.4683e-36	6.60409e-36	3.26747e-36	3.13777e-36	7.88635e-32	3.72432e-32	3.35213e-32	1.58023e-32	5.38758e-36	1.90291e-36	1.33705e-35	2.02596e-36	2.21506e-31	1.92751e-31	2.40761e-33	3.49139e-34	8.48934e-32	1.76987e-32	1.86111e-32	2.00141e-32	1.77237e-34	1.68951e-34	1.78244e-35	9.2954e-35	1.21105e-27	1.28751e-28	1.65002e-29	2.24371e-30	3.32818e-31	1.49529e-32	9.25256e-32	5.79776e-32	1.94877e-32	5.20214e-34	3.35359e-34	3.73497e-34	3.83342e-23	2.79593e-26	6.69715e-27	2.15706e-26
		0.627098	0.726014	0.873295	0.605253	0.73322	0.814876	0.953127	0.555468	0.708165	0.858255	0.695042	0.686214	0.243455	0.374833	0.396013	0.564517	0.332378	0.539489	0.568729	0.967535	0.756752	0.7947	0.944726	0.899741	0.0530256	0.181628	0.175502	0.16691	0.116689	0.120794	0.164833	0.181655	0.0266217	0.0522599	0.0788095	0.0694206	0.0695543	0.203283	0.187195	0.254009	0.170027	0.188137	0.247446	0.231857	0.00251453	0.0178693	0.0166035	0.023912
		NA	NA	NA	NA	NA	NA	NA	NA	NA	NA	NA	NA	NA	NA	NA	NA	NA	NA	NA	NA	NA	NA	NA	NA	NA	NA	NA	NA	NA	NA	NA	NA	NA	NA	NA	NA	NA	NA	NA	NA	NA	NA	NA	NA	NA	NA	NA	NA
		4.67379e-05	9.9348e-18	1.73924e-34	6.89625e-58	3.08404e-08	2.53621e-24	7.25563e-45	6.26466e-80	0.00333506	4.12389e-16	2.13253e-40	1.75626e-72	7.60921e-05	1.08718e-16	1.05455e-32	5.98941e-59	4.67664e-07	1.85901e-22	7.53202e-41	5.60632e-75	0.00508462	2.1089e-15	1.96037e-39	2.01916e-78	0.000555041	8.83787e-15	3.26098e-32	5.25976e-59	6.06926e-06	2.15883e-20	8.19198e-40	1.86694e-81	0.00740923	1.61905e-14	9.72487e-40	3.11727e-78	0.00138392	1.40826e-13	4.04368e-30	8.2578e-56	5.46748e-05	1.10469e-18	2.41406e-35	9.90347e-73	0.00816149	1.2063e-13	8.38672e-37	1.78904e-73
		0.0535307	0.35124	0.553829	0.211707	0.283335	0.560376	0.827667	0.611262	0.0533066	0.244749	0.22166	0.120349	0.00272272	0.0456157	0.0420062	0.0101815	0.0282366	0.098671	0.19017	0.0348681	0.00623734	0.0399425	0.00640942	0.00553341	2.73077e-05	0.00203869	0.000454636	0.000803106	0.000718357	0.0101237	0.00717138	0.00903737	0.00169705	0.00588314	0.000268775	0.000107864	6.81875e-07	0.000214133	9.33979e-06	1.79473e-05	6.98873e-06	0.000856049	2.97791e-05	4.05086e-05	0.00117577	0.00175951	5.1093e-06	1.54443e-06
		NA	NA	NA	NA	NA	NA	NA	NA	NA	NA	NA	NA	NA	NA	NA	NA	NA	NA	NA	NA	NA	NA	NA	NA	NA	NA	NA	NA	NA	NA	NA	NA	NA	NA	NA	NA	NA	NA	NA	NA	NA	NA	NA	NA	NA	NA	NA	NA
		0.999023	0.999023	0.999023	0.999023	0.998556	0.998556	0.998556	0.998556	0.995227	0.995227	0.995227	0.995227	0.999023	0.999023	0.999023	0.999023	0.998556	0.998556	0.998556	0.998556	0.995227	0.995227	0.995227	0.995227	0.999023	0.999023	0.999023	0.999023	0.998556	0.998556	0.998556	0.998556	0.995227	0.995227	0.995227	0.995227	0.999023	0.999023	0.999023	0.999023	0.998556	0.998556	0.998556	0.998556	0.995227	0.995227	0.995227	0.995227
		1	1	1	1	1	1	1	1	1	1	1	1	1	1	1	1	1	1	1	1	1	1	1	1	1	1	1	1	1	1	1	1	1	1	1	1	1	1	1	1	1	1	1	1	1	1	1	1
		NA	NA	NA	NA	NA	NA	NA	NA	NA	NA	NA	NA	NA	NA	NA	NA	NA	NA	NA	NA	NA	NA	NA	NA	NA	NA	NA	NA	NA	NA	NA	NA	NA	NA	NA	NA	NA	NA	NA	NA	NA	NA	NA	NA	NA	NA	NA	NA
		0.998148	0.998148	0.998148	0.998148	0.996752	0.996752	0.996752	0.996752	0.993368	0.993368	0.993368	0.993368	0.998148	0.998148	0.998148	0.998148	0.996752	0.996752	0.996752	0.996752	0.993368	0.993368	0.993368	0.993368	0.998148	0.998148	0.998148	0.998148	0.996752	0.996752	0.996752	0.996752	0.993368	0.993368	0.993368	0.993368	0.998148	0.998148	0.998148	0.998148	0.996752	0.996752	0.996752	0.996752	0.993368	0.993368	0.993368	0.993368
		1	1	1	1	1	1	1	1	1	1	1	1	1	1	1	1	1	1	1	1	1	1	1	1	1	1	1	1	1	1	1	1	1	1	1	1	1	1	1	1	1	1	1	1	1	1	1	1
		NA	NA	NA	NA	NA	NA	NA	NA	NA	NA	NA	NA	NA	NA	NA	NA	NA	NA	NA	NA	NA	NA	NA	NA	NA	NA	NA	NA	NA	NA	NA	NA	NA	NA	NA	NA	NA	NA	NA	NA	NA	NA	NA	NA	NA	NA	NA	NA
		9.90196e-86	5.9228e-86	1.27229e-83	3.53096e-85	0.00146691	0.000790199	0.000355118	0.000379002	0.988455	0.988455	0.988455	0.988455	2.00214e-83	4.63418e-83	1.58357e-81	5.49849e-83	0.000748651	0.000400755	0.000247136	0.000232485	0.988455	0.988455	0.988455	0.988455	4.59694e-79	4.1981e-78	6.33022e-76	3.50243e-79	0.000232048	0.000238485	0.000145379	9.83609e-05	0.988455	0.988455	0.988455	0.988455	5.06772e-83	3.81391e-83	4.94728e-82	5.91007e-86	8.0108e-05	6.71644e-05	3.93278e-05	2.58305e-05	0.988455	0.988455	0.988455	0.988455
		0.151185	0.0559973	0.0501138	0.0595928	0.306489	0.292157	0.298317	0.647971	1	1	1	1	0.0615963	0.0298632	0.0182382	0.0219862	0.183425	0.180231	0.189919	0.545477	1	1	1	1	0.0288519	0.0198972	0.0125656	0.0092214	0.135256	0.139881	0.14793	0.307604	1	1	1	1	0.0150781	0.0100876	0.00661603	0.0052621	0.125299	0.102628	0.107938	0.150689	1	1	1	1
		NA	NA	NA	NA	NA	NA	NA	NA	NA	NA	NA	NA	NA	NA	NA	NA	NA	NA	NA	NA	NA	NA	NA	NA	NA	NA	NA	NA	NA	NA	NA	NA	NA	NA	NA	NA	NA	NA	NA	NA	NA	NA	NA	NA	NA	NA	NA	NA
		0.998825	5.70149e-16	9.14985e-20	4.65666e-11	0.997419	2.45011e-07	5.55619e-22	5.02409e-12	0.988439	0.988439	1.09112e-25	5.84169e-17	0.998825	3.29361e-16	1.96197e-21	8.51892e-12	0.997419	2.45011e-07	1.24215e-21	5.64748e-12	0.988439	0.988439	7.43771e-26	1.57833e-17	0.998825	1.42392e-16	4.62357e-22	1.49312e-12	0.997419	2.45011e-07	1.08979e-20	1.24637e-11	0.988439	0.988439	5.33055e-26	1.05756e-17	0.998825	4.95755e-16	8.15876e-23	1.98486e-13	0.997419	5.13617e-07	8.32396e-18	4.18623e-10	0.988439	0.988439	3.95644e-26	4.3171e-18
		1	0.260892	0.38561	0.784946	1	0.567003	0.900022	0.952093	1	1	6.4363e-08	1.28502e-12	1	0.450977	0.880225	0.660991	1	0.567003	0.835765	0.854942	1	1	2.88811e-10	4.05555e-14	1	0.74757	0.305034	0.245811	1	0.567003	0.693502	0.859977	1	1	1.24296e-12	2.01681e-15	1	0.846919	0.0229283	0.101364	1	0.907989	0.233479	0.605038	1	1	5.45915e-15	4.46615e-17
		NA	NA	NA	NA	NA	NA	NA	NA	NA	NA	NA	NA	NA	NA	NA	NA	NA	NA	NA	NA	NA	NA	NA	NA	NA	NA	NA	NA	NA	NA	NA	NA	NA	NA	NA	NA	NA	NA	NA	NA	NA	NA	NA	NA	NA	NA	NA	NA
		0.987354	0.987354	0.987354	0.987354	0.987355	0.987355	0.987355	0.987355	0.998823	0.998823	0.998823	0.998823	0.987354	0.987354	0.987354	0.987354	0.987355	0.987355	0.987355	0.987355	0.998823	0.998823	0.998823	0.998823	0.987354	0.987354	0.987354	0.987354	0.987355	0.987355	0.987355	0.987355	0.998823	0.998823	0.998823	0.998823	0.987354	0.987354	0.987354	0.987354	0.987355	0.987355	0.987355	0.987355	0.998823	0.998823	0.998823	0.998823
		1	1	1	1	1	1	1	1	1	1	1	1	1	1	1	1	1	1	1	1	1	1	1	1	1	1	1	1	1	1	1	1	1	1	1	1	1	1	1	1	1	1	1	1	1	1	1	1
		NA	NA	NA	NA	NA	NA	NA	NA	NA	NA	NA	NA	NA	NA	NA	NA	NA	NA	NA	NA	NA	NA	NA	NA	NA	NA	NA	NA	NA	NA	NA	NA	NA	NA	NA	NA	NA	NA	NA	NA	NA	NA	NA	NA	NA	NA	NA	NA
		3.35373e-123	9.84247e-188	1.70581e-284	0	8.92174e-118	1.62127e-205	3.6647e-282	0	7.04135e-114	8.94428e-180	1.52745e-258	0	1.46597e-94	1.05235e-149	3.00224e-229	9.61696e-303	4.87217e-95	1.54327e-169	1.49732e-237	0	2.60207e-92	2.0329e-146	3.59174e-212	1.7175e-274	5.41602e-95	7.61829e-146	1.66407e-223	4.4195e-295	8.73995e-91	1.06103e-162	2.85838e-228	2.03117e-299	3.36512e-92	1.75605e-141	1.7414e-209	3.78788e-265	8.25065e-93	1.88597e-145	3.75573e-221	1.20458e-287	6.97071e-87	2.87629e-157	3.93675e-216	1.20445e-287	6.00902e-88	2.19246e-136	4.32063e-199	4.90688e-252
		0.388835	0.781799	0.995521	0.572619	0.195402	0.927137	0.386215	0.572619	0.0373805	0.333239	0.170212	0.590935	0.515375	0.610603	0.792108	0.822419	0.154692	0.777662	0.515458	0.765242	0.0511245	0.406868	0.184149	0.657323	0.408723	0.763202	0.951192	0.695474	0.222096	0.907221	0.43456	0.670056	0.199558	0.788346	0.730141	0.967223	0.231428	0.75305	0.860062	0.572243	0.854931	0.672294	0.372484	0.572243	0.693608	0.850512	0.944362	0.688592
		NA	NA	NA	NA	NA	NA	NA	NA	NA	NA	NA	NA	NA	NA	NA	NA	NA	NA	NA	NA	NA	NA	NA	NA	NA	NA	NA	NA	NA	NA	NA	NA	NA	NA	NA	NA	NA	NA	NA	NA	NA	NA	NA	NA	NA	NA	NA	NA
		0.989433	0.989433	0.989433	0.989433	0.981859	0.981859	0.981859	0.981859	0.997192	0.997192	0.997192	0.997192	0.989433	0.989433	0.989433	0.989433	0.981859	0.981859	0.981859	0.981859	0.997192	0.997192	0.997192	0.997192	0.989433	0.989433	0.989433	0.989433	0.981859	0.981859	0.981859	0.981859	0.997192	0.997192	0.997192	0.997192	0.989433	0.989433	0.989433	0.989433	0.981859	0.981859	0.981859	0.981859	0.997192	0.997192	0.997192	0.997192
		1	1	1	1	1	1	1	1	1	1	1	1	1	1	1	1	1	1	1	1	1	1	1	1	1	1	1	1	1	1	1	1	1	1	1	1	1	1	1	1	1	1	1	1	1	1	1	1
		NA	NA	NA	NA	NA	NA	NA	NA	NA	NA	NA	NA	NA	NA	NA	NA	NA	NA	NA	NA	NA	NA	NA	NA	NA	NA	NA	NA	NA	NA	NA	NA	NA	NA	NA	NA	NA	NA	NA	NA	NA	NA	NA	NA	NA	NA	NA	NA
		5.50536e-13	1.97114e-37	1.38217e-78	6.33999e-145	9.02251e-12	8.05021e-23	4.58635e-58	8.79405e-124	2.57318e-13	4.75993e-34	5.73787e-70	1.73519e-134	2.35377e-11	1.16728e-34	6.14975e-77	2.78034e-148	1.05681e-09	4.23327e-21	6.57359e-56	2.72095e-128	5.92486e-12	2.1143e-30	4.06221e-67	3.10623e-137	2.71789e-10	8.4401e-33	1.71724e-74	7.3292e-147	1.75447e-08	9.30416e-20	1.60755e-53	6.63362e-125	3.93104e-11	1.44696e-29	1.46957e-64	1.88925e-132	2.03662e-09	2.41374e-31	1.08124e-72	1.57084e-139	6.93207e-08	1.06074e-18	1.08912e-51	4.52978e-120	7.0608e-11	9.62565e-30	5.40798e-63	5.99476e-131
		1.30747e-05	4.04081e-06	6.98469e-06	8.74122e-07	1.63813e-05	6.64037e-05	2.4716e-05	1.24477e-06	0.000462873	0.0321017	0.0021527	0.0009157	3.87924e-05	2.08981e-05	3.11128e-05	1.08684e-06	8.27643e-05	0.000659879	0.00018186	3.47101e-06	0.00304955	0.285014	0.0181805	0.0029459	0.000131057	8.29219e-05	0.000116671	1.83287e-06	0.000452192	0.00275853	0.00084424	1.38688e-05	0.00981791	0.423435	0.058902	0.00854327	0.000462111	0.000274127	0.000318124	6.41447e-06	0.00122512	0.00857418	0.00274833	5.04523e-05	0.0140688	0.390826	0.112779	0.0143419
		NA	NA	NA	NA	NA	NA	NA	NA	NA	NA	NA	NA	NA	NA	NA	NA	NA	NA	NA	NA	NA	NA	NA	NA	NA	NA	NA	NA	NA	NA	NA	NA	NA	NA	NA	NA	NA	NA	NA	NA	NA	NA	NA	NA	NA	NA	NA	NA
		0.990408	0.990408	0.990408	0.990408	0.99902	0.99902	0.99902	0.99902	0.997112	0.997112	0.997112	0.997112	0.990408	0.990408	0.990408	0.990408	0.99902	0.99902	0.99902	0.99902	0.997112	0.997112	0.997112	0.997112	0.990408	0.990408	0.990408	0.990408	0.99902	0.99902	0.99902	0.99902	0.997112	0.997112	0.997112	0.997112	0.990408	0.990408	0.990408	0.990408	0.99902	0.99902	0.99902	0.99902	0.997112	0.997112	0.997112	0.997112
		1	1	1	1	1	1	1	1	1	1	1	1	1	1	1	1	1	1	1	1	1	1	1	1	1	1	1	1	1	1	1	1	1	1	1	1	1	1	1	1	1	1	1	1	1	1	1	1
		NA	NA	NA	NA	NA	NA	NA	NA	NA	NA	NA	NA	NA	NA	NA	NA	NA	NA	NA	NA	NA	NA	NA	NA	NA	NA	NA	NA	NA	NA	NA	NA	NA	NA	NA	NA	NA	NA	NA	NA	NA	NA	NA	NA	NA	NA	NA	NA
		5.18199e-61	7.49342e-97	2.76099e-126	2.05813e-179	5.53381e-62	1.89072e-93	6.02349e-124	8.06389e-178	1.45916e-63	1.57168e-98	1.8424e-133	4.54755e-171	8.91608e-61	2.39336e-95	1.73573e-123	2.62637e-179	9.21758e-62	1.4939e-92	2.2966e-123	1.35801e-179	6.07878e-63	8.85817e-97	3.22359e-129	4.81905e-176	2.20716e-58	3.9465e-90	1.87234e-120	2.33548e-174	3.31389e-59	1.69566e-87	1.14005e-115	5.72505e-172	1.34299e-61	4.27268e-93	3.21587e-126	6.47034e-167	4.40329e-56	1.12617e-87	1.11351e-112	3.26829e-158	6.65688e-57	1.39724e-83	4.15885e-110	3.45773e-151	2.09351e-57	6.67243e-89	2.39382e-124	1.93798e-160
		0.105933	0.629926	0.934602	0.0306086	0.121462	0.479428	0.823504	0.0177117	0.0986065	0.409289	0.228611	0.294004	0.0683694	0.426856	0.953086	0.156381	0.0779741	0.407021	0.66525	0.08637	0.0383435	0.143049	0.0712141	0.744923	0.0214923	0.192627	0.398981	0.366012	0.0265868	0.178029	0.495979	0.212584	0.023342	0.105658	0.0565121	0.74274	0.022555	0.142713	0.415206	0.203385	0.0274071	0.13979	0.474413	0.0553342	0.00972063	0.0409042	0.00993483	0.971507
		NA	NA	NA	NA	NA	NA	NA	NA	NA	NA	NA	NA	NA	NA	NA	NA	NA	NA	NA	NA	NA	NA	NA	NA	NA	NA	NA	NA	NA	NA	NA	NA	NA	NA	NA	NA	NA	NA	NA	NA	NA	NA	NA	NA	NA	NA	NA	NA
		NA	NA	NA	NA	NA	NA	NA	NA	NA	NA	NA	NA	NA	NA	NA	NA	NA	NA	NA	NA	NA	NA	NA	NA	NA	NA	NA	NA	NA	NA	NA	NA	NA	NA	NA	NA	NA	NA	NA	NA	NA	NA	NA	NA	NA	NA	NA	NA
		NA	NA	NA	NA	NA	NA	NA	NA	NA	NA	NA	NA	NA	NA	NA	NA	NA	NA	NA	NA	NA	NA	NA	NA	NA	NA	NA	NA	NA	NA	NA	NA	NA	NA	NA	NA	NA	NA	NA	NA	NA	NA	NA	NA	NA	NA	NA	NA
		NA	NA	NA	NA	NA	NA	NA	NA	NA	NA	NA	NA	NA	NA	NA	NA	NA	NA	NA	NA	NA	NA	NA	NA	NA	NA	NA	NA	NA	NA	NA	NA	NA	NA	NA	NA	NA	NA	NA	NA	NA	NA	NA	NA	NA	NA	NA	NA
		3.65578e-207	7.49927e-234	2.46281e-269	0	1.33993e-154	4.67354e-208	1.69201e-209	6.03539e-236	6.46269e-84	3.34778e-122	5.58964e-200	2.02607e-258	8.37399e-182	3.07237e-202	5.03203e-233	1.83293e-273	1.66837e-133	1.51202e-179	1.17835e-192	4.92304e-217	1.55228e-74	7.67606e-109	7.88502e-176	7.24414e-222	5.23473e-160	5.38401e-184	7.96529e-214	5.59435e-250	1.94246e-130	1.10453e-170	3.68775e-180	1.64228e-200	1.126e-71	2.91585e-105	1.07904e-165	1.53785e-212	4.32634e-144	6.37929e-177	2.40796e-226	2.11781e-289	2.87215e-119	1.24274e-151	1.23201e-161	3.12208e-182	8.6494e-67	3.43799e-99	2.77535e-159	4.10643e-206
		9.21341e-05	2.1355e-06	9.92002e-06	6.28611e-08	3.48188e-05	2.6946e-05	9.91251e-12	1.17751e-11	5.15232e-05	0.00132341	0.0746582	0.080472	0.00285044	0.00050663	2.27678e-06	3.74179e-10	4.3969e-05	2.11263e-06	6.74871e-11	2.5117e-11	1.64248e-05	0.000511699	0.0149406	0.0104879	0.123854	0.10495	0.000839486	0.00011379	0.000863333	6.28616e-05	2.6294e-06	3.76292e-07	5.04393e-05	0.00115458	0.020278	0.00320083	0.149016	0.120836	0.154152	0.0238561	0.00140484	0.00193532	0.00150203	0.00944563	0.000127218	0.0023524	0.0467408	0.058557
		NA	NA	NA	NA	NA	NA	NA	NA	NA	NA	NA	NA	NA	NA	NA	NA	NA	NA	NA	NA	NA	NA	NA	NA	NA	NA	NA	NA	NA	NA	NA	NA	NA	NA	NA	NA	NA	NA	NA	NA	NA	NA	NA	NA	NA	NA	NA	NA
		6.48549e-190	1.35304e-194	4.50877e-200	8.12074e-196	9.23844e-200	5.87947e-202	1.89923e-188	8.10394e-190	6.23149e-251	1.29544e-257	3.70008e-234	7.01418e-241	2.2154e-123	4.95418e-132	1.91683e-141	6.92023e-145	2.00876e-171	1.1272e-151	2.15803e-139	2.24228e-136	4.09715e-215	1.71792e-197	2.02442e-185	5.38428e-181	2.13458e-67	6.40532e-105	5.07647e-114	4.80993e-112	5.50764e-264	1.46934e-286	4.85666e-229	2.48838e-177	0	0	8.34401e-266	2.13078e-247	1.33705e-108	5.49454e-149	8.3606e-126	1.98657e-93	0	0	5.75057e-256	3.67942e-195	2.87471e-292	5.03788e-283	1.18669e-298	3.56275e-285
		2.93755e-11	2.21702e-14	4.36104e-13	1.28642e-13	2.12527e-13	4.48106e-15	7.70039e-30	2.31529e-32	2.18968e-15	4.94621e-16	3.52399e-23	1.53065e-22	1.18002e-17	1.90333e-18	1.04053e-14	4.16642e-12	2.55763e-14	6.61266e-21	7.06193e-36	5.7769e-37	1.82443e-16	1.63881e-20	7.69214e-25	1.11393e-26	2.11672e-21	8.16629e-14	1.64341e-09	3.2556e-10	0.00162955	0.00205484	7.32068e-27	1.71107e-36	4.25363e-05	0.000276461	4.97002e-08	6.94507e-09	4.86657e-23	1.04279e-33	3.65929e-36	4.6598e-39	0.00229009	1.45464e-06	5.95348e-59	3.25732e-76	0.00163392	8.48927e-08	1.53852e-05	1.19376e-10
		NA	NA	NA	NA	NA	NA	NA	NA	NA	NA	NA	NA	NA	NA	NA	NA	NA	NA	NA	NA	NA	NA	NA	NA	NA	NA	NA	NA	NA	NA	NA	NA	NA	NA	NA	NA	NA	NA	NA	NA	NA	NA	NA	NA	NA	NA	NA	NA
		0.997919	4.98511e-19	1.98688e-16	4.32929e-06	0.989316	0.989316	5.37319e-21	3.50475e-14	0.99697	0.99697	2.58052e-19	7.66615e-21	0.997919	1.3712e-20	2.56624e-15	2.11686e-06	0.989316	0.989316	1.57559e-20	7.11664e-14	0.99697	0.99697	1.19113e-18	2.37949e-20	0.997919	6.28859e-21	4.23271e-15	8.901e-07	0.989316	0.989316	7.7102e-21	5.27215e-15	0.99697	0.99697	8.63841e-19	1.26825e-20	0.997919	3.48699e-21	2.34342e-14	4.96923e-07	0.989316	0.989316	9.0118e-21	6.73513e-15	0.99697	0.99697	1.25475e-18	5.08198e-21
		1	0.387553	0.087483	0.0961662	1	1	0.669537	0.0531897	1	1	0.0731768	1.45372e-08	1	0.451419	0.355035	0.0172492	1	1	0.39446	0.0931982	1	1	0.706139	1.05517e-07	1	0.544913	0.813242	0.0098466	1	1	0.528711	0.0809553	1	1	0.184225	1.14695e-08	1	0.653041	0.927627	0.012867	1	1	0.476978	0.244036	1	1	0.0160609	6.90906e-10
		NA	NA	NA	NA	NA	NA	NA	NA	NA	NA	NA	NA	NA	NA	NA	NA	NA	NA	NA	NA	NA	NA	NA	NA	NA	NA	NA	NA	NA	NA	NA	NA	NA	NA	NA	NA	NA	NA	NA	NA	NA	NA	NA	NA	NA	NA	NA	NA
		2.67675e-295	0	0	0	0	0	0	0	2.95783e-197	4.5959e-242	3.4229e-274	0	6.54605e-223	3.59656e-260	3.7573e-291	0	0	0	0	0	5.53636e-152	1.15647e-188	1.22102e-217	1.98377e-238	2.60716e-211	7.24728e-218	9.66188e-243	0	0	0	0	0	1.89324e-122	7.05661e-157	2.02296e-199	2.25347e-211	3.91704e-177	1.23989e-162	1.03499e-162	3.58544e-186	1.2316e-253	3.0471e-279	0	0	1.77377e-101	3.23017e-132	3.43161e-163	4.99117e-159
		0.319136	0.803067	0.17406	0.295599	0.477698	0.506335	0.734771	0.970341	0.120734	0.909508	0.393507	0.238286	0.216966	0.290452	0.184372	0.0621806	0.00128663	2.16017e-05	0.000679463	0.00357452	0.0985935	0.0855954	0.0565589	0.0133331	8.55785e-06	1.22172e-09	8.17385e-13	3.27032e-13	0.000695692	3.80218e-05	0.000122932	0.000306966	1.73741e-07	5.89624e-09	5.89819e-08	6.33542e-13	3.51735e-14	2.33395e-25	1.5728e-34	1.49727e-43	2.03647e-08	2.88625e-09	2.8897e-08	2.87251e-06	1.35865e-16	4.12713e-20	3.09011e-22	2.16099e-38
		NA	NA	NA	NA	NA	NA	NA	NA	NA	NA	NA	NA	NA	NA	NA	NA	NA	NA	NA	NA	NA	NA	NA	NA	NA	NA	NA	NA	NA	NA	NA	NA	NA	NA	NA	NA	NA	NA	NA	NA	NA	NA	NA	NA	NA	NA	NA	NA
		0.999008	0.999008	0.999008	0.999008	0.98844	0.98844	0.98844	0.98844	0.996488	0.996488	0.996488	0.996488	0.999008	0.999008	0.999008	0.999008	0.98844	0.98844	0.98844	0.98844	0.996488	0.996488	0.996488	0.996488	0.999008	0.999008	0.999008	0.999008	0.98844	0.98844	0.98844	0.98844	0.996488	0.996488	0.996488	0.996488	0.999008	0.999008	0.999008	0.999008	0.98844	0.98844	0.98844	0.98844	0.996488	0.996488	0.996488	0.996488
		1	1	1	1	1	1	1	1	1	1	1	1	1	1	1	1	1	1	1	1	1	1	1	1	1	1	1	1	1	1	1	1	1	1	1	1	1	1	1	1	1	1	1	1	1	1	1	1
		NA	NA	NA	NA	NA	NA	NA	NA	NA	NA	NA	NA	NA	NA	NA	NA	NA	NA	NA	NA	NA	NA	NA	NA	NA	NA	NA	NA	NA	NA	NA	NA	NA	NA	NA	NA	NA	NA	NA	NA	NA	NA	NA	NA	NA	NA	NA	NA
		0.989208	0.989208	0.989208	0.989208	0.999362	0.999362	0.999448	0.999448	0.98795	0.98795	0.99754	0.99754	0.989208	0.989208	0.989208	0.989208	0.999362	0.999362	0.999448	0.999448	0.98795	0.98795	0.99754	0.99754	0.989208	0.989208	0.989208	0.989208	0.999362	0.999362	0.999448	0.999448	0.98795	0.98795	0.99754	0.99754	0.989208	0.989208	0.989208	0.989208	0.999362	0.999362	0.999448	0.999448	0.98795	0.98795	0.99754	0.99754
		1	1	1	1	1	1	1	1	1	1	1	1	1	1	1	1	1	1	1	1	1	1	1	1	1	1	1	1	1	1	1	1	1	1	1	1	1	1	1	1	1	1	1	1	1	1	1	1
		NA	NA	NA	NA	NA	NA	NA	NA	NA	NA	NA	NA	NA	NA	NA	NA	NA	NA	NA	NA	NA	NA	NA	NA	NA	NA	NA	NA	NA	NA	NA	NA	NA	NA	NA	NA	NA	NA	NA	NA	NA	NA	NA	NA	NA	NA	NA	NA
		0	0	2.25116e-295	0	3.61382e-267	3.22994e-295	0	0	2.1521e-203	9.29067e-243	1.1977e-230	7.45493e-280	0	0	0	9.76922e-297	0	0	0	0	1.71123e-257	4.01113e-299	2.52893e-304	0	0	0	0	0	0	0	0	0	0	0	0	0	0	0	0	0	0	0	0	0	0	0	0	0
		0.0463786	0.0768692	0.720575	0.375943	0.99761	0.366224	0.0328118	0.000782505	0.157143	0.339594	0.161473	0.228561	0.00270521	0.00578031	0.117695	0.470844	0.123237	0.19911	0.0822597	0.0125525	0.529076	0.648988	0.787702	0.752182	6.68007e-07	4.98104e-05	0.000828553	0.000582686	0.000593658	6.41476e-05	4.69142e-06	6.47143e-09	0.189498	0.722805	0.0841171	6.42349e-05	1.55193e-21	9.80806e-18	2.28736e-17	8.4472e-22	4.10145e-10	1.41579e-17	1.78883e-18	9.52153e-22	0.0393553	0.538721	0.0602525	2.54979e-08
		NA	NA	NA	NA	NA	NA	NA	NA	NA	NA	NA	NA	NA	NA	NA	NA	NA	NA	NA	NA	NA	NA	NA	NA	NA	NA	NA	NA	NA	NA	NA	NA	NA	NA	NA	NA	NA	NA	NA	NA	NA	NA	NA	NA	NA	NA	NA	NA
		0.34933	0.000141805	9.39225e-12	1.23928e-32	0.454678	0.00454561	1.43474e-08	1.42569e-27	0.609039	0.00124393	3.52384e-09	7.72147e-30	0.387294	8.3575e-05	1.70801e-12	4.62702e-34	0.364754	0.00408298	3.58043e-09	1.34506e-29	0.509558	0.00171735	1.54745e-09	2.87205e-31	0.360472	6.83645e-05	5.94525e-12	5.44177e-33	0.399376	0.00369361	7.70468e-09	4.49707e-28	0.556468	0.00144845	1.65849e-09	1.63992e-30	0.282753	6.14522e-05	1.76262e-11	4.12064e-32	0.389249	0.00217785	2.84619e-09	1.0934e-28	0.556602	0.00077287	3.33504e-09	6.31966e-30
		0.0358162	0.0424881	0.0177761	0.00393972	0.0213251	0.0389067	0.0242241	0.0108157	0.0242705	0.0291653	0.0241595	0.0042116	0.0463851	0.0395991	0.0178448	0.00404965	0.0352636	0.0515198	0.0243454	0.0103419	0.0392492	0.0419267	0.0225984	0.00401702	0.0387035	0.0327634	0.0223396	0.00536716	0.0287779	0.0456164	0.025371	0.0124434	0.031063	0.0345488	0.0236561	0.00425525	0.0220879	0.0296707	0.01558	0.00352278	0.0304973	0.0247115	0.0130499	0.00718589	0.0310429	0.0176644	0.0232838	0.00390487
		NA	NA	NA	NA	NA	NA	NA	NA	NA	NA	NA	NA	NA	NA	NA	NA	NA	NA	NA	NA	NA	NA	NA	NA	NA	NA	NA	NA	NA	NA	NA	NA	NA	NA	NA	NA	NA	NA	NA	NA	NA	NA	NA	NA	NA	NA	NA	NA
		0.263364	6.16699e-18	7.69976e-69	1.42344e-133	1.83358e-10	2.10839e-24	2.53484e-34	1.91749e-70	4.01417e-11	5.39734e-28	5.57292e-46	2.52931e-55	0.0362615	1.34516e-16	9.4232e-72	1.63218e-127	3.11019e-09	7.65139e-18	2.62249e-24	6.26667e-59	4.12324e-12	1.32157e-25	3.31187e-40	3.29228e-49	0.00130463	1.32382e-23	6.40706e-78	1.42014e-153	5.76548e-13	1.36128e-28	1.08563e-32	1.28114e-67	1.82974e-15	1.78209e-27	5.06365e-44	6.73996e-52	7.91944e-10	1.27549e-42	1.38885e-129	1.70546e-236	2.04295e-20	2.20925e-44	7.29731e-63	3.42092e-117	1.24814e-17	9.13944e-33	1.08298e-46	2.38411e-62
		7.54694e-24	6.72573e-13	0.00106475	0.624354	5.81312e-05	0.000109706	1.63041e-05	0.00276385	1.02205e-09	4.87415e-06	0.000446697	0.00144931	5.11715e-16	5.34602e-11	0.015419	0.447142	2.69366e-06	2.91521e-08	1.39839e-10	3.77382e-07	1.57795e-08	8.71855e-06	8.90948e-05	0.00046116	2.54801e-12	3.00783e-11	0.000155492	0.358982	0.000336304	2.19388e-05	6.38882e-08	2.32696e-06	0.00112445	0.0206932	0.0620047	0.0642176	4.70548e-07	3.02125e-08	0.00151372	0.402894	0.000886006	0.000174102	6.52277e-05	9.08653e-06	0.000808586	0.00285685	0.00333115	0.00177431
		NA	NA	NA	NA	NA	NA	NA	NA	NA	NA	NA	NA	NA	NA	NA	NA	NA	NA	NA	NA	NA	NA	NA	NA	NA	NA	NA	NA	NA	NA	NA	NA	NA	NA	NA	NA	NA	NA	NA	NA	NA	NA	NA	NA	NA	NA	NA	NA
		0.999124	0.999124	0.999124	0.999124	0.998038	0.998038	0.998038	0.998038	0.998113	0.998113	0.998113	0.998113	0.999124	0.999124	0.999124	0.999124	0.998038	0.998038	0.998038	0.998038	0.998113	0.998113	0.998113	0.998113	0.999124	0.999124	0.999124	0.999124	0.998038	0.998038	0.998038	0.998038	0.998113	0.998113	0.998113	0.998113	0.999124	0.999124	0.999124	0.999124	0.998038	0.998038	0.998038	0.998038	0.998113	0.998113	0.998113	0.998113
		1	1	1	1	1	1	1	1	1	1	1	1	1	1	1	1	1	1	1	1	1	1	1	1	1	1	1	1	1	1	1	1	1	1	1	1	1	1	1	1	1	1	1	1	1	1	1	1
		NA	NA	NA	NA	NA	NA	NA	NA	NA	NA	NA	NA	NA	NA	NA	NA	NA	NA	NA	NA	NA	NA	NA	NA	NA	NA	NA	NA	NA	NA	NA	NA	NA	NA	NA	NA	NA	NA	NA	NA	NA	NA	NA	NA	NA	NA	NA	NA
		0	0	0	0	0	0	0	0	0	0	0	0	0	0	0	NA	0	0	NA	NA	0	0	0	0	NA	NA	NA	NA	0	0	NA	NA	0	0	NA	NA	NA	NA	NA	NA	0	0	NA	NA	0	0	0	0
		0.0241138	0.0233886	0.00343373	0.00241684	0.00749461	0.00501849	0.0023706	0.00159291	0.0128266	0.00818263	0.0132156	0.0139547	0.87696	0.86964	0.968766	NA	0.00610192	0.967202	NA	NA	0.0256958	0.00112321	0.968012	0.967202	NA	NA	NA	NA	0.0045988	0.946645	NA	NA	0.869236	0.000724443	NA	NA	NA	NA	NA	NA	0.0143552	0.971331	NA	NA	0.00965408	0.877734	0.872333	0.0237127
		NA	NA	NA	NA	NA	NA	NA	NA	NA	NA	NA	NA	NA	NA	NA	NA	NA	NA	NA	NA	NA	NA	NA	NA	NA	NA	NA	NA	NA	NA	NA	NA	NA	NA	NA	NA	NA	NA	NA	NA	NA	NA	NA	NA	NA	NA	NA	NA
		0	0	0	0	0	0	0	0	0	0	0	0	0	0	0	0	0	0	0	0	0	0	0	0	0	0	0	0	0	0	0	0	0	0	0	0	0	0	0	0	0	0	0	0	0	0	0	0
		0.340836	9.95289e-21	2.04798e-29	2.46701e-39	0.131468	0.202068	0.23949	0.377555	0.585703	0.768829	0.129891	0.0688493	0.579151	9.70327e-19	7.42667e-25	4.6015e-25	0.998152	0.757057	0.934366	0.803931	0.847359	0.916252	0.738308	0.559704	0.940775	2.89031e-12	1.29929e-18	5.18645e-15	0.254888	2.1038e-05	0.000123528	0.000121802	0.339416	2.80198e-05	1.28902e-05	6.12933e-05	0.493069	1.6115e-06	1.81862e-08	1.41872e-07	0.164585	0.00171474	0.0194118	0.00308716	0.166694	0.10764	0.154938	0.569762
		NA	NA	NA	NA	NA	NA	NA	NA	NA	NA	NA	NA	NA	NA	NA	NA	NA	NA	NA	NA	NA	NA	NA	NA	NA	NA	NA	NA	NA	NA	NA	NA	NA	NA	NA	NA	NA	NA	NA	NA	NA	NA	NA	NA	NA	NA	NA	NA
		0	0	0	0	0	0	0	0	0	0	0	0	0	0	0	0	0	0	0	0	0	0	0	0	0	0	0	0	0	0	0	0	0	0	0	0	0	0	0	0	0	0	0	0	0	0	0	0
		0.00833371	0.000213307	1.5009e-05	2.31699e-06	0.00782187	0.00143422	8.88986e-05	1.54015e-05	0.0096617	0.00277514	5.17483e-05	0.000227771	0.01583	0.00101732	3.08627e-05	4.89611e-06	0.0157963	0.0019303	0.000162054	5.91862e-05	0.018478	0.00366734	0.000100246	0.00020456	0.0242738	0.0179371	0.000638934	3.29094e-05	0.130117	0.0250306	0.00196534	0.000852722	0.0561539	0.0126847	0.000709719	5.0394e-05	0.0336105	0.030723	0.00117032	6.12249e-06	0.0359215	0.0205099	0.00518441	0.000159946	0.0422545	0.0239486	0.00318308	0.000357793
		NA	NA	NA	NA	NA	NA	NA	NA	NA	NA	NA	NA	NA	NA	NA	NA	NA	NA	NA	NA	NA	NA	NA	NA	NA	NA	NA	NA	NA	NA	NA	NA	NA	NA	NA	NA	NA	NA	NA	NA	NA	NA	NA	NA	NA	NA	NA	NA
		0	0	0	0	0	0	0	0	0	0	0	0	0	0	0	0	0	0	0	0	0	0	0	0	0	0	0	0	0	0	0	0	0	0	0	0	0	0	0	0	0	0	0	0	0	0	0	0
		1.17702e-06	7.09626e-06	1.0742e-07	2.78756e-05	9.20032e-06	9.90817e-07	5.16032e-06	3.29274e-06	3.70829e-06	8.41475e-06	5.6425e-06	8.46825e-06	6.99842e-07	2.66047e-06	4.08985e-08	3.71281e-05	4.16177e-06	6.79385e-07	6.93726e-06	2.43111e-06	2.7157e-06	6.71629e-06	5.15126e-06	4.07672e-06	6.08398e-08	5.32789e-06	9.95694e-08	9.87203e-10	6.24836e-06	1.20388e-06	6.69759e-06	5.30029e-07	2.22019e-06	5.31891e-06	2.81577e-06	3.71218e-06	5.19912e-08	1.25744e-05	6.79346e-08	1.06215e-08	8.35042e-06	1.5465e-06	2.0006e-06	3.33762e-08	3.95267e-06	9.77298e-06	8.65859e-06	2.30968e-06
		NA	NA	NA	NA	NA	NA	NA	NA	NA	NA	NA	NA	NA	NA	NA	NA	NA	NA	NA	NA	NA	NA	NA	NA	NA	NA	NA	NA	NA	NA	NA	NA	NA	NA	NA	NA	NA	NA	NA	NA	NA	NA	NA	NA	NA	NA	NA	NA
		0	0	0	0	0	0	0	0	0	0	0	0	0	0	0	0	0	0	0	0	0	0	0	0	0	0	0	0	0	0	0	0	0	0	0	0	0	0	0	0	0	0	0	0	0	0	0	0
		4.09214e-05	0.00015465	0.000333188	3.88984e-08	0.247088	0.0879682	0.0466539	0.274989	0.000334344	1.93152e-05	2.85342e-07	0.013963	9.62368e-10	4.20673e-09	1.34889e-07	9.47105e-06	0.0916453	0.0375122	0.110341	0.834591	0.000131883	6.00123e-06	5.9364e-08	0.0114841	2.45019e-19	2.3472e-18	5.40667e-19	3.20258e-16	6.38263e-12	1.74372e-13	2.07833e-13	1.60086e-10	1.51151e-08	9.7666e-12	2.44114e-11	1.21195e-07	1.13521e-20	1.50322e-23	2.49285e-22	1.56811e-13	3.0285e-15	4.70278e-19	4.05168e-18	1.27861e-13	5.38652e-08	1.70393e-09	8.10705e-09	0.000120616
		NA	NA	NA	NA	NA	NA	NA	NA	NA	NA	NA	NA	NA	NA	NA	NA	NA	NA	NA	NA	NA	NA	NA	NA	NA	NA	NA	NA	NA	NA	NA	NA	NA	NA	NA	NA	NA	NA	NA	NA	NA	NA	NA	NA	NA	NA	NA	NA
		0	0	0	0	0	0	0	0	0	0	0	0	0	0	0	0	0	0	0	0	0	0	0	0	0	0	0	0	0	0	0	0	0	0	0	0	0	0	0	0	0	0	0	0	0	0	0	0
		0.00496229	0.000194844	7.38846e-05	0.0143503	0.133294	0.0187196	8.78639e-05	3.25566e-05	0.848886	0.255186	0.000319744	2.0703e-06	5.96086e-05	0.0375797	0.0688009	0.433639	2.81137e-07	0.000326142	0.303773	0.0218043	0.0561227	0.683215	0.1438	0.0387752	8.45766e-06	0.123885	0.927316	0.310378	0.049321	0.425243	0.000208967	3.59557e-13	1.47863e-06	1.11561e-07	0.000645688	0.0150016	8.68587e-09	0.00243759	0.000212929	0.0108012	0.000214329	0.0203337	2.52226e-10	1.51097e-07	1.21406e-14	3.78124e-11	1.73323e-07	6.26173e-08
		NA	NA	NA	NA	NA	NA	NA	NA	NA	NA	NA	NA	NA	NA	NA	NA	NA	NA	NA	NA	NA	NA	NA	NA	NA	NA	NA	NA	NA	NA	NA	NA	NA	NA	NA	NA	NA	NA	NA	NA	NA	NA	NA	NA	NA	NA	NA	NA
		9.41346e-271	3.9812e-277	0	2.09946e-265	1.52594e-262	5.65196e-268	4.70698e-301	0	2.22234e-264	5.43311e-307	0	0	0	0	0	0	0	0	0	0	0	0	0	0	1.6148e-266	0	0	0	4.35166e-255	0	0	0	0	0	0	0	1.07676e-237	0	0	0	7.23599e-250	0	0	0	4.53126e-301	0	0	0
		0.921637	0.419544	0.693529	0.00442426	0.124762	0.468977	0.0119729	0.00402636	0.12691	0.566123	0.599454	0.274287	0.862414	0.179834	0.211134	0.289039	0.243522	0.771579	0.227994	0.290103	0.0325117	0.0569168	0.982616	0.33499	0.475621	0.0338862	0.00681562	0.019999	0.0582636	0.00121963	0.00162351	0.0538777	0.00182689	0.00117947	0.0329893	0.0276144	7.81551e-05	0.752232	0.084772	2.30961e-05	0.115689	0.285841	0.000291722	8.87469e-16	0.0737006	0.00302536	0.0353108	0.0103731
		NA	NA	NA	NA	NA	NA	NA	NA	NA	NA	NA	NA	NA	NA	NA	NA	NA	NA	NA	NA	NA	NA	NA	NA	NA	NA	NA	NA	NA	NA	NA	NA	NA	NA	NA	NA	NA	NA	NA	NA	NA	NA	NA	NA	NA	NA	NA	NA
Aal	inters	1.97157	1.97464	1.98702	1.99673	2.0289	2.04341	2.03578	2.05357	2.00622	2.00097	2.00671	2.00704	1.93017	1.93605	1.93688	1.94286	2.00113	2.00896	1.99608	2.01098	1.92289	1.92404	1.9582	1.9729	1.92858	1.94041	1.94003	1.93947	1.97523	1.97558	1.99228	1.98	1.85641	1.87442	1.89078	1.9042	1.91798	1.94169	1.92774	1.93134	1.93968	1.96711	1.9704	1.96959	1.7692	1.82981	1.8416	1.83189
	incidence																																	1.009												1.01138	1.0095	1.00955	1.00918
	loglik
Gpy	inters	1.30573	1.67561	2.00816	2.39061	1.42105	1.8157	2.17995	2.71089	1.21775	1.63625	2.10127	2.5947	1.29784	1.65442	1.98388	2.42073	1.38265	1.78122	2.12234	2.65822	1.20811	1.62146	2.0938	2.6967	1.25967	1.61076	1.98398	2.43546	1.34311	1.74014	2.11396	2.76987	1.19893	1.60128	2.1051	2.70834	1.24058	1.58152	1.94965	2.39433	1.30569	1.70449	2.04383	2.658	1.19652	1.57987	2.05914	2.64839
	incidence													1.0076	1.00493	1.00459	1.00555	1.0058			1.00479	1.00732	1.00537	1.00652	1.00669	1.00982	1.00705	1.00712	1.00649	1.00818	1.00591	1.00577	1.00527	1.00814	1.00682	1.00815	1.0087	1.0111	1.00816	1.00857	1.00793	1.01015	1.00731	1.00826	1.00772	1.00835	1.00756	1.00973	1.01034
	loglik
Lti	inters
	incidence
	loglik
Sci	inters
	incidence
	loglik
Pvo	inters	3.1079	3.10465	3.06699	3.09105	1.27423	1.289	1.3075	1.30525					3.07308	3.06209	3.0361	3.05824	1.29077	1.30495	1.31587	1.31603					3.00537	2.98621	2.95255	3.00004	1.31721	1.31658	1.32738	1.33453					3.07669	3.08081	3.07082	3.12781	1.33932	1.34314	1.35398	1.36153
	incidence														0.96914	0.962184	0.964984									0.967944	0.962541	0.953386	0.945864									0.959989	0.952534	0.939318	0.9216
	loglik
Cfi	inters		0.064469	0.211288	0.477471		0.00429203	0.232855	0.451361			0.0925175	0.370951		0.0460532	0.190422	0.4626		0.00429203	0.238724	0.454335			0.0925162	0.357343		0.0357964	0.190966	0.445536		0.00429203	0.251368	0.464834			0.0926152	0.353782		0.0282201	0.184236	0.423136		0.00500233	0.284284	0.504946			0.0927665	0.34473
	incidence											1.03323	1.028											1.03532	1.0291											1.03701	1.02984			1.08403								1.03844	1.03081
	loglik
Ccr	inters
	incidence
	loglik
Mca	inters	3.17431	3.98082	5.23534	6.51128	3.11494	4.20688	5.21827	6.51128	3.07152	3.89001	4.91503	5.77267	2.81085	3.50153	4.48673	5.47994	2.82368	3.74787	4.60691	5.60891	2.79137	3.46455	4.2881	5.10764	2.81577	3.45098	4.40822	5.36532	2.76703	3.65958	4.48062	5.42652	2.78586	3.39696	4.23852	4.96657	2.78627	3.43994	4.3739	5.25547	2.71039	3.58531	4.31932	5.25547	2.72538	3.32905	4.09944	4.78036
	incidence									1.01421
	loglik
Mav	inters
	incidence
	loglik
Dni	inters	1.70792	2.28866	2.97267	3.99495	1.6747	1.96234	2.65342	3.70324	1.70314	2.19378	2.82031	3.76004	1.64789	2.22613	2.94809	4.05874	1.59297	1.91713	2.61612	3.79327	1.65733	2.11646	2.77566	3.81744	1.6079	2.18425	2.9081	4.03747	1.54274	1.88103	2.57268	3.74048	1.6288	2.09839	2.73458	3.74494	1.57409	2.15132	2.87876	3.91847	1.5173	1.85212	2.53925	3.66018	1.61981	2.10223	2.70934	3.72506
	incidence	0.958397	0.96647	0.976032	0.977186	0.955058	0.976943	0.977704	0.97479	0.982636	0.99305	0.990329	0.990543	0.970572	0.974785	0.980519	0.978464	0.972008	0.983817	0.983023	0.97915	0.987148		0.993304	0.992067	0.976909	0.97942	0.983514	0.979665	0.97963	0.987099	0.986242	0.982166	0.989626			0.993218	0.981431	0.982639	0.985522	0.981735	0.982898	0.989472	0.988485	0.984413	0.990361			0.993812
	loglik
Sbe	inters
	incidence
	loglik
Hcr	inters	2.46191	2.97647	3.4106	4.15838	2.47427	2.92324	3.37619	4.14346	2.497	2.99621	3.49828	4.07438	2.45627	2.95004	3.3655	4.13285	2.46885	2.9085	3.36306	4.15002	2.48757	2.96893	3.43281	4.10465	2.41734	2.87263	3.3106	4.05477	2.42793	2.83333	3.24948	4.03149	2.46459	2.91291	3.38629	3.98376	2.38502	2.8421	3.20848	3.85215	2.39578	2.78126	3.17813	3.77485	2.40301	2.85857	3.36392	3.90632
	incidence				1.00586				1.00635													0.993126				0.992001				0.992334				0.992129				0.992145				0.992444				0.990821	0.993258	0.991825
	loglik
Cau	inters
	incidence
	loglik
Clu	inters	4.97369	5.54577	6.32744	7.71583	4.03491	4.90744	5.08305	5.67931	2.90401	3.48867	4.68756	5.59474	4.56604	4.9925	5.65512	6.70894	3.71682	4.45738	4.74615	5.26126	2.76226	3.29693	4.36451	5.10981	4.3196	4.77634	5.41562	6.32535	3.68655	4.36877	4.59641	5.02652	2.72852	3.25895	4.24294	4.98638	4.2274	4.89012	6.00539	7.9293	3.55427	4.13176	4.37898	4.80685	2.669	3.19276	4.14199	4.87268
	incidence	1.01859	1.02092	1.01903	1.02075	1.02108	1.01992	1.02764	1.0267	1.02319	1.01843			1.0156	1.01726	1.02077	1.02409	1.02148	1.02247	1.02744	1.02702	1.02461	1.01993	1.01373	1.01345			1.01629	1.01726	1.01859	1.02005	1.02212	1.02273	1.02371	1.01907	1.01337	1.01518				0.977383	1.01827	1.01693	1.01689	1.01397	1.023	1.01831	1.01193
	loglik
Ala	inters	10.5245	12.0246	12.8641	12.6915	7.64896	8.26714	8.07433	8.65881	8.30332	8.87281	8.56559	9.24847	9.58472	11.7263	13.2161	14.7009	8.45594	7.89975	7.89363	8.5203	9.28794	9.32101	9.77705	9.9626	8.38381	16.5924	20.9247	20.6591	17.0699	21.3185	18.3317	15.6706	17.117	20.6215	18.2901	18.9686	14.0355	29.5	26.5	22	27.2879	24.5919	21	17.8333	15.6917	16.7614	19.9246	19.6098
	incidence	1.00914	1.01092	1.0104	1.01064	1.01008	1.01047	1.01501	1.01539	1.01027	1.01032	1.01218	1.01192	1.01217	1.01319	1.01181	1.0108	1.01044	1.01252	1.01682	1.0171	1.01061	1.01178	1.01283	1.01326	1.01523	1.01226	1.0101	1.01053	1.00425	1.00399	1.01377	1.0165	1.00517	1.00455	1.00685	1.00735	1.01425	1.01829	1.01972	1.02204	1.00373	1.00585	1.01977	1.02296	1.00407	1.00671	1.00545	1.00774
	loglik
Uar	inters		0.10703	0.320026	0.627092			0.134584	0.388784			0.0534671	0.211157		0.100331	0.351791	0.615216			0.14583	0.397168			0.0576575	0.229764		0.103987	0.355161	0.600302			0.142482	0.362991			0.0500667	0.220944		0.107957	0.37661	0.590157			0.154819	0.363697			0.0460444	0.206393
	incidence												1.04172				1.00972								1.03945				1.01038								1.04131				1.0102							1.03367	1.04374
	loglik
Mlu	inters	5.85242	6.52762	6.63495	7.74402	7.56809	8.62596	9.30895	9.9736	4.21046	4.83696	5.28682	6.04734	4.84995	5.41675	5.86758	7.17635	6.57831	7.56948	8.18823	9.05258	3.63415	4.13999	4.55081	4.8887	4.84796	4.98733	5.45622	6.81205	6.59062	7.46445	8.17641	9.58833	3.31712	3.83133	4.48071	4.7715	4.40644	4.26136	4.33405	4.8771	5.6065	6.10003	6.83129	8.03214	3.07235	3.55107	4.0672	4.14708
	incidence																	1.02066	1.0246	1.02022	1.0173				1.01404	1.02168	1.02737	1.03009	1.02861	1.01658	1.0187	1.01711	1.01541	1.02794	1.02882	1.02599	1.03139	1.0335	1.04219	1.0469	1.04942	1.02606	1.02651	1.02425	1.02015	1.03946	1.04063	1.04057	1.04893
	loglik
Mpu	inters
	incidence
	loglik
Mma	inters
	incidence
	loglik
Ggu	inters	11.2162	11.1774	10.416	11.2924	9.73512	10.4084	11.6252	12.5602	7.21858	8.74728	8.35346	9.85743	13.2313	13.6656	12.7431	12.2689	12.7861	13.9698	14.3507	14.6357	9.24574	11.236	11.5014	11.7604	23.7219	23.399	22.4339	23.5912	18.6252	21.6021	22.7269	23.4481	11.5723	13.4005	14.9905	19.1121	36.0606	42.2113	50.8216	61.098	25.9926	34.236	41.3919	43.0955	11.7561	13.6562	16.8139	23.9071
	incidence	0.997437						0.99725	0.995611					0.996053	0.996379						0.996521					0.993232	0.994523	0.995552	0.995467	0.995562	0.99462	0.993574	0.991246				0.994531	0.98361	0.984135	0.983267	0.977822	0.991755	0.987913	0.98625	0.983792	1.00259			0.992539
	loglik
Llu	inters		1.29584	1.54861	2.01895		1.21945	1.45011	1.91274		1.25005	1.46989	1.96395		1.30614	1.56843	2.04318		1.2214	1.46894	1.95093		1.24189	1.48098	1.98952		1.31048	1.55283	2.02276		1.22413	1.45838	1.92075		1.24621	1.47988	1.97565		1.31277	1.5399	2.00685		1.23825	1.47458	1.93589		1.26187	1.47078	1.966
	incidence	0.975435	0.978452	0.973701	0.96651	0.959164	0.974294	0.974553	0.970806	0.962087	0.97408	0.974924	0.966066	0.977904	0.97803	0.974115	0.967213	0.966703		0.974962	0.9711	0.968913	0.977369	0.974551	0.966194	0.976189	0.976449	0.975676	0.969058	0.963771	0.975993	0.975111	0.972123	0.965701	0.975647	0.974925	0.966374	0.970294	0.975597	0.974371	0.967875	0.964624	0.969829	0.969281	0.967583	0.965692	0.968998	0.974621	0.965463
	loglik
Fsi	inters		2.04998	3.79286	6.16513	1.73383	2.3002	2.61536	3.68705	1.8705	2.64814	3.29419	3.6651	1.22618	1.9941	3.83106	5.90082	1.67915	2.06012	2.29937	3.37371	1.92671	2.56487	3.11646	3.54218	1.35273	2.23166	4.03255	6.81212	1.84556	2.44992	2.59989	3.6692	2.10754	2.67879	3.31049	3.7065	1.69388	2.76217	5.57393	10.6717	2.12796	2.93809	3.49503	5.07337	2.19091	2.85751	3.39737	4.06112
	incidence	1.02646	1.01819	1.0085		1.01263	1.01129	1.01181	1.00792	1.01723	1.01266	1.0096	1.00859	1.01909	1.01439	1.00541		1.01427	1.01522	1.01637	1.01233	1.01487	1.01147	1.00974	1.0086	1.01687	1.01399	1.00772		1.01002	1.01042	1.01231	1.01003	1.00874	1.00611			1.01246	1.01143	1.0064		1.00954	1.00949	1.00948	1.00928	1.00937	1.00783	1.0073	1.00729
	loglik
Lly	inters
	incidence
	loglik
Lpa	inters	16.1308	16.672	18.4404	19.8766	15.5409	17.1044	19.1252	21.5321	13.8395	15.521	16.4861	17.6287	19.9891	22.7194	23.7619		19.9226	26.2632			16.6745	22.5909	24.95	26.2632					25.8916	29.3529			22.7202	35.5714							19.689	19.96			17.1738	19.9885	21.7295	23.2381
	incidence	0.967794	0.967116	0.631754	0.639232	0.982699	0.629995	0.575505	0.643016	0.980023	0.634485	0.715174	0.735865					0.971151				0.96638	3.42446e-12							3.36531e-222					7.65792e-18							6.169e-218				0.972968			0.000227795
	loglik
Hic	inters	6.98257	7.4099	8.14289	8.77319	6.32687	7.16687	7.61362	9.35635	6.54183	7.22366	7.47787	8.3433	7.31465	7.80932	8.67679	9.7924	7.13732	7.95527	8.20045	10.0231	7.1486	7.81645	8.30753	9.20989	7.45372	8.50998	9.33027	12.3957	7.42287	8.01711	9.43985	12.6332	6.99451	7.76745	9.41681	12.6019	7.3917	7.98207	9.1062	10.7887	7.12421	7.5983	8.58195	10.3455	6.73959	7.24787	8.51415	9.56479
	incidence		1.05242	1.05734	1.06163										1.04993	1.05338	1.05178										1.04179	1.0474	1.04035		1.03014	1.02641	1.02387		1.03013	1.0291	1.0247		1.03291	1.03532	1.03188		1.02444	1.01852	1.0209
	loglik
Gge	inters	10.8596	11.6159	12.7061	14.8632	10.2144	10.9816	11.9551	13.5304	8.9758	10.0813	11.7498	12.7801	10.5908	11.2442	12.3364	14.367	9.97028	10.7334	11.6397	12.9925	8.63446	9.68516	11.1976	12.7955	9.13003	9.34185	10.5941	12.7692	8.79856	9.22042	10.1041	11.0443	8.02552	8.93657	9.98167	11.2707	8.86688	9.03945	10.1163	12.1314	8.32881	8.84924	9.48517	10.4994	7.36827	7.99582	8.99535	10.0348
	incidence	0.501835	0.289016	0.169676	0.0139961	0.479841	0.387593	0.247956	0.0340747	0.469647	0.400224	0.200462	0.177369	0.541114	0.374528	0.19769	0.0202216	0.525676	0.39868	0.272208	0.0804471	0.51038	0.4055	0.216063	0.168673	0.642137	0.586119	0.317042	0.0403591		0.542638	0.37607	0.203369		0.476312	0.294522	0.168613	0.78062	0.765539	0.34256	0.0347457	0.699491	0.578431	0.424539	0.208896	0.645621	0.548332	0.36961	0.243898
	loglik
Rru	inters	8.17588	10.7421	14.6631	18.5226	8.02491	12.5204	14.7085	16.3322	7.66782	9.30995	12.4158	15.443	8.47715	11.5411	15.7042	20.3655	8.57815	12.8031	14.7797	17.6688	7.81556	9.48976	12.6353	17.2101	8.97513	11.1814	14.7277	19.6569	8.28307	12.1848	14.7218	17.7435	7.93701	9.67633	13.3049	17.149	8.31625	10.6636	15.0575	18.5677	8.09606	11.872	14.7181	17.0817	7.66182	9.27672	12.0433	16.0248
	incidence	0.95677	0.934854	0.902031	0.797351	0.946276	0.897619	0.802405	0.763567	0.967532	0.955064	0.878822	0.74784	0.955071	0.930156	0.891369	0.730178	0.945189	0.902672	0.785839	0.726761	0.965573	0.954951	0.892352	0.712533	0.950671	0.939234	0.903834	0.462792	0.947567	0.907882	0.730005	0.638522	0.965797	0.954861	0.893155	0.722943	0.953212	0.945434	0.916328	0.579421	0.954014	0.914517	0.771797	0.600985	0.968413	0.958757	0.902847	0.659672
	loglik
Cib	inters	9.55557	11.0256	13.0101	16.1799	8.87864	9.85564	10.7126	13.4734	9.17843	10.2014	10.8789	12.0382	11.4654	13.3466	15.0249	16.8768	9.68794	10.3568	11.3005	13.4541	10.3163	11.3026	12.0949	13.6009	14.5261	15.3319	18.8383	23.4758	11.9181	12.8858	13.8905	16.9598	10.4915	12.2343	13.4411	16.17	16.5278	19.4829	22.7887	25.9345	12.9919	15.2779	16.0494	18.7664	9.88138	11.4053	12.4134	15.0338
	incidence	0.989357	0.989171	0.988482	0.980941			0.995538		0.99282	0.99042	0.987775	0.993675	0.983393	0.982831	0.983392	0.983508		0.995813			0.992601	0.990297	0.987705	0.993847	0.970339	0.965486	0.950283	0.92389	0.986209	0.984681	0.983223	0.983472	0.988701	0.984055	0.983534	0.986141	0.971369	0.95785	0.941692	0.937073	0.982985	0.979178	0.976971	0.979146	0.989462	0.986792	0.986997	0.991108
	loglik
Cpy	inters	23.1015	25.94	26.0886	29.3593	19.8158	21.8893	26.0624	26.2099	14.6583	18.2506	25.8616	29.5535	15.0738	18.5111	19.3292	20.5237	13.1703	15.1903	17.5738	20.1304	10.8091	13.4252	17.7173	18.5756	15.4352	20.2222	25.0475	28.8497	13.4491	15.4121	16.7411	19.1841	10.5892	12.2625	15.3313	17.1897	13.3986	17.5259	20.433	22.7681	10.7636	12.6807	15.6901	19.1557	8.79683	9.65631	11.2562	12.5006
	incidence	0.982153	0.976016	0.974041	0.981009		0.985186	0.974392	0.972389			0.977038	0.969019	1.02935	1.01536			1.03752	1.02664		0.98502				0.9862	1.03175				1.01158		1.02644	1.05699	1.02676	1.02939	1.01925	1.01387	1.04085	1.02193	1.02629	1.01834	1.02158	1.01371	1.04405	1.03569	1.04031	1.0351	1.02799	1.02826
	loglik
Oam	inters	5.28532	5.41733	5.89921	6.43607	5.20067	5.4082	6.65626	8.08292	5.19479	5.99349	7.16299	9.64028	6.76829	7.41556	8.66603	10.6122	6.20732	6.80337	9.74382	11.9132	6.84677	8.67703	9.43806	11.3957	5.61674	6.61491	8.17669	11.4445	5.33224	6.74169	9.33565	11.3805	7.02154	8.97012	9.67808	11.5881	6.12399	8.67778	11.5715	14.6192	5.84896	8.0427	11.9431	18.4018	6.25596	8.5307	8.48371	10.0516
	incidence				1.04009			1.03467	1.03961													0.984669					0.992663	0.989971	0.991296		0.986225	0.986126		0.981871	0.980195	0.986657	0.987107	1.00601			0.992808			0.993257	0.982988		0.990961	0.994047	0.993112
	loglik
#	INTERS	17	21	21	21	18	20	21	21	17	18	20	20	18	21	21	20	18	20	20	20	17	18	20	20	17	20	20	20	18	20	20	20	17	18	19	19	17	20	20	20	18	20	20	20	17	18	20	20
#	INCID	11	11	11	12	8	9	12	12	10	9	10	11	11	13	11	11	11	9	8	11	12	9	10	13	13	13	14	14	13	13	14	13	13	13	12	15	14	13	14	15	14	13	14	14	15	13	15	16
MED	INTERS	7.43455	6.83888	7.60698	8.80411	6.48396	6.745	7.24425	8.20271	5.94464	6.61903	6.95891	8.02975	7.01964	7.00787	7.84191	8.17539	6.63612	7.04781	6.42949	7.46827	6.18644	7.04907	7.29153	8.22953	6.87045	6.98422	8.229	9.83463	7.7937	8.28266	7.41265	8.41898	7.09156	8.46333	6.97087	8.28277	7.88411	8.67415	10.0909	11.7443	8.25666	8.53776	8.54418	9.72879	6.41009	7.06008	7.37319	8.62277
MED	INCID	0.943942	0.927596	0.882818	0.874599	0.920853	0.877035	0.886203	0.870852	0.941965	0.887638	0.877954	0.879145	0.955265	0.947762	0.916838	0.886046	0.953719	0.931382	0.88711	0.892503	0.952184	0.819629	0.914212	0.918778	0.966521	0.961454	0.941998	0.887286	0.918022	0.959104	0.939592	0.917054	0.999485	0.884304	0.939377	0.932751	0.979346	0.976818	0.950734	0.900684	0.90411	0.963352	0.946557	0.917034	0.977457	0.967134	0.960304	0.876632
		BASELINE	2020	2050	2080
MEDIAN
#	INTERS	20	20	19.5	20
#	INCID	11	11	13	14
1ST QUARTILE
#	INTERS	18	18	18	18
#	INCID	9.75	9.75	13	13.75
3RD QUARTILE
#	INTERS	21	20	20	20
#	INCID	11.25	11.25	14	15
INTERQUARTILE RANGE X 1.5
#	INTERS	4.5	3	3	3
#	INCID	2.25	2.25	1.5	1.875
		BASELINE	2020	2050	2080
AVERAGE
MED	INTERS	7.24273	7.19859	7.88623	8.57725
MED	INCID	0.89755	0.914619	0.937246	0.943347
SD
MED	INTERS	0.814052	0.643712	0.873482	1.43631
MED	INCID	0.0276306	0.0394038	0.0329234	0.0349039

## Sheet: N2K
		Baseline												2020												2050												2080
		RCP 8.5				RACP 6.0				RCP 4.5				RCP 8.5				RACP 6.0				RCP 4.5				RCP 8.5				RACP 6.0				RCP 4.5				RCP 8.5				RACP 6.0				RCP 4.5
Aal	inters	2.02624	2.02291	1.99942	1.9703	2.06312	1.99175	1.80027	1.88488	1.94437	1.81862	1.64984	1.64913	1.9895	1.88143	1.723	1.63825	1.98835	1.82969	1.61259	1.57351	1.95221	1.82715	1.68445	1.5179	1.73428	1.50571	1.37933	1.14769	1.72832	1.5295	1.24333	1.0073	1.83629	1.67925	1.46371	1.13002	1.30045	1.17143	1.07812	0.958648	1.30103	1.12705	0.927941	0.77886	1.3596	1.17599	0.997309	0.717846
	incidence	0.999374	0.999422	0.999762	1.00018	0.999633	1.00065	1.00335	1.00216	1.00075	1.00255	1.00498	1.00499	0.999515	1.0011	1.00342	1.00467	1.0005	1.00276	1.00572	1.00628	0.999669	1.00155	1.00402	1.00663	1.00342	1.00678	1.0087	1.01238	1.00405	1.00695	1.0114	1.01523	1.00104	1.00357	1.00697	1.01249	1.00977	1.01199	1.01344	1.01556	1.01003	1.01309	1.01658	1.01951	1.00748	1.01112	1.01435	1.01986
	loglik	-740.191	-753.682	-775.697	-799.943	-743.725	-774.133	-790.29	-816.326	-737.527	-772.613	-805.347	-829.689	-667.435	-663.644	-669.434	-678.915	-671.52	-688.464	-693.428	-706.336	-691.062	-722.596	-732.014	-731.92	-684.41	-698.424	-722.888	-741.033	-679.182	-708.156	-722.896	-739.951	-668.196	-704.346	-744.415	-761.89	-664.731	-686.25	-697.624	-701.647	-651.094	-676.344	-675.566	-695.898	-608.373	-628.306	-641.255	-654.264
Gpy	inters	1.32718	1.67414	1.97491	2.25826	1.47074	1.87128	2.18224	2.68854	1.20672	1.64757	2.15276	2.48257	1.24083	1.57952	1.7892	2.10664	1.34868	1.75357	1.95341	2.45435	1.12101	1.55708	1.97469	2.41436	1.1036	1.43566	1.60663	1.88101	1.20825	1.6054	1.76081	2.33267	1.04531	1.45601	1.82396	2.2166	1.01505	1.33718	1.48284	1.75576	1.09387	1.48864	1.58967	2.11064	1.00898	1.39211	1.73225	2.11103
	incidence	1.00065	1.00062	1.00094	1.00269	0.999489	0.999303	0.999828	1.0006	1.00152	1.00048	0.999822	1.00244	1.0031	1.0027	1.00433	1.00565	1.00212	1.0015	1.00334	1.00372	1.00397	1.00252	1.00333	1.00499	1.00601	1.0052	1.00774	1.00892	1.00503	1.00392	1.00666	1.00634	1.00587	1.00446	1.00615	1.00794	1.00798	1.00687	1.00954	1.01044	1.00736	1.00578	1.00892	1.00842	1.00677	1.00547	1.00728	1.00894
	loglik	-390.35	-388.281	-409.751	-393.048	-393.163	-386.302	-404.334	-374.531	-397.72	-401.495	-411.149	-391.667	-395.619	-396.785	-417.663	-399.848	-396.068	-394.954	-414.53	-387.88	-403.308	-405.988	-422.21	-394.982	-402.283	-404.642	-425.101	-406.95	-401.377	-401.476	-424.712	-396.226	-407.09	-413.989	-430.942	-403.913	-406.378	-409.376	-433.659	-417.504	-411.594	-408.715	-439.322	-412.445	-411.968	-418.881	-438.084	-410.492
Lti	inters	7.83202e-10	7.83202e-10	7.83202e-10	7.83202e-10	2.70099e-11	2.70099e-11	2.70099e-11	2.70099e-11	2.43509e-12	2.43509e-12	2.43509e-12	2.43509e-12	7.83202e-10	7.83202e-10	7.83202e-10	7.83202e-10	2.70099e-11	2.70099e-11	2.70099e-11	2.70099e-11	2.43509e-12	2.43509e-12	2.43509e-12	2.43509e-12	7.83202e-10	7.83202e-10	7.83202e-10	7.83202e-10	2.70099e-11	2.70099e-11	2.70099e-11	2.70099e-11	2.43509e-12	2.43509e-12	2.43509e-12	2.43509e-12	7.83202e-10	7.83202e-10	7.83202e-10	7.83202e-10	2.70099e-11	2.70099e-11	2.70099e-11	2.70099e-11	2.43509e-12	2.43509e-12	2.43509e-12	2.43509e-12
	incidence	1	1	1	1	1	1	1	1	1	1	1	1	1	1	1	1	1	1	1	1	1	1	1	1	1	1	1	1	1	1	1	1	1	1	1	1	1	1	1	1	1	1	1	1	1	1	1	1
	loglik	-6.42276e-06	-6.42276e-06	-6.42276e-06	-6.42276e-06	-2.67884e-05	-2.67884e-05	-2.67884e-05	-2.67884e-05	0.0060073	0.0060073	0.0060073	0.0060073	-6.42276e-06	-6.42276e-06	-6.42276e-06	-6.42276e-06	-2.67884e-05	-2.67884e-05	-2.67884e-05	-2.67884e-05	0.0060073	0.0060073	0.0060073	0.0060073	-6.42276e-06	-6.42276e-06	-6.42276e-06	-6.42276e-06	-2.67884e-05	-2.67884e-05	-2.67884e-05	-2.67884e-05	0.0060073	0.0060073	0.0060073	0.0060073	-6.42276e-06	-6.42276e-06	-6.42276e-06	-6.42276e-06	-2.67884e-05	-2.67884e-05	-2.67884e-05	-2.67884e-05	0.0060073	0.0060073	0.0060073	0.0060073
Sci	inters	1.2105e-10	1.2105e-10	1.2105e-10	1.2105e-10	2.12397e-10	2.12397e-10	2.12397e-10	2.12397e-10	7.03535e-09	7.03535e-09	7.03535e-09	7.03535e-09	1.2105e-10	1.2105e-10	1.2105e-10	1.2105e-10	2.12397e-10	2.12397e-10	2.12397e-10	2.12397e-10	7.03535e-09	7.03535e-09	7.03535e-09	7.03535e-09	1.2105e-10	1.2105e-10	1.2105e-10	1.2105e-10	2.12397e-10	2.12397e-10	2.12397e-10	2.12397e-10	7.03535e-09	7.03535e-09	7.03535e-09	7.03535e-09	1.2105e-10	1.2105e-10	1.2105e-10	1.2105e-10	2.12397e-10	2.12397e-10	2.12397e-10	2.12397e-10	7.03535e-09	7.03535e-09	7.03535e-09	7.03535e-09
	incidence	1	1	1	1	1	1	1	1	1	1	1	1	1	1	1	1	1	1	1	1	1	1	1	1	1	1	1	1	1	1	1	1	1	1	1	1	1	1	1	1	1	1	1	1	1	1	1	1
	loglik	4.15793e-05	4.15793e-05	4.15793e-05	4.15793e-05	-1.45223e-05	-1.45223e-05	-1.45223e-05	-1.45223e-05	-2.68045e-07	-2.68045e-07	-2.68045e-07	-2.68045e-07	4.15793e-05	4.15793e-05	4.15793e-05	4.15793e-05	-1.45223e-05	-1.45223e-05	-1.45223e-05	-1.45223e-05	-2.68045e-07	-2.68045e-07	-2.68045e-07	-2.68045e-07	4.15793e-05	4.15793e-05	4.15793e-05	4.15793e-05	-1.45223e-05	-1.45223e-05	-1.45223e-05	-1.45223e-05	-2.68045e-07	-2.68045e-07	-2.68045e-07	-2.68045e-07	4.15793e-05	4.15793e-05	4.15793e-05	4.15793e-05	-1.45223e-05	-1.45223e-05	-1.45223e-05	-1.45223e-05	-2.68045e-07	-2.68045e-07	-2.68045e-07	-2.68045e-07
Pvo	inters	3.30547	3.30514	3.27087	3.30646	1.44795	1.46271	1.48284	1.45953	1.95314e-12	1.95314e-12	1.95314e-12	1.95314e-12	3.25028	3.23537	3.21624	3.25487	1.42019	1.43692	1.45084	1.43408	1.95314e-12	1.95314e-12	1.95314e-12	1.95314e-12	3.20406	3.17802	3.14763	3.21322	1.40532	1.40429	1.41899	1.41979	1.95314e-12	1.95314e-12	1.95314e-12	1.95314e-12	3.22909	3.23335	3.21907	3.28951	1.39003	1.39408	1.4077	1.41244	1.95314e-12	1.95314e-12	1.95314e-12	1.95314e-12
	incidence	0.976185	0.972451	0.971461	0.971125	0.94464	0.94508	0.945595	0.959466	0.999993	0.999993	0.999993	0.999993	0.975029	0.972928	0.970185	0.969387	0.957785	0.957365	0.957196	0.96964	0.999993	0.999993	0.999993	0.999993	0.970985	0.970196	0.96758	0.96461	0.969766	0.970065	0.969641	0.975642	0.999993	0.999993	0.999993	0.999993	0.974873	0.973283	0.971321	0.968279	0.979918	0.978898	0.97876	0.981199	0.999993	0.999993	0.999993	0.999993
	loglik	-269.347	-268.251	-269.344	-264.689	-297.589	-299.748	-299.214	-305.183	0.00442958	0.00442958	0.00442958	0.00442958	-261.366	-260.747	-261.836	-258.006	-287.993	-290.006	-290.798	-297.197	0.00442958	0.00442958	0.00442958	0.00442958	-257.637	-258.556	-259.505	-256.295	-286.393	-287.549	-287.632	-292.02	0.00442958	0.00442958	0.00442958	0.00442958	-261.372	-259.927	-258.967	-256.169	-300.992	-302.02	-301.615	-303.254	0.00442958	0.00442958	0.00442958	0.00442958
Cfi	inters	3.8798e-12	0.0672454	0.230807	0.509444	9.52131e-10	0.00415915	0.256329	0.516938	1.27026e-11	1.27026e-11	0.0919575	0.369647	3.8798e-12	0.0450823	0.208636	0.491233	9.52131e-10	0.00415915	0.260833	0.519031	1.27026e-11	1.27026e-11	0.0906132	0.349841	3.8798e-12	0.0342986	0.20476	0.468914	9.52131e-10	0.00415915	0.273066	0.521565	1.27026e-11	1.27026e-11	0.0895264	0.3462	3.8798e-12	0.025505	0.192218	0.443383	9.52131e-10	0.00523767	0.299019	0.5559	1.27026e-11	1.27026e-11	0.0888848	0.335999
	incidence	1	0.240676	0.877611	0.952869	1	1.03108	0.935609	0.904093	1	1	1.0263	1.0206	1	0.880503	0.946923	0.975827	1	1.03108	0.938689	0.911533	1	1	1.02919	1.02282	1	0.993169	0.99332	0.996199	1	1.03108	0.934628	0.927943	1	1	1.03145	1.02347	1	1.05509	1.03524	1.00731	1	0.941392	0.904519	0.918762	1	1	1.03319	1.02454
	loglik	0.00199007	-42.5534	-135.254	-238.144	4.6899e-06	-6.91571	-154.075	-227.673	0.000644636	0.000644636	-96.9572	-233.193	0.00199007	-40.3178	-132.862	-237.863	4.6899e-06	-6.91571	-152.185	-225.038	0.000644636	0.000644636	-94.4615	-225.483	0.00199007	-36.3369	-138.158	-237.611	4.6899e-06	-6.91571	-158.331	-230.826	0.000644636	0.000644636	-95.7919	-224.292	0.00199007	-33.3552	-144.717	-237.296	4.6899e-06	-7.01524	-169.327	-247.126	0.000644636	0.000644636	-99.8522	-222.914
Ccr	inters	3.61388e-10	3.61388e-10	3.61388e-10	3.61388e-10	3.56427e-11	3.56427e-11	3.56427e-11	3.56427e-11	1.33709e-11	1.33709e-11	1.33709e-11	1.33709e-11	3.61388e-10	3.61388e-10	3.61388e-10	3.61388e-10	3.56427e-11	3.56427e-11	3.56427e-11	3.56427e-11	1.33709e-11	1.33709e-11	1.33709e-11	1.33709e-11	3.61388e-10	3.61388e-10	3.61388e-10	3.61388e-10	3.56427e-11	3.56427e-11	3.56427e-11	3.56427e-11	1.33709e-11	1.33709e-11	1.33709e-11	1.33709e-11	3.61388e-10	3.61388e-10	3.61388e-10	3.61388e-10	3.56427e-11	3.56427e-11	3.56427e-11	3.56427e-11	1.33709e-11	1.33709e-11	1.33709e-11	1.33709e-11
	incidence	1	1	1	1	1	1	1	1	1	1	1	1	1	1	1	1	1	1	1	1	1	1	1	1	1	1	1	1	1	1	1	1	1	1	1	1	1	1	1	1	1	1	1	1	1	1	1	1
	loglik	3.40498e-05	3.40498e-05	3.40498e-05	3.40498e-05	0.00040543	0.00040543	0.00040543	0.00040543	0.000760344	0.000760344	0.000760344	0.000760344	3.40498e-05	3.40498e-05	3.40498e-05	3.40498e-05	0.00040543	0.00040543	0.00040543	0.00040543	0.000760344	0.000760344	0.000760344	0.000760344	3.40498e-05	3.40498e-05	3.40498e-05	3.40498e-05	0.00040543	0.00040543	0.00040543	0.00040543	0.000760344	0.000760344	0.000760344	0.000760344	3.40498e-05	3.40498e-05	3.40498e-05	3.40498e-05	0.00040543	0.00040543	0.00040543	0.00040543	0.000760344	0.000760344	0.000760344	0.000760344
Mca	inters	2.15713	2.61086	3.29051	3.98761	2.20404	2.69873	3.291	3.97379	2.11252	2.56258	2.97618	3.40222	1.85492	2.22961	2.7115	3.19235	1.97698	2.38893	2.89487	3.36687	1.88529	2.26323	2.58297	2.89349	1.97461	2.36684	2.87815	3.37556	2.0424	2.50291	3.05561	3.56081	1.98092	2.36574	2.7877	3.11397	2.07751	2.52984	3.05015	3.57195	2.14047	2.66358	3.14766	3.63523	2.07498	2.49224	2.85545	3.28274
	incidence	1.01084	1.012	1.01264	1.01255	1.01025	1.01239	1.01215	1.01263	1.01118	1.01198	1.01376	1.01345	1.01184	1.01301	1.014	1.01421	1.01068	1.01284	1.01258	1.01346	1.01173	1.01241	1.01424	1.01451	1.01039	1.01137	1.01238	1.01272	1.00949	1.01131	1.01085	1.01169	1.01045	1.01095	1.01226	1.01256	1.00878	1.0095	1.01084	1.01107	1.00735	1.00901	1.00912	1.01066	1.00844	1.00901	1.01084	1.0106
	loglik	-456.618	-439.227	-411.474	-386.574	-465.667	-435.478	-413.349	-392.877	-453.022	-433.41	-409.47	-424.094	-466.511	-457.56	-442.188	-426.329	-475.077	-455.09	-439.861	-431.959	-462.689	-449.335	-435.188	-443.819	-443.957	-429.364	-403.393	-379.413	-454.534	-434.921	-412.546	-399.243	-442.93	-427.31	-409.802	-419.752	-431.537	-410.588	-367.436	-341.303	-443.836	-416.306	-385.708	-353.68	-432.28	-415.53	-389.898	-397.079
Mav	inters	9.26184e-12	9.26184e-12	9.26184e-12	9.26184e-12	1.25905e-12	1.25905e-12	1.25905e-12	1.25905e-12	7.48909e-09	7.48909e-09	7.48909e-09	7.48909e-09	9.26184e-12	9.26184e-12	9.26184e-12	9.26184e-12	1.25905e-12	1.25905e-12	1.25905e-12	1.25905e-12	7.48909e-09	7.48909e-09	7.48909e-09	7.48909e-09	9.26184e-12	9.26184e-12	9.26184e-12	9.26184e-12	1.25905e-12	1.25905e-12	1.25905e-12	1.25905e-12	7.48909e-09	7.48909e-09	7.48909e-09	7.48909e-09	9.26184e-12	9.26184e-12	9.26184e-12	9.26184e-12	1.25905e-12	1.25905e-12	1.25905e-12	1.25905e-12	7.48909e-09	7.48909e-09	7.48909e-09	7.48909e-09
	incidence	1	1	1	1	1	1	1	1	1	1	1	1	1	1	1	1	1	1	1	1	1	1	1	1	1	1	1	1	1	1	1	1	1	1	1	1	1	1	1	1	1	1	1	1	1	1	1	1
	loglik	0.00162731	0.00162731	0.00162731	0.00162731	0.00956683	0.00956683	0.00956683	0.00956683	-3.14639e-06	-3.14639e-06	-3.14639e-06	-3.14639e-06	0.00162731	0.00162731	0.00162731	0.00162731	0.00956683	0.00956683	0.00956683	0.00956683	-3.14639e-06	-3.14639e-06	-3.14639e-06	-3.14639e-06	0.00162731	0.00162731	0.00162731	0.00162731	0.00956683	0.00956683	0.00956683	0.00956683	-3.14639e-06	-3.14639e-06	-3.14639e-06	-3.14639e-06	0.00162731	0.00162731	0.00162731	0.00162731	0.00956683	0.00956683	0.00956683	0.00956683	-3.14639e-06	-3.14639e-06	-3.14639e-06	-3.14639e-06
Dni	inters	1.84589	2.51531	3.29886	4.33152	1.70082	2.0699	2.90998	3.83046	1.71659	2.22613	2.83345	3.66921	1.79592	2.42777	3.23549	4.35022	1.64383	2.01036	2.85232	3.92884	1.64567	2.15645	2.79871	3.76826	1.77302	2.39358	3.17223	4.29342	1.62436	1.97339	2.79826	3.86803	1.63093	2.16417	2.80633	3.74658	1.76794	2.39338	3.15908	4.20862	1.62411	1.9715	2.80175	3.83622	1.65009	2.20457	2.83117	3.80693
	incidence	0.980878	0.981482	0.981799	0.981793	0.985275	0.987693	0.98467	0.986003	0.992564	0.995684	0.99455	0.996252	0.983405	0.984717	0.984778	0.983781	0.98792	0.990486	0.987235	0.987582	0.994903	0.997426	0.995805	0.996276	0.984502	0.985904	0.986581	0.9851	0.988778	0.991705	0.988738	0.988925	0.995368	0.997238	0.995644	0.996074	0.984741	0.985911	0.986944	0.985458	0.988789	0.991766	0.988643	0.98873	0.994762	0.996233	0.995113	0.995099
	loglik	-296.573	-323.942	-336.514	-331.837	-297.206	-325.274	-338.666	-340.391	-318.395	-341.948	-358.548	-358.916	-298.977	-326.592	-340.264	-336.154	-301.418	-327.036	-342.483	-335.038	-323.457	-345.34	-360.201	-358.12	-301.068	-326.381	-341.096	-338.808	-300.925	-327.92	-343.066	-337.708	-321.131	-341.852	-356.013	-354.988	-298.07	-322.434	-335.948	-335.806	-298.841	-324.118	-336.316	-331.107	-315.714	-333.278	-348.852	-349.77
Sbe	inters	6.45409e-11	6.45409e-11	6.45409e-11	6.45409e-11	2.12449e-10	2.12449e-10	2.12449e-10	2.12449e-10	4.201e-09	4.201e-09	4.201e-09	4.201e-09	6.45409e-11	6.45409e-11	6.45409e-11	6.45409e-11	2.12449e-10	2.12449e-10	2.12449e-10	2.12449e-10	4.201e-09	4.201e-09	4.201e-09	4.201e-09	6.45409e-11	6.45409e-11	6.45409e-11	6.45409e-11	2.12449e-10	2.12449e-10	2.12449e-10	2.12449e-10	4.201e-09	4.201e-09	4.201e-09	4.201e-09	6.45409e-11	6.45409e-11	6.45409e-11	6.45409e-11	2.12449e-10	2.12449e-10	2.12449e-10	2.12449e-10	4.201e-09	4.201e-09	4.201e-09	4.201e-09
	incidence	1	1	1	1	1	1	1	1	1	1	1	1	1	1	1	1	1	1	1	1	1	1	1	1	1	1	1	1	1	1	1	1	1	1	1	1	1	1	1	1	1	1	1	1	1	1	1	1
	loglik	0.000290779	0.000290779	0.000290779	0.000290779	-4.45994e-05	-4.45994e-05	-4.45994e-05	-4.45994e-05	1.91478e-06	1.91478e-06	1.91478e-06	1.91478e-06	0.000290779	0.000290779	0.000290779	0.000290779	-4.45994e-05	-4.45994e-05	-4.45994e-05	-4.45994e-05	1.91478e-06	1.91478e-06	1.91478e-06	1.91478e-06	0.000290779	0.000290779	0.000290779	0.000290779	-4.45994e-05	-4.45994e-05	-4.45994e-05	-4.45994e-05	1.91478e-06	1.91478e-06	1.91478e-06	1.91478e-06	0.000290779	0.000290779	0.000290779	0.000290779	-4.45994e-05	-4.45994e-05	-4.45994e-05	-4.45994e-05	1.91478e-06	1.91478e-06	1.91478e-06	1.91478e-06
Hcr	inters	2.50826	3.02568	3.36775	4.26608	2.52968	2.96355	3.33174	4.17753	2.54509	3.0487	3.46185	4.06781	2.47913	2.93334	3.28434	4.12308	2.50627	2.87947	3.25919	4.12204	2.50463	2.92744	3.35177	3.99843	2.41087	2.82115	3.21089	4.08671	2.43563	2.77862	3.15587	4.05515	2.45655	2.85927	3.29411	3.95898	2.41163	2.80733	3.19626	3.99453	2.43932	2.76418	3.17485	3.94958	2.39853	2.84195	3.3148	3.95895
	incidence	0.995299	0.9976	1.0013	1.0009	0.995174	0.997528	1.00082	1.00268	0.995011	0.99697	0.998812	1.00178	0.995724	0.99913	1.00213	1.00226	0.995369	0.999499	1.00207	1.00303	0.995279	0.998698	0.998862	1.00173	0.995745	0.999341	1.00131	1.00064	0.995449	0.999417	1.00144	1.00131	0.995773	0.998828	0.999014	1.00106	0.994542	0.99849	0.998899	0.998738	0.994131	0.99797	0.998817	0.998965	0.994899	0.996825	0.996363	0.998778
	loglik	-458.778	-469.202	-472.251	-458.988	-455.217	-470.129	-472.939	-462.006	-456.768	-466.377	-474.783	-476.247	-458.849	-466.34	-469.173	-465.099	-452.628	-466.07	-467.268	-462.961	-458.714	-468.634	-473.401	-479.015	-443.184	-451.209	-453.897	-436.855	-436.418	-451.786	-450.186	-436.82	-442.803	-455.205	-453.015	-454.906	-422.109	-428.091	-429.96	-413.69	-417.859	-431.552	-424.667	-418.111	-427.723	-433.93	-426.907	-427.175
Cau	inters	NA	NA	NA	NA	NA	NA	NA	NA	NA	NA	NA	NA	NA	NA	NA	NA	NA	NA	NA	NA	NA	NA	NA	NA	NA	NA	NA	NA	NA	NA	NA	NA	NA	NA	NA	NA	NA	NA	NA	NA	NA	NA	NA	NA	NA	NA	NA	NA
	incidence	NA	NA	NA	NA	NA	NA	NA	NA	NA	NA	NA	NA	NA	NA	NA	NA	NA	NA	NA	NA	NA	NA	NA	NA	NA	NA	NA	NA	NA	NA	NA	NA	NA	NA	NA	NA	NA	NA	NA	NA	NA	NA	NA	NA	NA	NA	NA	NA
	loglik	NA	NA	NA	NA	NA	NA	NA	NA	NA	NA	NA	NA	NA	NA	NA	NA	NA	NA	NA	NA	NA	NA	NA	NA	NA	NA	NA	NA	NA	NA	NA	NA	NA	NA	NA	NA	NA	NA	NA	NA	NA	NA	NA	NA	NA	NA	NA	NA
Clu	inters	5.01436	5.49869	6.32821	7.56994	3.90487	4.75546	4.84393	5.38634	2.95213	3.52538	4.61617	5.39712	4.62499	5.00432	5.6368	6.57476	3.62106	4.3222	4.52373	4.9837	2.82828	3.35662	4.29837	4.9614	4.4159	4.85067	5.46193	6.23733	3.62736	4.26021	4.42607	4.81827	2.8068	3.3342	4.17014	4.8054	4.46542	5.13912	6.34176	8.09096	3.52264	4.08321	4.29139	4.70263	2.75604	3.28494	4.12186	4.74868
	incidence	1.00901	1.01518	1.01215	1.01951	1.01937	1.019	1.02653	1.02644	1.0052	1.00479	1.0077	1.0124	1.0058	1.00991	1.01393	1.02228	1.01728	1.01935	1.02511	1.02556	1.00419	1.00374	1.00883	1.01244	0.999364	1.00128	1.00808	1.01588	1.01347	1.01677	1.02019	1.02124	1.00264	1.00224	1.00909	1.0147	0.973676	0.974056	0.974546	0.979712	1.01164	1.01215	1.0138	1.01243	1.00136	1.00058	1.00599	1.01061
	loglik	-278.504	-261.296	-235.61	-187.912	-259.849	-241.804	-248.457	-231.233	-324.37	-304.09	-279.868	-268.582	-272.779	-257.364	-236.03	-202.609	-276.007	-269.239	-279.308	-262.139	-330.35	-310.408	-284.25	-272.131	-258.619	-250.676	-238.329	-213.143	-263.423	-247.915	-256.569	-244.182	-320.203	-303.013	-276.822	-270.728	-279.363	-281.689	-274.709	-255.953	-254.075	-241.626	-250.788	-237.762	-312.624	-295.662	-277.313	-268.702
Ala	inters	NA	NA	NA	NA	9.73096	10.9331	NA	NA	10.4954	11.424	11.7884	13.0328	NA	NA	NA	NA	11.6399	11.7599	NA	NA	12.7307	13.6667	15.619	16.55	NA	NA	NA	NA	NA	NA	NA	NA	NA	NA	NA	NA	NA	NA	NA	NA	NA	NA	NA	NA	NA	NA	NA	NA
	incidence	NA	NA	NA	NA	0.986997	0.978417	NA	NA	0.9867	0.988402	0.987668	0.982634	NA	NA	NA	NA	0.977723	0.977609	NA	NA	0.976731	0.975946	0.974471	0.973832	NA	NA	NA	NA	NA	NA	NA	NA	NA	NA	NA	NA	NA	NA	NA	NA	NA	NA	NA	NA	NA	NA	NA	NA
	loglik	NA	NA	NA	NA	-189.37	-175.736	NA	NA	-245.215	-234.11	-244.204	-231.854	NA	NA	NA	NA	-224.13	-263.614	NA	NA	-280.502	-285.051	-289.57	-320.941	NA	NA	NA	NA	NA	NA	NA	NA	NA	NA	NA	NA	NA	NA	NA	NA	NA	NA	NA	NA	NA	NA	NA	NA
Uar	inters	2.75508e-09	0.103492	0.331002	0.669043	1.64514e-09	1.64514e-09	0.138507	0.401404	1.01354e-09	1.01354e-09	0.0532139	0.21668	2.75508e-09	0.0953917	0.363066	0.64878	1.64514e-09	1.64514e-09	0.139318	0.406509	1.01354e-09	1.01354e-09	0.0565733	0.233529	2.75508e-09	0.0990233	0.364106	0.630199	1.64514e-09	1.64514e-09	0.137102	0.369529	1.01354e-09	1.01354e-09	0.0518442	0.227173	2.75508e-09	0.101481	0.386025	0.619021	1.64514e-09	1.64514e-09	0.150593	0.36927	1.01354e-09	1.01354e-09	0.0497567	0.214674
	incidence	1	0.977133	1.00251	0.998275	1	1	0.992387	1.00274	1	1	1.01505	1.02061	1	0.998128	1.00023	1.00091	1	1	0.997452	1.00285	1	1	0.997022	1.01968	1	0.999913	0.99857	1.00173	1	1	0.999429	1.00379	1	1	1.00866	1.0202	1	1.00236	0.997381	1.00166	1	1	0.997504	1.00238	1	1	1.01272	1.02122
	loglik	9.46864e-07	-68.9832	-184.021	-257.421	3.73303e-06	3.73303e-06	-90.6096	-201.636	-9.61548e-07	-9.61548e-07	-52.7267	-154.472	9.46864e-07	-73.6574	-196.487	-265.794	3.73303e-06	3.73303e-06	-95.9977	-210.613	-9.61548e-07	-9.61548e-07	-50.5602	-165.846	9.46864e-07	-77.5051	-194.722	-267.497	3.73303e-06	3.73303e-06	-98.3249	-199.352	-9.61548e-07	-9.61548e-07	-49.1938	-162.224	9.46864e-07	-82.8741	-202.122	-265.782	3.73303e-06	3.73303e-06	-105.605	-196.547	-9.61548e-07	-9.61548e-07	-48.7163	-154.091
Mlu	inters	6.11078	6.54898	6.7415	7.85997	8.45586	9.25127	10.4237	12.1701	4.34274	5.19713	5.61964	6.69356	4.60591	4.97694	5.27721	6.48175	6.67468	7.43752	8.32615	9.17953	3.64801	4.27689	4.73808	5.07105	4.74097	4.71686	4.87766	6.11279	6.76456	7.3571	8.08332	8.90056	3.35501	3.98927	4.6695	4.99049	4.23941	3.90895	3.87258	4.30585	5.64988	5.99244	6.64665	7.79668	3.18754	3.83024	4.43954	4.60352
	incidence	0.994018	0.999228	1.00024	0.99992	0.989736	0.993251	0.988525	0.980665	0.993916	0.991989	0.993882	0.989552	1.00607	1.00881	1.01103	1.01042	1.0025	1.00677	1.00233	1.00197	1.00165	0.998922	0.99845	0.99959	1.0062	1.00963	1.01406	1.01291	1.00174	1.00515	1.00466	1.00818	1.00498	1.00332	1.00306	1.00485	1.00967	1.01456	1.01657	1.01738	1.00511	1.00682	1.00676	1.00584	1.00596	1.00408	1.00406	1.00646
	loglik	-352.003	-403.173	-452.782	-451.16	-356.01	-389.702	-410.661	-396.085	-375.861	-368.748	-383.068	-382.33	-380.728	-424.015	-460.225	-461.321	-396.001	-414.058	-436.746	-421.563	-392.686	-402.644	-420.513	-454.807	-331.511	-374.77	-386.049	-370.874	-367.466	-381.922	-400.363	-378.011	-373.623	-378.362	-375.508	-396.418	-320.153	-372.886	-412.128	-441.922	-388.056	-433.926	-449.459	-485.03	-377.331	-384.658	-385.658	-415.376
Mpu	inters	7.89344e-10	7.89344e-10	7.89344e-10	7.89344e-10	3.03049e-12	3.03049e-12	3.03049e-12	3.03049e-12	2.14566e-09	2.14566e-09	2.14566e-09	2.14566e-09	7.89344e-10	7.89344e-10	7.89344e-10	7.89344e-10	3.03049e-12	3.03049e-12	3.03049e-12	3.03049e-12	2.14566e-09	2.14566e-09	2.14566e-09	2.14566e-09	7.89344e-10	7.89344e-10	7.89344e-10	7.89344e-10	3.03049e-12	3.03049e-12	3.03049e-12	3.03049e-12	2.14566e-09	2.14566e-09	2.14566e-09	2.14566e-09	7.89344e-10	7.89344e-10	7.89344e-10	7.89344e-10	3.03049e-12	3.03049e-12	3.03049e-12	3.03049e-12	2.14566e-09	2.14566e-09	2.14566e-09	2.14566e-09
	incidence	1	1	1	1	1	1	1	1	1	1	1	1	1	1	1	1	1	1	1	1	1	1	1	1	1	1	1	1	1	1	1	1	1	1	1	1	1	1	1	1	1	1	1	1	1	1	1	1
	loglik	-7.22852e-06	-7.22852e-06	-7.22852e-06	-7.22852e-06	0.00256918	0.00256918	0.00256918	0.00256918	-6.34628e-06	-6.34628e-06	-6.34628e-06	-6.34628e-06	-7.22852e-06	-7.22852e-06	-7.22852e-06	-7.22852e-06	0.00256918	0.00256918	0.00256918	0.00256918	-6.34628e-06	-6.34628e-06	-6.34628e-06	-6.34628e-06	-7.22852e-06	-7.22852e-06	-7.22852e-06	-7.22852e-06	0.00256918	0.00256918	0.00256918	0.00256918	-6.34628e-06	-6.34628e-06	-6.34628e-06	-6.34628e-06	-7.22852e-06	-7.22852e-06	-7.22852e-06	-7.22852e-06	0.00256918	0.00256918	0.00256918	0.00256918	-6.34628e-06	-6.34628e-06	-6.34628e-06	-6.34628e-06
Mma	inters	4.22396e-10	4.22396e-10	4.22396e-10	4.22396e-10	1.8788e-09	1.8788e-09	3.25009e-11	3.25009e-11	5.15515e-12	5.15515e-12	1.08493e-11	1.08493e-11	4.22396e-10	4.22396e-10	4.22396e-10	4.22396e-10	1.8788e-09	1.8788e-09	3.25009e-11	3.25009e-11	5.15515e-12	5.15515e-12	1.08493e-11	1.08493e-11	4.22396e-10	4.22396e-10	4.22396e-10	4.22396e-10	1.8788e-09	1.8788e-09	3.25009e-11	3.25009e-11	5.15515e-12	5.15515e-12	1.08493e-11	1.08493e-11	4.22396e-10	4.22396e-10	4.22396e-10	4.22396e-10	1.8788e-09	1.8788e-09	3.25009e-11	3.25009e-11	5.15515e-12	5.15515e-12	1.08493e-11	1.08493e-11
	incidence	1	1	1	1	1	1	1	1	0.999999	0.999999	1	1	1	1	1	1	1	1	1	1	0.999999	0.999999	1	1	1	1	1	1	1	1	1	1	0.999999	0.999999	1	1	1	1	1	1	1	1	1	1	0.999999	0.999999	1	1
	loglik	1.51014e-05	1.51014e-05	1.51014e-05	1.51014e-05	1.74722e-06	1.74722e-06	0.000348285	0.000348285	0.00277291	0.00277291	0.000624535	0.000624535	1.51014e-05	1.51014e-05	1.51014e-05	1.51014e-05	1.74722e-06	1.74722e-06	0.000348285	0.000348285	0.00277291	0.00277291	0.000624535	0.000624535	1.51014e-05	1.51014e-05	1.51014e-05	1.51014e-05	1.74722e-06	1.74722e-06	0.000348285	0.000348285	0.00277291	0.00277291	0.000624535	0.000624535	1.51014e-05	1.51014e-05	1.51014e-05	1.51014e-05	1.74722e-06	1.74722e-06	0.000348285	0.000348285	0.00277291	0.00277291	0.000624535	0.000624535
Ggu	inters	11.2219	11.1832	10.4215	11.2986	9.73513	10.4142	11.6309	12.566	7.21851	8.74713	8.35333	9.86229	13.2313	13.6656	12.7431	12.2689	12.7861	13.9698	14.3507	14.6357	9.24563	11.2357	11.5011	11.7601	23.7219	23.399	22.4339	23.5912	18.6252	21.6021	22.7269	23.4481	11.5721	13.4001	14.99	19.1111	36.0607	42.2113	50.8216	61.098	25.9926	34.236	41.3919	43.0955	11.756	13.6559	16.8133	23.9054
	incidence	0.997422	0.997693	0.999533	0.998876	1	0.998835	0.997235	0.995599	1.00181	1.00122	1.00178	0.998436	0.996053	0.996379	0.997976	0.99908	0.998033	0.998298	0.997638	0.996521	1.0008	0.999413	1.00034	1.00041	0.993232	0.994523	0.995552	0.995467	0.995562	0.99462	0.993574	0.991246	1.00167	0.999543	0.997729	0.994533	0.98361	0.984135	0.983267	0.977822	0.991755	0.987913	0.98625	0.983792	1.00259	1.00077	0.997572	0.99254
	loglik	-172.267	-163.521	-160.975	-140.293	-198.457	-187.301	-167.705	-146.479	-251.733	-216.469	-225.719	-207.587	-215.239	-202.806	-212.424	-220.791	-223.663	-202.354	-198.892	-208.634	-266.754	-247.901	-238.839	-246.281	-188.055	-211.445	-257.672	-267.228	-223.939	-228.654	-263.584	-303.533	-239.059	-251.841	-255.362	-246.997	-242.037	-245.68	-257.13	-280.013	-213.666	-190.651	-173.986	-215.243	-248.747	-263.993	-259.951	-236.012
Llu	inters	0.620115	0.841436	1.06591	1.3516	0.499274	0.76388	0.963357	1.24395	0.510984	0.80032	0.990605	1.2754	0.627266	0.857191	1.08532	1.34526	0.505558	0.77437	0.986496	1.23853	0.5173	0.802159	1.01757	1.27549	0.639071	0.870628	1.10164	1.3477	0.519426	0.786948	1.00153	1.22641	0.52825	0.815056	1.03055	1.27241	0.65785	0.880631	1.07708	1.30816	0.530023	0.812779	1.01296	1.23659	0.536885	0.832332	1.01823	1.27605
	incidence	1.01677	1.01348	1.0115	1.01168	1.01912	1.01468	1.01292	1.01334	1.01909	1.01383	1.01242	1.01266	1.01646	1.01312	1.01142	1.0123	1.0188	1.01447	1.01268	1.01418	1.01877	1.01377	1.01177	1.01312	1.01595	1.01266	1.01065	1.01195	1.01808	1.014	1.01191	1.01394	1.01822	1.0133	1.01137	1.0129	1.01515	1.01232	1.01098	1.0125	1.01754	1.01305	1.01155	1.01369	1.01779	1.01268	1.01156	1.01264
	loglik	-371.9	-394.509	-407.228	-429.961	-353.292	-389.093	-402.797	-429.562	-355.252	-392.7	-406.256	-434.585	-372.982	-399.069	-410.789	-429.215	-353.315	-392.946	-405.381	-424.782	-355.56	-394.987	-407.11	-432.438	-372.488	-396.81	-408.886	-424.788	-352.73	-390.296	-405.981	-423.68	-355.017	-394.437	-407.06	-430.848	-375.711	-397.857	-404.651	-420.622	-353.621	-391.725	-405.006	-420.72	-356.69	-394.617	-404.204	-428.003
Fsi	inters	1.509	2.6929	4.83576	7.16561	2.16244	2.76721	3.23253	4.37379	2.61598	3.38613	4.12792	4.7005	1.50958	2.57476	4.60096	7.37554	2.14763	2.79017	3.20598	4.32534	2.61435	3.23592	3.86206	4.52753	1.55771	2.59227	4.89123	8.41735	2.12872	2.93112	3.30057	4.82244	2.65751	3.33194	4.12129	4.73424	1.69455	3.08116	6.7802	15.1796	2.16444	3.00765	3.79535	5.87556	2.54811	3.40788	4.24082	4.86475
	incidence	1.00326	0.999152	0.995657	0.993535	0.997514	0.998786	0.997935	0.99763	0.998029	0.998694	0.997805	0.996462	1.00372	0.998946	0.99655	0.992496	0.997391	0.996398	0.996047	0.997337	0.998268	0.999022	0.998803	0.997249	1.00426	1.00272	0.998649	0.994821	0.999907	0.99956	0.999043	0.99709	0.997704	0.996819	0.996301	0.995709	1.00566	1.00202	0.997871	0.991794	1.00366	1.0039	1.00215	1.00057	1	0.998783	0.997615	0.998987
	loglik	-248.154	-272.262	-250.877	-238.21	-233.791	-217.617	-215.994	-220.434	-201.295	-185.759	-188.436	-181.723	-243.552	-276.289	-264.252	-253.001	-223.894	-222.143	-229.017	-227.225	-192.825	-184.447	-191.885	-185.086	-260.428	-313.698	-319.553	-315.175	-242.017	-239.227	-259.149	-275.604	-200.711	-200.18	-212.258	-217.253	-323.037	-403.383	-406.334	-359.183	-269.071	-271.763	-289.042	-317.335	-215.253	-206.584	-224.583	-233.442
Lly	inters	4.76895e-10	4.76895e-10	4.76895e-10	4.76895e-10	1.20108e-10	1.20108e-10	1.20108e-10	1.20108e-10	1.64514e-09	1.64514e-09	1.64514e-09	1.64514e-09	4.76895e-10	4.76895e-10	4.76895e-10	4.76895e-10	1.20108e-10	1.20108e-10	1.20108e-10	1.20108e-10	1.64514e-09	1.64514e-09	1.64514e-09	1.64514e-09	4.76895e-10	4.76895e-10	4.76895e-10	4.76895e-10	1.20108e-10	1.20108e-10	1.20108e-10	1.20108e-10	1.64514e-09	1.64514e-09	1.64514e-09	1.64514e-09	4.76895e-10	4.76895e-10	4.76895e-10	4.76895e-10	1.20108e-10	1.20108e-10	1.20108e-10	1.20108e-10	1.64514e-09	1.64514e-09	1.64514e-09	1.64514e-09
	incidence	1	1	1	1	1	1	1	1	1	1	1	1	1	1	1	1	1	1	1	1	1	1	1	1	1	1	1	1	1	1	1	1	1	1	1	1	1	1	1	1	1	1	1	1	1	1	1	1
	loglik	1.62273e-05	1.62273e-05	1.62273e-05	1.62273e-05	0.000132943	0.000132943	0.000132943	0.000132943	1.29943e-06	1.29943e-06	1.29943e-06	1.29943e-06	1.62273e-05	1.62273e-05	1.62273e-05	1.62273e-05	0.000132943	0.000132943	0.000132943	0.000132943	1.29943e-06	1.29943e-06	1.29943e-06	1.29943e-06	1.62273e-05	1.62273e-05	1.62273e-05	1.62273e-05	0.000132943	0.000132943	0.000132943	0.000132943	1.29943e-06	1.29943e-06	1.29943e-06	1.29943e-06	1.62273e-05	1.62273e-05	1.62273e-05	1.62273e-05	0.000132943	0.000132943	0.000132943	0.000132943	1.29943e-06	1.29943e-06	1.29943e-06	1.29943e-06
Lpa	inters	9.23417	9.12338	10.0693	10.4639	8.83799	8.96754	10.0133	11.6349	8.27802	8.51671	8.94383	9.34828	12.9023	14.6979	14.7611	21.0055	12.7079	17.9529	21.5335	38.6199	10.8063	13.8137	16.5371	17.9009	10.6746	17.6612	18.7103	16.2276	6.90818	6.50518	6.85457	16.143	9.1691	14.185	19.8105	25.9021	14.291	13.6817	14.028	13.1117	9.03829	8.55996	11.177	11.1056	9.55102	11.2141	12.4416	13.1011
	incidence	1.0124	1.01338	1.01228	1.01252	1.01287	1.01327	1.01373	1.01227	1.01263	1.01443	1.01421	1.01406	1.00897	1.00874	1.01003	1.00614	1.00968	1.00715	1.00812	1.00152	1.00991	1.0112	1.00877	1.00798	1.0183	1.01376	1.0154	1.01737	1.02431	1.02583	1.03003	1.02235	1.01813	1.01669	1.01636	1.01518	1.01362	1.01535	1.01556	1.01658	1.01671	1.018	1.01584	1.01687	1.01325	1.01238	1.01135	1.01242
	loglik	-304.66	-309.625	-312.488	-302.042	-333.01	-345.464	-287.845	-269.429	-298.493	-267.168	-270.587	-255.164	-466.401	-481.794	-498.708	-457.232	-555.313	-543.27	-504.326	-431.172	-532.922	-459.502	-494.736	-499.272	-400.707	-362.513	-314.782	-346.795	-587.546	-685.505	-619.477	-542.815	-636.068	-558.128	-500.188	-459.054	-244.329	-225.45	-221.975	-226.94	-288.83	-300.233	-261.932	-226.954	-401.567	-387.902	-389.885	-364.078
Hic	inters	6.8649	7.45447	8.46308	8.99341	6.09676	6.554	6.74057	8.69721	6.31595	7.0491	6.99945	7.53809	7.72657	8.50204	9.23376	10.6643	7.16907	7.61104	7.42742	9.39603	7.08436	7.58119	8.00075	8.61893	8.3673	9.63483	11.1874	15.448	7.51483	7.90702	9.36779	12.8831	6.94927	7.77001	9.99982	14.132	8.25665	9.62566	11.4515	14.7949	7.45295	7.73633	9.08406	12.1061	6.60656	7.21349	8.90148	10.5055
	incidence	1.0009	1.00283	1.00245	1.0035	1.00178	1.00358	1.00447	1.00256	1.0015	1.00102	1.0028	1.00413	0.998129	0.999871	1.00154	1.00071	0.999834	1.00153	1.00344	1.00216	1.00029	1.00112	1.00148	1.00267	0.995509	0.99757	0.996201	0.99446	0.999102	1.00215	1.0017	1.00078	0.999933	1.00152	0.999247	0.997266	0.99536	0.994219	0.993	0.989863	0.997733	1.00037	0.99875	0.995584	1.00031	1.00076	0.998777	0.996615
	loglik	-358.141	-359.467	-384.259	-399.258	-350.087	-353.368	-374.428	-375.834	-319.06	-324.611	-358.054	-383.681	-334.211	-331.351	-340.348	-337.956	-337.425	-347.214	-395.401	-374.082	-317.827	-339.028	-359.093	-363.251	-404.365	-430.141	-497.539	-472.088	-406.688	-460.029	-499.233	-461.901	-445.644	-482.534	-498.185	-476.089	-343.595	-372.258	-389.901	-386.273	-345.104	-384.149	-390.316	-375.411	-395.601	-448.913	-477.467	-559.041
Gge	inters	8.98043	8.9399	9.42613	10.4173	8.54869	9.10957	9.85188	10.5205	7.41359	8.38046	9.80022	11.1594	8.70339	8.64787	9.03538	9.8494	8.43312	8.94076	9.54077	10.1828	7.23763	8.0607	9.29535	10.9695	7.24013	7.07797	7.85479	8.89794	7.51462	7.64986	8.13266	8.71633	6.82633	7.50708	8.19209	9.092	7.15821	7.04487	7.45306	8.50252	7.21716	7.27404	7.66655	8.20044	6.51163	6.98327	7.43277	8.07717
	incidence	1.01167	1.01458	1.01491	1.01513	1.01107	1.01068	1.00945	1.01064	1.0133	1.01155	1.00824	1.00504	1.01259	1.01553	1.01629	1.017	1.01083	1.01072	1.01033	1.01139	1.0129	1.01199	1.0093	1.00628	1.016	1.01859	1.01795	1.0178	1.01193	1.01311	1.01355	1.01359	1.01299	1.01254	1.01203	1.01099	1.0152	1.01735	1.01767	1.01679	1.00988	1.01333	1.01434	1.01425	1.00721	1.00713	1.01121	1.01291
	loglik	-243.212	-255.792	-294.051	-331.778	-262.452	-272.757	-306.532	-348.148	-301.632	-288.656	-311.788	-335.494	-234.743	-251.235	-289.491	-320.369	-252.779	-261.55	-293.882	-333.773	-301.911	-290.295	-306.594	-308.531	-255.451	-287.965	-323.962	-348.624	-256.416	-275.698	-297.473	-346.639	-296.661	-283.236	-301.967	-315.507	-257.93	-302.296	-370.788	-414.406	-265.507	-279.257	-304.934	-361.749	-308.769	-303.582	-307.668	-310.314
Rru	inters	9.90196	13.3286	16.4315	21.2151	9.69954	13.4417	15.7801	18.9962	9.10056	11.0999	13.5716	17.605	10.3182	14.3799	17.3649	22.5246	9.99815	13.6645	15.7625	19.7699	9.19478	11.3759	13.9781	20.095	10.4485	13.4727	16.1261	19.8628	9.44019	12.6952	15.2856	18.4684	9.12091	11.5659	14.4557	18.1937	9.48205	12.6694	15.9424	18.7267	8.93315	11.8938	14.4006	16.7209	8.77025	11.0487	13.1783	16.5971
	incidence	0.948327	0.929987	0.916459	0.880705	0.959354	0.958337	0.949552	0.928497	0.966594	0.96238	0.956016	0.929829	0.948315	0.933323	0.922639	0.869662	0.964807	0.961523	0.949998	0.932385	0.968413	0.961978	0.95544	0.917035	0.96019	0.951857	0.943577	0.896936	0.971666	0.9716	0.958762	0.949249	0.972056	0.963595	0.957689	0.940373	0.965723	0.962486	0.961211	0.93949	0.978499	0.980223	0.973353	0.9634	0.975013	0.967675	0.962516	0.949758
	loglik	-383.989	-361.624	-340.863	-327.259	-439.922	-396.189	-412.042	-409.7	-438.877	-438.911	-463.978	-443.394	-394.175	-357.549	-340.594	-331.516	-443.364	-413.167	-443.203	-418.88	-456.095	-454.223	-481.43	-427.727	-369.639	-351.949	-335.659	-343.243	-442.873	-418.035	-423.908	-408.179	-457.309	-449.221	-449.665	-437.658	-406.172	-376.784	-331.319	-355.955	-435.483	-398.84	-390.527	-395.772	-440.736	-426.541	-436.958	-415.757
Cib	inters	8.98014	9.80621	11.5843	13.6883	8.42971	9.26654	9.96217	13.0845	8.58748	9.22392	9.84816	11.4952	10.4868	11.7157	13.5119	14.8604	9.4512	10.0529	10.8013	13.7818	10.043	10.7311	11.0689	13.3416	12.4971	12.813	14.6581	17.3345	11.1765	11.9857	12.7512	15.9779	9.81461	11.1612	12.484	15.7255	14.537	16.1654	17.9193	22.0519	12.2175	14.1159	14.6622	17.666	9.28635	10.5415	11.694	14.9354
	incidence	0.996708	1.00176	1.0024	1.0012	1.00148	1.00119	1.00166	1.00037	0.998196	0.999083	0.997291	0.999222	0.99368	0.997429	0.997732	1.00178	0.998731	0.99841	1.00045	0.998606	0.995226	0.995648	0.996041	0.997191	0.984922	0.9856	0.98617	0.986974	0.990228	0.989331	0.989502	0.989775	0.993061	0.99131	0.990094	0.990512	0.981039	0.975529	0.971366	0.973556	0.986914	0.984402	0.984105	0.98639	0.993385	0.992468	0.991654	0.992463
	loglik	-460.75	-465.105	-451.347	-461.547	-389.072	-426.178	-454.081	-431.708	-398.36	-445.274	-509.185	-516.089	-420.622	-420.337	-416.171	-426.754	-383.696	-418.202	-425.424	-406.443	-377.758	-416.929	-462.105	-463.042	-398.989	-462.759	-480.482	-493.152	-343.966	-374.779	-408.746	-366.703	-370.437	-385.594	-398.761	-375.258	-394.866	-436.79	-466.712	-452.178	-331.484	-343.344	-387.282	-370.196	-377.573	-395.939	-401.192	-362.463
Cpy	inters	27.2896	26.9964	27.4783	29.2001	22.877	24.9204	25.9381	26.3697	14.8763	20.3278	25.3113	27.7555	20.9613	21.2058	21.0523	20.9133	17.4639	17.6832	18.1118	18.8504	11.7437	14.2252	18.3641	17.8381	15.4686	15.516	19.2143	21.4719	13.341	13.4699	9.89711	8.75901	10.2835	10.9327	9.86774	8.31353	10.8525	11.0858	11.3054	11.3062	7.15487	7.67286	7.63812	8.84599	6.4344	6.06891	5.29147	4.68497
	incidence	0.99376	0.996252	0.995676	0.998377	0.995276	0.994969	0.997507	0.996997	0.999653	0.996441	0.998244	0.998489	0.993619	0.997524	0.998716	0.999904	0.995156	0.99779	0.99883	1.00047	0.99846	0.998642	0.998403	1.00003	1.00164	1.00621	1.00502	1.00557	1.00085	1.00291	1.01183	1.01758	1.0025	1.00424	1.01133	1.01699	1.00618	1.01037	1.01292	1.0141	1.00978	1.01041	1.01546	1.01537	1.00972	1.01206	1.01728	1.02052
	loglik	-266.788	-284.872	-340.597	-309.033	-299.664	-330.107	-313.207	-361.561	-391.924	-376.746	-311.092	-290.397	-274.2	-234.097	-253.023	-269.7	-309.201	-306.458	-312.967	-316.924	-428.6	-405.523	-331.267	-340.995	-361.331	-335.578	-331.285	-345.899	-394.596	-450.339	-440.61	-415.225	-426.461	-461.736	-440.137	-437.415	-413.212	-386.803	-352.64	-349.782	-454.989	-510.392	-429.384	-434.056	-406.735	-457.743	-447.015	-461.518
Oam	inters	5.42512	5.1044	5.50089	6.27683	5.5778	5.68817	7.23887	8.42023	5.5938	6.54009	7.50749	9.85252	6.71864	7.19649	8.30333	10.4579	6.16563	7.09805	10.6688	13.4672	6.90524	9.12754	10.4455	13.1282	5.76124	6.77469	8.18368	11.4806	5.59921	7.10532	10.5089	13.3723	6.99967	9.30209	10.2027	12.2905	6.75626	8.53021	11.5265	14.3662	4.78325	5.90998	8.5805	11.3141	6.37842	8.51776	8.67007	9.9274
	incidence	0.997224	1.00551	1.00749	1.01114	0.990598	0.995959	0.996951	1.00261	0.990311	0.990085	0.995399	0.993646	1.0003	1.00043	1.0014	0.999744	0.999106	0.997425	0.995339	0.99283	0.996762	0.994369	0.993293	0.991547	0.997788	0.995889	0.996229	0.996617	0.995315	0.992675	0.988693	0.987139	0.99627	0.993931	0.994357	0.993997	1.00045	1.00101	0.997931	0.995168	1.00736	1.00808	1.00546	1.00415	0.997302	0.997001	0.997023	0.998004
	loglik	-306.171	-342.014	-347.224	-331.817	-346.818	-404.524	-373.551	-342.227	-388.918	-407.119	-417.689	-406.627	-324.433	-351.675	-359.658	-389.83	-371.17	-433.077	-371.774	-358.672	-371.379	-351.808	-377.054	-369.495	-365.217	-393.139	-405.845	-377.02	-402.831	-425.743	-361.152	-351.734	-341.144	-297.136	-317.1	-310.768	-418.174	-410.96	-399.589	-419.758	-398.963	-437.184	-449.767	-470.037	-337.878	-287.82	-355.372	-402.242
		V1	V2	V3	V4	V5	V6	V7	V8	V9	V10	V11	V12	V17	V18	V19	V20	V21	V22	V23	V24	V25	V26	V27	V28	V33	V34	V35	V36	V37	V38	V39	V40	V41	V42	V43	V44	V49	V50	V51	V52	V53	V54	V55	V56	V57	V58	V59	V60
		2.273e-19	2.90014e-19	1.58837e-18	1.2592e-17	9.73715e-21	1.94587e-18	7.36633e-13	3.26153e-15	6.91043e-17	2.72738e-13	4.23298e-09	4.39124e-09	3.43465e-18	5.43814e-15	8.31357e-11	7.80058e-09	2.58045e-18	1.18892e-13	2.54702e-08	1.69384e-07	2.09506e-17	9.54134e-14	5.20107e-10	2.07952e-06	4.43099e-11	3.83746e-06	0.000465899	0.165264	4.61548e-11	1.19259e-06	0.0230473	0.944505	4.68076e-14	6.41433e-10	1.91258e-05	0.218336	0.00533956	0.107918	0.460044	0.692887	0.00478278	0.228656	0.48826	0.0313451	0.000707368	0.0934543	0.979317	0.00539293
		0.707532	0.729006	0.886139	0.911498	0.822949	0.690301	0.0331873	0.175592	0.646891	0.111078	0.0015191	0.00148432	0.772728	0.504612	0.0335694	0.00340227	0.757767	0.0822918	0.000247633	5.3045e-05	0.843477	0.343495	0.0115548	2.24887e-05	0.0327538	1.53917e-05	2.60395e-08	3.373e-15	0.00994969	7.04228e-06	1.48755e-13	4.33362e-22	0.528666	0.025599	8.7155e-06	1.93282e-15	4.83191e-10	2.1951e-14	2.21676e-17	3.6664e-22	9.47384e-11	3.71569e-17	2.51173e-25	2.31135e-32	2.23945e-06	1.30624e-12	1.85551e-19	4.05547e-32
		NA	NA	NA	NA	NA	NA	NA	NA	NA	NA	NA	NA	NA	NA	NA	NA	NA	NA	NA	NA	NA	NA	NA	NA	NA	NA	NA	NA	NA	NA	NA	NA	NA	NA	NA	NA	NA	NA	NA	NA	NA	NA	NA	NA	NA	NA	NA	NA
		0.000414539	1.76903e-12	1.27394e-22	2.6012e-34	4.55224e-07	5.42571e-19	5.99447e-31	7.21199e-55	0.0229806	9.65324e-12	3.32404e-30	1.82249e-44	0.00952968	1.47189e-09	2.31297e-15	2.74939e-26	0.000179969	1.27393e-14	7.21387e-21	3.54792e-41	0.183174	4.69504e-09	4.84615e-22	5.53016e-39	0.264168	5.12252e-06	1.2432e-09	3.37133e-17	0.0250142	5.11889e-10	7.21984e-14	1.02862e-33	0.617805	1.56384e-06	2.71589e-16	1.81344e-29	0.871035	0.00039427	1.26451e-06	4.23508e-13	0.310826	4.59033e-07	5.25366e-09	2.09639e-24	0.921217	3.59805e-05	3.14293e-13	5.6304e-25
		0.69937	0.691906	0.526508	0.050399	0.761482	0.657102	0.907906	0.66452	0.378522	0.76078	0.906338	0.0811635	0.0529938	0.0751717	0.00185903	1.42924e-05	0.188452	0.318075	0.0165195	0.00448665	0.0168314	0.0963292	0.0176403	0.000153044	0.000117428	0.000400053	7.00409e-09	1.34386e-12	0.00119196	0.00694975	6.44381e-07	3.45109e-07	0.000298979	0.0024448	4.54348e-06	4.68203e-10	2.30596e-07	2.17666e-06	6.48087e-13	8.82225e-17	1.4357e-06	5.10233e-05	1.60329e-11	9.93521e-12	2.61285e-05	0.000180605	5.0103e-08	2.19714e-12
		NA	NA	NA	NA	NA	NA	NA	NA	NA	NA	NA	NA	NA	NA	NA	NA	NA	NA	NA	NA	NA	NA	NA	NA	NA	NA	NA	NA	NA	NA	NA	NA	NA	NA	NA	NA	NA	NA	NA	NA	NA	NA	NA	NA	NA	NA	NA	NA
		0.994597	0.994597	0.994597	0.994597	0.998832	0.998832	0.998832	0.998832	0.999366	0.999366	0.999366	0.999366	0.994597	0.994597	0.994597	0.994597	0.998832	0.998832	0.998832	0.998832	0.999366	0.999366	0.999366	0.999366	0.994597	0.994597	0.994597	0.994597	0.998832	0.998832	0.998832	0.998832	0.999366	0.999366	0.999366	0.999366	0.994597	0.994597	0.994597	0.994597	0.998832	0.998832	0.998832	0.998832	0.999366	0.999366	0.999366	0.999366
		1	1	1	1	1	1	1	1	1	1	1	1	1	1	1	1	1	1	1	1	1	1	1	1	1	1	1	1	1	1	1	1	1	1	1	1	1	1	1	1	1	1	1	1	1	1	1	1
		NA	NA	NA	NA	NA	NA	NA	NA	NA	NA	NA	NA	NA	NA	NA	NA	NA	NA	NA	NA	NA	NA	NA	NA	NA	NA	NA	NA	NA	NA	NA	NA	NA	NA	NA	NA	NA	NA	NA	NA	NA	NA	NA	NA	NA	NA	NA	NA
		0.998775	0.998775	0.998775	0.998775	0.998434	0.998434	0.998434	0.998434	0.992033	0.992033	0.992033	0.992033	0.998775	0.998775	0.998775	0.998775	0.998434	0.998434	0.998434	0.998434	0.992033	0.992033	0.992033	0.992033	0.998775	0.998775	0.998775	0.998775	0.998434	0.998434	0.998434	0.998434	0.992033	0.992033	0.992033	0.992033	0.998775	0.998775	0.998775	0.998775	0.998434	0.998434	0.998434	0.998434	0.992033	0.992033	0.992033	0.992033
		1	1	1	1	1	1	1	1	1	1	1	1	1	1	1	1	1	1	1	1	1	1	1	1	1	1	1	1	1	1	1	1	1	1	1	1	1	1	1	1	1	1	1	1	1	1	1	1
		NA	NA	NA	NA	NA	NA	NA	NA	NA	NA	NA	NA	NA	NA	NA	NA	NA	NA	NA	NA	NA	NA	NA	NA	NA	NA	NA	NA	NA	NA	NA	NA	NA	NA	NA	NA	NA	NA	NA	NA	NA	NA	NA	NA	NA	NA	NA	NA
		1.39281e-84	1.48546e-84	2.41772e-82	2.20002e-84	3.46494e-06	1.5799e-06	5.36137e-07	1.39569e-06	0.99935	0.99935	0.99935	0.99935	4.16477e-81	2.74321e-80	6.7441e-79	4.50013e-81	1.08621e-05	4.69444e-06	2.3452e-06	4.27549e-06	0.99935	0.99935	0.99935	0.99935	1.65976e-77	4.03094e-76	5.20864e-74	1.05318e-77	1.77577e-05	1.85599e-05	9.2985e-06	7.81815e-06	0.99935	0.99935	0.99935	0.99935	3.95161e-78	3.57809e-78	6.94168e-77	7.58426e-81	3.03276e-05	2.54491e-05	1.34627e-05	1.00248e-05	0.99935	0.99935	0.99935	0.99935
		0.00635787	0.00288276	0.00250536	0.00219113	0.00144199	0.00139416	0.00133418	0.0046745	1	1	1	1	0.00541738	0.00360891	0.00216942	0.00172591	0.00455997	0.0041284	0.00387613	0.0155572	1	1	1	1	0.00189232	0.00170086	0.00108457	0.000535037	0.0170596	0.0177324	0.0162116	0.0347849	1	1	1	1	0.00421108	0.00295627	0.00200445	0.000926663	0.0662409	0.0570828	0.0546106	0.0764235	1	1	1	1
		NA	NA	NA	NA	NA	NA	NA	NA	NA	NA	NA	NA	NA	NA	NA	NA	NA	NA	NA	NA	NA	NA	NA	NA	NA	NA	NA	NA	NA	NA	NA	NA	NA	NA	NA	NA	NA	NA	NA	NA	NA	NA	NA	NA	NA	NA	NA	NA
		0.999105	1.93662e-15	9.73077e-18	3.13126e-09	0.992918	2.97757e-07	5.98417e-18	8.85e-09	0.998387	0.998387	7.55041e-25	2.32015e-16	0.999105	1.89274e-16	5.1496e-19	6.21375e-10	0.992918	2.97757e-07	7.05101e-18	9.20406e-09	0.998387	0.998387	3.99776e-25	2.97248e-17	0.999105	4.1727e-16	7.96306e-20	8.89003e-11	0.992918	2.97757e-07	1.68479e-17	8.74132e-09	0.998387	0.998387	2.37134e-25	1.94681e-17	0.999105	4.02101e-15	6.96949e-21	1.13295e-11	0.992918	1.02977e-06	1.97641e-16	8.15124e-08	0.998387	0.998387	1.51945e-25	6.86793e-18
		1	0.284696	0.10567	0.164852	1	0.494621	0.203741	0.0298376	1	1	8.36114e-05	3.04255e-07	1	0.45962	0.336359	0.4182	1	0.494621	0.212989	0.0360347	1	1	1.01391e-06	1.45229e-09	1	0.943972	0.873569	0.886648	1	0.494621	0.185057	0.0588287	1	1	9.16599e-09	2.01932e-10	1	0.465662	0.280175	0.773714	1	0.858232	0.0889467	0.0370958	1	1	9.37654e-11	8.38244e-12
		NA	NA	NA	NA	NA	NA	NA	NA	NA	NA	NA	NA	NA	NA	NA	NA	NA	NA	NA	NA	NA	NA	NA	NA	NA	NA	NA	NA	NA	NA	NA	NA	NA	NA	NA	NA	NA	NA	NA	NA	NA	NA	NA	NA	NA	NA	NA	NA
		0.995551	0.995551	0.995551	0.995551	0.997433	0.997433	0.997433	0.997433	0.999014	0.999014	0.999014	0.999014	0.995551	0.995551	0.995551	0.995551	0.997433	0.997433	0.997433	0.997433	0.999014	0.999014	0.999014	0.999014	0.995551	0.995551	0.995551	0.995551	0.997433	0.997433	0.997433	0.997433	0.999014	0.999014	0.999014	0.999014	0.995551	0.995551	0.995551	0.995551	0.997433	0.997433	0.997433	0.997433	0.999014	0.999014	0.999014	0.999014
		1	1	1	1	1	1	1	1	1	1	1	1	1	1	1	1	1	1	1	1	1	1	1	1	1	1	1	1	1	1	1	1	1	1	1	1	1	1	1	1	1	1	1	1	1	1	1	1
		NA	NA	NA	NA	NA	NA	NA	NA	NA	NA	NA	NA	NA	NA	NA	NA	NA	NA	NA	NA	NA	NA	NA	NA	NA	NA	NA	NA	NA	NA	NA	NA	NA	NA	NA	NA	NA	NA	NA	NA	NA	NA	NA	NA	NA	NA	NA	NA
		1.54105e-25	2.79946e-40	6.87003e-61	4.94965e-81	2.17937e-27	2.57271e-42	9.39792e-61	2.13261e-80	6.69182e-24	4.3255e-38	4.94071e-49	1.35797e-59	5.13893e-16	5.0994e-27	5.43921e-41	1.13603e-54	6.84691e-20	6.10487e-32	1.07389e-47	3.43412e-61	8.56463e-17	3.87759e-28	1.23515e-36	5.51566e-43	3.2022e-20	2.7256e-33	1.64443e-49	9.3997e-65	8.79655e-23	1.059e-37	7.76018e-57	6.57485e-73	2.76212e-20	3.59286e-33	1.54092e-46	2.81194e-54	2.28798e-24	6.89951e-41	1.35885e-58	2.18936e-76	6.60843e-27	1.16285e-45	8.94662e-63	9.96097e-80	5.48016e-24	3.3461e-39	9.62907e-51	1.94646e-64
		5.51638e-18	5.49632e-23	1.31818e-25	8.50532e-27	1.98974e-16	3.41216e-24	4.55916e-24	4.31684e-27	7.03706e-19	3.91437e-22	8.65344e-30	2.35816e-29	5.40453e-20	2.99704e-25	2.31809e-29	5.32496e-32	8.75066e-17	1.20631e-24	1.50303e-24	3.82747e-29	1.44141e-19	2.0135e-22	3.91619e-30	4.98842e-32	1.20628e-15	1.33525e-19	2.10589e-23	3.56605e-26	2.22311e-13	2.5945e-19	1.46906e-18	2.26929e-22	9.54882e-16	1.14035e-17	7.62421e-23	8.54483e-25	2.57577e-11	7.47462e-14	3.10415e-18	3.67167e-20	1.77859e-08	1.15022e-12	1.72113e-13	9.18989e-19	1.6769e-10	4.73787e-12	9.8615e-18	6.84347e-18
		NA	NA	NA	NA	NA	NA	NA	NA	NA	NA	NA	NA	NA	NA	NA	NA	NA	NA	NA	NA	NA	NA	NA	NA	NA	NA	NA	NA	NA	NA	NA	NA	NA	NA	NA	NA	NA	NA	NA	NA	NA	NA	NA	NA	NA	NA	NA	NA
		0.999033	0.999033	0.999033	0.999033	0.999478	0.999478	0.999478	0.999478	0.984171	0.984171	0.984171	0.984171	0.999033	0.999033	0.999033	0.999033	0.999478	0.999478	0.999478	0.999478	0.984171	0.984171	0.984171	0.984171	0.999033	0.999033	0.999033	0.999033	0.999478	0.999478	0.999478	0.999478	0.984171	0.984171	0.984171	0.984171	0.999033	0.999033	0.999033	0.999033	0.999478	0.999478	0.999478	0.999478	0.984171	0.984171	0.984171	0.984171
		1	1	1	1	1	1	1	1	1	1	1	1	1	1	1	1	1	1	1	1	1	1	1	1	1	1	1	1	1	1	1	1	1	1	1	1	1	1	1	1	1	1	1	1	1	1	1	1
		NA	NA	NA	NA	NA	NA	NA	NA	NA	NA	NA	NA	NA	NA	NA	NA	NA	NA	NA	NA	NA	NA	NA	NA	NA	NA	NA	NA	NA	NA	NA	NA	NA	NA	NA	NA	NA	NA	NA	NA	NA	NA	NA	NA	NA	NA	NA	NA
		2.29049e-14	3.23948e-39	6.57639e-81	1.27987e-141	1.71398e-10	4.25002e-22	1.33614e-58	8.10157e-112	2.35593e-11	1.30365e-29	2.28121e-59	7.98793e-109	4.9221e-13	1.13369e-35	2.47981e-77	3.69073e-141	3.44537e-09	4.71443e-20	1.23666e-55	3.63247e-115	1.39188e-09	8.49129e-27	1.99266e-57	2.42147e-113	1.93801e-12	2.63051e-34	4.53852e-74	6.65756e-138	9.25777e-09	7.40509e-19	4.27229e-53	1.04196e-111	3.12131e-09	4.18953e-27	7.85187e-58	9.68856e-113	2.61875e-12	2.67715e-34	2.1625e-73	2.18291e-133	9.3731e-09	8.51274e-19	2.93218e-53	1.49243e-110	1.08974e-09	9.90622e-29	3.7427e-59	1.24233e-116
		3.45632e-07	5.0776e-08	2.32621e-08	6.95573e-09	2.16958e-05	4.38945e-05	4.80352e-07	1.1963e-06	0.00438107	0.0567666	0.0135442	0.0524357	2.14863e-06	9.36332e-07	3.35265e-07	3.52002e-08	0.000179346	0.000614462	6.22734e-06	4.145e-06	0.0378217	0.233933	0.0478241	0.0507417	5.0946e-06	2.98627e-06	2.17925e-06	1.45232e-07	0.000366479	0.00202285	3.24214e-05	1.96613e-05	0.0561955	0.203674	0.0407769	0.0413826	6.17968e-06	3.0058e-06	3.21784e-06	1.83075e-07	0.000369788	0.00214669	2.91726e-05	1.72843e-05	0.0334638	0.0914633	0.0237426	0.0132938
		NA	NA	NA	NA	NA	NA	NA	NA	NA	NA	NA	NA	NA	NA	NA	NA	NA	NA	NA	NA	NA	NA	NA	NA	NA	NA	NA	NA	NA	NA	NA	NA	NA	NA	NA	NA	NA	NA	NA	NA	NA	NA	NA	NA	NA	NA	NA	NA
		0.997896	0.997896	0.997896	0.997896	0.996388	0.996388	0.996388	0.996388	0.986273	0.986273	0.986273	0.986273	0.997896	0.997896	0.997896	0.997896	0.996388	0.996388	0.996388	0.996388	0.986273	0.986273	0.986273	0.986273	0.997896	0.997896	0.997896	0.997896	0.996388	0.996388	0.996388	0.996388	0.986273	0.986273	0.986273	0.986273	0.997896	0.997896	0.997896	0.997896	0.996388	0.996388	0.996388	0.996388	0.986273	0.986273	0.986273	0.986273
		1	1	1	1	1	1	1	1	1	1	1	1	1	1	1	1	1	1	1	1	1	1	1	1	1	1	1	1	1	1	1	1	1	1	1	1	1	1	1	1	1	1	1	1	1	1	1	1
		NA	NA	NA	NA	NA	NA	NA	NA	NA	NA	NA	NA	NA	NA	NA	NA	NA	NA	NA	NA	NA	NA	NA	NA	NA	NA	NA	NA	NA	NA	NA	NA	NA	NA	NA	NA	NA	NA	NA	NA	NA	NA	NA	NA	NA	NA	NA	NA
		1.06154e-51	2.35585e-83	2.67065e-105	7.62101e-161	9.39744e-53	2.69263e-79	3.60922e-102	1.63464e-155	5.01924e-54	2.67958e-84	1.59013e-110	3.86438e-147	2.53453e-50	1.71147e-78	1.05094e-100	8.29306e-153	1.20067e-51	8.36602e-75	4.04933e-98	1.92506e-152	8.35011e-52	2.61381e-77	7.15623e-104	9.69292e-144	1.0132e-46	2.32194e-71	3.213e-95	1.02778e-148	6.36232e-48	1.66901e-68	3.60632e-91	4.7826e-147	1.79027e-49	3.74989e-73	7.12316e-100	1.14253e-140	3.19568e-46	1.20564e-69	1.94143e-92	4.17819e-142	1.50448e-47	8.22574e-67	7.17167e-91	1.69614e-139	7.40513e-46	8.47845e-71	1.12943e-99	4.96578e-139
		0.128867	0.409645	0.614447	0.705171	0.118981	0.388506	0.756372	0.235411	0.119534	0.29262	0.648021	0.4431	0.163345	0.755177	0.400852	0.327037	0.133791	0.852941	0.416841	0.176501	0.135602	0.632369	0.661606	0.458342	0.168333	0.813987	0.61703	0.79173	0.142547	0.831393	0.582426	0.581746	0.178486	0.668758	0.705454	0.658869	0.08471	0.594829	0.69382	0.621229	0.0657982	0.474947	0.673279	0.68509	0.110414	0.269875	0.195186	0.631179
		NA	NA	NA	NA	NA	NA	NA	NA	NA	NA	NA	NA	NA	NA	NA	NA	NA	NA	NA	NA	NA	NA	NA	NA	NA	NA	NA	NA	NA	NA	NA	NA	NA	NA	NA	NA	NA	NA	NA	NA	NA	NA	NA	NA	NA	NA	NA	NA
		NA	NA	NA	NA	NA	NA	NA	NA	NA	NA	NA	NA	NA	NA	NA	NA	NA	NA	NA	NA	NA	NA	NA	NA	NA	NA	NA	NA	NA	NA	NA	NA	NA	NA	NA	NA	NA	NA	NA	NA	NA	NA	NA	NA	NA	NA	NA	NA
		NA	NA	NA	NA	NA	NA	NA	NA	NA	NA	NA	NA	NA	NA	NA	NA	NA	NA	NA	NA	NA	NA	NA	NA	NA	NA	NA	NA	NA	NA	NA	NA	NA	NA	NA	NA	NA	NA	NA	NA	NA	NA	NA	NA	NA	NA	NA	NA
		NA	NA	NA	NA	NA	NA	NA	NA	NA	NA	NA	NA	NA	NA	NA	NA	NA	NA	NA	NA	NA	NA	NA	NA	NA	NA	NA	NA	NA	NA	NA	NA	NA	NA	NA	NA	NA	NA	NA	NA	NA	NA	NA	NA	NA	NA	NA	NA
		5.75983e-193	1.21259e-214	1.59761e-248	8.61627e-298	1.93817e-133	1.36103e-182	1.86575e-178	1.07689e-199	2.67632e-77	2.17145e-110	6.95103e-175	1.5401e-221	8.71845e-171	1.75706e-187	1.82367e-214	3.86719e-253	7.32386e-115	5.91096e-155	4.4337e-161	1.42167e-179	1.72638e-69	3.42027e-99	1.01852e-151	2.02535e-189	2.12707e-152	1.40637e-173	2.12543e-198	6.54345e-233	2.36246e-114	1.277e-148	4.68538e-153	2.87742e-169	1.28634e-67	5.56281e-97	1.7688e-142	4.75139e-179	5.29186e-141	9.28338e-171	2.39806e-216	2.49759e-275	2.95488e-106	1.75444e-135	1.13989e-141	6.08478e-159	1.11884e-63	1.35056e-92	7.64671e-141	1.5737e-177
		0.0446593	0.000434845	0.00467686	1.01604e-07	2.35797e-05	8.24263e-06	1.01885e-12	1.52398e-13	0.327797	0.337001	0.0834544	0.00264891	0.240622	0.0443258	0.00148601	1.89908e-09	0.000397535	1.05132e-05	1.34364e-10	8.22678e-12	0.446268	0.46959	0.0487464	0.00345379	0.911965	0.828099	0.100317	0.000203612	0.0098251	0.000288718	2.59246e-06	1.99201e-07	0.643002	0.675048	0.0446512	0.000403076	0.0075493	0.00906237	0.00874449	0.0180957	0.0334293	0.0177624	0.00463894	0.00976025	0.817834	0.916902	0.21295	0.017802
		NA	NA	NA	NA	NA	NA	NA	NA	NA	NA	NA	NA	NA	NA	NA	NA	NA	NA	NA	NA	NA	NA	NA	NA	NA	NA	NA	NA	NA	NA	NA	NA	NA	NA	NA	NA	NA	NA	NA	NA	NA	NA	NA	NA	NA	NA	NA	NA
		NA	NA	NA	NA	0	0	NA	NA	0	0	0	0	NA	NA	NA	NA	0	0	NA	NA	0	0	0	0	NA	NA	NA	NA	NA	NA	NA	NA	NA	NA	NA	NA	NA	NA	NA	NA	NA	NA	NA	NA	NA	NA	NA	NA
		NA	NA	NA	NA	0.0538918	0.0362048	NA	NA	0.0419457	0.0419194	0.033747	0.0144873	NA	NA	NA	NA	0.0305961	0.0297432	NA	NA	0.0238001	0.0194093	0.01302	0.0108799	NA	NA	NA	NA	NA	NA	NA	NA	NA	NA	NA	NA	NA	NA	NA	NA	NA	NA	NA	NA	NA	NA	NA	NA
		NA	NA	NA	NA	NA	NA	NA	NA	NA	NA	NA	NA	NA	NA	NA	NA	NA	NA	NA	NA	NA	NA	NA	NA	NA	NA	NA	NA	NA	NA	NA	NA	NA	NA	NA	NA	NA	NA	NA	NA	NA	NA	NA	NA	NA	NA	NA	NA
		0.989833	1.03642e-17	2.641e-14	0.000139951	0.991973	0.991973	1.09018e-18	2.31677e-12	0.993493	0.993493	4.38073e-18	7.07754e-20	0.989833	8.86239e-19	2.75074e-13	5.10922e-05	0.991973	0.991973	4.2619e-19	3.21762e-12	0.993493	0.993493	5.45897e-17	2.06718e-19	0.989833	5.08055e-19	3.57598e-13	2.06274e-05	0.991973	0.991973	2.97429e-19	2.36979e-13	0.993493	0.993493	2.10105e-17	1.29829e-19	0.989833	2.82238e-19	1.69304e-12	1.20684e-05	0.991973	0.991973	4.09412e-19	2.86045e-13	0.993493	0.993493	1.65072e-17	5.44365e-20
		1	0.276048	0.61998	0.677927	1	1	0.576682	0.619761	1	1	0.23504	0.000201183	1	0.865605	0.96483	0.811029	1	1	0.824173	0.602067	1	1	0.894374	0.000355952	1	0.993181	0.797455	0.643033	1	1	0.957803	0.495391	1	1	0.590212	0.00022699	1	0.798452	0.642297	0.66114	1	1	0.820459	0.685165	1	1	0.372553	9.33558e-05
		NA	NA	NA	NA	NA	NA	NA	NA	NA	NA	NA	NA	NA	NA	NA	NA	NA	NA	NA	NA	NA	NA	NA	NA	NA	NA	NA	NA	NA	NA	NA	NA	NA	NA	NA	NA	NA	NA	NA	NA	NA	NA	NA	NA	NA	NA	NA	NA
		5.38175e-248	1.75598e-276	5.28792e-290	0	0	0	0	0	9.3152e-164	2.73332e-212	5.07917e-238	4.19564e-284	3.44378e-169	6.06217e-193	1.89508e-207	5.54822e-265	1.149e-275	0	0	0	2.29212e-125	1.4172e-162	4.40731e-189	2.72577e-208	6.17799e-166	3.58653e-163	1.0187e-165	2.60531e-214	2.22396e-266	1.03261e-291	0	0	1.145e-104	7.68071e-142	4.63122e-181	1.20578e-195	2.96726e-132	5.63991e-112	2.75552e-104	1.40644e-115	3.22571e-207	2.58127e-218	1.24745e-246	9.43197e-282	6.98272e-93	4.6338e-130	1.62188e-163	1.34878e-166
		0.0545906	0.795958	0.934004	0.978024	0.00193035	0.0316368	0.000699052	1.8628e-07	0.0738319	0.0198374	0.0744617	0.00554458	0.00763504	3.11051e-05	1.78585e-07	1.80446e-07	0.293195	0.00265612	0.307753	0.378942	0.534363	0.690811	0.561633	0.870587	0.0010307	4.01403e-08	1.19689e-16	1.47242e-15	0.354136	0.00407424	0.0078018	2.82891e-06	0.0282482	0.133957	0.146918	0.0131247	7.16665e-08	2.71941e-18	1.36991e-24	4.89768e-29	0.00509886	8.51109e-05	5.30787e-05	0.000331787	0.00372815	0.0419589	0.0326569	0.000231289
		NA	NA	NA	NA	NA	NA	NA	NA	NA	NA	NA	NA	NA	NA	NA	NA	NA	NA	NA	NA	NA	NA	NA	NA	NA	NA	NA	NA	NA	NA	NA	NA	NA	NA	NA	NA	NA	NA	NA	NA	NA	NA	NA	NA	NA	NA	NA	NA
		0.994184	0.994184	0.994184	0.994184	0.999259	0.999259	0.999259	0.999259	0.990927	0.990927	0.990927	0.990927	0.994184	0.994184	0.994184	0.994184	0.999259	0.999259	0.999259	0.999259	0.990927	0.990927	0.990927	0.990927	0.994184	0.994184	0.994184	0.994184	0.999259	0.999259	0.999259	0.999259	0.990927	0.990927	0.990927	0.990927	0.994184	0.994184	0.994184	0.994184	0.999259	0.999259	0.999259	0.999259	0.990927	0.990927	0.990927	0.990927
		1	1	1	1	1	1	1	1	1	1	1	1	1	1	1	1	1	1	1	1	1	1	1	1	1	1	1	1	1	1	1	1	1	1	1	1	1	1	1	1	1	1	1	1	1	1	1	1
		NA	NA	NA	NA	NA	NA	NA	NA	NA	NA	NA	NA	NA	NA	NA	NA	NA	NA	NA	NA	NA	NA	NA	NA	NA	NA	NA	NA	NA	NA	NA	NA	NA	NA	NA	NA	NA	NA	NA	NA	NA	NA	NA	NA	NA	NA	NA	NA
		0.995519	0.995519	0.995519	0.995519	0.991375	0.991375	0.997753	0.997753	0.999334	0.999334	0.998934	0.998934	0.995519	0.995519	0.995519	0.995519	0.991375	0.991375	0.997753	0.997753	0.999334	0.999334	0.998934	0.998934	0.995519	0.995519	0.995519	0.995519	0.991375	0.991375	0.997753	0.997753	0.999334	0.999334	0.998934	0.998934	0.995519	0.995519	0.995519	0.995519	0.991375	0.991375	0.997753	0.997753	0.999334	0.999334	0.998934	0.998934
		1	1	1	1	1	1	1	1	1	1	1	1	1	1	1	1	1	1	1	1	1	1	1	1	1	1	1	1	1	1	1	1	1	1	1	1	1	1	1	1	1	1	1	1	1	1	1	1
		NA	NA	NA	NA	NA	NA	NA	NA	NA	NA	NA	NA	NA	NA	NA	NA	NA	NA	NA	NA	NA	NA	NA	NA	NA	NA	NA	NA	NA	NA	NA	NA	NA	NA	NA	NA	NA	NA	NA	NA	NA	NA	NA	NA	NA	NA	NA	NA
		0	0	1.13862e-295	0	3.6115e-267	1.55623e-295	0	0	2.14371e-203	9.27368e-243	1.19502e-230	3.85106e-280	0	0	0	9.7682e-297	0	0	0	0	1.69384e-257	3.99382e-299	2.51631e-304	0	0	0	0	0	0	0	0	0	0	0	0	0	0	0	0	0	0	0	0	0	0	0	0	0
		0.0448932	0.0745326	0.710009	0.36828	0.997634	0.358422	0.0316901	0.000747616	0.157044	0.339345	0.161332	0.223607	0.00270521	0.00578043	0.117696	0.470845	0.123237	0.199109	0.0822605	0.0125527	0.528865	0.649397	0.787227	0.751682	6.67973e-07	4.98104e-05	0.000828553	0.000582686	0.000593636	6.41448e-05	4.69142e-06	6.47143e-09	0.189346	0.723298	0.084248	6.44988e-05	1.55182e-21	9.80806e-18	2.28736e-17	8.4472e-22	4.10117e-10	1.41568e-17	1.78883e-18	9.52153e-22	0.03931	0.538311	0.0603559	2.56664e-08
		NA	NA	NA	NA	NA	NA	NA	NA	NA	NA	NA	NA	NA	NA	NA	NA	NA	NA	NA	NA	NA	NA	NA	NA	NA	NA	NA	NA	NA	NA	NA	NA	NA	NA	NA	NA	NA	NA	NA	NA	NA	NA	NA	NA	NA	NA	NA	NA
		8.66147e-06	0.0727971	0.471407	0.000324606	2.03979e-09	0.00654341	0.683384	0.0108963	5.14064e-09	0.0225853	0.917285	0.00446211	1.29751e-05	0.10711	0.351826	0.000407984	3.33488e-09	0.00951577	0.880718	0.0125761	8.30364e-09	0.0238925	0.846674	0.00441829	2.48488e-05	0.145025	0.269304	0.000384265	9.63222e-09	0.0145055	0.986526	0.0180848	1.87609e-08	0.0350207	0.73716	0.00496685	6.68314e-05	0.179264	0.399734	0.00151835	2.11804e-08	0.0322766	0.886177	0.0136095	3.51667e-08	0.0565298	0.840848	0.00437171
		1.3966e-14	5.88399e-11	1.18482e-08	1.0694e-09	7.78049e-17	2.28336e-12	2.89883e-10	6.89795e-12	4.0493e-17	3.72431e-11	1.52073e-09	4.73746e-11	4.74051e-14	1.91608e-10	1.38298e-08	9.71569e-11	2.95377e-16	4.45962e-12	5.94692e-10	1.49087e-13	1.52471e-16	4.75141e-11	1.19889e-08	6.67465e-12	3.36982e-13	9.49756e-10	1.59332e-07	3.74524e-10	5.12081e-15	2.56291e-11	8.52784e-09	5.44525e-13	1.43152e-15	2.52372e-10	4.27239e-08	1.69456e-11	6.6026e-12	2.99484e-09	6.70891e-08	5.29824e-11	4.15726e-14	7.53982e-10	2.69855e-08	1.51658e-12	7.93811e-15	2.12496e-09	2.589e-08	5.02626e-11
		NA	NA	NA	NA	NA	NA	NA	NA	NA	NA	NA	NA	NA	NA	NA	NA	NA	NA	NA	NA	NA	NA	NA	NA	NA	NA	NA	NA	NA	NA	NA	NA	NA	NA	NA	NA	NA	NA	NA	NA	NA	NA	NA	NA	NA	NA	NA	NA
		5.85313e-05	5.42835e-32	1.99971e-100	4.8546e-173	3.88279e-18	2.66802e-34	5.08951e-50	8.66612e-93	1.58839e-23	3.68086e-42	3.64882e-62	4.15219e-78	5.7261e-05	1.1312e-28	2.26502e-92	8.51154e-181	1.64595e-17	1.65962e-34	2.22749e-48	1.02014e-90	3.09443e-23	1.12372e-37	3.0719e-54	2.10001e-70	1.57076e-05	3.13048e-28	2.40552e-97	8.1889e-194	2.20919e-16	1.54928e-36	4.49659e-47	9.97388e-99	5.91232e-22	2.55432e-35	1.46428e-52	3.42503e-63	1.74978e-07	2.76455e-40	1.679e-136	1.17516e-292	1.53045e-16	7.33968e-37	2.19979e-57	5.615e-123	7.20363e-20	5.16188e-36	6.23262e-53	1.08339e-63
		0.168859	0.68887	0.0187479	0.000223704	0.281009	0.559378	0.304646	0.183007	0.361641	0.519139	0.236886	0.0574389	0.115094	0.626612	0.0694818	6.55743e-05	0.275811	0.105289	0.0700706	0.161915	0.429303	0.643861	0.539682	0.160187	0.0476122	0.137	0.414233	0.000896282	0.965428	0.821473	0.612551	0.0810743	0.301404	0.144992	0.0656475	0.0298648	0.00478834	0.242892	0.183677	1.42979e-07	0.0680205	0.0306975	0.217901	0.712326	0.998257	0.546646	0.20994	0.57444
		NA	NA	NA	NA	NA	NA	NA	NA	NA	NA	NA	NA	NA	NA	NA	NA	NA	NA	NA	NA	NA	NA	NA	NA	NA	NA	NA	NA	NA	NA	NA	NA	NA	NA	NA	NA	NA	NA	NA	NA	NA	NA	NA	NA	NA	NA	NA	NA
		0.995317	0.995317	0.995317	0.995317	0.9975	0.9975	0.9975	0.9975	0.991886	0.991886	0.991886	0.991886	0.995317	0.995317	0.995317	0.995317	0.9975	0.9975	0.9975	0.9975	0.991886	0.991886	0.991886	0.991886	0.995317	0.995317	0.995317	0.995317	0.9975	0.9975	0.9975	0.9975	0.991886	0.991886	0.991886	0.991886	0.995317	0.995317	0.995317	0.995317	0.9975	0.9975	0.9975	0.9975	0.991886	0.991886	0.991886	0.991886
		1	1	1	1	1	1	1	1	1	1	1	1	1	1	1	1	1	1	1	1	1	1	1	1	1	1	1	1	1	1	1	1	1	1	1	1	1	1	1	1	1	1	1	1	1	1	1	1
		NA	NA	NA	NA	NA	NA	NA	NA	NA	NA	NA	NA	NA	NA	NA	NA	NA	NA	NA	NA	NA	NA	NA	NA	NA	NA	NA	NA	NA	NA	NA	NA	NA	NA	NA	NA	NA	NA	NA	NA	NA	NA	NA	NA	NA	NA	NA	NA
		3.22901e-197	1.24025e-192	2.2032e-207	9.7941e-204	1.77652e-190	8.70323e-178	3.43526e-191	5.11149e-205	5.144e-196	7.04094e-188	2.7435e-188	4.06095e-184	1.38467e-252	2.98932e-287	5.00868e-292	0	2.51888e-266	0	0	0	1.55731e-252	7.7547e-299	0	0	2.28732e-122	1.51507e-155	2.41862e-141	2.44329e-115	1.8454e-81	8.81926e-59	3.47722e-41	7.66648e-82	7.50989e-145	6.68409e-194	3.55769e-184	1.04125e-220	5.41132e-188	2.34779e-174	3.3014e-166	1.07985e-149	1.24237e-170	2.70096e-147	2.94422e-181	5.90241e-177	9.80647e-198	9.8128e-225	4.02773e-235	1.56059e-246
		1.38803e-27	1.11446e-32	1.45707e-27	1.10257e-28	1.39753e-29	2.43452e-30	2.41431e-32	2.08958e-25	8.53772e-29	1.41165e-36	4.44112e-35	2.07112e-33	5.50692e-14	3.3799e-14	6.12584e-18	6.44839e-08	3.65487e-17	2.9973e-09	2.71709e-11	0.214329	1.0748e-18	1.84092e-23	8.40027e-15	8.72728e-13	3.06892e-42	5.11345e-23	2.01029e-25	1.4387e-29	1.90114e-71	6.96993e-66	1.40315e-59	4.6997e-35	4.00469e-50	1.13159e-43	9.64674e-32	1.04834e-28	1.75792e-26	8.41611e-34	8.48137e-34	6.2385e-37	1.61331e-45	2.59401e-50	4.26982e-40	1.01915e-46	1.16358e-29	4.20131e-27	1.56928e-22	1.04811e-26
		NA	NA	NA	NA	NA	NA	NA	NA	NA	NA	NA	NA	NA	NA	NA	NA	NA	NA	NA	NA	NA	NA	NA	NA	NA	NA	NA	NA	NA	NA	NA	NA	NA	NA	NA	NA	NA	NA	NA	NA	NA	NA	NA	NA	NA	NA	NA	NA
		3.31139e-240	9.10624e-254	2.13995e-281	1.1487e-284	2.18969e-211	5.72143e-221	6.68171e-219	8.99125e-270	1.84119e-224	8.98936e-252	1.18456e-238	1.23502e-253	1.0488e-280	2.12614e-302	0	0	2.16971e-260	5.72878e-269	7.60775e-252	0	2.00325e-260	1.19932e-272	7.75534e-285	6.34125e-307	0	0	0	0	1.71274e-285	7.46229e-296	0	0	3.60494e-260	1.80625e-293	0	0	0	0	0	0	1.85298e-281	9.41893e-288	0	0	2.5499e-242	7.92259e-271	0	0
		0.498589	0.031112	0.0565223	0.00613028	0.173749	0.00557202	0.000381294	0.0444734	0.259263	0.447822	0.0298744	0.00111276	0.172767	0.924432	0.23971	0.593508	0.900156	0.243106	0.00631309	0.0889048	0.830126	0.397875	0.24996	0.0358215	0.00164623	0.0865896	0.00706173	0.000220254	0.509746	0.107408	0.182914	0.54328	0.960922	0.256325	0.567676	0.0507954	0.00125107	6.40217e-05	1.61149e-06	2.8952e-11	0.103132	0.782697	0.333711	0.000931391	0.821898	0.57874	0.36465	0.0161361
		NA	NA	NA	NA	NA	NA	NA	NA	NA	NA	NA	NA	NA	NA	NA	NA	NA	NA	NA	NA	NA	NA	NA	NA	NA	NA	NA	NA	NA	NA	NA	NA	NA	NA	NA	NA	NA	NA	NA	NA	NA	NA	NA	NA	NA	NA	NA	NA
		0	0	0	0	0	0	0	0	4.62761e-302	0	0	0	0	0	0	0	0	0	0	0	4.52112e-299	0	0	0	9.29986e-289	5.46077e-278	2.54102e-299	0	1.43774e-301	4.82346e-306	0	0	1.20449e-286	0	0	0	3.38067e-281	1.2612e-273	2.3209e-283	0	7.10778e-289	1.36397e-293	6.82273e-308	0	3.03615e-270	4.91516e-286	1.11501e-297	0
		7.52845e-08	3.67203e-13	2.39843e-14	1.2848e-15	8.86261e-07	1.38412e-06	2.01794e-05	4.67121e-07	1.76407e-09	1.92005e-07	0.000338625	0.0350433	3.88927e-09	3.86533e-15	1.57883e-17	1.96319e-20	1.91289e-06	1.36784e-06	2.32595e-06	5.02076e-08	9.78015e-09	6.46497e-08	4.20531e-05	0.00707217	1.23145e-14	1.48075e-21	8.77195e-21	1.37104e-21	1.9642e-07	2.62817e-09	1.96892e-10	6.85357e-11	1.36212e-08	2.1316e-08	4.64643e-08	5.12797e-07	7.68688e-13	6.92492e-18	2.22998e-19	3.92256e-18	5.0857e-05	2.23537e-09	1.32774e-11	7.25266e-12	0.0029794	0.00266123	8.58767e-07	2.59053e-09
		NA	NA	NA	NA	NA	NA	NA	NA	NA	NA	NA	NA	NA	NA	NA	NA	NA	NA	NA	NA	NA	NA	NA	NA	NA	NA	NA	NA	NA	NA	NA	NA	NA	NA	NA	NA	NA	NA	NA	NA	NA	NA	NA	NA	NA	NA	NA	NA
		0	0	0	0	0	0	0	0	0	0	0	0	0	0	0	0	0	0	0	0	0	0	0	0	0	0	0	0	0	0	0	0	0	0	0	0	0	0	0	0	0	0	0	0	0	0	0	0
		3.64398e-15	4.14842e-14	2.55746e-12	2.4381e-09	4.89406e-15	5.22397e-13	1.71575e-14	2.73139e-16	4.28417e-14	1.43096e-14	4.91613e-13	3.09907e-15	8.65381e-16	2.3908e-15	3.61601e-13	1.75673e-07	6.18177e-14	1.10956e-12	1.82549e-14	1.38381e-15	5.46961e-14	6.18082e-15	1.989e-13	6.72541e-16	1.45568e-16	7.24349e-15	1.27479e-13	2.41085e-09	6.23131e-13	8.11919e-11	1.27747e-14	7.73369e-16	4.05606e-13	5.61924e-15	3.36873e-13	6.56842e-14	2.70601e-15	2.36189e-14	1.88182e-12	1.28947e-13	1.22677e-10	1.04422e-07	6.67701e-11	3.83439e-14	8.37779e-13	8.35487e-15	6.12306e-13	2.92496e-14
		NA	NA	NA	NA	NA	NA	NA	NA	NA	NA	NA	NA	NA	NA	NA	NA	NA	NA	NA	NA	NA	NA	NA	NA	NA	NA	NA	NA	NA	NA	NA	NA	NA	NA	NA	NA	NA	NA	NA	NA	NA	NA	NA	NA	NA	NA	NA	NA
		0	0	0	0	0	0	0	0	0	0	0	0	0	0	0	0	0	0	0	0	0	0	0	0	0	0	0	0	0	0	0	0	0	0	0	0	0	0	0	0	0	0	0	0	0	0	0	0
		0.0928831	0.376684	0.206246	0.488449	0.391553	0.496728	0.342187	0.828894	0.254065	0.571813	0.103875	0.659515	0.000802709	0.200677	0.246211	0.355719	0.463708	0.368654	0.799945	0.433957	0.0042854	0.0100625	0.0183233	0.119738	6.65102e-12	1.09042e-09	1.14757e-07	8.17151e-06	2.48024e-08	3.05271e-09	2.99354e-08	3.6135e-07	5.13599e-05	2.88703e-06	3.61436e-07	3.21847e-06	2.78953e-15	6.80688e-18	7.4739e-18	6.17583e-12	3.57849e-12	2.98041e-15	7.32314e-14	1.4238e-10	0.000100701	3.95683e-05	1.1006e-05	0.000127567
		NA	NA	NA	NA	NA	NA	NA	NA	NA	NA	NA	NA	NA	NA	NA	NA	NA	NA	NA	NA	NA	NA	NA	NA	NA	NA	NA	NA	NA	NA	NA	NA	NA	NA	NA	NA	NA	NA	NA	NA	NA	NA	NA	NA	NA	NA	NA	NA
		0	0	0	0	0	0	0	0	0	0	0	0	0	0	0	0	0	0	0	0	0	0	0	0	0	1.29314e-271	1.10153e-272	2.09032e-261	3.30729e-287	4.26181e-243	1.05696e-153	1.81759e-115	1.99231e-267	6.16849e-245	3.38127e-187	5.99787e-141	1.1637e-197	8.06434e-186	4.5693e-175	2.52212e-160	1.28904e-138	7.11003e-128	1.90522e-106	1.77653e-111	3.02404e-138	9.25928e-114	1.54487e-78	3.38757e-56
		1.91794e-07	0.00249524	0.000532105	0.18558	4.76428e-05	2.32794e-05	0.0412752	0.0145113	0.77089	0.00266117	0.14756	0.207304	2.09484e-07	0.038788	0.271371	0.933201	6.05013e-05	0.0624624	0.331396	0.693859	0.223897	0.273411	0.204553	0.983818	0.169835	5.13653e-07	8.21706e-05	1.31934e-05	0.465204	0.0159816	9.69272e-20	5.2725e-39	0.0351398	0.00040074	9.49474e-19	6.67328e-41	5.47402e-07	3.95733e-17	9.37178e-26	8.6065e-30	1.53155e-16	1.01967e-17	5.52145e-33	1.06661e-31	1.66254e-16	2.78754e-24	2.65923e-41	7.22965e-53
		NA	NA	NA	NA	NA	NA	NA	NA	NA	NA	NA	NA	NA	NA	NA	NA	NA	NA	NA	NA	NA	NA	NA	NA	NA	NA	NA	NA	NA	NA	NA	NA	NA	NA	NA	NA	NA	NA	NA	NA	NA	NA	NA	NA	NA	NA	NA	NA
		1.3355e-237	3.92769e-204	1.24359e-223	2.75422e-240	4.28091e-236	1.16406e-237	2.16846e-280	0	9.077e-240	1.07569e-284	3.64899e-305	0	2.40879e-284	0	0	0	5.90528e-261	0	0	0	3.45416e-290	0	0	0	1.95393e-220	1.64973e-270	0	0	5.80163e-218	4.67094e-296	0	0	2.22586e-295	0	0	0	8.64023e-221	6.2445e-274	0	0	1.22505e-125	2.53851e-154	4.92867e-201	1.23504e-230	1.46484e-238	0	0	0
		0.328493	0.0759397	0.0143255	0.000693948	0.0017828	0.178161	0.393338	0.489561	0.00106358	0.00142305	0.249142	0.24678	0.871535	0.819732	0.434765	0.882216	0.631593	0.185607	0.0259193	0.00139569	0.0980583	0.00384145	0.000720988	4.92314e-05	0.223891	0.0347436	0.0463489	0.0664147	0.00851428	0.000101888	4.28258e-08	8.44658e-09	0.0372111	0.000601633	0.00204866	0.00112172	0.751563	0.489364	0.170488	0.00168366	9.12183e-09	1.92182e-10	2.60213e-05	0.0018061	0.0926506	0.0518188	0.0535783	0.178956
		NA	NA	NA	NA	NA	NA	NA	NA	NA	NA	NA	NA	NA	NA	NA	NA	NA	NA	NA	NA	NA	NA	NA	NA	NA	NA	NA	NA	NA	NA	NA	NA	NA	NA	NA	NA	NA	NA	NA	NA	NA	NA	NA	NA	NA	NA	NA	NA
Aal	inters	2.02624	2.02291	1.99942	1.9703	2.06312	1.99175	1.80027	1.88488	1.94437	1.81862	1.64984	1.64913	1.9895	1.88143	1.723	1.63825	1.98835	1.82969	1.61259	1.57351	1.95221	1.82715	1.68445	1.5179	1.73428	1.50571	1.37933		1.72832	1.5295	1.24333		1.83629	1.67925	1.46371		1.30045				1.30103			0.77886	1.3596			0.717846
	incidence							1.00335				1.00498	1.00499			1.00342	1.00467			1.00572	1.00628			1.00402	1.00663	1.00342	1.00678	1.0087	1.01238	1.00405	1.00695	1.0114	1.01523		1.00357	1.00697	1.01249	1.00977	1.01199	1.01344	1.01556	1.01003	1.01309	1.01658	1.01951	1.00748	1.01112	1.01435	1.01986
	loglik
Gpy	inters	1.32718	1.67414	1.97491	2.25826	1.47074	1.87128	2.18224	2.68854	1.20672	1.64757	2.15276	2.48257	1.24083	1.57952	1.7892	2.10664	1.34868	1.75357	1.95341	2.45435		1.55708	1.97469	2.41436		1.43566	1.60663	1.88101	1.20825	1.6054	1.76081	2.33267		1.45601	1.82396	2.2166		1.33718	1.48284	1.75576		1.48864	1.58967	2.11064		1.39211	1.73225	2.11103
	incidence															1.00433	1.00565			1.00334	1.00372	1.00397		1.00333	1.00499	1.00601	1.0052	1.00774	1.00892	1.00503	1.00392	1.00666	1.00634	1.00587	1.00446	1.00615	1.00794	1.00798	1.00687	1.00954	1.01044	1.00736	1.00578	1.00892	1.00842	1.00677	1.00547	1.00728	1.00894
	loglik
Lti	inters
	incidence
	loglik
Sci	inters
	incidence
	loglik
Pvo	inters	3.30547	3.30514	3.27087	3.30646	1.44795	1.46271	1.48284	1.45953					3.25028	3.23537	3.21624	3.25487	1.42019	1.43692	1.45084	1.43408					3.20406	3.17802	3.14763	3.21322	1.40532	1.40429	1.41899	1.41979					3.22909	3.23335	3.21907	3.28951	1.39003	1.39408	1.4077	1.41244
	incidence	0.976185	0.972451	0.971461	0.971125	0.94464	0.94508	0.945595	0.959466					0.975029	0.972928	0.970185	0.969387	0.957785	0.957365	0.957196	0.96964					0.970985	0.970196	0.96758	0.96461	0.969766	0.970065	0.969641	0.975642					0.974873	0.973283	0.971321	0.968279
	loglik
Cfi	inters		0.0672454	0.230807	0.509444		0.00415915	0.256329	0.516938			0.0919575	0.369647		0.0450823	0.208636	0.491233		0.00415915	0.260833	0.519031			0.0906132	0.349841		0.0342986	0.20476	0.468914		0.00415915	0.273066	0.521565			0.0895264	0.3462		0.025505	0.192218	0.443383		0.00523767	0.299019	0.5559			0.0888848	0.335999
	incidence								0.904093			1.0263	1.0206								0.911533			1.02919	1.02282											1.03145	1.02347								0.918762			1.03319	1.02454
	loglik
Ccr	inters
	incidence
	loglik
Mca	inters	2.15713	2.61086	3.29051	3.98761	2.20404	2.69873	3.291	3.97379	2.11252	2.56258	2.97618	3.40222	1.85492	2.22961	2.7115	3.19235	1.97698	2.38893	2.89487	3.36687	1.88529	2.26323	2.58297	2.89349	1.97461	2.36684	2.87815	3.37556	2.0424	2.50291	3.05561	3.56081	1.98092	2.36574	2.7877	3.11397	2.07751	2.52984	3.05015	3.57195	2.14047	2.66358	3.14766	3.63523	2.07498	2.49224	2.85545	3.28274
	incidence	1.01084	1.012	1.01264	1.01255	1.01025	1.01239	1.01215	1.01263	1.01118	1.01198	1.01376	1.01345	1.01184	1.01301	1.014	1.01421	1.01068	1.01284	1.01258	1.01346	1.01173	1.01241	1.01424	1.01451	1.01039	1.01137	1.01238	1.01272	1.00949	1.01131	1.01085	1.01169	1.01045	1.01095	1.01226	1.01256	1.00878	1.0095	1.01084	1.01107	1.00735	1.00901	1.00912	1.01066	1.00844	1.00901	1.01084	1.0106
	loglik
Mav	inters
	incidence
	loglik
Dni	inters	1.84589	2.51531	3.29886	4.33152	1.70082	2.0699	2.90998	3.83046	1.71659	2.22613	2.83345	3.66921	1.79592	2.42777	3.23549	4.35022	1.64383	2.01036	2.85232	3.92884	1.64567	2.15645	2.79871	3.76826	1.77302	2.39358	3.17223	4.29342	1.62436	1.97339	2.79826	3.86803	1.63093	2.16417	2.80633	3.74658	1.76794	2.39338	3.15908	4.20862	1.62411	1.9715	2.80175	3.83622	1.65009	2.20457	2.83117	3.80693
	incidence	0.980878	0.981482	0.981799	0.981793	0.985275	0.987693	0.98467	0.986003	0.992564		0.99455		0.983405	0.984717	0.984778	0.983781	0.98792	0.990486	0.987235	0.987582	0.994903		0.995805		0.984502	0.985904	0.986581	0.9851	0.988778	0.991705	0.988738	0.988925			0.995644	0.996074	0.984741	0.985911	0.986944	0.985458	0.988789	0.991766	0.988643	0.98873	0.994762		0.995113	0.995099
	loglik
Sbe	inters
	incidence
	loglik
Hcr	inters	2.50826	3.02568	3.36775	4.26608	2.52968	2.96355	3.33174	4.17753	2.54509	3.0487	3.46185	4.06781	2.47913	2.93334	3.28434	4.12308	2.50627	2.87947	3.25919	4.12204	2.50463	2.92744	3.35177	3.99843	2.41087	2.82115	3.21089	4.08671	2.43563	2.77862	3.15587	4.05515	2.45655	2.85927	3.29411	3.95898	2.41163	2.80733	3.19626	3.99453	2.43932	2.76418	3.17485	3.94958	2.39853	2.84195	3.3148	3.95895
	incidence
	loglik
Cau	inters
	incidence
	loglik
Clu	inters	5.01436	5.49869	6.32821	7.56994	3.90487	4.75546	4.84393	5.38634	2.95213	3.52538	4.61617	5.39712	4.62499	5.00432	5.6368	6.57476	3.62106	4.3222	4.52373	4.9837	2.82828	3.35662	4.29837	4.9614	4.4159	4.85067	5.46193	6.23733	3.62736	4.26021	4.42607	4.81827	2.8068	3.3342	4.17014	4.8054	4.46542	5.13912	6.34176	8.09096	3.52264	4.08321	4.29139	4.70263	2.75604	3.28494	4.12186	4.74868
	incidence	1.00901	1.01518	1.01215	1.01951	1.01937	1.019	1.02653	1.02644				1.0124		1.00991	1.01393	1.02228	1.01728	1.01935	1.02511	1.02556			1.00883	1.01244				1.01588	1.01347	1.01677	1.02019	1.02124			1.00909	1.0147	0.973676	0.974056	0.974546	0.979712	1.01164	1.01215	1.0138	1.01243				1.01061
	loglik
Ala	inters					9.73096	10.9331			10.4954	11.424	11.7884	13.0328					11.6399	11.7599			12.7307	13.6667	15.619	16.55
	incidence						0.978417			0.9867	0.988402	0.987668	0.982634					0.977723	0.977609			0.976731	0.975946	0.974471	0.973832
	loglik
Uar	inters		0.103492	0.331002	0.669043			0.138507	0.401404			0.0532139	0.21668		0.0953917	0.363066	0.64878			0.139318	0.406509			0.0565733	0.233529		0.0990233	0.364106	0.630199			0.137102	0.369529			0.0518442	0.227173		0.101481	0.386025	0.619021			0.150593	0.36927			0.0497567	0.214674
	incidence												1.02061												1.01968												1.0202												1.02122
	loglik
Mlu	inters	6.11078	6.54898	6.7415	7.85997	8.45586	9.25127	10.4237	12.1701	4.34274	5.19713	5.61964	6.69356	4.60591	4.97694	5.27721	6.48175	6.67468	7.43752	8.32615	9.17953	3.64801	4.27689	4.73808	5.07105	4.74097	4.71686	4.87766	6.11279	6.76456	7.3571	8.08332	8.90056	3.35501	3.98927	4.6695	4.99049	4.23941	3.90895	3.87258	4.30585	5.64988	5.99244	6.64665	7.79668	3.18754	3.83024	4.43954	4.60352
	incidence					0.989736	0.993251	0.988525	0.980665		0.991989		0.989552	1.00607	1.00881	1.01103	1.01042		1.00677							1.0062	1.00963	1.01406	1.01291		1.00515	1.00466	1.00818	1.00498			1.00485	1.00967	1.01456	1.01657	1.01738	1.00511	1.00682	1.00676	1.00584	1.00596	1.00408	1.00406	1.00646
	loglik
Mpu	inters
	incidence
	loglik
Mma	inters
	incidence
	loglik
Ggu	inters	11.2219	11.1832	10.4215	11.2986	9.73513	10.4142	11.6309	12.566	7.21851	8.74713	8.35333	9.86229	13.2313	13.6656	12.7431	12.2689	12.7861	13.9698	14.3507	14.6357	9.24563	11.2357	11.5011	11.7601	23.7219	23.399	22.4339	23.5912	18.6252	21.6021	22.7269	23.4481	11.5721	13.4001	14.99	19.1111	36.0607	42.2113	50.8216	61.098	25.9926	34.236	41.3919	43.0955	11.756	13.6559	16.8133	23.9054
	incidence	0.997422						0.997235	0.995599					0.996053	0.996379						0.996521					0.993232	0.994523	0.995552	0.995467	0.995562	0.99462	0.993574	0.991246				0.994533	0.98361	0.984135	0.983267	0.977822	0.991755	0.987913	0.98625	0.983792	1.00259			0.99254
	loglik
Llu	inters	0.620115			1.3516	0.499274	0.76388		1.24395	0.510984	0.80032		1.2754	0.627266			1.34526	0.505558	0.77437		1.23853	0.5173	0.802159		1.27549	0.639071			1.3477	0.519426	0.786948		1.22641	0.52825	0.815056		1.27241	0.65785			1.30816	0.530023	0.812779		1.23659	0.536885			1.27605
	incidence	1.01677	1.01348	1.0115	1.01168	1.01912	1.01468	1.01292	1.01334	1.01909	1.01383	1.01242	1.01266	1.01646	1.01312	1.01142	1.0123	1.0188	1.01447	1.01268	1.01418	1.01877	1.01377	1.01177	1.01312	1.01595	1.01266	1.01065	1.01195	1.01808	1.014	1.01191	1.01394	1.01822	1.0133	1.01137	1.0129	1.01515	1.01232	1.01098	1.0125	1.01754	1.01305	1.01155	1.01369	1.01779	1.01268	1.01156	1.01264
	loglik
Fsi	inters	1.509	2.6929	4.83576	7.16561	2.16244	2.76721	3.23253	4.37379	2.61598	3.38613	4.12792	4.7005	1.50958	2.57476	4.60096	7.37554	2.14763	2.79017	3.20598	4.32534	2.61435	3.23592	3.86206	4.52753	1.55771	2.59227	4.89123	8.41735	2.12872	2.93112	3.30057	4.82244	2.65751	3.33194	4.12129	4.73424	1.69455	3.08116	6.7802	15.1796	2.16444	3.00765	3.79535	5.87556	2.54811	3.40788	4.24082	4.86475
	incidence			0.995657	0.993535												0.992496									1.00426			0.994821								0.995709	1.00566			0.991794		1.0039
	loglik
Lly	inters
	incidence
	loglik
Lpa	inters	9.23417	9.12338	10.0693	10.4639	8.83799	8.96754	10.0133	11.6349	8.27802	8.51671	8.94383	9.34828	12.9023	14.6979	14.7611	21.0055	12.7079	17.9529	21.5335	38.6199	10.8063	13.8137	16.5371	17.9009	10.6746	17.6612	18.7103	16.2276	6.90818	6.50518	6.85457	16.143	9.1691	14.185	19.8105	25.9021	14.291	13.6817	14.028	13.1117	9.03829	8.55996	11.177	11.1056	9.55102	11.2141	12.4416	13.1011
	incidence	1.0124	1.01338	1.01228	1.01252	1.01287	1.01327	1.01373	1.01227	1.01263	1.01443	1.01421	1.01406	1.00897	1.00874	1.01003	1.00614	1.00968	1.00715	1.00812		1.00991	1.0112	1.00877	1.00798	1.0183	1.01376	1.0154	1.01737	1.02431	1.02583	1.03003	1.02235	1.01813	1.01669	1.01636	1.01518	1.01362	1.01535	1.01556	1.01658	1.01671	1.018	1.01584	1.01687	1.01325	1.01238	1.01135	1.01242
	loglik
Hic	inters	6.8649	7.45447	8.46308	8.99341	6.09676	6.554	6.74057	8.69721	6.31595	7.0491	6.99945	7.53809	7.72657	8.50204	9.23376	10.6643	7.16907	7.61104	7.42742	9.39603	7.08436	7.58119	8.00075	8.61893	8.3673	9.63483	11.1874	15.448	7.51483	7.90702	9.36779	12.8831	6.94927	7.77001	9.99982	14.132	8.25665	9.62566	11.4515	14.7949	7.45295	7.73633	9.08406	12.1061	6.60656	7.21349	8.90148	10.5055
	incidence		1.00283		1.0035		1.00358	1.00447	1.00256			1.0028	1.00413							1.00344					1.00267	0.995509		0.996201	0.99446									0.99536	0.994219	0.993	0.989863				0.995584				0.996615
	loglik
Gge	inters	8.98043	8.9399	9.42613	10.4173	8.54869	9.10957	9.85188	10.5205	7.41359	8.38046	9.80022	11.1594	8.70339	8.64787	9.03538	9.8494	8.43312	8.94076	9.54077	10.1828	7.23763	8.0607	9.29535	10.9695	7.24013	7.07797	7.85479	8.89794	7.51462	7.64986	8.13266	8.71633	6.82633	7.50708	8.19209	9.092	7.15821	7.04487	7.45306	8.50252	7.21716	7.27404	7.66655	8.20044	6.51163	6.98327	7.43277	8.07717
	incidence	1.01167	1.01458	1.01491	1.01513	1.01107	1.01068	1.00945	1.01064	1.0133	1.01155	1.00824	1.00504	1.01259	1.01553	1.01629	1.017	1.01083	1.01072	1.01033	1.01139	1.0129	1.01199	1.0093	1.00628	1.016	1.01859	1.01795	1.0178	1.01193	1.01311	1.01355	1.01359	1.01299	1.01254	1.01203	1.01099	1.0152	1.01735	1.01767	1.01679	1.00988	1.01333	1.01434	1.01425	1.00721	1.00713	1.01121	1.01291
	loglik
Rru	inters	9.90196	13.3286	16.4315	21.2151	9.69954	13.4417	15.7801	18.9962	9.10056	11.0999	13.5716	17.605	10.3182	14.3799	17.3649	22.5246	9.99815	13.6645	15.7625	19.7699	9.19478	11.3759	13.9781	20.095	10.4485	13.4727	16.1261	19.8628	9.44019	12.6952	15.2856	18.4684	9.12091	11.5659	14.4557	18.1937	9.48205	12.6694	15.9424	18.7267	8.93315	11.8938	14.4006	16.7209	8.77025	11.0487	13.1783	16.5971
	incidence	0.948327	0.929987	0.916459	0.880705	0.959354	0.958337	0.949552	0.928497	0.966594	0.96238	0.956016	0.929829	0.948315	0.933323	0.922639	0.869662	0.964807	0.961523	0.949998	0.932385	0.968413	0.961978	0.95544	0.917035	0.96019	0.951857	0.943577	0.896936	0.971666	0.9716	0.958762	0.949249	0.972056	0.963595	0.957689	0.940373	0.965723	0.962486	0.961211	0.93949	0.978499	0.980223	0.973353	0.9634	0.975013	0.967675	0.962516	0.949758
	loglik
Cib	inters	8.98014	9.80621	11.5843	13.6883	8.42971	9.26654	9.96217	13.0845	8.58748	9.22392	9.84816	11.4952	10.4868	11.7157	13.5119	14.8604	9.4512	10.0529	10.8013	13.7818	10.043	10.7311	11.0689	13.3416	12.4971	12.813	14.6581	17.3345	11.1765	11.9857	12.7512	15.9779	9.81461	11.1612	12.484	15.7255	14.537	16.1654	17.9193	22.0519	12.2175	14.1159	14.6622	17.666	9.28635	10.5415	11.694	14.9354
	incidence													0.99368								0.995226	0.995648	0.996041		0.984922	0.9856	0.98617	0.986974	0.990228	0.989331	0.989502	0.989775	0.993061	0.99131	0.990094	0.990512	0.981039	0.975529	0.971366	0.973556	0.986914	0.984402	0.984105	0.98639	0.993385	0.992468	0.991654	0.992463
	loglik
Cpy	inters	27.2896	26.9964	27.4783	29.2001	22.877	24.9204	25.9381	26.3697	14.8763	20.3278	25.3113	27.7555	20.9613	21.2058	21.0523	20.9133	17.4639	17.6832	18.1118	18.8504	11.7437	14.2252	18.3641	17.8381	15.4686	15.516	19.2143	21.4719	13.341	13.4699	9.89711	8.75901	10.2835	10.9327	9.86774	8.31353	10.8525	11.0858	11.3054	11.3062	7.15487	7.67286	7.63812	8.84599	6.4344	6.06891	5.29147	4.68497
	incidence	0.99376	0.996252	0.995676		0.995276	0.994969	0.997507	0.996997		0.996441			0.993619	0.997524			0.995156									1.00621	1.00502	1.00557		1.00291	1.01183	1.01758	1.0025	1.00424	1.01133	1.01699	1.00618	1.01037	1.01292	1.0141	1.00978	1.01041	1.01546	1.01537	1.00972	1.01206	1.01728	1.02052
	loglik
Oam	inters	5.42512	5.1044	5.50089	6.27683	5.5778	5.68817	7.23887	8.42023	5.5938	6.54009	7.50749	9.85252	6.71864	7.19649	8.30333	10.4579	6.16563	7.09805	10.6688	13.4672	6.90524	9.12754	10.4455	13.1282	5.76124	6.77469	8.18368	11.4806	5.59921	7.10532	10.5089	13.3723	6.99967	9.30209	10.2027	12.2905	6.75626	8.53021	11.5265	14.3662	4.78325	5.90998	8.5805	11.3141	6.37842	8.51776	8.67007	9.9274
	incidence			1.00749	1.01114	0.990598				0.990311	0.990085									0.995339	0.99283		0.994369	0.993293	0.991547		0.995889	0.996229		0.995315	0.992675	0.988693	0.987139	0.99627	0.993931	0.994357	0.993997				0.995168	1.00736	1.00808	1.00546	1.00415
	loglik
#	INTERS	18	19	19	20	19	20	19	20	18	18	19	20	18	19	19	20	19	20	19	20	17	18	19	20	17	19	19	19	18	19	19	19	16	17	18	18	17	18	18	19	17	18	18	20	16	15	17	19
#	INCID	10	10	11	11	11	12	13	13	8	9	10	12	11	11	11	12	10	10	12	12	9	8	13	13	14	14	15	16	13	15	15	15	10	10	13	17	16	15	15	17	14	15	14	16	12	10	12	16
MED	INTERS	6.35126	6.42115	7.10761	7.83996	6.10381	6.49476	6.89731	7.61981	5.43482	6.41787	6.82667	7.57865	6.39038	6.68393	7.26591	8.20635	6.29727	6.81802	7.29874	8.8118	6.03454	6.79004	7.38149	8.06068	6.86058	6.96544	7.87174	9.17782	5.75578	6.1081	6.58831	8.08754	5.49924	6.34229	6.96004	8.45402	7.60224	8.08731	9.56266	11.0908	6.09128	6.75457	7.88364	8.26571	5.1129	6.31317	6.35868	6.92922
MED	INCID	0.995726	0.995162	0.993821	0.992109	0.994323	0.994278	0.995822	0.986862	0.999047	0.997899	1.00209	1.00083	0.995094	0.995818	0.996549	0.992333	0.995066	0.995828	0.997591	0.988757	0.999171	0.997162	1.00035	0.999502	0.997848	0.997728	0.997586	0.995866	0.999821	1.00066	1.00067	1.00081	1.00345	1.00146	1.00422	1.00373	0.996939	0.996529	0.996612	0.995034	1.00348	1.00386	1.00358	0.997365	1.00353	1.00341	1.00587	1.00545
		BASELINE	2020	2050	2080
MEDIAN
#	INTERS	19	19	18.5	18
#	INCID	11	11	14.5	15
1ST QUARTILE
#	INTERS	18.75	18.75	17.75	17
#	INCID	10	10	13	13.5
3RD QUARTILE
#	INTERS	20	20	19	18.25
#	INCID	12	12	15	16
INTERQUARTILE RANGE X 1.5
#	INTERS	1.875	1.875	1.875	1.875
#	INCID	3	3	3	3.75
		BASELINE	2020	2050	2080
AVERAGE
MED	INTERS	6.75781	7.16993	7.05591	7.50435
MED	INCID	0.995664	0.996101	1.00032	1.00097
SD
MED	INTERS	0.69908	0.84189	1.12744	1.63797
MED	INCID	0.00406718	0.00320419	0.00267662	0.00405891

## Sheet: HII
		Baseline												2020												2050												2080
		RCP 8.5				RACP 6.0				RCP 4.5				RCP 8.5				RACP 6.0				RCP 4.5				RCP 8.5				RACP 6.0				RCP 4.5				RCP 8.5				RACP 6.0				RCP 4.5
Aal	inters	21.4188	16.6868	18.326	18.2638	16.4991	17.2571	16.6083	20.729	13.8991	12.0767	12.4844	13.8912	6.34046	5.24139	5.85547	6.37836	6.21654	5.94665	5.81385	7.47487	6.92753	5.66277	6.15142	7.51991	1.49191	1.34371	1.28139	1.30281	1.82945	1.58849	1.69229	1.88825	2.87674	2.36107	2.28735	2.5019	1.15034	1.12389	1.15912	1.25825	1.56859	1.42282	1.59668	1.61093	2.78357	2.69129	2.56645	2.73485
	incidence	0.915381	0.92491	0.921349	0.921479	0.926785	0.925098	0.926538	0.918171	0.932015	0.937263	0.936027	0.932036	0.959907	0.966643	0.962735	0.959694	0.962094	0.963653	0.964105	0.955191	0.956019	0.963249	0.960805	0.953929	1.00873	1.01201	1.01348	1.01297	1.00289	1.00737	1.00557	1.00188	0.986201	0.993045	0.994324	0.991598	1.01663	1.01754	1.01638	1.01384	1.00716	1.01064	1.00701	1.00673	0.98584	0.987959	0.989817	0.987449
	loglik	-663.28	-690.971	-707.724	-732.158	-683.478	-711.517	-731.88	-744.291	-684.551	-727.831	-762.578	-781.55	-647.7	-650.13	-654.504	-663.105	-653.796	-673.586	-683.927	-689.609	-667.624	-706.473	-716.11	-714.708	-686.586	-706.357	-736.231	-770.365	-683.453	-718.247	-750.524	-788.824	-666.77	-707.168	-754.648	-793.361	-680.422	-711.385	-730.576	-747.835	-671.918	-711.134	-732.168	-772.497	-617.47	-652.048	-682.053	-728.991
Gpy	inters	4.69569	5.95598	8.39427	11.3104	4.22441	5.04253	7.50266	8.42589	4.38764	4.83103	6.70498	10.8728	5.77828	7.6993	11.761	16.5138	5.63264	6.82822	11.243	14.1573	5.32305	6.24842	9.51351	15.6106	7.40169	9.98011	15.1165	21.9407	6.92699	8.26716	13.5798	14.6761	6.63664	8.16112	12.1602	21.8073	9.3307	13.446	20.1152	31.7229	8.68471	10.4057	17.505	20.6586	8.15867	9.06671	13.7951	22.1064
	incidence	0.943294	0.943202	0.934997	0.929763	0.951436	0.953918	0.943187	0.948044	0.943424	0.951524	0.947602	0.935704	0.934272	0.931744	0.920047	0.913929	0.937801	0.939974	0.92456	0.92462	0.934813	0.939947	0.932291	0.921636	0.922105	0.919164	0.90903	0.901065	0.92761	0.93058	0.916251	0.924289	0.924573	0.927565	0.921776	0.907123	0.911145	0.905055	0.895683	0.884082	0.916704	0.919617	0.904169	0.907806	0.914957	0.922105	0.915258	0.905666
	loglik	-377.383	-375.244	-393.555	-378.165	-382.887	-377.522	-391.389	-365.14	-386.597	-392.343	-400.983	-378.515	-380.17	-379.95	-398.155	-384.197	-380.979	-381.087	-395.468	-372.332	-391.082	-393.686	-408.202	-379.941	-385.766	-385.388	-408.97	-397.163	-385.33	-385.972	-408.623	-388.245	-393.893	-399.35	-418.606	-391.638	-389.363	-386.733	-417.474	-405.555	-395.812	-391.941	-425.437	-405.281	-396.345	-403.456	-425.41	-400.525
Lti	inters	9.97581e-10	9.97581e-10	9.97581e-10	9.97581e-10	7.48909e-09	7.48909e-09	7.48909e-09	7.48909e-09	7.48909e-09	7.48909e-09	7.48909e-09	7.48909e-09	9.97581e-10	9.97581e-10	9.97581e-10	9.97581e-10	7.48909e-09	7.48909e-09	7.48909e-09	7.48909e-09	7.48909e-09	7.48909e-09	7.48909e-09	7.48909e-09	9.97581e-10	9.97581e-10	9.97581e-10	9.97581e-10	7.48909e-09	7.48909e-09	7.48909e-09	7.48909e-09	7.48909e-09	7.48909e-09	7.48909e-09	7.48909e-09	9.97581e-10	9.97581e-10	9.97581e-10	9.97581e-10	7.48909e-09	7.48909e-09	7.48909e-09	7.48909e-09	7.48909e-09	7.48909e-09	7.48909e-09	7.48909e-09
	incidence	1	1	1	1	1	1	1	1	1	1	1	1	1	1	1	1	1	1	1	1	1	1	1	1	1	1	1	1	1	1	1	1	1	1	1	1	1	1	1	1	1	1	1	1	1	1	1	1
	loglik	8.15517e-06	8.15517e-06	8.15517e-06	8.15517e-06	-3.51729e-06	-3.51729e-06	-3.51729e-06	-3.51729e-06	-3.7057e-06	-3.7057e-06	-3.7057e-06	-3.7057e-06	8.15517e-06	8.15517e-06	8.15517e-06	8.15517e-06	-3.51729e-06	-3.51729e-06	-3.51729e-06	-3.51729e-06	-3.7057e-06	-3.7057e-06	-3.7057e-06	-3.7057e-06	8.15517e-06	8.15517e-06	8.15517e-06	8.15517e-06	-3.51729e-06	-3.51729e-06	-3.51729e-06	-3.51729e-06	-3.7057e-06	-3.7057e-06	-3.7057e-06	-3.7057e-06	8.15517e-06	8.15517e-06	8.15517e-06	8.15517e-06	-3.51729e-06	-3.51729e-06	-3.51729e-06	-3.51729e-06	-3.7057e-06	-3.7057e-06	-3.7057e-06	-3.7057e-06
Sci	inters	7.37909e-10	7.37909e-10	7.37909e-10	7.37909e-10	7.48909e-09	7.48909e-09	7.48909e-09	7.48909e-09	7.48909e-09	7.48909e-09	7.48909e-09	7.48909e-09	7.37909e-10	7.37909e-10	7.37909e-10	7.37909e-10	7.48909e-09	7.48909e-09	7.48909e-09	7.48909e-09	7.48909e-09	7.48909e-09	7.48909e-09	7.48909e-09	7.37909e-10	7.37909e-10	7.37909e-10	7.37909e-10	7.48909e-09	7.48909e-09	7.48909e-09	7.48909e-09	7.48909e-09	7.48909e-09	7.48909e-09	7.48909e-09	7.37909e-10	7.37909e-10	7.37909e-10	7.37909e-10	7.48909e-09	7.48909e-09	7.48909e-09	7.48909e-09	7.48909e-09	7.48909e-09	7.48909e-09	7.48909e-09
	incidence	1	1	1	1	1	1	1	1	1	1	1	1	1	1	1	1	1	1	1	1	1	1	1	1	1	1	1	1	1	1	1	1	1	1	1	1	1	1	1	1	1	1	1	1	1	1	1	1
	loglik	-2.05476e-05	-2.05476e-05	-2.05476e-05	-2.05476e-05	-3.92779e-06	-3.92779e-06	-3.92779e-06	-3.92779e-06	-3.61388e-06	-3.61388e-06	-3.61388e-06	-3.61388e-06	-2.05476e-05	-2.05476e-05	-2.05476e-05	-2.05476e-05	-3.92779e-06	-3.92779e-06	-3.92779e-06	-3.92779e-06	-3.61388e-06	-3.61388e-06	-3.61388e-06	-3.61388e-06	-2.05476e-05	-2.05476e-05	-2.05476e-05	-2.05476e-05	-3.92779e-06	-3.92779e-06	-3.92779e-06	-3.92779e-06	-3.61388e-06	-3.61388e-06	-3.61388e-06	-3.61388e-06	-2.05476e-05	-2.05476e-05	-2.05476e-05	-2.05476e-05	-3.92779e-06	-3.92779e-06	-3.92779e-06	-3.92779e-06	-3.61388e-06	-3.61388e-06	-3.61388e-06	-3.61388e-06
Pvo	inters	2.89628	2.83317	2.84477	2.87851	0.894568	0.877965	0.876241	0.889223	2.75374e-09	2.75374e-09	2.75374e-09	2.75374e-09	2.67438	2.63227	2.62943	2.64117	0.846966	0.836627	0.824985	0.840365	2.75374e-09	2.75374e-09	2.75374e-09	2.75374e-09	2.69024	2.65252	2.65484	2.66466	0.877661	0.86497	0.85467	0.86851	2.75374e-09	2.75374e-09	2.75374e-09	2.75374e-09	2.72977	2.69712	2.71873	2.7202	0.920269	0.909554	0.894219	0.904931	2.75374e-09	2.75374e-09	2.75374e-09	2.75374e-09
	incidence	1.00588	1.00728	1.00615	1.00572	1.04318	1.04472	1.04537	1.04471	1	1	1	1	1.00931	1.01013	1.00951	1.00977	1.04619	1.0472	1.04883	1.04786	1	1	1	1	1.00733	1.00799	1.00718	1.00752	1.04326	1.04446	1.04594	1.04516	1	1	1	1	1.01116	1.01234	1.01156	1.01222	1.03932	1.0403	1.04221	1.04178	1	1	1	1
	loglik	-360.287	-360.292	-362.662	-358.661	-418.432	-418.001	-415.434	-416.588	1.48485e-06	1.48485e-06	1.48485e-06	1.48485e-06	-359.714	-359.592	-362.033	-359.225	-401.431	-400.434	-399.104	-399.629	1.48485e-06	1.48485e-06	1.48485e-06	1.48485e-06	-357.65	-358.724	-360.606	-357.727	-391.973	-391.929	-389.479	-389.058	1.48485e-06	1.48485e-06	1.48485e-06	1.48485e-06	-353.888	-353.7	-352.682	-348.852	-405.09	-405.972	-404.162	-403.242	1.48485e-06	1.48485e-06	1.48485e-06	1.48485e-06
Cfi	inters	2.90029e-10	1.06416	0.459368	0.555322	5.31702e-12	0.0115232	0.49763	1.28664	7.03535e-09	7.03535e-09	0.0545135	0.200962	2.90029e-10	0.803114	0.406169	0.569063	5.31702e-12	0.0115232	0.573084	1.47734	7.03535e-09	7.03535e-09	0.0394123	0.170496	2.90029e-10	0.620636	0.39958	0.536587	5.31702e-12	0.0115232	0.77084	1.58994	7.03535e-09	7.03535e-09	0.0359948	0.156802	2.90029e-10	0.489305	0.383936	0.496284	5.31702e-12	0.0153801	0.77902	1.55535	7.03535e-09	7.03535e-09	0.0307992	0.146807
	incidence	1	0.758071	0.950838	0.99056	1	0.974811	0.950669	0.927901	1	1	1.05399	1.04989	1	0.781639	0.958486	0.987983	1	0.974811	0.940183	0.917341	1	1	1.06597	1.05485	1	0.803149	0.959703	0.992189	1	0.974811	0.917668	0.911674	1	1	1.07065	1.05923	1	0.822882	0.962667	0.99773	1	0.953834	0.916855	0.913375	1	1	1.07851	1.06201
	loglik	6.61258e-05	-54.0148	-184.136	-288.335	0.00319474	-13.009	-191.118	-276.303	-4.89002e-06	-4.89002e-06	-129.671	-292.977	6.61258e-05	-52.8751	-180.84	-285.476	0.00319474	-13.009	-185.281	-268.792	-4.89002e-06	-4.89002e-06	-116.596	-279.656	6.61258e-05	-53.7113	-181.315	-287.866	0.00319474	-13.009	-183.893	-268.209	-4.89002e-06	-4.89002e-06	-116.378	-273.903	6.61258e-05	-56.5346	-187.533	-295.717	0.00319474	-12.9541	-187.303	-275.404	-4.89002e-06	-4.89002e-06	-118.574	-273.063
Ccr	inters	7.48909e-09	7.48909e-09	7.48909e-09	7.48909e-09	7.48909e-09	7.48909e-09	7.48909e-09	7.48909e-09	7.03535e-09	7.03535e-09	7.03535e-09	7.03535e-09	7.48909e-09	7.48909e-09	7.48909e-09	7.48909e-09	7.48909e-09	7.48909e-09	7.48909e-09	7.48909e-09	7.03535e-09	7.03535e-09	7.03535e-09	7.03535e-09	7.48909e-09	7.48909e-09	7.48909e-09	7.48909e-09	7.48909e-09	7.48909e-09	7.48909e-09	7.48909e-09	7.03535e-09	7.03535e-09	7.03535e-09	7.03535e-09	7.48909e-09	7.48909e-09	7.48909e-09	7.48909e-09	7.48909e-09	7.48909e-09	7.48909e-09	7.48909e-09	7.03535e-09	7.03535e-09	7.03535e-09	7.03535e-09
	incidence	1	1	1	1	1	1	1	1	1	1	1	1	1	1	1	1	1	1	1	1	1	1	1	1	1	1	1	1	1	1	1	1	1	1	1	1	1	1	1	1	1	1	1	1	1	1	1	1
	loglik	-3.8402e-06	-3.8402e-06	-3.8402e-06	-3.8402e-06	-3.82498e-06	-3.82498e-06	-3.82498e-06	-3.82498e-06	-4.90921e-06	-4.90921e-06	-4.90921e-06	-4.90921e-06	-3.8402e-06	-3.8402e-06	-3.8402e-06	-3.8402e-06	-3.82498e-06	-3.82498e-06	-3.82498e-06	-3.82498e-06	-4.90921e-06	-4.90921e-06	-4.90921e-06	-4.90921e-06	-3.8402e-06	-3.8402e-06	-3.8402e-06	-3.8402e-06	-3.82498e-06	-3.82498e-06	-3.82498e-06	-3.82498e-06	-4.90921e-06	-4.90921e-06	-4.90921e-06	-4.90921e-06	-3.8402e-06	-3.8402e-06	-3.8402e-06	-3.8402e-06	-3.82498e-06	-3.82498e-06	-3.82498e-06	-3.82498e-06	-4.90921e-06	-4.90921e-06	-4.90921e-06	-4.90921e-06
Mca	inters	1.02063	1.41859	2.1329	2.78559	0.955393	1.49058	2.21537	3.24769	1.06823	1.371	1.76079	2.49737	0.945317	1.3692	2.03616	2.82635	0.954095	1.54148	2.2714	3.368	1.05084	1.3328	1.65867	2.61393	0.922564	1.54386	2.33446	3.32338	1.09456	1.68696	2.41275	3.52605	1.17344	1.54777	2.01076	2.83519	0.998997	1.40878	2.14087	2.76179	0.901454	1.44423	2.02746	2.89488	1.01018	1.35385	1.73213	2.2905
	incidence	1.04327	1.03965	1.03382	1.03163	1.04597	1.03963	1.03191	1.02562	1.04169	1.04037	1.03997	1.03198	1.04155	1.03609	1.02981	1.02467	1.04215	1.0338	1.02626	1.01875	1.03851	1.03687	1.03676	1.02558	1.04245	1.0306	1.0237	1.01756	1.03578	1.02925	1.02276	1.01568	1.03373	1.02999	1.02841	1.02104	1.03863	1.03375	1.02654	1.02352	1.0421	1.03427	1.02802	1.02168	1.03841	1.03418	1.03281	1.02747
	loglik	-466.242	-462.097	-447.242	-429.76	-468.427	-460.411	-447.685	-440.285	-465.856	-453.785	-445.997	-470.989	-485.218	-491.981	-492.107	-487.688	-485.987	-489.988	-481.627	-489.086	-482.739	-476.692	-479.339	-504.162	-452.096	-454.602	-442.901	-429.639	-462.831	-460.479	-442.036	-441.358	-457.553	-449.08	-443.57	-464.666	-432.242	-420.064	-393.23	-374.541	-434.583	-422.062	-399.66	-384.301	-430.77	-421.163	-407.984	-421.406
Mav	inters	2.63367e-10	2.63367e-10	2.63367e-10	2.63367e-10	1.66323e-11	1.66323e-11	1.66323e-11	1.66323e-11	2.54803e-09	2.54803e-09	2.54803e-09	2.54803e-09	2.63367e-10	2.63367e-10	2.63367e-10	2.63367e-10	1.66323e-11	1.66323e-11	1.66323e-11	1.66323e-11	2.54803e-09	2.54803e-09	2.54803e-09	2.54803e-09	2.63367e-10	2.63367e-10	2.63367e-10	2.63367e-10	1.66323e-11	1.66323e-11	1.66323e-11	1.66323e-11	2.54803e-09	2.54803e-09	2.54803e-09	2.54803e-09	2.63367e-10	2.63367e-10	2.63367e-10	2.63367e-10	1.66323e-11	1.66323e-11	1.66323e-11	1.66323e-11	2.54803e-09	2.54803e-09	2.54803e-09	2.54803e-09
	incidence	1	1	1	1	1	1	1	1	1	1	1	1	1	1	1	1	1	1	1	1	1	1	1	1	1	1	1	1	1	1	1	1	1	1	1	1	1	1	1	1	1	1	1	1	1	1	1	1
	loglik	-3.96326e-05	-3.96326e-05	-3.96326e-05	-3.96326e-05	0.000908447	0.000908447	0.000908447	0.000908447	-9.97394e-06	-9.97394e-06	-9.97394e-06	-9.97394e-06	-3.96326e-05	-3.96326e-05	-3.96326e-05	-3.96326e-05	0.000908447	0.000908447	0.000908447	0.000908447	-9.97394e-06	-9.97394e-06	-9.97394e-06	-9.97394e-06	-3.96326e-05	-3.96326e-05	-3.96326e-05	-3.96326e-05	0.000908447	0.000908447	0.000908447	0.000908447	-9.97394e-06	-9.97394e-06	-9.97394e-06	-9.97394e-06	-3.96326e-05	-3.96326e-05	-3.96326e-05	-3.96326e-05	0.000908447	0.000908447	0.000908447	0.000908447	-9.97394e-06	-9.97394e-06	-9.97394e-06	-9.97394e-06
Dni	inters	5.19985	7.61354	8.64872	11.0461	6.83272	7.0214	10.6861	12.339	8.84157	10.2862	10.3833	10.647	5.81374	9.2571	11.5453	15.3601	7.70412	8.46702	14.4332	19.3664	10.3283	12.9219	14.1848	16.0993	6.09029	9.37456	12.7821	18.7262	8.20844	8.83799	14.3719	21.825	11.0081	14.0104	15.9301	17.4782	6.49155	10.3801	13.3354	19.2416	8.64276	9.38945	15.377	22.9003	10.7969	14.168	15.6666	19.1606
	incidence	0.925031	0.924771	0.934001	0.93693	0.912008	0.922955	0.920149	0.928962	0.90661	0.916059	0.92802	0.942768	0.920194	0.91635	0.921873	0.92329	0.906801	0.915199	0.907297	0.910651	0.8998	0.906039	0.914466	0.925311	0.918179	0.915806	0.917236	0.91446	0.904047	0.913068	0.90748	0.905291	0.897003	0.902482	0.90934	0.92122	0.915409	0.91141	0.915407	0.912649	0.901805	0.910444	0.904566	0.902802	0.897853	0.90199	0.910077	0.917125
	loglik	-374.753	-414.528	-437.505	-439.211	-362.93	-398.642	-426.08	-436.619	-372.914	-402.045	-417.493	-403.271	-371.913	-407.883	-430.767	-433.626	-361.627	-393.656	-419.335	-420.988	-372.156	-398.287	-410.612	-394.561	-371.742	-405.526	-427.08	-429.424	-358.861	-392.248	-417.659	-418.819	-367.931	-392.661	-403.307	-388.791	-367.335	-399.274	-420.285	-423.354	-355.695	-387.033	-409.238	-410.256	-363.482	-384.447	-397.159	-382.166
Sbe	inters	2.0132e-09	2.0132e-09	2.0132e-09	2.0132e-09	7.48909e-09	7.48909e-09	7.48909e-09	7.48909e-09	2.54803e-09	2.54803e-09	2.54803e-09	2.54803e-09	2.0132e-09	2.0132e-09	2.0132e-09	2.0132e-09	7.48909e-09	7.48909e-09	7.48909e-09	7.48909e-09	2.54803e-09	2.54803e-09	2.54803e-09	2.54803e-09	2.0132e-09	2.0132e-09	2.0132e-09	2.0132e-09	7.48909e-09	7.48909e-09	7.48909e-09	7.48909e-09	2.54803e-09	2.54803e-09	2.54803e-09	2.54803e-09	2.0132e-09	2.0132e-09	2.0132e-09	2.0132e-09	7.48909e-09	7.48909e-09	7.48909e-09	7.48909e-09	2.54803e-09	2.54803e-09	2.54803e-09	2.54803e-09
	incidence	1	1	1	1	1	1	1	1	1	1	1	1	1	1	1	1	1	1	1	1	1	1	1	1	1	1	1	1	1	1	1	1	1	1	1	1	1	1	1	1	1	1	1	1	1	1	1	1
	loglik	-5.79919e-06	-5.79919e-06	-5.79919e-06	-5.79919e-06	-3.85351e-06	-3.85351e-06	-3.85351e-06	-3.85351e-06	-1.00001e-05	-1.00001e-05	-1.00001e-05	-1.00001e-05	-5.79919e-06	-5.79919e-06	-5.79919e-06	-5.79919e-06	-3.85351e-06	-3.85351e-06	-3.85351e-06	-3.85351e-06	-1.00001e-05	-1.00001e-05	-1.00001e-05	-1.00001e-05	-5.79919e-06	-5.79919e-06	-5.79919e-06	-5.79919e-06	-3.85351e-06	-3.85351e-06	-3.85351e-06	-3.85351e-06	-1.00001e-05	-1.00001e-05	-1.00001e-05	-1.00001e-05	-5.79919e-06	-5.79919e-06	-5.79919e-06	-5.79919e-06	-3.85351e-06	-3.85351e-06	-3.85351e-06	-3.85351e-06	-1.00001e-05	-1.00001e-05	-1.00001e-05	-1.00001e-05
Hcr	inters	0.93368	1.42908	1.82217	2.86401	0.878201	1.40319	1.9163	2.64451	0.888791	1.47837	1.89485	2.34036	1.05878	1.64341	2.00881	2.89092	0.971874	1.55159	2.09425	2.76125	0.986286	1.59906	1.99425	2.4087	1.1997	1.68455	2.07451	2.78557	1.1203	1.66541	2.22651	2.90059	1.25232	1.76856	2.10256	2.60013	1.34615	1.99437	2.20465	2.79928	1.22881	1.93323	2.45601	2.9279	1.32288	1.81357	2.22515	2.88344
	incidence	1.02817	1.02128	1.01832	1.01167	1.0303	1.02122	1.01631	1.01391	1.03009	1.02032	1.0172	1.01643	1.02422	1.01673	1.01497	1.01083	1.02706	1.01804	1.01349	1.01239	1.02659	1.01736	1.01474	1.01503	1.01967	1.01502	1.0132	1.01122	1.02202	1.01494	1.01061	1.01001	1.01899	1.01379	1.0128	1.01241	1.01583	1.00962	1.01058	1.00989	1.01888	1.00992	1.00709	1.00829	1.01637	1.01227	1.01052	1.00869
	loglik	-449.94	-464.741	-469.232	-459.601	-445.023	-465.798	-471.027	-462.241	-446.807	-462.644	-472.356	-474.715	-452.886	-464.14	-468.118	-466.372	-445.031	-463.192	-466.916	-464.054	-451.528	-466.119	-472.187	-478.176	-440.097	-449.647	-453.285	-437.392	-432.322	-450.273	-450.589	-437.909	-440.241	-454.221	-452.532	-454.98	-421.592	-428.572	-430.221	-414.633	-416.275	-432.05	-425.926	-419.501	-426.846	-434.031	-428.03	-428.511
Cau	inters	51.0316	48.3171	34.7279	14.7373	16.2809	15.9787	19.6693	20.5538	9.11385	10.7242	6.87006	13.1672	175.754	238.799	327.679	129.487	47.8841	118.152	277.636	422.967	14.889	31.5627	42.6043	79.91	64.7126	60.9724	61.3576	31.5592	26.0638	45.2226	80.9127	105.318	12.0894	22.099	26.7937	14.7867	17.8198	30.8289	36.115	10.0103	3.74807	8.29971	17.5499	33.8959	1.40878	2.46117	4.99424	11.1056
	incidence	0.958207	0.963309	0.982389	1.03229	0.994291	0.998052	0.996392	1.00213	1.01741	1.01381	1.03742	1.01731	0.918026	0.911103	0.90163	0.952435	0.957894	0.930218	0.903143	0.892851	1.00063	0.975966	0.967342	0.949616	0.938695	0.951233	0.955961	0.999609	0.972325	0.954845	0.93821	0.934313	1.00501	0.984302	0.980451	1.00451	0.970363	0.951986	0.951366	1.01367	1.02463	0.994764	0.968666	0.949137	1.07373	1.0525	1.02689	1.00087
	loglik	-399.593	-448.866	-478.685	-321.384	-337.259	-359.024	-364.374	-391.031	-343.832	-364.851	-305.277	-304.957	-434.088	-507.021	-604.335	-458.008	-352.96	-397.402	-450.873	-535.228	-333.719	-358.286	-364.346	-372.377	-550.324	-576.671	-671.243	-549.815	-347.277	-415.106	-466.43	-516.581	-340.159	-405.401	-432.512	-520.039	-332.947	-378.501	-397.301	-343.531	-349.663	-392.222	-464.23	-527.507	-320.683	-372.486	-406.368	-444.274
Clu	inters	9.61568	13.0389	11.3649	12.7566	6.83497	8.99093	13.344	15.7264	5.0781	5.98517	8.50272	10.0802	6.75057	8.22166	7.21809	8.97648	4.86633	6.11067	9.56444	10.56	4.21947	4.96938	7.04972	8.11952	8.26914	9.77359	9.16283	11.6098	4.91902	6.76571	9.86378	10.584	4.27179	5.14636	7.39419	8.24034	11.3928	15.1176	14.6772	20.4764	4.96635	6.38486	9.64866	10.9932	4.29391	5.27677	7.35286	8.70312
	incidence	0.945329	0.929087	0.952104	0.959825	0.964511	0.95663	0.934125	0.930351	0.96158	0.961557	0.953367	0.956894	0.966486	0.957078	0.98021	0.975143	0.982586	0.977823	0.952423	0.951921	0.971153	0.970188	0.962695	0.967813	0.946787	0.940055	0.956138	0.947332	0.981769	0.970045	0.947823	0.949292	0.969666	0.967001	0.957602	0.964838	0.918399	0.906727	0.925055	0.917788	0.980322	0.97021	0.945276	0.941467	0.9687	0.965177	0.95553	0.958746
	loglik	-326.19	-321.479	-306.058	-272.278	-306.245	-289.323	-297.817	-280.578	-380.283	-357.767	-338.562	-303.04	-334.967	-334.817	-323.654	-307.513	-334.556	-330.098	-335.103	-326.669	-392.448	-373.028	-352.132	-320.287	-327.56	-333.631	-325.106	-301.29	-320.679	-308.001	-312.086	-305.319	-383.882	-365.669	-343.93	-318.596	-389.251	-394.321	-406.849	-400.422	-318.937	-318.728	-314.018	-305.549	-381.569	-360.138	-342.001	-308.585
Ala	inters	11.8948	14.5256	17.9273	18.1104	8.98456	10.6744	11.2624	12.8886	12.9554	16.0339	16.1506	17.3819	15.8952	20.5318	27.07	29.4427	12.6427	13.766	15.8956	18.3843	19.6827	21.4491	23.4154	24.9482	22.5656	41.5934	55.2259	53.9795	23.4807	30.9621	36.9214	37.3436	31.1127	40.5051	40.4168	41.2747	33.7888	84.2925	109.462	110.463	36.6711	40.2646	50.2894	50.9517	29.8325	34.8985	41.022	42.002
	incidence	1.02417	1.01827	1.01079	1.01009	1.01215	1.00784	1.00724	1.00425	0.974707	0.957014	0.959209	0.9614	1.01519	1.00761	0.998004	0.995915	1.00385	0.998293	0.995629	0.991204	0.958219	0.954729	0.959521	0.959854	1.00411	0.994444	0.986899	0.99457	1.00136	0.995253	0.990782	0.989698	0.962855	0.950621	0.950915	0.958156	0.994294	0.968633	0.961354	0.960702	0.980988	0.97454	0.967963	0.966733	0.957801	0.955368	0.949466	0.956291
	loglik	-212.424	-184.939	-152.029	-155.449	-279.187	-253.956	-258.335	-259.892	-309.966	-301.612	-317.239	-309.424	-384.441	-367.499	-322.688	-304.535	-399.286	-437.301	-446.141	-461.115	-408.171	-428.644	-427.4	-456.853	-508.806	-341.016	-290.723	-253.275	-311.346	-260.685	-264.05	-326.942	-300.497	-275.228	-326.68	-351.215	-458.764	-250.211	-195.061	-206.123	-248.863	-291.787	-301.007	-376.273	-327.751	-314.663	-304.881	-328.29
Uar	inters	3.69936e-10	0.264237	1.04323	1.62959	1.61765e-09	1.61765e-09	0.58084	2.0357	1.25645e-09	1.25645e-09	0.450866	1.75062	3.69936e-10	0.275582	1.04375	1.71926	1.61765e-09	1.61765e-09	0.66317	2.13713	1.25645e-09	1.25645e-09	0.412713	1.75748	3.69936e-10	0.279896	1.00931	1.70862	1.61765e-09	1.61765e-09	0.755817	2.01464	1.25645e-09	1.25645e-09	0.371079	1.5124	3.69936e-10	0.332364	0.996095	1.73657	1.61765e-09	1.61765e-09	0.782128	1.97287	1.25645e-09	1.25645e-09	0.346157	1.46223
	incidence	1	0.856416	0.867757	0.887158	1	1	0.820967	0.812225	1	1	0.762848	0.777291	1	0.85137	0.867695	0.880518	1	1	0.805183	0.80632	1	1	0.773129	0.776844	1	0.849504	0.871808	0.881289	1	1	0.789562	0.813486	1	1	0.785482	0.794006	1	0.828817	0.873421	0.879274	1	1	0.785465	0.816025	1	1	0.793552	0.797862
	loglik	6.13318e-05	-82.8931	-236.628	-325.945	-1.27816e-05	-1.27816e-05	-115.28	-249.199	-8.52882e-06	-8.52882e-06	-64.7206	-189.634	6.13318e-05	-83.3756	-241.336	-334.261	-1.27816e-05	-1.27816e-05	-116.187	-257.994	-8.52882e-06	-8.52882e-06	-66.8262	-195.934	6.13318e-05	-83.7134	-244.636	-341.721	-1.27816e-05	-1.27816e-05	-117.484	-262.116	-8.52882e-06	-8.52882e-06	-65.9596	-196.459	6.13318e-05	-85.4752	-246.106	-343.167	-1.27816e-05	-1.27816e-05	-118.527	-261.716	-8.52882e-06	-8.52882e-06	-65.9104	-193.623
Mlu	inters	2.27686	1.88253	1.74471	2.86589	2.27224	2.516	3.33531	4.91431	2.46564	2.48894	2.39542	2.07871	2.18399	1.95208	2.04004	1.37484	2.07336	1.32813	1.5849	2.43577	2.04264	1.90039	1.48446	1.20876	3.08511	1.56752	1.45077	2.09817	1.38504	1.15471	1.2562	1.71846	1.97374	1.88718	1.55258	1.54865	4.96252	5.05755	5.44045	8.94008	4.41085	5.36949	6.77226	10.3543	2.60226	2.40798	1.98722	2.05362
	incidence	1.03225	1.04471	1.05113	1.038	1.04168	1.044	1.03856	1.02636	1.02129	1.02732	1.03265	1.04421	1.02967	1.0388	1.0419	1.0706	1.04369	1.07274	1.07086	1.0562	1.02546	1.03392	1.04901	1.06095	1.01684	1.05071	1.06129	1.0569	1.06449	1.08132	1.08548	1.07877	1.02567	1.03431	1.05018	1.05406	0.994019	0.994435	0.995477	0.983193	1.00688	1.00428	1.00223	0.99232	1.01214	1.02258	1.03814	1.03998
	loglik	-406.546	-443.248	-459.443	-449.136	-420.316	-426.026	-416.944	-411.134	-374.207	-364.452	-373.473	-361.647	-431.051	-472.617	-492.242	-453.135	-448.813	-424.62	-410.811	-401.018	-389.197	-394.689	-402.548	-423.999	-393.909	-427.099	-430.437	-394.739	-410.357	-395.691	-374.376	-355.822	-372.261	-371.759	-357.778	-376.37	-390.133	-458.002	-493.693	-508.854	-459.461	-492.524	-478.249	-496.746	-382.097	-385.109	-378.775	-411.328
Mpu	inters	1.87486e-10	1.87486e-10	1.87486e-10	1.87486e-10	7.48909e-09	7.48909e-09	7.48909e-09	7.48909e-09	1.57792e-10	1.57792e-10	1.57792e-10	1.57792e-10	1.87486e-10	1.87486e-10	1.87486e-10	1.87486e-10	7.48909e-09	7.48909e-09	7.48909e-09	7.48909e-09	1.57792e-10	1.57792e-10	1.57792e-10	1.57792e-10	1.87486e-10	1.87486e-10	1.87486e-10	1.87486e-10	7.48909e-09	7.48909e-09	7.48909e-09	7.48909e-09	1.57792e-10	1.57792e-10	1.57792e-10	1.57792e-10	1.87486e-10	1.87486e-10	1.87486e-10	1.87486e-10	7.48909e-09	7.48909e-09	7.48909e-09	7.48909e-09	1.57792e-10	1.57792e-10	1.57792e-10	1.57792e-10
	incidence	1	1	1	1	1	1	1	1	1	1	1	1	1	1	1	1	1	1	1	1	1	1	1	1	1	1	1	1	1	1	1	1	1	1	1	1	1	1	1	1	1	1	1	1	1	1	1	1
	loglik	5.61624e-05	5.61624e-05	5.61624e-05	5.61624e-05	-3.47311e-06	-3.47311e-06	-3.47311e-06	-3.47311e-06	0.000121764	0.000121764	0.000121764	0.000121764	5.61624e-05	5.61624e-05	5.61624e-05	5.61624e-05	-3.47311e-06	-3.47311e-06	-3.47311e-06	-3.47311e-06	0.000121764	0.000121764	0.000121764	0.000121764	5.61624e-05	5.61624e-05	5.61624e-05	5.61624e-05	-3.47311e-06	-3.47311e-06	-3.47311e-06	-3.47311e-06	0.000121764	0.000121764	0.000121764	0.000121764	5.61624e-05	5.61624e-05	5.61624e-05	5.61624e-05	-3.47311e-06	-3.47311e-06	-3.47311e-06	-3.47311e-06	0.000121764	0.000121764	0.000121764	0.000121764
Mma	inters	2.10149e-11	2.10149e-11	2.10149e-11	2.10149e-11	1.87486e-10	1.87486e-10	2.54803e-09	2.54803e-09	2.75508e-09	2.75508e-09	1.0093e-11	1.0093e-11	2.10149e-11	2.10149e-11	2.10149e-11	2.10149e-11	1.87486e-10	1.87486e-10	2.54803e-09	2.54803e-09	2.75508e-09	2.75508e-09	1.0093e-11	1.0093e-11	2.10149e-11	2.10149e-11	2.10149e-11	2.10149e-11	1.87486e-10	1.87486e-10	2.54803e-09	2.54803e-09	2.75508e-09	2.75508e-09	1.0093e-11	1.0093e-11	2.10149e-11	2.10149e-11	2.10149e-11	2.10149e-11	1.87486e-10	1.87486e-10	2.54803e-09	2.54803e-09	2.75508e-09	2.75508e-09	1.0093e-11	1.0093e-11
	incidence	1	1	1	1	1	1	1	1	1	1	1	1	1	1	1	1	1	1	1	1	1	1	1	1	1	1	1	1	1	1	1	1	1	1	1	1	1	1	1	1	1	1	1	1	1	1	1	1
	loglik	0.000179638	0.000179638	0.000179638	0.000179638	4.71928e-05	4.71928e-05	-9.74911e-06	-9.74911e-06	2.04321e-06	2.04321e-06	0.00192606	0.00192606	0.000179638	0.000179638	0.000179638	0.000179638	4.71928e-05	4.71928e-05	-9.74911e-06	-9.74911e-06	2.04321e-06	2.04321e-06	0.00192606	0.00192606	0.000179638	0.000179638	0.000179638	0.000179638	4.71928e-05	4.71928e-05	-9.74911e-06	-9.74911e-06	2.04321e-06	2.04321e-06	0.00192606	0.00192606	0.000179638	0.000179638	0.000179638	0.000179638	4.71928e-05	4.71928e-05	-9.74911e-06	-9.74911e-06	2.04321e-06	2.04321e-06	0.00192606	0.00192606
Ggu	inters	13.4578	13.7381	13.5143	14.473	13.3588	13.7083	12.8825	12.5963	10.4178	13.3895	13.7189	14.0324	12.2711	14.1317	15.3114	15.8779	12.8246	13.4352	12.9793	12.5466	11.7247	12.2474	13.2567	14.058	20.8591	23.8654	25.7351	25.0731	17.0318	20.3571	20.5204	19.4637	16.0935	15.0817	15.9646	20.4414	25.8214	37.2937	43.7615	57.6565	20.5068	24.4411	25.621	24.5737	17.5767	16.4613	18.2798	21.3863
	incidence	0.935758	0.929938	0.93139	0.918388	0.915228	0.916486	0.953367	0.954495	0.921859	0.893703	0.880072	0.888483	1.01584	0.983971	0.954932	0.941633	0.990479	1.00214	1.03526	1.0476	0.950941	0.980285	0.967776	0.956336	1.0324	0.99912	0.970508	0.998811	1.03286	1.00858	1.03777	1.057	0.948031	1.00181	1.01769	0.976485	1.00708	0.937741	0.924999	0.883384	1.0227	1.00845	1.07755	1.09346	0.92838	0.980067	0.990759	0.989736
	loglik	-233.898	-227.297	-215.566	-187.63	-270.268	-251.453	-233.513	-229.826	-338.97	-286.377	-289.288	-263.393	-307.013	-295.082	-300.419	-310.337	-312.213	-299.108	-284.281	-300.253	-343.381	-336.893	-328.576	-333.185	-244.167	-271.734	-325.204	-343.428	-288.961	-306.21	-339.695	-399.842	-300.368	-325.459	-323.841	-325.579	-344.735	-342.429	-370.001	-389.436	-286.929	-300.044	-272.274	-338.018	-303.26	-328.94	-315.112	-305.804
Llu	inters	6.76074	4.36246	3.91411	4.90277	5.61548	4.8451	3.93407	5.14551	5.65085	4.83816	4.00054	5.27019	6.62222	4.4199	4.30032	5.9873	5.65683	4.60447	4.26477	6.50646	5.6697	4.49861	4.22881	6.30381	6.80621	4.60318	4.52858	6.78005	5.62885	4.78793	4.36049	7.01555	5.78954	4.60749	4.44103	6.96342	6.85281	4.85704	4.56437	6.79811	5.58913	5.10677	4.42059	6.89547	5.78548	4.8749	4.51976	6.7041
	incidence	0.911855	0.940829	0.953505	0.953967	0.912964	0.933209	0.9504	0.949933	0.913799	0.934231	0.950285	0.949077	0.91282	0.940573	0.949772	0.945148	0.912618	0.935952	0.947312	0.939842	0.913642	0.93763	0.948026	0.941246	0.911543	0.938667	0.946989	0.938874	0.912852	0.934128	0.945918	0.935583	0.912656	0.936513	0.945727	0.936157	0.911225	0.93615	0.945937	0.938064	0.913186	0.931118	0.945275	0.936401	0.912689	0.933878	0.944552	0.937614
	loglik	-385.004	-408.456	-419.146	-443.658	-372.218	-403.984	-417.708	-446.871	-374.887	-405.502	-419.443	-450.624	-385.357	-411.86	-421.463	-442.302	-370.954	-407.98	-418.759	-442.143	-373.981	-408.557	-417.913	-447.805	-382.713	-407.688	-416.805	-434.776	-367.997	-403.307	-416.843	-438.738	-371.124	-406.267	-416.174	-443.929	-383.258	-407.018	-413.145	-432.218	-367.22	-400.964	-414.723	-435.154	-371.335	-403.874	-413.485	-440.668
Fsi	inters	10.5699	9.0994	6.24538	3.95568	6.12111	6.65677	7.59798	7.20897	6.63156	6.74082	6.72982	6.12837	9.72912	8.09597	5.73399	3.94809	5.74492	5.99661	7.3145	7.22138	6.47665	6.5469	7.1881	7.33188	11.8926	11.4701	9.28387	7.26533	7.22943	8.7075	10.6418	11.8357	6.18351	5.8863	5.94366	5.67481	15.7274	15.2336	13.5843	14.892	11.5917	13.9158	16.8238	22.0997	6.70096	6.66049	7.34625	6.87164
	incidence	0.930734	0.952933	0.983451	1.01506	0.951936	0.957535	0.961228	0.976133	0.953602	0.962395	0.97172	0.983993	0.932344	0.954563	0.985078	1.01565	0.953146	0.959825	0.959911	0.973386	0.951846	0.959597	0.965124	0.971011	0.916842	0.932641	0.955159	0.979609	0.941478	0.941997	0.938723	0.944428	0.948572	0.95904	0.96784	0.977233	0.904208	0.920641	0.943303	0.955212	0.924031	0.924526	0.922936	0.922439	0.947748	0.95783	0.962381	0.973218
	loglik	-409.616	-434.541	-417.391	-394.047	-406.684	-404.571	-399.339	-382.663	-420.587	-409.725	-390.817	-381.011	-403.218	-439.785	-429.031	-403.705	-395.066	-407.399	-414.903	-395.559	-415.266	-412.239	-398.933	-397.946	-389.781	-443.352	-480.492	-494.104	-396.878	-405.511	-423.88	-434.538	-414.782	-426.882	-420.804	-430.879	-436.239	-528.653	-583.743	-595.32	-411.966	-418.436	-424.714	-444.606	-428.338	-432.525	-433.407	-443.199
Lly	inters	1.52677e-10	1.52677e-10	1.52677e-10	1.52677e-10	7.48909e-09	7.48909e-09	7.48909e-09	7.48909e-09	2.8528e-11	2.8528e-11	2.8528e-11	2.8528e-11	1.52677e-10	1.52677e-10	1.52677e-10	1.52677e-10	7.48909e-09	7.48909e-09	7.48909e-09	7.48909e-09	2.8528e-11	2.8528e-11	2.8528e-11	2.8528e-11	1.52677e-10	1.52677e-10	1.52677e-10	1.52677e-10	7.48909e-09	7.48909e-09	7.48909e-09	7.48909e-09	2.8528e-11	2.8528e-11	2.8528e-11	2.8528e-11	1.52677e-10	1.52677e-10	1.52677e-10	1.52677e-10	7.48909e-09	7.48909e-09	7.48909e-09	7.48909e-09	2.8528e-11	2.8528e-11	2.8528e-11	2.8528e-11
	incidence	1	1	1	1	1	1	1	1	1	1	1	1	1	1	1	1	1	1	1	1	1	1	1	1	1	1	1	1	1	1	1	1	1	1	1	1	1	1	1	1	1	1	1	1	1	1	1	1
	loglik	0.000118305	0.000118305	0.000118305	0.000118305	-3.59505e-06	-3.59505e-06	-3.59505e-06	-3.59505e-06	0.000726954	0.000726954	0.000726954	0.000726954	0.000118305	0.000118305	0.000118305	0.000118305	-3.59505e-06	-3.59505e-06	-3.59505e-06	-3.59505e-06	0.000726954	0.000726954	0.000726954	0.000726954	0.000118305	0.000118305	0.000118305	0.000118305	-3.59505e-06	-3.59505e-06	-3.59505e-06	-3.59505e-06	0.000726954	0.000726954	0.000726954	0.000726954	0.000118305	0.000118305	0.000118305	0.000118305	-3.59505e-06	-3.59505e-06	-3.59505e-06	-3.59505e-06	0.000726954	0.000726954	0.000726954	0.000726954
Lpa	inters	35.5557	49.7138	37.423	36.0159	26.0169	33.0677	38.5536	35.5338	33.3092	37.8948	43.6116	31.8161	155.285	181.167	173.443	121.281	96.4187	75.5316	102.82	127.578	46.7964	163.571	328.012	403.187	248.364	580.798	1047.51	1348.59	227.86	237.715	385.621	98.5507	98.5507	393.275	498.368	1288.65	47.2457	62.0037	56.9456	53.9379	44.2955	49.1259	43.1472	40.0175	34.8146	40.6893	42.1904	38.1038
	incidence	0.967804	0.956118	0.969465	0.973716	0.978826	0.971638	0.970959	0.978294	0.965271	0.96453	0.961	0.975398	0.91903	0.916677	0.920121	0.940008	0.938426	0.956053	0.952325	0.953711	0.956796	0.91984	0.895655	0.890017	0.91657	0.896267	0.880981	0.870994	0.915669	0.916645	0.913074	0.749802	0.938686	0.902838	0.90433	0.875849	0.980327	0.971802	0.977952	0.980205	0.966955	0.964064	0.976721	0.981389	0.970936	0.970328	0.971664	0.979097
	loglik	-353.203	-361.487	-362.476	-357.884	-391.297	-402.228	-349.519	-321.769	-342.241	-327.875	-330.944	-323.469	-443.067	-468.009	-494.583	-453.064	-547.149	-537.705	-500.364	-419.576	-552.865	-457.596	-464.921	-455.918	-428.98	-328.649	-269.497	-301.328	-692.891	-803.115	-735.947	-363.122	-713.468	-569.389	-525.779	-446.836	-301.134	-297.775	-299.265	-314.951	-375.724	-398.82	-348.11	-334.384	-455.349	-436.041	-431.553	-418.247
Hic	inters	1.51782	1.46754	0.969984	0.945346	1.8988	1.78829	1.2528	1.40037	1.9801	1.61685	1.34148	0.865866	1.41368	1.42763	1.20532	1.11924	1.52112	1.36408	1.20817	1.19895	1.63425	1.66565	1.41833	1.25347	1.97511	2.77787	2.80968	4.73343	2.01601	2.0082	2.8357	3.90916	1.90824	2.4016	3.21487	4.74893	1.92407	2.07934	2.29344	3.05572	1.81855	1.75378	2.25903	2.32532	2.00627	2.2821	3.13594	3.00467
	incidence	1.0488	1.05373	1.06981	1.0724	1.03903	1.04422	1.05763	1.05835	1.03884	1.04828	1.05498	1.07119	1.05334	1.05684	1.06463	1.06897	1.05095	1.0568	1.06128	1.06565	1.04874	1.05032	1.05729	1.06271	1.0436	1.03807	1.04035	1.03157	1.04284	1.04607	1.03923	1.03683	1.04346	1.04003	1.0362	1.03178	1.04405	1.04503	1.04538	1.04058	1.04516	1.04903	1.04377	1.04768	1.0407	1.03924	1.03355	1.03812
	loglik	-306.602	-295.318	-281.924	-288.606	-313.714	-306.523	-300.62	-295.419	-281.982	-271.305	-289.005	-282.863	-277.512	-262.348	-248.931	-233.188	-283.209	-278.552	-316.388	-276.875	-268.25	-285.401	-285.138	-279.063	-369.455	-399.069	-465.218	-456.761	-366.706	-412.904	-464.623	-428.744	-404.929	-446.565	-465.615	-452.39	-308.439	-335.594	-355.626	-373.56	-301.793	-328.615	-346.781	-324.357	-361.022	-414.151	-450.669	-524.133
Gge	inters	10.1444	14.5691	14.381	16.97	7.59572	12.0455	13.6418	13.1814	7.52599	9.62006	10.3108	10.6414	13.3116	20.3916	23.213	29.9353	9.09729	14.7833	17.1867	18.4261	9.59525	12.4671	14.6286	17.194	10.308	13.2322	23.4223	45.0544	8.06134	11.2444	14.2721	17.3797	9.35347	11.7675	13.6612	14.3789	15.9329	22.1463	31.2539	66.2642	8.77886	13.8364	19.9252	31.8685	7.35439	8.1916	11.0788	13.3107
	incidence	1.0008	0.991184	0.993605	0.992295	1.00779	0.995617	0.993862	0.997659	1.00408	0.999983	1.00158	1.00335	0.991838	0.980157	0.978161	0.973853	1.00171	0.988697	0.98613	0.986673	0.995734	0.991005	0.989797	0.988965	0.994828	0.987406	0.972885	0.956673	1.00213	0.992698	0.987598	0.983723	0.994449	0.990392	0.98856	0.989995	0.980056	0.9699	0.960697	0.939705	0.99723	0.984157	0.974829	0.961815	0.998596	0.997484	0.991461	0.98898
	loglik	-255.527	-276.422	-317.41	-357.408	-271.944	-282.555	-313.981	-359.105	-316.365	-300.192	-317.491	-337.416	-248.329	-270.506	-311.681	-345.044	-262.485	-269.776	-300.695	-344.023	-315.272	-301.411	-312.355	-310.206	-278.865	-320.825	-347.107	-357.623	-267.786	-289.646	-311.861	-360.389	-309.488	-294.923	-312.517	-324.897	-272.7	-318.014	-379.494	-396.117	-272.549	-290.226	-313.945	-360.488	-312.734	-307.582	-316.906	-323.307
Rru	inters	2.12076	3.25891	3.81934	4.6696	5.18574	3.79935	3.22246	2.54207	3.3084	5.13748	7.54838	4.25796	3.67806	10.4742	10.8131	14.2343	8.31537	7.13086	6.61773	5.71942	4.07776	6.91747	9.61805	7.97148	8.77153	16.877	17.2591	23.6089	9.56609	9.14941	10.9056	10.9909	5.23818	9.40868	15.3823	11.5712	15.6623	39.5942	58.1741	138.896	14.3476	15.8604	26.1219	24.4645	5.04693	9.23965	12.3948	10.0818
	incidence	1.05675	1.04958	1.05424	1.05501	1.01429	1.04675	1.06028	1.07639	1.03276	1.02136	1.015	1.04939	1.03219	0.998821	1.00888	1.00713	0.995844	1.01903	1.02755	1.04159	1.02393	1.00894	1.00534	1.02453	0.993171	0.975972	0.985092	0.978173	0.988171	1.00593	1.00398	1.01069	1.01329	0.996141	0.986803	1.0081	0.962526	0.934401	0.929732	0.89597	0.969188	0.97978	0.964414	0.971597	1.01384	0.995393	0.99228	1.01087
	loglik	-452.334	-438.875	-396.65	-401.284	-503.76	-432.734	-458.91	-477.186	-489.793	-495.982	-516.81	-518.473	-474.826	-447.99	-408.368	-416.37	-498.529	-454.353	-500.915	-499.86	-507.727	-515.351	-537.491	-531.719	-445.334	-423.302	-393.998	-427.928	-487.4	-450.156	-479.744	-482.867	-504.778	-509.182	-503.358	-510.849	-462.606	-420.178	-353.623	-384.549	-462.318	-416.25	-418.463	-444.122	-483.67	-481.995	-487.101	-483.15
Cib	inters	1.58893	1.54373	3.63332	5.87259	2.09244	1.33767	1.45475	1.54812	1.86935	0.634178	0.603038	3.74321	1.13135	1.11114	0.800907	0.486082	1.23807	0.894406	1.43151	0.659357	1.11647	0.517865	0.463956	1.04437	0.380799	0.291218	0.335535	0.704686	0.65488	0.42143	0.506537	0.886293	1.11598	0.546647	0.516285	1.3633	0.529759	0.284855	0.391603	0.667751	0.901222	0.831974	0.850115	0.8176	0.878421	0.612228	0.570637	2.28751
	incidence	1.08779	1.0969	1.05959	1.04248	1.07359	1.1031	1.10221	1.11137	1.07712	1.14243	1.14717	1.05576	1.11282	1.12227	1.14767	1.18306	1.10715	1.1286	1.10668	1.16148	1.11224	1.16016	1.16834	1.13146	1.18182	1.20136	1.20135	1.16538	1.14737	1.17677	1.16915	1.14797	1.1106	1.15841	1.16676	1.12224	1.17034	1.21205	1.19793	1.18191	1.13077	1.14106	1.14244	1.15809	1.12176	1.14959	1.15884	1.09235
	loglik	-445.195	-443.078	-444.428	-458.515	-376.955	-403.568	-431.972	-412.374	-386.21	-409.755	-471.401	-508.589	-400.396	-388.842	-383.458	-393.118	-359.232	-384.032	-401.924	-373.162	-357.687	-375.627	-415.572	-433.227	-370.465	-411.422	-423.093	-457.955	-314.092	-330.065	-366.822	-341.2	-355.052	-351.709	-364.804	-359.837	-382.09	-413.221	-454.964	-429.727	-324.311	-341.299	-381.05	-347.739	-356.226	-363	-367.225	-355.719
Cpy	inters	49.1413	68.6313	69.8986	94.109	35.6511	52.6729	65.0185	74.5829	29.963	29.626	49.4283	38.7158	19.2757	27.3447	34.2026	35.2757	15.1984	19.5177	21.582	21.0919	10.3138	12.1517	14.1925	16.7788	1.33243	2.14417	3.76176	6.89604	1.19711	1.4595	2.0797	3.76701	2.08484	2.57186	4.17277	3.90734	0.597398	1.0892	2.28285	3.44367	0.511526	0.641567	1.36056	2.14461	1.52643	1.36083	1.60039	1.81561
	incidence	0.967412	0.958103	0.957358	0.951476	0.975249	0.963028	0.9603	0.954244	0.971394	0.979554	0.97087	0.984138	0.993317	0.986821	0.979904	0.980167	0.99766	0.992787	0.991497	0.996433	1.00292	1.00415	1.00774	1.00246	1.09028	1.07964	1.06504	1.04847	1.09162	1.08693	1.07668	1.06104	1.06508	1.06143	1.04911	1.05514	1.11506	1.09852	1.07591	1.06535	1.11588	1.1113	1.09098	1.08024	1.07174	1.07852	1.07606	1.07534
	loglik	-266.068	-264.093	-320.467	-277.443	-300.187	-321.032	-292.298	-337.589	-382.593	-376.829	-300.993	-288.123	-287.479	-233.845	-247.827	-263.888	-317.348	-307.565	-312.474	-316.801	-429.247	-405.913	-331.326	-340.92	-260.028	-263.077	-280.357	-325.092	-279.307	-350.299	-409.969	-458.494	-376.013	-419.822	-449.423	-492.763	-267.534	-304.943	-347.48	-366.078	-327.434	-389.135	-398.164	-420.955	-380.091	-435.828	-472.708	-520.064
Oam	inters	4.11499	7.67799	7.11348	11.9671	5.59105	5.29456	7.37349	9.04965	4.70009	2.73976	2.27659	2.55277	2.78727	3.46677	3.49671	2.7814	3.96952	2.25235	3.5641	4.02959	11.4985	9.35657	6.87999	6.90389	2.66155	2.80362	2.70185	2.99316	3.054	2.06112	2.71669	2.99059	11.4217	12.1244	9.0891	8.04545	27.5802	46.5342	76.9573	76.6241	38.9131	34.6816	46.7938	45.0356	11.0777	10.4298	7.23294	3.78946
	incidence	1.00997	0.98614	0.99264	0.97951	0.996065	1.0013	0.998204	0.998162	1.00303	1.03059	1.04546	1.04965	1.03861	1.0322	1.0391	1.05958	1.01874	1.04959	1.04561	1.04921	0.974779	0.994653	1.01479	1.02472	1.03286	1.03676	1.04806	1.05989	1.02365	1.0512	1.05316	1.0594	0.974601	0.982478	1.00088	1.01552	0.934408	0.921069	0.906678	0.913372	0.910436	0.927296	0.927461	0.940767	0.971089	0.986698	1.0054	1.04699
	loglik	-305.898	-341.762	-349.354	-332.809	-352.653	-405.48	-373.887	-342.413	-395.285	-404.126	-396.045	-377.863	-314.966	-345.233	-350.534	-366.418	-369.521	-419.738	-362.304	-348.572	-370.234	-356.269	-382.612	-376.186	-359.426	-386.985	-393.751	-355.527	-403.941	-419.974	-363.675	-348.726	-340.969	-302.454	-322.328	-315.56	-401.67	-387.149	-370.22	-399.411	-388.851	-437.211	-439.076	-458.992	-336.701	-289.313	-357.251	-399.685
		V1	V2	V3	V4	V5	V6	V7	V8	V9	V10	V11	V12	V17	V18	V19	V20	V21	V22	V23	V24	V25	V26	V27	V28	V33	V34	V35	V36	V37	V38	V39	V40	V41	V42	V43	V44	V49	V50	V51	V52	V53	V54	V55	V56	V57	V58	V59	V60
		9.64426e-55	1.32547e-47	2.90686e-50	3.6332e-50	6.65647e-47	3.72108e-48	4.36154e-47	2.46679e-53	9.32847e-43	6.21042e-39	7.92365e-40	9.67014e-43	6.93127e-23	7.41835e-19	3.69895e-21	5.11787e-23	3.0218e-22	2.67188e-21	5.60467e-21	1.4753e-26	8.11967e-25	1.94621e-20	2.02586e-22	6.52916e-27	0.032335	0.114758	0.186109	0.158201	0.00113408	0.0127853	0.00469905	0.0006118	1.18596e-08	3.30558e-06	7.36776e-06	7.18948e-07	0.457319	0.534893	0.434038	0.222583	0.0155471	0.0583277	0.0118433	0.0103207	3.70779e-08	9.3727e-08	4.26791e-07	7.43266e-08
		7.78974e-29	1.66073e-24	4.03623e-26	4.62115e-26	1.12761e-23	1.9551e-24	8.72184e-24	1.40139e-27	2.13858e-21	4.43555e-19	1.2749e-19	2.18573e-21	8.28911e-10	1.74605e-07	8.38374e-09	6.94086e-10	4.75162e-09	1.6538e-08	2.25763e-08	1.30141e-11	3.91579e-11	1.49583e-08	1.72315e-09	4.63388e-12	0.119447	0.030782	0.0149114	0.0193573	0.60934	0.187062	0.321151	0.740363	0.0219229	0.235821	0.330315	0.153391	0.00257106	0.00139631	0.00303388	0.0127648	0.20232	0.0553006	0.21103	0.230282	0.0201556	0.0450624	0.0889224	0.0382047
		NA	NA	NA	NA	NA	NA	NA	NA	NA	NA	NA	NA	NA	NA	NA	NA	NA	NA	NA	NA	NA	NA	NA	NA	NA	NA	NA	NA	NA	NA	NA	NA	NA	NA	NA	NA	NA	NA	NA	NA	NA	NA	NA	NA	NA	NA	NA	NA
		1.52986e-09	4.78475e-12	3.32028e-16	1.42762e-18	6.65156e-09	1.37398e-10	2.35297e-15	1.27591e-15	5.69165e-08	1.41387e-09	3.3812e-13	4.20563e-19	8.5972e-12	7.15018e-15	9.61641e-21	7.75881e-24	1.23431e-11	1.06555e-13	1.17278e-20	1.46509e-22	1.13597e-09	4.50776e-12	1.17586e-17	3.51789e-25	6.85456e-15	1.88176e-18	4.76689e-26	1.98887e-30	3.6125e-14	2.43954e-16	4.47445e-25	1.00922e-24	1.00873e-11	8.21764e-15	2.49898e-21	3.15171e-31	6.56913e-18	2.70053e-22	8.44534e-31	5.09231e-37	7.01646e-17	3.63104e-19	2.44908e-29	3.81258e-30	7.89823e-14	1.62498e-16	2.28996e-24	4.14745e-34
		1.92453e-06	1.95702e-06	9.65837e-08	4.87715e-08	2.18243e-05	7.15059e-05	1.59331e-06	2.83548e-05	7.17131e-06	5.45737e-05	1.59159e-05	2.03732e-07	5.20901e-08	2.47442e-08	1.41236e-10	5.16897e-11	1.82773e-07	6.16338e-07	6.8352e-10	3.24401e-09	3.65711e-07	1.16448e-06	4.39155e-08	2.50492e-10	2.24178e-10	7.82064e-11	1.66577e-13	1.47143e-14	2.29142e-09	1.07135e-08	3.30386e-12	1.23277e-09	8.69873e-09	1.30746e-08	3.57868e-10	1.10274e-13	1.22756e-12	1.17451e-13	1.08924e-16	7.60966e-19	1.87403e-11	9.97316e-11	4.46839e-15	4.0535e-13	1.9121e-10	8.53184e-10	5.66615e-12	5.57236e-15
		NA	NA	NA	NA	NA	NA	NA	NA	NA	NA	NA	NA	NA	NA	NA	NA	NA	NA	NA	NA	NA	NA	NA	NA	NA	NA	NA	NA	NA	NA	NA	NA	NA	NA	NA	NA	NA	NA	NA	NA	NA	NA	NA	NA	NA	NA	NA	NA
		0.995921	0.995921	0.995921	0.995921	0.990053	0.990053	0.990053	0.990053	0.990235	0.990235	0.990235	0.990235	0.995921	0.995921	0.995921	0.995921	0.990053	0.990053	0.990053	0.990053	0.990235	0.990235	0.990235	0.990235	0.995921	0.995921	0.995921	0.995921	0.990053	0.990053	0.990053	0.990053	0.990235	0.990235	0.990235	0.990235	0.995921	0.995921	0.995921	0.995921	0.990053	0.990053	0.990053	0.990053	0.990235	0.990235	0.990235	0.990235
		1	1	1	1	1	1	1	1	1	1	1	1	1	1	1	1	1	1	1	1	1	1	1	1	1	1	1	1	1	1	1	1	1	1	1	1	1	1	1	1	1	1	1	1	1	1	1	1
		NA	NA	NA	NA	NA	NA	NA	NA	NA	NA	NA	NA	NA	NA	NA	NA	NA	NA	NA	NA	NA	NA	NA	NA	NA	NA	NA	NA	NA	NA	NA	NA	NA	NA	NA	NA	NA	NA	NA	NA	NA	NA	NA	NA	NA	NA	NA	NA
		0.99887	0.99887	0.99887	0.99887	0.99692	0.99692	0.99692	0.99692	0.996789	0.996789	0.996789	0.996789	0.99887	0.99887	0.99887	0.99887	0.99692	0.99692	0.99692	0.99692	0.996789	0.996789	0.996789	0.996789	0.99887	0.99887	0.99887	0.99887	0.99692	0.99692	0.99692	0.99692	0.996789	0.996789	0.996789	0.996789	0.99887	0.99887	0.99887	0.99887	0.99692	0.99692	0.99692	0.99692	0.996789	0.996789	0.996789	0.996789
		1	1	1	1	1	1	1	1	1	1	1	1	1	1	1	1	1	1	1	1	1	1	1	1	1	1	1	1	1	1	1	1	1	1	1	1	1	1	1	1	1	1	1	1	1	1	1	1
		NA	NA	NA	NA	NA	NA	NA	NA	NA	NA	NA	NA	NA	NA	NA	NA	NA	NA	NA	NA	NA	NA	NA	NA	NA	NA	NA	NA	NA	NA	NA	NA	NA	NA	NA	NA	NA	NA	NA	NA	NA	NA	NA	NA	NA	NA	NA	NA
		4.4939e-19	2.79321e-18	3.39826e-18	1.5108e-18	0.442559	0.36896	0.361052	0.415785	0.994951	0.994951	0.994951	0.994951	2.01356e-16	7.42256e-16	1.15331e-15	8.23522e-16	0.252328	0.218487	0.183356	0.228006	0.994951	0.994951	0.994951	0.994951	1.76182e-16	5.84365e-16	8.17977e-16	6.04082e-16	0.369889	0.318274	0.278786	0.329722	0.994951	0.994951	0.994951	0.994951	7.71233e-17	1.56028e-16	9.77809e-17	8.6745e-17	0.569722	0.516139	0.442422	0.491291	0.994951	0.994951	0.994951	0.994951
		0.575152	0.48775	0.561116	0.588332	5.18927e-05	2.48508e-05	1.73482e-05	2.23915e-05	1	1	1	1	0.377424	0.337741	0.371456	0.356894	1.35224e-05	8.06059e-06	3.225e-06	5.00042e-06	1	1	1	1	0.492708	0.455727	0.505951	0.484439	5.59648e-05	3.17441e-05	1.47507e-05	2.01271e-05	1	1	1	1	0.302428	0.251731	0.284696	0.255697	0.000310373	0.000207089	8.71259e-05	9.92436e-05	1	1	1	1
		NA	NA	NA	NA	NA	NA	NA	NA	NA	NA	NA	NA	NA	NA	NA	NA	NA	NA	NA	NA	NA	NA	NA	NA	NA	NA	NA	NA	NA	NA	NA	NA	NA	NA	NA	NA	NA	NA	NA	NA	NA	NA	NA	NA	NA	NA	NA	NA
		0.998007	0.945366	0.0273652	0.0165891	0.999465	0.00902875	0.0360953	0.324384	0.992196	0.992196	3.52368e-12	2.88464e-11	0.998007	0.804042	0.0107267	0.0225176	0.999465	0.00902875	0.0991332	0.131057	0.992196	0.992196	1.11057e-13	1.45644e-12	0.998007	0.580604	0.00930265	0.011404	0.999465	0.00902875	0.452858	0.0743303	0.992196	0.992196	1.84347e-14	1.10344e-13	0.998007	0.397975	0.00649994	0.00417988	0.999465	0.017925	0.471791	0.0886372	0.992196	0.992196	7.83124e-16	2.01644e-14
		1	0.00362147	0.0507273	0.561595	1	0.822777	0.0333574	0.00011444	1	1	0.00710907	1.60571e-05	1	0.0058807	0.0946071	0.466013	1	0.822777	0.0129186	1.81898e-05	1	1	0.000957097	3.29452e-06	1	0.00940879	0.103418	0.630719	1	0.822777	0.00145615	6.58233e-06	1	1	0.000297279	3.14718e-07	1	0.0147735	0.127923	0.886695	1	0.705867	0.00134166	8.9478e-06	1	1	2.97513e-05	7.56323e-08
		NA	NA	NA	NA	NA	NA	NA	NA	NA	NA	NA	NA	NA	NA	NA	NA	NA	NA	NA	NA	NA	NA	NA	NA	NA	NA	NA	NA	NA	NA	NA	NA	NA	NA	NA	NA	NA	NA	NA	NA	NA	NA	NA	NA	NA	NA	NA	NA
		0.996433	0.996433	0.996433	0.996433	0.99624	0.99624	0.99624	0.99624	0.996433	0.996433	0.996433	0.996433	0.996433	0.996433	0.996433	0.996433	0.99624	0.99624	0.99624	0.99624	0.996433	0.996433	0.996433	0.996433	0.996433	0.996433	0.996433	0.996433	0.99624	0.99624	0.99624	0.99624	0.996433	0.996433	0.996433	0.996433	0.996433	0.996433	0.996433	0.996433	0.99624	0.99624	0.99624	0.99624	0.996433	0.996433	0.996433	0.996433
		1	1	1	1	1	1	1	1	1	1	1	1	1	1	1	1	1	1	1	1	1	1	1	1	1	1	1	1	1	1	1	1	1	1	1	1	1	1	1	1	1	1	1	1	1	1	1	1
		NA	NA	NA	NA	NA	NA	NA	NA	NA	NA	NA	NA	NA	NA	NA	NA	NA	NA	NA	NA	NA	NA	NA	NA	NA	NA	NA	NA	NA	NA	NA	NA	NA	NA	NA	NA	NA	NA	NA	NA	NA	NA	NA	NA	NA	NA	NA	NA
		0.902071	0.0265657	1.57291e-06	1.07285e-09	0.78188	0.0105446	4.84034e-07	4.57342e-13	0.684893	0.0458817	0.00016752	3.28876e-09	0.749335	0.0613722	2.73576e-05	1.97891e-08	0.787464	0.00961225	1.38821e-06	9.18525e-12	0.771851	0.0868782	0.00177644	7.32839e-09	0.646839	0.00735762	2.12449e-07	9.35109e-12	0.592614	0.00114797	6.53153e-08	1.01711e-13	0.330905	0.00723798	7.86679e-06	7.67478e-11	0.995247	0.0332839	2.95872e-06	4.22078e-09	0.535383	0.0204419	8.82327e-06	1.82646e-10	0.95074	0.0615421	0.000392279	1.74062e-07
		4.62217e-14	3.92546e-13	5.65515e-10	7.1349e-08	6.45597e-16	1.73484e-13	5.23801e-09	5.45664e-06	1.9739e-13	1.8009e-13	1.97544e-14	3.20686e-09	1.18716e-11	8.64626e-10	5.20543e-07	0.000169832	3.98056e-12	6.56377e-09	9.9867e-06	0.00268033	1.5922e-10	3.61409e-10	9.69589e-11	1.47508e-05	3.74612e-12	5.3463e-08	2.9328e-05	0.00442619	9.68375e-10	1.47415e-07	5.55273e-05	0.00763393	4.33603e-09	1.23605e-07	1.88659e-07	0.000180754	2.52703e-11	1.22059e-09	2.3535e-06	8.61653e-05	2.02232e-13	3.037e-10	3.22237e-07	0.000154468	1.29819e-11	1.10097e-09	1.05747e-09	5.88715e-07
		NA	NA	NA	NA	NA	NA	NA	NA	NA	NA	NA	NA	NA	NA	NA	NA	NA	NA	NA	NA	NA	NA	NA	NA	NA	NA	NA	NA	NA	NA	NA	NA	NA	NA	NA	NA	NA	NA	NA	NA	NA	NA	NA	NA	NA	NA	NA	NA
		0.999062	0.999062	0.999062	0.999062	0.999764	0.999764	0.999764	0.999764	0.997474	0.997474	0.997474	0.997474	0.999062	0.999062	0.999062	0.999062	0.999764	0.999764	0.999764	0.999764	0.997474	0.997474	0.997474	0.997474	0.999062	0.999062	0.999062	0.999062	0.999764	0.999764	0.999764	0.999764	0.997474	0.997474	0.997474	0.997474	0.999062	0.999062	0.999062	0.999062	0.999764	0.999764	0.999764	0.999764	0.997474	0.997474	0.997474	0.997474
		1	1	1	1	1	1	1	1	1	1	1	1	1	1	1	1	1	1	1	1	1	1	1	1	1	1	1	1	1	1	1	1	1	1	1	1	1	1	1	1	1	1	1	1	1	1	1	1
		NA	NA	NA	NA	NA	NA	NA	NA	NA	NA	NA	NA	NA	NA	NA	NA	NA	NA	NA	NA	NA	NA	NA	NA	NA	NA	NA	NA	NA	NA	NA	NA	NA	NA	NA	NA	NA	NA	NA	NA	NA	NA	NA	NA	NA	NA	NA	NA
		8.65124e-07	7.41799e-12	3.80172e-15	2.95121e-22	5.01637e-09	1.0947e-10	2.4853e-17	9.28604e-23	2.68167e-12	6.23032e-17	2.80983e-19	1.24982e-21	1.57803e-07	7.59294e-14	1.35738e-18	2.14411e-27	4.99689e-10	1.45345e-12	4.19645e-21	4.56973e-30	6.41731e-14	5.16179e-20	1.26544e-23	3.60405e-28	7.53941e-08	5.58391e-14	1.01601e-19	3.10457e-30	1.38845e-10	6.36142e-13	4.75759e-21	9.16397e-32	1.28138e-14	3.58306e-21	2.49439e-25	2.93816e-29	2.65655e-08	4.42723e-15	3.09927e-20	4.39368e-30	4.74533e-11	1.51791e-13	6.39757e-22	2.64571e-32	2.10121e-14	2.462e-21	4.41539e-25	1.09808e-30
		3.67441e-07	6.69118e-09	3.81114e-08	5.58711e-09	1.47367e-09	6.6668e-09	8.39208e-11	1.833e-10	2.40165e-11	1.81707e-11	6.81106e-10	2.60048e-07	7.37744e-08	1.79432e-10	1.81906e-10	5.37697e-12	1.73034e-10	2.16859e-10	1.51748e-13	6.53714e-15	9.86706e-13	9.38664e-14	9.11887e-13	7.32909e-11	3.69573e-08	1.40838e-10	2.40854e-11	5.75578e-14	5.33026e-11	9.48689e-11	1.66311e-13	3.60427e-16	2.51776e-13	1.30059e-14	6.21015e-14	1.16654e-11	1.39999e-08	1.91655e-11	1.03667e-11	3.63439e-14	1.99835e-11	2.93025e-11	3.84048e-14	1.17144e-16	3.8264e-13	9.85097e-15	9.18718e-14	1.49253e-12
		NA	NA	NA	NA	NA	NA	NA	NA	NA	NA	NA	NA	NA	NA	NA	NA	NA	NA	NA	NA	NA	NA	NA	NA	NA	NA	NA	NA	NA	NA	NA	NA	NA	NA	NA	NA	NA	NA	NA	NA	NA	NA	NA	NA	NA	NA	NA	NA
		0.996363	0.996363	0.996363	0.996363	0.993536	0.993536	0.993536	0.993536	0.996124	0.996124	0.996124	0.996124	0.996363	0.996363	0.996363	0.996363	0.993536	0.993536	0.993536	0.993536	0.996124	0.996124	0.996124	0.996124	0.996363	0.996363	0.996363	0.996363	0.993536	0.993536	0.993536	0.993536	0.996124	0.996124	0.996124	0.996124	0.996363	0.996363	0.996363	0.996363	0.993536	0.993536	0.993536	0.993536	0.996124	0.996124	0.996124	0.996124
		1	1	1	1	1	1	1	1	1	1	1	1	1	1	1	1	1	1	1	1	1	1	1	1	1	1	1	1	1	1	1	1	1	1	1	1	1	1	1	1	1	1	1	1	1	1	1	1
		NA	NA	NA	NA	NA	NA	NA	NA	NA	NA	NA	NA	NA	NA	NA	NA	NA	NA	NA	NA	NA	NA	NA	NA	NA	NA	NA	NA	NA	NA	NA	NA	NA	NA	NA	NA	NA	NA	NA	NA	NA	NA	NA	NA	NA	NA	NA	NA
		0.738601	0.084649	0.00273201	6.8729e-08	0.532936	0.10343	0.00139635	7.0921e-07	0.572587	0.0567459	0.00134677	1.52508e-05	0.780835	0.0167542	0.000511515	6.45261e-08	0.890968	0.0348325	0.00028521	2.46238e-07	0.947278	0.0227998	0.000590589	8.86169e-06	0.374589	0.0109047	0.000225086	8.97118e-08	0.585137	0.0133183	6.6112e-05	2.79189e-08	0.279447	0.00517166	0.000176911	8.48432e-07	0.145573	0.000681137	5.30972e-05	4.37367e-08	0.32044	0.0012716	6.26633e-06	1.1742e-08	0.177995	0.00326109	4.35035e-05	3.15985e-08
		1.12749e-06	0.000238236	0.00105193	0.0317049	2.44825e-07	0.00027553	0.00411398	0.0102654	3.14046e-07	0.000411562	0.00206306	0.00247682	3.19759e-05	0.00423623	0.0077738	0.0472891	4.51334e-06	0.00210802	0.0182581	0.0229409	7.11545e-06	0.00280926	0.00891434	0.0058873	0.000812415	0.00975781	0.0181047	0.0363015	0.000225069	0.0107061	0.0612938	0.0616663	0.00149582	0.0173263	0.0222381	0.0216461	0.00742936	0.0997263	0.0581866	0.0625837	0.00166426	0.0921678	0.212456	0.119295	0.00657627	0.0343985	0.0594213	0.10633
		NA	NA	NA	NA	NA	NA	NA	NA	NA	NA	NA	NA	NA	NA	NA	NA	NA	NA	NA	NA	NA	NA	NA	NA	NA	NA	NA	NA	NA	NA	NA	NA	NA	NA	NA	NA	NA	NA	NA	NA	NA	NA	NA	NA	NA	NA	NA	NA
		3.30787e-52	3.86072e-48	1.36818e-42	2.9253e-28	1.0612e-21	8.37789e-24	1.06135e-27	1.05612e-31	9.5712e-15	2.66027e-17	1.17739e-10	1.10244e-21	4.79542e-97	2.669e-114	4.37871e-133	7.65285e-101	1.83495e-42	1.56486e-76	1.06308e-127	3.50994e-156	6.4148e-19	1.26992e-34	4.1713e-42	1.60545e-62	4.42745e-61	1.31348e-63	5.10152e-70	1.58606e-54	3.3336e-32	5.46204e-53	7.9377e-79	1.0655e-92	3.19189e-17	3.39892e-28	2.06313e-32	4.09041e-20	5.59361e-30	8.47391e-45	2.03691e-48	5.40011e-20	1.21267e-06	2.33683e-16	8.42456e-30	3.33057e-44	0.252619	0.00192308	3.587e-08	5.69392e-18
		8.71341e-06	0.000180381	0.0686306	0.000555635	0.581921	0.845074	0.720144	0.825235	0.0875651	0.171813	0.000690935	0.082137	1.01468e-19	3.3642e-23	2.50967e-28	1.14813e-07	3.17194e-05	5.93956e-14	1.75533e-29	8.64789e-36	0.953637	0.0165159	0.00102415	1.48504e-07	6.29271e-11	1.21911e-07	6.57872e-07	0.963894	0.00576119	7.52302e-07	1.34903e-12	5.21134e-14	0.634	0.118031	0.0504538	0.679203	0.00208197	2.96108e-07	4.44084e-07	0.183609	0.0154496	0.592032	0.00131296	4.69221e-07	1.96698e-11	9.39831e-07	0.012458	0.933454
		NA	NA	NA	NA	NA	NA	NA	NA	NA	NA	NA	NA	NA	NA	NA	NA	NA	NA	NA	NA	NA	NA	NA	NA	NA	NA	NA	NA	NA	NA	NA	NA	NA	NA	NA	NA	NA	NA	NA	NA	NA	NA	NA	NA	NA	NA	NA	NA
		6.19561e-50	6.72761e-64	7.65523e-54	1.48337e-62	3.29923e-50	6.24044e-66	1.48355e-86	1.57954e-100	4.56842e-32	7.30711e-42	9.53204e-62	2.21704e-76	1.44486e-39	7.18671e-49	2.09296e-40	1.35854e-49	1.74108e-37	1.82919e-50	1.61236e-72	6.83243e-83	1.11727e-26	1.34135e-35	1.86546e-54	3.5006e-67	2.99089e-45	5.1742e-54	6.46307e-47	6.23945e-55	7.13429e-38	1.40541e-54	1.99071e-73	2.24197e-83	5.87138e-27	1.23262e-36	2.02383e-56	8.71731e-68	3.68926e-57	3.39719e-72	3.23272e-68	5.5122e-75	3.09642e-38	9.19936e-53	2.82197e-72	4.80612e-83	5.44345e-27	1.92242e-37	2.7924e-56	1.33184e-70
		4.04087e-05	1.00626e-07	0.000755723	0.00425016	0.000117949	2.48074e-06	3.48734e-11	1.99707e-12	4.60733e-05	1.85281e-05	1.37017e-07	6.72795e-07	0.00910124	0.000750112	0.147288	0.0721471	0.0465716	0.01	4.67542e-07	2.37248e-07	0.00160031	0.000654262	1.43711e-05	0.000122096	8.5604e-05	7.07321e-06	0.00241033	0.000456848	0.0378512	0.0007547	7.15462e-08	7.85308e-08	0.00100599	0.000209299	1.52005e-06	3.74589e-05	1.03333e-08	3.71538e-11	4.26017e-07	4.55286e-07	0.0261345	0.000868418	3.16696e-08	4.01059e-09	0.000755045	0.0001045	6.66839e-07	2.58157e-06
		NA	NA	NA	NA	NA	NA	NA	NA	NA	NA	NA	NA	NA	NA	NA	NA	NA	NA	NA	NA	NA	NA	NA	NA	NA	NA	NA	NA	NA	NA	NA	NA	NA	NA	NA	NA	NA	NA	NA	NA	NA	NA	NA	NA	NA	NA	NA	NA
		8.55168e-283	0	0	0	2.60198e-228	1.21031e-260	1.87098e-275	0	3.63531e-292	5.70384e-294	5.9334e-303	0	0	0	0	0	0	0	0	0	0	0	0	0	0	0	0	0	0	0	0	0	0	0	0	0	0	0	0	0	0	0	0	0	0	0	0	0
		5.83335e-11	9.45414e-07	0.00502765	0.00897513	0.00920008	0.0900215	0.11206	0.343478	0.000197654	2.1349e-08	3.52642e-08	2.79329e-08	2.60035e-05	0.0364514	0.596158	0.272208	0.417751	0.714464	0.336567	0.052751	1.64228e-07	4.01482e-08	5.29236e-08	2.66979e-08	0.253949	0.120059	0.00019267	0.114196	0.750014	0.250439	0.02341	0.012122	1.35733e-08	4.88452e-12	5.45247e-12	2.83532e-08	0.096415	1.90573e-20	2.21995e-30	3.99862e-31	5.11603e-06	5.30416e-10	4.37752e-15	7.86301e-16	2.96068e-09	2.56388e-10	2.73121e-12	1.22096e-08
		NA	NA	NA	NA	NA	NA	NA	NA	NA	NA	NA	NA	NA	NA	NA	NA	NA	NA	NA	NA	NA	NA	NA	NA	NA	NA	NA	NA	NA	NA	NA	NA	NA	NA	NA	NA	NA	NA	NA	NA	NA	NA	NA	NA	NA	NA	NA	NA
		0.997979	0.0299414	0.884292	0.0245723	0.99618	0.99618	0.26511	0.00744839	0.996528	0.996528	0.267602	0.140591	0.997979	0.0352037	0.88292	0.0123632	0.99618	0.99618	0.393888	0.00400315	0.996528	0.996528	0.222289	0.137736	0.997979	0.0373341	0.974642	0.0134324	0.99618	0.99618	0.555638	0.00845372	0.996528	0.996528	0.175761	0.280495	0.997979	0.0689596	0.989297	0.010793	0.99618	0.99618	0.603487	0.0108406	0.996528	0.996528	0.149637	0.322397
		1	0.0519458	0.000190334	1.86652e-05	1	1	0.00263756	1.41889e-08	1	1	0.00786069	1.6261e-06	1	0.0446658	0.00018908	6.35643e-06	1	1	0.00106023	4.67797e-09	1	1	0.0112031	1.5496e-06	1	0.0421964	0.00029168	7.22394e-06	1	1	0.000391329	1.78736e-08	1	1	0.0166777	9.0257e-06	1	0.0215784	0.000344538	5.16142e-06	1	1	0.000296242	2.82687e-08	1	1	0.0213034	1.30901e-05
		NA	NA	NA	NA	NA	NA	NA	NA	NA	NA	NA	NA	NA	NA	NA	NA	NA	NA	NA	NA	NA	NA	NA	NA	NA	NA	NA	NA	NA	NA	NA	NA	NA	NA	NA	NA	NA	NA	NA	NA	NA	NA	NA	NA	NA	NA	NA	NA
		1.90672e-08	1.8571e-05	0.000129358	4.68082e-13	3.24724e-09	8.32423e-12	3.45765e-18	1.62095e-25	2.59731e-08	5.88262e-09	1.21439e-08	7.48092e-07	1.1137e-06	3.4935e-05	5.45521e-06	0.104311	8.52559e-07	0.0856269	0.00684826	1.2957e-06	0.00014738	0.000557094	0.0313438	0.295948	9.94319e-12	0.0208606	0.0544168	7.95936e-05	0.068482	0.439488	0.23212	0.00796138	0.000310119	0.000649468	0.0134712	0.0128406	1.29716e-27	2.4671e-28	4.54588e-33	2.96557e-50	3.47803e-27	2.91643e-36	2.26193e-45	1.39557e-56	2.2876e-07	2.32549e-06	0.000136731	5.86623e-05
		1.14723e-08	7.96796e-16	8.55945e-22	3.8434e-13	5.73261e-16	1.80613e-19	5.6108e-15	9.93609e-07	0.000790839	5.24034e-06	1.67698e-08	7.01257e-16	5.50904e-06	1.90362e-09	1.06437e-11	2.47669e-19	5.4958e-14	1.50776e-28	5.19925e-26	6.03361e-15	0.00087229	5.33009e-06	2.40469e-11	1.30618e-17	0.016018	1.00125e-09	1.07416e-13	9.19094e-13	4.47789e-18	1.10934e-25	8.12463e-27	2.17297e-20	0.00102208	7.4928e-06	6.31558e-12	3.57301e-14	0.331748	0.36432	0.441018	0.00682588	0.210965	0.42172	0.679995	0.196048	0.117128	0.00363195	3.92801e-07	7.26232e-08
		NA	NA	NA	NA	NA	NA	NA	NA	NA	NA	NA	NA	NA	NA	NA	NA	NA	NA	NA	NA	NA	NA	NA	NA	NA	NA	NA	NA	NA	NA	NA	NA	NA	NA	NA	NA	NA	NA	NA	NA	NA	NA	NA	NA	NA	NA	NA	NA
		0.999208	0.999208	0.999208	0.999208	0.995709	0.995709	0.995709	0.995709	0.999256	0.999256	0.999256	0.999256	0.999208	0.999208	0.999208	0.999208	0.995709	0.995709	0.995709	0.995709	0.999256	0.999256	0.999256	0.999256	0.999208	0.999208	0.999208	0.999208	0.995709	0.995709	0.995709	0.995709	0.999256	0.999256	0.999256	0.999256	0.999208	0.999208	0.999208	0.999208	0.995709	0.995709	0.995709	0.995709	0.999256	0.999256	0.999256	0.999256
		1	1	1	1	1	1	1	1	1	1	1	1	1	1	1	1	1	1	1	1	1	1	1	1	1	1	1	1	1	1	1	1	1	1	1	1	1	1	1	1	1	1	1	1	1	1	1	1
		NA	NA	NA	NA	NA	NA	NA	NA	NA	NA	NA	NA	NA	NA	NA	NA	NA	NA	NA	NA	NA	NA	NA	NA	NA	NA	NA	NA	NA	NA	NA	NA	NA	NA	NA	NA	NA	NA	NA	NA	NA	NA	NA	NA	NA	NA	NA	NA
		0.999422	0.999422	0.999422	0.999422	0.998526	0.998526	0.995063	0.995063	0.994859	0.994859	0.999492	0.999492	0.999422	0.999422	0.999422	0.999422	0.998526	0.998526	0.995063	0.995063	0.994859	0.994859	0.999492	0.999492	0.999422	0.999422	0.999422	0.999422	0.998526	0.998526	0.995063	0.995063	0.994859	0.994859	0.999492	0.999492	0.999422	0.999422	0.999422	0.999422	0.998526	0.998526	0.995063	0.995063	0.994859	0.994859	0.999492	0.999492
		1	1	1	1	1	1	1	1	1	1	1	1	1	1	1	1	1	1	1	1	1	1	1	1	1	1	1	1	1	1	1	1	1	1	1	1	1	1	1	1	1	1	1	1	1	1	1	1
		NA	NA	NA	NA	NA	NA	NA	NA	NA	NA	NA	NA	NA	NA	NA	NA	NA	NA	NA	NA	NA	NA	NA	NA	NA	NA	NA	NA	NA	NA	NA	NA	NA	NA	NA	NA	NA	NA	NA	NA	NA	NA	NA	NA	NA	NA	NA	NA
		1.06138e-283	7.77439e-286	4.787e-261	1.15487e-294	2.03564e-281	4.69616e-281	6.69043e-245	4.59022e-254	1.81876e-225	2.16284e-286	2.0664e-290	1.7659e-294	6.16666e-227	8.60321e-267	7.60791e-296	0	2.19371e-245	9.86396e-257	3.10295e-244	1.17183e-233	3.65851e-244	7.77431e-229	1.14891e-245	1.05732e-271	0	0	0	0	0	0	0	0	0	1.64602e-286	0	0	0	0	0	0	0	0	0	0	0	2.87408e-299	0	0
		0.000406558	0.000126998	0.00069712	1.99251e-05	1.19732e-05	1.10667e-05	0.0215496	0.0172402	0.000108777	9.31911e-08	2.7662e-09	1.09609e-08	0.488087	0.470937	0.0415734	0.00819503	0.680152	0.924434	0.115183	0.0338895	0.022816	0.418656	0.193856	0.0588959	0.127107	0.966077	0.150961	0.957681	0.141674	0.693828	0.0783177	0.00840691	0.00877515	0.938763	0.443048	0.289596	0.736088	0.00134753	0.000255333	1.76359e-09	0.301245	0.683262	0.000636647	4.7774e-05	0.000390909	0.400288	0.686342	0.643704
		NA	NA	NA	NA	NA	NA	NA	NA	NA	NA	NA	NA	NA	NA	NA	NA	NA	NA	NA	NA	NA	NA	NA	NA	NA	NA	NA	NA	NA	NA	NA	NA	NA	NA	NA	NA	NA	NA	NA	NA	NA	NA	NA	NA	NA	NA	NA	NA
		1.80161e-08	2.66556e-06	3.13726e-06	1.10879e-08	1.14703e-07	1.08224e-06	8.4908e-06	1.10671e-08	8.24012e-08	9.60902e-07	4.55606e-06	1.45854e-08	2.50511e-08	1.99907e-06	6.09715e-07	1.63234e-10	1.00854e-07	2.03539e-06	2.23615e-06	6.53904e-11	7.76397e-08	2.76042e-06	1.84262e-06	3.20742e-10	1.61799e-08	1.10459e-06	2.94191e-07	1.36142e-11	1.10028e-07	1.15676e-06	1.75555e-06	1.84624e-11	5.32361e-08	1.96118e-06	8.77679e-07	4.45511e-11	1.44977e-08	4.93752e-07	3.28109e-07	1.91913e-11	1.24525e-07	4.42565e-07	1.42902e-06	2.68911e-11	5.39203e-08	8.58833e-07	7.43194e-07	1.19795e-10
		5.64645e-08	6.84071e-05	0.00075825	0.000539787	2.68076e-08	1.31431e-05	0.000634248	0.000254014	2.7878e-08	1.58848e-05	0.000495679	0.000301328	7.57466e-08	5.96895e-05	0.000277051	4.48291e-05	2.36914e-08	2.49653e-05	0.000274561	1.20829e-05	2.63446e-08	3.88381e-05	0.000273392	3.09748e-05	5.13102e-08	3.65999e-05	0.00014469	7.47046e-06	2.57571e-08	1.54154e-05	0.000206341	3.84218e-06	1.84126e-08	2.90686e-05	0.000154685	7.23424e-06	4.65339e-08	1.8845e-05	0.00012569	6.96516e-06	2.90099e-08	6.7986e-06	0.000175944	4.96992e-06	1.8637e-08	1.44443e-05	0.000122526	1.23162e-05
		NA	NA	NA	NA	NA	NA	NA	NA	NA	NA	NA	NA	NA	NA	NA	NA	NA	NA	NA	NA	NA	NA	NA	NA	NA	NA	NA	NA	NA	NA	NA	NA	NA	NA	NA	NA	NA	NA	NA	NA	NA	NA	NA	NA	NA	NA	NA	NA
		5.00928e-30	3.50301e-27	6.47758e-23	2.0496e-12	5.70514e-17	1.07166e-21	7.18331e-29	2.94783e-28	2.90735e-20	2.82394e-22	2.03117e-25	9.42279e-22	3.4621e-31	6.34493e-27	6.34806e-22	1.45221e-12	6.40004e-18	4.59677e-22	1.45239e-30	1.4444e-31	5.08207e-22	4.39541e-24	3.65129e-28	4.26063e-27	4.89904e-39	1.40641e-42	2.20477e-40	1.68047e-27	3.67039e-25	1.50232e-34	2.09071e-44	9.68171e-49	9.53483e-21	6.4387e-22	4.01428e-25	1.37975e-24	6.05398e-51	8.72264e-56	1.46641e-54	9.50538e-44	6.12718e-41	5.33471e-54	1.00681e-67	1.19036e-79	3.60049e-24	8.11971e-28	6.9782e-35	1.3626e-33
		1.0506e-15	2.57244e-08	0.0309078	0.0652304	3.18625e-08	1.54464e-07	1.81286e-07	0.00121466	6.56734e-08	4.06128e-06	0.000179584	0.0387188	4.04733e-16	3.33191e-08	0.0524804	0.0614038	1.46878e-08	1.93201e-07	3.62278e-08	0.00021847	6.71929e-09	3.51431e-07	5.08107e-06	0.000226672	2.75321e-22	1.27907e-16	8.72195e-09	0.018886	7.91692e-13	9.99461e-14	1.59573e-15	1.74739e-12	3.40615e-09	6.69112e-07	3.40427e-05	0.00303405	8.18865e-29	5.33182e-22	4.33572e-12	4.19681e-06	4.3073e-21	2.54082e-22	8.40251e-24	2.95966e-22	4.34204e-10	5.99091e-08	3.70969e-07	0.000239767
		NA	NA	NA	NA	NA	NA	NA	NA	NA	NA	NA	NA	NA	NA	NA	NA	NA	NA	NA	NA	NA	NA	NA	NA	NA	NA	NA	NA	NA	NA	NA	NA	NA	NA	NA	NA	NA	NA	NA	NA	NA	NA	NA	NA	NA	NA	NA	NA
		0.997754	0.997754	0.997754	0.997754	0.991655	0.991655	0.991655	0.991655	0.998898	0.998898	0.998898	0.998898	0.997754	0.997754	0.997754	0.997754	0.991655	0.991655	0.991655	0.991655	0.998898	0.998898	0.998898	0.998898	0.997754	0.997754	0.997754	0.997754	0.991655	0.991655	0.991655	0.991655	0.998898	0.998898	0.998898	0.998898	0.997754	0.997754	0.997754	0.997754	0.991655	0.991655	0.991655	0.991655	0.998898	0.998898	0.998898	0.998898
		1	1	1	1	1	1	1	1	1	1	1	1	1	1	1	1	1	1	1	1	1	1	1	1	1	1	1	1	1	1	1	1	1	1	1	1	1	1	1	1	1	1	1	1	1	1	1	1
		NA	NA	NA	NA	NA	NA	NA	NA	NA	NA	NA	NA	NA	NA	NA	NA	NA	NA	NA	NA	NA	NA	NA	NA	NA	NA	NA	NA	NA	NA	NA	NA	NA	NA	NA	NA	NA	NA	NA	NA	NA	NA	NA	NA	NA	NA	NA	NA
		3.40328e-82	7.04762e-95	9.2155e-86	9.43561e-90	1.46542e-77	4.61796e-92	3.55078e-101	9.17691e-74	1.80888e-95	8.5223e-107	1.08225e-92	1.02088e-66	3.43328e-113	3.96029e-105	4.27029e-109	5.3955e-84	6.55388e-135	1.32929e-135	6.56578e-149	2.92833e-95	4.97463e-94	6.83348e-119	4.4145e-116	2.9598e-128	2.75507e-183	3.69907e-197	8.85825e-203	4.61474e-204	1.74894e-187	2.71498e-168	7.81568e-221	1.04908e-132	6.03087e-148	1.36169e-204	5.76521e-157	6.58085e-164	1.04703e-108	2.60317e-124	2.13137e-128	1.64205e-125	5.41996e-123	7.33991e-130	4.69781e-122	9.90443e-114	4.98997e-93	2.02176e-102	1.04719e-80	8.09318e-81
		9.06708e-06	3.2186e-09	2.43389e-05	0.000167511	0.00170018	2.5511e-05	1.55442e-05	0.00596177	9.89521e-08	3.27641e-08	7.86697e-08	0.00203666	1.15715e-19	4.08186e-18	1.20893e-17	3.42405e-09	1.88368e-17	3.3937e-10	4.25213e-11	1.9248e-06	1.45597e-08	5.84238e-19	8.55894e-24	3.84863e-27	2.14584e-26	3.40712e-32	2.97683e-36	2.52754e-39	6.68716e-31	2.88524e-25	2.76839e-29	2.39971e-44	8.43697e-17	9.26615e-33	1.0359e-21	2.40044e-28	0.0056007	7.04244e-05	0.00116992	0.00339674	5.26085e-08	5.3019e-09	0.000165974	0.00320728	1.90024e-05	1.20992e-05	0.000300874	0.00616782
		NA	NA	NA	NA	NA	NA	NA	NA	NA	NA	NA	NA	NA	NA	NA	NA	NA	NA	NA	NA	NA	NA	NA	NA	NA	NA	NA	NA	NA	NA	NA	NA	NA	NA	NA	NA	NA	NA	NA	NA	NA	NA	NA	NA	NA	NA	NA	NA
		0.0108956	0.0174038	0.858723	0.746593	2.67931e-05	0.00013429	0.158558	0.041766	5.0188e-06	0.00239485	0.0673042	0.408298	0.0376704	0.0311082	0.270281	0.520347	0.00925293	0.0581215	0.251487	0.283837	0.00216893	0.00158029	0.028736	0.178149	2.15987e-05	1.26215e-10	3.21426e-10	1.67752e-20	7.80151e-06	1.12835e-05	8.70945e-11	6.22632e-17	3.01809e-05	1.26565e-08	8.88471e-15	7.14636e-24	4.49401e-05	3.93947e-06	2.70434e-07	7.98024e-12	0.00012522	0.00032278	2.54757e-07	1.10229e-07	7.14302e-06	5.9e-08	1.62069e-14	7.52467e-14
		1.74872e-25	1.2892e-32	6.05727e-50	7.88942e-54	6.79757e-19	4.09794e-25	2.85535e-38	6.08978e-39	3.05733e-19	2.11621e-26	2.67177e-34	4.08654e-50	2.44052e-28	9.43129e-34	8.27354e-44	7.1602e-49	7.0177e-27	1.05461e-33	1.42944e-39	4.90356e-46	9.42897e-25	1.12258e-26	3.34079e-36	2.16211e-41	4.02635e-20	2.11528e-16	6.51756e-18	1.19342e-11	4.67983e-20	1.49753e-23	1.76294e-17	3.15111e-16	1.5038e-20	2.37253e-18	2.09818e-16	4.74532e-13	2.03786e-20	2.0521e-22	5.96391e-23	8.42703e-19	3.03986e-22	5.1064e-27	1.36279e-21	7.35153e-27	9.5626e-18	1.26912e-17	5.70953e-14	8.62481e-19
		NA	NA	NA	NA	NA	NA	NA	NA	NA	NA	NA	NA	NA	NA	NA	NA	NA	NA	NA	NA	NA	NA	NA	NA	NA	NA	NA	NA	NA	NA	NA	NA	NA	NA	NA	NA	NA	NA	NA	NA	NA	NA	NA	NA	NA	NA	NA	NA
		1.47426e-31	1.05243e-40	5.36856e-41	1.01182e-45	3.28855e-24	2.84559e-34	2.64433e-38	8.54631e-36	1.28115e-25	1.43122e-28	2.95656e-30	9.43098e-30	2.56157e-41	1.16043e-54	1.16405e-60	2.2308e-70	7.81234e-30	2.53031e-42	2.55732e-48	5.75847e-49	4.05522e-34	1.51913e-38	4.73002e-44	1.50442e-43	4.76116e-38	5.25039e-46	1.32835e-66	1.19265e-91	1.69506e-29	1.18732e-38	2.09314e-47	2.59216e-53	1.04079e-34	6.71697e-39	1.3554e-44	4.89586e-43	1.89564e-53	2.47142e-65	5.51683e-81	2.55079e-106	6.47564e-34	1.84788e-47	1.53858e-60	2.53007e-75	7.39227e-31	3.12461e-32	2.89949e-41	7.55004e-45
		0.89095	0.136956	0.275363	0.193626	0.186982	0.46668	0.299898	0.700158	0.468094	0.997787	0.790838	0.581145	0.158202	0.00069561	0.000169495	8.9324e-06	0.769878	0.0564599	0.0169712	0.0252697	0.435171	0.118662	0.0727883	0.0694071	0.359372	0.0270882	3.02488e-06	9.86439e-13	0.708878	0.204717	0.0286496	0.00519122	0.309067	0.0929348	0.0432864	0.0902746	0.000551336	3.28463e-07	5.0347e-11	4.86931e-20	0.623922	0.00609141	1.49764e-05	5.33814e-10	0.791166	0.648693	0.124634	0.05664
		NA	NA	NA	NA	NA	NA	NA	NA	NA	NA	NA	NA	NA	NA	NA	NA	NA	NA	NA	NA	NA	NA	NA	NA	NA	NA	NA	NA	NA	NA	NA	NA	NA	NA	NA	NA	NA	NA	NA	NA	NA	NA	NA	NA	NA	NA	NA	NA
		0.00132534	1.45698e-06	1.57508e-08	2.78104e-11	1.06795e-14	1.99487e-08	2.04346e-06	4.18451e-05	4.70836e-09	4.90966e-15	4.87002e-22	5.86913e-10	6.37367e-08	1.06259e-18	1.12177e-20	1.35974e-25	2.01727e-21	3.543e-15	7.48237e-13	5.30107e-13	1.43389e-11	2.83227e-19	3.36447e-26	2.74546e-17	3.28552e-19	5.38788e-27	7.76038e-30	1.29874e-35	8.95813e-25	5.73397e-20	1.20164e-20	3.62497e-22	5.39568e-15	4.93782e-24	2.69477e-35	2.787e-23	3.25377e-27	2.16844e-41	1.74003e-53	7.6494e-74	6.24848e-32	2.51858e-29	9.79361e-34	2.86491e-34	4.88504e-15	4.54757e-25	1.08212e-32	3.496e-23
		6.62215e-08	4.93457e-06	2.00868e-07	5.51466e-08	0.122066	7.20843e-06	2.03588e-08	1.25282e-14	0.00020524	0.0166332	0.0909648	9.75458e-07	0.00306405	0.920568	0.433577	0.526973	0.668517	0.0839325	0.0175858	9.05728e-05	0.00807189	0.333782	0.557414	0.0202412	0.538061	0.044844	0.193948	0.0601163	0.222918	0.584619	0.72814	0.334682	0.151217	0.687029	0.163507	0.449648	0.00164191	2.66381e-07	1.37742e-08	2.30168e-16	0.00242044	0.0702006	0.00346672	0.017303	0.128678	0.62348	0.401936	0.291089
		NA	NA	NA	NA	NA	NA	NA	NA	NA	NA	NA	NA	NA	NA	NA	NA	NA	NA	NA	NA	NA	NA	NA	NA	NA	NA	NA	NA	NA	NA	NA	NA	NA	NA	NA	NA	NA	NA	NA	NA	NA	NA	NA	NA	NA	NA	NA	NA
		0.125937	0.13858	2.22952e-05	1.50314e-07	0.013171	0.345944	0.22682	0.233314	0.0409734	0.17201	0.125481	5.86981e-06	0.690029	0.727872	0.529646	0.0946828	0.484245	0.719534	0.257855	0.295867	0.729828	0.0475175	0.0212111	0.897888	0.00301548	0.000125464	0.000796678	0.308778	0.150364	0.00450275	0.0275717	0.713388	0.724375	0.0614507	0.0453541	0.352838	0.0378065	5.96617e-05	0.0022844	0.211387	0.722427	0.535043	0.591159	0.523854	0.675922	0.124688	0.0877586	0.0147778
		8.03273e-09	3.94315e-11	6.47258e-05	0.00942576	9.80999e-07	5.75846e-11	8.14739e-11	2.13438e-09	5.09658e-07	1.20684e-16	4.84545e-18	9.20339e-05	7.72207e-13	1.45493e-15	2.82441e-16	3.07993e-16	8.38069e-12	1.06977e-15	3.79033e-11	6.13191e-15	7.03535e-12	1.69782e-20	2.2363e-22	1.77839e-14	3.58057e-26	2.0235e-32	5.54953e-32	7.44547e-21	1.80839e-21	4.63649e-28	1.49308e-25	3.17234e-18	6.86337e-12	1.06045e-20	6.36139e-22	6.29713e-13	6.74951e-26	6.9401e-37	4.55957e-34	5.22284e-27	1.6312e-17	1.1737e-19	1.43698e-19	1.29527e-21	4.87244e-14	4.49787e-19	3.25976e-20	7.9337e-08
		NA	NA	NA	NA	NA	NA	NA	NA	NA	NA	NA	NA	NA	NA	NA	NA	NA	NA	NA	NA	NA	NA	NA	NA	NA	NA	NA	NA	NA	NA	NA	NA	NA	NA	NA	NA	NA	NA	NA	NA	NA	NA	NA	NA	NA	NA	NA	NA
		1.13475e-138	2.57525e-166	1.67724e-167	3.4516e-183	1.85991e-110	1.87889e-137	8.67102e-163	1.1037e-158	3.04248e-89	5.67067e-85	3.56933e-131	7.67409e-113	1.13418e-68	1.73583e-89	4.79246e-106	1.38329e-111	5.07139e-55	6.76823e-66	7.86513e-76	3.38263e-89	1.37074e-41	1.06521e-49	6.89525e-58	6.96471e-64	0.154373	0.000122806	1.41951e-11	9.8539e-22	0.328695	0.044324	0.000194572	9.91236e-12	4.05021e-05	1.65297e-07	2.59541e-14	9.42958e-13	0.0161788	0.696363	0.000267887	4.40633e-09	0.000903871	0.0277001	0.119509	7.88338e-05	0.021553	0.0965333	0.0123216	0.00104946
		1.28649e-07	7.62829e-12	3.58767e-12	1.96926e-14	9.14231e-05	5.08991e-09	6.76451e-11	1.79455e-12	2.31878e-05	0.00301643	4.07109e-06	0.0146592	0.277199	0.0287656	0.000717228	0.000721349	0.713562	0.257919	0.165665	0.527414	0.654577	0.511515	0.218135	0.698216	5.77502e-44	1.4024e-36	5.9454e-26	1.47243e-14	4.56911e-51	2.86952e-45	3.2187e-33	1.53741e-22	2.49348e-25	4.55248e-23	9.04875e-15	9.24769e-18	1.1454e-63	1.33902e-46	7.92515e-27	3.83489e-23	2.40327e-68	3.5284e-65	1.34884e-46	6.21269e-39	1.05807e-28	1.1309e-34	9.48448e-33	2.4376e-34
		NA	NA	NA	NA	NA	NA	NA	NA	NA	NA	NA	NA	NA	NA	NA	NA	NA	NA	NA	NA	NA	NA	NA	NA	NA	NA	NA	NA	NA	NA	NA	NA	NA	NA	NA	NA	NA	NA	NA	NA	NA	NA	NA	NA	NA	NA	NA	NA
		6.66854e-12	6.40102e-24	7.61863e-27	2.87335e-35	1.15647e-15	2.37122e-19	4.7505e-31	3.32421e-41	1.65396e-14	5.03225e-08	2.64926e-06	5.80436e-08	6.74305e-07	2.30217e-09	1.09716e-09	8.39411e-08	2.22396e-09	9.93838e-05	1.04339e-09	8.89321e-13	6.74471e-22	2.0363e-20	2.78947e-16	6.1639e-20	1.87137e-06	2.40322e-07	3.89688e-07	2.59608e-09	8.57719e-07	0.000400334	5.54939e-07	1.88921e-09	2.08802e-21	9.97866e-24	1.20172e-19	1.08535e-21	1.62239e-39	9.10889e-52	5.89923e-62	2.73411e-60	2.19025e-40	5.27882e-44	3.53396e-53	3.53165e-63	6.81402e-19	2.35966e-16	1.71461e-09	0.00014732
		0.207553	0.0697716	0.279855	0.00601012	0.642242	0.854765	0.778797	0.757598	0.699135	9.90375e-06	1.19557e-12	2.61533e-16	7.12385e-06	0.000223606	6.47372e-06	1.72448e-13	0.0567536	2.14947e-08	2.07756e-07	1.95715e-09	0.0265951	0.625498	0.170182	0.0106921	0.000195097	1.95097e-05	1.73505e-08	7.25656e-14	0.0185107	1.13176e-08	1.04377e-09	3.6837e-14	0.0300038	0.127298	0.938494	0.127511	4.4335e-08	9.18151e-11	1.91091e-13	1.53464e-11	3.59702e-11	7.57615e-09	4.96118e-09	1.38521e-07	0.0233206	0.334303	0.738561	0.00829306
		NA	NA	NA	NA	NA	NA	NA	NA	NA	NA	NA	NA	NA	NA	NA	NA	NA	NA	NA	NA	NA	NA	NA	NA	NA	NA	NA	NA	NA	NA	NA	NA	NA	NA	NA	NA	NA	NA	NA	NA	NA	NA	NA	NA	NA	NA	NA	NA
Aal	inters	21.4188	16.6868	18.326	18.2638	16.4991	17.2571	16.6083	20.729	13.8991	12.0767	12.4844	13.8912	6.34046	5.24139	5.85547	6.37836	6.21654	5.94665	5.81385	7.47487	6.92753	5.66277	6.15142	7.51991	1.49191				1.82945	1.58849	1.69229	1.88825	2.87674	2.36107	2.28735	2.5019					1.56859		1.59668	1.61093	2.78357	2.69129	2.56645	2.73485
	incidence	0.915381	0.92491	0.921349	0.921479	0.926785	0.925098	0.926538	0.918171	0.932015	0.937263	0.936027	0.932036	0.959907	0.966643	0.962735	0.959694	0.962094	0.963653	0.964105	0.955191	0.956019	0.963249	0.960805	0.953929		1.01201	1.01348	1.01297					0.986201				1.01663	1.01754	1.01638	1.01384					0.98584	0.987959		0.987449
	loglik
Gpy	inters	4.69569	5.95598	8.39427	11.3104	4.22441	5.04253	7.50266	8.42589	4.38764	4.83103	6.70498	10.8728	5.77828	7.6993	11.761	16.5138	5.63264	6.82822	11.243	14.1573	5.32305	6.24842	9.51351	15.6106	7.40169	9.98011	15.1165	21.9407	6.92699	8.26716	13.5798	14.6761	6.63664	8.16112	12.1602	21.8073	9.3307	13.446	20.1152	31.7229	8.68471	10.4057	17.505	20.6586	8.15867	9.06671	13.7951	22.1064
	incidence	0.943294	0.943202	0.934997	0.929763	0.951436	0.953918	0.943187	0.948044	0.943424	0.951524	0.947602	0.935704	0.934272	0.931744	0.920047	0.913929	0.937801	0.939974	0.92456	0.92462	0.934813	0.939947	0.932291	0.921636	0.922105	0.919164	0.90903	0.901065	0.92761	0.93058	0.916251	0.924289	0.924573	0.927565	0.921776	0.907123	0.911145	0.905055	0.895683	0.884082	0.916704	0.919617	0.904169	0.907806	0.914957	0.922105	0.915258	0.905666
	loglik
Lti	inters
	incidence
	loglik
Sci	inters
	incidence
	loglik
Pvo	inters	2.89628	2.83317	2.84477	2.87851									2.67438	2.63227	2.62943	2.64117									2.69024	2.65252	2.65484	2.66466									2.72977	2.69712	2.71873	2.7202
	incidence					1.04318	1.04472	1.04537	1.04471									1.04619	1.0472	1.04883	1.04786									1.04326	1.04446	1.04594	1.04516									1.03932	1.0403	1.04221	1.04178
	loglik
Cfi	inters			0.459368	0.555322		0.0115232	0.49763				0.0545135	0.200962			0.406169	0.569063		0.0115232					0.0394123	0.170496			0.39958	0.536587		0.0115232					0.0359948	0.156802			0.383936	0.496284		0.0153801					0.0307992	0.146807
	incidence		0.758071					0.950669	0.927901			1.05399	1.04989		0.781639					0.940183	0.917341			1.06597	1.05485		0.803149					0.917668	0.911674			1.07065	1.05923		0.822882					0.916855	0.913375			1.07851	1.06201
	loglik
Ccr	inters
	incidence
	loglik
Mca	inters		1.41859	2.1329	2.78559		1.49058	2.21537	3.24769		1.371	1.76079	2.49737			2.03616	2.82635		1.54148	2.2714	3.368			1.65867	2.61393		1.54386	2.33446	3.32338		1.68696	2.41275	3.52605		1.54777	2.01076	2.83519		1.40878	2.14087	2.76179		1.44423	2.02746	2.89488			1.73213	2.2905
	incidence	1.04327	1.03965	1.03382	1.03163	1.04597	1.03963	1.03191	1.02562	1.04169	1.04037	1.03997	1.03198	1.04155	1.03609	1.02981	1.02467	1.04215	1.0338	1.02626	1.01875	1.03851	1.03687	1.03676	1.02558	1.04245	1.0306	1.0237	1.01756	1.03578	1.02925	1.02276	1.01568	1.03373	1.02999	1.02841	1.02104	1.03863	1.03375	1.02654	1.02352	1.0421	1.03427	1.02802	1.02168	1.03841	1.03418	1.03281	1.02747
	loglik
Mav	inters
	incidence
	loglik
Dni	inters	5.19985	7.61354	8.64872	11.0461	6.83272	7.0214	10.6861	12.339	8.84157	10.2862	10.3833	10.647	5.81374	9.2571	11.5453	15.3601	7.70412	8.46702	14.4332	19.3664	10.3283	12.9219	14.1848	16.0993	6.09029	9.37456	12.7821	18.7262	8.20844	8.83799	14.3719	21.825	11.0081	14.0104	15.9301	17.4782	6.49155	10.3801	13.3354	19.2416	8.64276	9.38945	15.377	22.9003	10.7969	14.168	15.6666	19.1606
	incidence	0.925031	0.924771	0.934001	0.93693	0.912008	0.922955	0.920149	0.928962	0.90661	0.916059	0.92802	0.942768	0.920194	0.91635	0.921873	0.92329	0.906801	0.915199	0.907297	0.910651	0.8998	0.906039	0.914466	0.925311	0.918179	0.915806	0.917236	0.91446	0.904047	0.913068	0.90748	0.905291	0.897003	0.902482	0.90934	0.92122	0.915409	0.91141	0.915407	0.912649	0.901805	0.910444	0.904566	0.902802	0.897853	0.90199	0.910077	0.917125
	loglik
Sbe	inters
	incidence
	loglik
Hcr	inters			1.82217	2.86401			1.9163	2.64451			1.89485	2.34036		1.64341	2.00881	2.89092		1.55159	2.09425	2.76125		1.59906	1.99425	2.4087		1.68455	2.07451	2.78557		1.66541	2.22651	2.90059		1.76856	2.10256	2.60013		1.99437	2.20465	2.79928		1.93323	2.45601	2.9279		1.81357	2.22515	2.88344
	incidence	1.02817	1.02128	1.01832	1.01167	1.0303	1.02122	1.01631	1.01391	1.03009	1.02032	1.0172	1.01643	1.02422	1.01673	1.01497	1.01083	1.02706	1.01804	1.01349	1.01239	1.02659	1.01736	1.01474	1.01503	1.01967	1.01502	1.0132	1.01122	1.02202	1.01494			1.01899	1.01379	1.0128	1.01241	1.01583				1.01888				1.01637	1.01227
	loglik
Cau	inters	51.0316	48.3171	34.7279	14.7373	16.2809	15.9787	19.6693	20.5538	9.11385	10.7242	6.87006	13.1672	175.754	238.799	327.679	129.487	47.8841	118.152	277.636	422.967	14.889	31.5627	42.6043	79.91	64.7126	60.9724	61.3576	31.5592	26.0638	45.2226	80.9127	105.318	12.0894	22.099	26.7937	14.7867	17.8198	30.8289	36.115	10.0103	3.74807	8.29971	17.5499	33.8959		2.46117	4.99424	11.1056
	incidence	0.958207	0.963309		1.03229							1.03742		0.918026	0.911103	0.90163	0.952435	0.957894	0.930218	0.903143	0.892851		0.975966	0.967342	0.949616	0.938695	0.951233	0.955961		0.972325	0.954845	0.93821	0.934313					0.970363	0.951986	0.951366		1.02463		0.968666	0.949137	1.07373	1.0525	1.02689
	loglik
Clu	inters	9.61568	13.0389	11.3649	12.7566	6.83497	8.99093	13.344	15.7264	5.0781	5.98517	8.50272	10.0802	6.75057	8.22166	7.21809	8.97648	4.86633	6.11067	9.56444	10.56	4.21947	4.96938	7.04972	8.11952	8.26914	9.77359	9.16283	11.6098	4.91902	6.76571	9.86378	10.584	4.27179	5.14636	7.39419	8.24034	11.3928	15.1176	14.6772	20.4764	4.96635	6.38486	9.64866	10.9932	4.29391	5.27677	7.35286	8.70312
	incidence	0.945329	0.929087	0.952104	0.959825	0.964511	0.95663	0.934125	0.930351	0.96158	0.961557	0.953367	0.956894	0.966486	0.957078			0.982586	0.977823	0.952423	0.951921	0.971153	0.970188	0.962695	0.967813	0.946787	0.940055	0.956138	0.947332	0.981769	0.970045	0.947823	0.949292	0.969666	0.967001	0.957602	0.964838	0.918399	0.906727	0.925055	0.917788	0.980322	0.97021	0.945276	0.941467	0.9687	0.965177	0.95553	0.958746
	loglik
Ala	inters	11.8948	14.5256	17.9273	18.1104	8.98456	10.6744	11.2624	12.8886	12.9554	16.0339	16.1506	17.3819	15.8952	20.5318	27.07	29.4427	12.6427	13.766	15.8956	18.3843	19.6827	21.4491	23.4154	24.9482	22.5656	41.5934	55.2259	53.9795	23.4807	30.9621	36.9214	37.3436	31.1127	40.5051	40.4168	41.2747	33.7888	84.2925	109.462	110.463	36.6711	40.2646	50.2894	50.9517	29.8325	34.8985	41.022	42.002
	incidence	1.02417	1.01827	1.01079	1.01009	1.01215				0.974707	0.957014	0.959209	0.9614	1.01519	1.00761							0.958219	0.954729	0.959521	0.959854			0.986899				0.990782	0.989698	0.962855	0.950621	0.950915	0.958156		0.968633	0.961354	0.960702	0.980988	0.97454	0.967963	0.966733	0.957801	0.955368	0.949466	0.956291
	loglik
Uar	inters		0.264237		1.62959				2.0357						0.275582		1.71926				2.13713						0.279896		1.70862				2.01464								1.73657				1.97287
	incidence			0.867757	0.887158			0.820967	0.812225			0.762848	0.777291		0.85137	0.867695	0.880518			0.805183	0.80632			0.773129	0.776844		0.849504	0.871808	0.881289			0.789562	0.813486			0.785482	0.794006		0.828817	0.873421	0.879274			0.785465	0.816025			0.793552	0.797862
	loglik
Mlu	inters	2.27686	1.88253	1.74471	2.86589	2.27224	2.516	3.33531	4.91431	2.46564	2.48894	2.39542	2.07871	2.18399	1.95208	2.04004		2.07336		1.5849	2.43577	2.04264	1.90039	1.48446		3.08511	1.56752		2.09817				1.71846	1.97374	1.88718	1.55258	1.54865	4.96252	5.05755	5.44045	8.94008	4.41085	5.36949	6.77226	10.3543	2.60226	2.40798	1.98722	2.05362
	incidence	1.03225	1.04471	1.05113	1.038	1.04168	1.044	1.03856	1.02636	1.02129	1.02732	1.03265	1.04421	1.02967	1.0388	1.0419	1.0706	1.04369	1.07274	1.07086	1.0562	1.02546	1.03392	1.04901	1.06095	1.01684	1.05071	1.06129	1.0569	1.06449	1.08132	1.08548	1.07877	1.02567	1.03431	1.05018	1.05406				0.983193						1.02258	1.03814	1.03998
	loglik
Mpu	inters
	incidence
	loglik
Mma	inters
	incidence
	loglik
Ggu	inters	13.4578	13.7381	13.5143	14.473	13.3588	13.7083	12.8825	12.5963	10.4178	13.3895	13.7189	14.0324	12.2711	14.1317	15.3114	15.8779	12.8246	13.4352	12.9793	12.5466	11.7247	12.2474	13.2567	14.058	20.8591	23.8654	25.7351	25.0731	17.0318	20.3571	20.5204	19.4637	16.0935	15.0817	15.9646	20.4414	25.8214	37.2937	43.7615	57.6565	20.5068	24.4411	25.621	24.5737	17.5767	16.4613	18.2798	21.3863
	incidence	0.935758	0.929938	0.93139	0.918388	0.915228	0.916486	0.953367	0.954495	0.921859	0.893703	0.880072	0.888483			0.954932	0.941633				1.0476	0.950941											1.057	0.948031					0.937741	0.924999	0.883384			1.07755	1.09346	0.92838
	loglik
Llu	inters	6.76074	4.36246	3.91411	4.90277	5.61548	4.8451	3.93407	5.14551	5.65085	4.83816	4.00054	5.27019	6.62222	4.4199	4.30032	5.9873	5.65683	4.60447	4.26477	6.50646	5.6697	4.49861	4.22881	6.30381	6.80621	4.60318	4.52858	6.78005	5.62885	4.78793	4.36049	7.01555	5.78954	4.60749	4.44103	6.96342	6.85281	4.85704	4.56437	6.79811	5.58913	5.10677	4.42059	6.89547	5.78548	4.8749	4.51976	6.7041
	incidence	0.911855	0.940829	0.953505	0.953967	0.912964	0.933209	0.9504	0.949933	0.913799	0.934231	0.950285	0.949077	0.91282	0.940573	0.949772	0.945148	0.912618	0.935952	0.947312	0.939842	0.913642	0.93763	0.948026	0.941246	0.911543	0.938667	0.946989	0.938874	0.912852	0.934128	0.945918	0.935583	0.912656	0.936513	0.945727	0.936157	0.911225	0.93615	0.945937	0.938064	0.913186	0.931118	0.945275	0.936401	0.912689	0.933878	0.944552	0.937614
	loglik
Fsi	inters	10.5699	9.0994	6.24538	3.95568	6.12111	6.65677	7.59798	7.20897	6.63156	6.74082	6.72982	6.12837	9.72912	8.09597	5.73399	3.94809	5.74492	5.99661	7.3145	7.22138	6.47665	6.5469	7.1881	7.33188	11.8926	11.4701	9.28387	7.26533	7.22943	8.7075	10.6418	11.8357	6.18351	5.8863	5.94366	5.67481	15.7274	15.2336	13.5843	14.892	11.5917	13.9158	16.8238	22.0997	6.70096	6.66049	7.34625	6.87164
	incidence	0.930734	0.952933	0.983451		0.951936	0.957535	0.961228	0.976133	0.953602	0.962395	0.97172	0.983993	0.932344	0.954563			0.953146	0.959825	0.959911	0.973386	0.951846	0.959597	0.965124	0.971011	0.916842	0.932641	0.955159	0.979609	0.941478	0.941997	0.938723	0.944428	0.948572	0.95904	0.96784	0.977233	0.904208	0.920641	0.943303	0.955212	0.924031	0.924526	0.922936	0.922439	0.947748	0.95783	0.962381	0.973218
	loglik
Lly	inters
	incidence
	loglik
Lpa	inters	35.5557	49.7138	37.423	36.0159	26.0169	33.0677	38.5536	35.5338	33.3092	37.8948	43.6116	31.8161	155.285	181.167	173.443	121.281	96.4187	75.5316	102.82	127.578	46.7964	163.571	328.012	403.187	248.364	580.798	1047.51	1348.59	227.86	237.715	385.621	98.5507	98.5507	393.275	498.368	1288.65	47.2457	62.0037	56.9456	53.9379	44.2955	49.1259	43.1472	40.0175	34.8146	40.6893	42.1904	38.1038
	incidence	0.967804	0.956118	0.969465	0.973716	0.978826	0.971638	0.970959	0.978294	0.965271	0.96453	0.961	0.975398	0.91903	0.916677	0.920121	0.940008	0.938426	0.956053	0.952325	0.953711	0.956796	0.91984	0.895655	0.890017	0.91657	0.896267	0.880981	0.870994	0.915669	0.916645	0.913074	0.749802	0.938686	0.902838	0.90433	0.875849	0.980327	0.971802	0.977952	0.980205	0.966955	0.964064	0.976721	0.981389	0.970936	0.970328	0.971664	0.979097
	loglik
Hic	inters	1.51782	1.46754			1.8988	1.78829		1.40037	1.9801	1.61685			1.41368	1.42763			1.52112				1.63425	1.66565	1.41833		1.97511	2.77787	2.80968	4.73343	2.01601	2.0082	2.8357	3.90916	1.90824	2.4016	3.21487	4.74893	1.92407	2.07934	2.29344	3.05572	1.81855	1.75378	2.25903	2.32532	2.00627	2.2821	3.13594	3.00467
	incidence	1.0488	1.05373	1.06981	1.0724	1.03903	1.04422	1.05763	1.05835	1.03884	1.04828	1.05498	1.07119	1.05334	1.05684	1.06463	1.06897	1.05095	1.0568	1.06128	1.06565	1.04874	1.05032	1.05729	1.06271	1.0436	1.03807	1.04035	1.03157	1.04284	1.04607	1.03923	1.03683	1.04346	1.04003	1.0362	1.03178	1.04405	1.04503	1.04538	1.04058	1.04516	1.04903	1.04377	1.04768	1.0407	1.03924	1.03355	1.03812
	loglik
Gge	inters	10.1444	14.5691	14.381	16.97	7.59572	12.0455	13.6418	13.1814	7.52599	9.62006	10.3108	10.6414	13.3116	20.3916	23.213	29.9353	9.09729	14.7833	17.1867	18.4261	9.59525	12.4671	14.6286	17.194	10.308	13.2322	23.4223	45.0544	8.06134	11.2444	14.2721	17.3797	9.35347	11.7675	13.6612	14.3789	15.9329	22.1463	31.2539	66.2642	8.77886	13.8364	19.9252	31.8685	7.35439	8.1916	11.0788	13.3107
	incidence														0.980157	0.978161	0.973853			0.98613	0.986673						0.987406	0.972885	0.956673			0.987598	0.983723			0.98856		0.980056	0.9699	0.960697	0.939705		0.984157	0.974829	0.961815
	loglik
Rru	inters	2.12076	3.25891	3.81934	4.6696	5.18574	3.79935	3.22246	2.54207	3.3084	5.13748	7.54838	4.25796	3.67806	10.4742	10.8131	14.2343	8.31537	7.13086	6.61773	5.71942	4.07776	6.91747	9.61805	7.97148	8.77153	16.877	17.2591	23.6089	9.56609	9.14941	10.9056	10.9909	5.23818	9.40868	15.3823	11.5712	15.6623	39.5942	58.1741	138.896	14.3476	15.8604	26.1219	24.4645	5.04693	9.23965	12.3948	10.0818
	incidence	1.05675	1.04958	1.05424	1.05501		1.04675	1.06028	1.07639	1.03276	1.02136		1.04939	1.03219						1.02755	1.04159	1.02393			1.02453		0.975972											0.962526	0.934401	0.929732	0.89597	0.969188		0.964414	0.971597
	loglik
Cib	inters			3.63332	5.87259	2.09244				1.86935			3.74321										0.517865	0.463956		0.380799	0.291218	0.335535			0.42143	0.506537				0.516285		0.529759	0.284855	0.391603									2.28751
	incidence	1.08779	1.0969	1.05959	1.04248	1.07359	1.1031	1.10221	1.11137	1.07712	1.14243	1.14717	1.05576	1.11282	1.12227	1.14767	1.18306	1.10715	1.1286	1.10668	1.16148	1.11224	1.16016	1.16834	1.13146	1.18182	1.20136	1.20135	1.16538	1.14737	1.17677	1.16915	1.14797	1.1106	1.15841	1.16676	1.12224	1.17034	1.21205	1.19793	1.18191	1.13077	1.14106	1.14244	1.15809	1.12176	1.14959	1.15884	1.09235
	loglik
Cpy	inters	49.1413	68.6313	69.8986	94.109	35.6511	52.6729	65.0185	74.5829	29.963	29.626	49.4283	38.7158	19.2757	27.3447	34.2026	35.2757	15.1984	19.5177	21.582	21.0919	10.3138	12.1517	14.1925	16.7788		2.14417	3.76176	6.89604		1.4595	2.0797	3.76701	2.08484	2.57186	4.17277	3.90734	0.597398		2.28285	3.44367	0.511526	0.641567		2.14461	1.52643		1.60039	1.81561
	incidence	0.967412	0.958103	0.957358	0.951476	0.975249	0.963028	0.9603	0.954244	0.971394	0.979554	0.97087	0.984138		0.986821	0.979904	0.980167									1.09028	1.07964	1.06504	1.04847	1.09162	1.08693	1.07668	1.06104	1.06508	1.06143	1.04911	1.05514	1.11506	1.09852	1.07591	1.06535	1.11588	1.1113	1.09098	1.08024	1.07174	1.07852	1.07606	1.07534
	loglik
Oam	inters	4.11499	7.67799	7.11348	11.9671	5.59105	5.29456	7.37349	9.04965	4.70009	2.73976	2.27659	2.55277	2.78727	3.46677	3.49671	2.7814	3.96952	2.25235	3.5641	4.02959	11.4985	9.35657	6.87999	6.90389	2.66155	2.80362	2.70185	2.99316	3.054	2.06112	2.71669	2.99059	11.4217	12.1244	9.0891	8.04545	27.5802	46.5342	76.9573	76.6241	38.9131	34.6816	46.7938	45.0356	11.0777	10.4298	7.23294	3.78946
	incidence				0.97951						1.03059	1.04546	1.04965	1.03861	1.0322	1.0391	1.05958		1.04959	1.04561	1.04921	0.974779			1.02472	1.03286	1.03676	1.04806	1.05989	1.02365	1.0512	1.05316	1.0594	0.974601				0.934408	0.921069	0.906678	0.913372	0.910436	0.927296	0.927461	0.940767	0.971089			1.04699
	loglik
#	INTERS	17	19	20	21	17	18	18	19	17	17	18	19	17	19	19	19	16	17	17	18	16	18	20	17	17	20	19	20	14	19	18	19	16	18	20	19	17	18	20	20	16	18	17	19	15	16	19	20
#	INCID	17	18	17	18	16	16	18	18	16	17	19	19	16	19	16	16	14	15	19	20	16	14	16	18	14	19	18	16	15	15	18	19	16	13	16	15	16	19	18	18	16	14	19	19	16	15	15	16
MED	INTERS	14.2596	15.0029	13.4168	13.94	10.0621	11.2701	13.2923	13.934	9.53515	10.3177	11.3793	10.5429	26.2097	29.8512	35.3034	23.4804	15.3604	17.9781	30.4039	39.2628	10.7	17.5697	25.3992	37.4782	25.1956	39.9143	68.3396	81.0965	25.134	21.2063	34.2468	19.8788	14.1621	30.8117	34.0719	77.769	14.3759	21.9583	24.8401	31.6468	13.4403	13.4928	18.1374	18.8729	10.0238	10.7258	10.4817	11.0271
MED	INCID	0.983647	0.972521	0.982535	0.983655	0.985927	0.990258	0.980231	0.979747	0.980379	0.987559	0.981571	0.981878	0.988167	0.968697	0.980934	0.989274	0.990611	0.999031	0.981217	0.985662	0.983968	0.987558	0.979448	0.980951	0.992731	0.977581	0.989976	0.98714	1.00179	1.00615	0.982527	0.97597	0.985023	0.991078	0.984105	0.979365	0.986788	0.962847	0.970763	0.964933	0.992522	0.991567	0.97524	0.976562	0.98867	0.998901	0.989818	0.987208
		BASELINE	2020	2050	2080
MEDIAN
#	INTERS	18	17.5	19	18
#	INCID	17.5	16	16	16
1ST QUARTILE
#	INTERS	17	17	17.75	16.75
#	INCID	16.75	15.75	15	15.75
3RD QUARTILE
#	INTERS	19	19	19.25	19.25
#	INCID	18	18.25	18	18.25
INTERQUARTILE RANGE X 1.5
#	INTERS	3	3	2.25	3.75
#	INCID	1.875	3.75	4.5	3.75
		BASELINE	2020	2050	2080
AVERAGE
MED	INTERS	12.2461	25.7497	39.3189	16.5852
MED	INCID	0.982492	0.984627	0.987786	0.982152
SD
MED	INTERS	1.91359	9.1311	23.2212	6.75125
MED	INCID	0.00445409	0.00742773	0.0092303	0.0116888

## Sheet: 1.URBAN
		Baseline												2020												2050												2080
		RCP 8.5				RACP 6.0				RCP 4.5				RCP 8.5				RACP 6.0				RCP 4.5				RCP 8.5				RACP 6.0				RCP 4.5				RCP 8.5				RACP 6.0				RCP 4.5
Aal	inters	2.36773	2.28404	2.30339	2.2543	2.36638	2.35794	2.35513	2.32164	2.32072	2.27361	2.25153	2.21206	2.24584	2.23618	2.24196	2.22176	2.3113	2.27394	2.26422	2.25947	2.17253	2.10906	2.16855	2.18645	2.22524	2.23982	2.20709	2.21114	2.28469	2.24226	2.26196	2.25442	2.11228	2.09719	2.10522	2.1228	2.32662	2.36604	2.33974	2.34879	2.37145	2.40149	2.40337	2.37415	2.12239	2.18973	2.20551	2.18721
	incidence	0.921993	0.943155	0.938475	0.9501	0.939678	0.941638	0.942284	0.949812	0.938043	0.949191	0.954159	0.962627	0.944253	0.946585	0.945192	0.950003	0.94829	0.956454	0.954964	0.955992	0.953718	0.967933	0.961766	0.961303	0.952968	0.949621	0.957033	0.956135	0.950442	0.959662	0.958978	0.957079	0.960522	0.967257	0.968745	0.968227	0.923711	0.917527	0.920083	0.917572	0.915527	0.917039	0.916525	0.924378	0.933908	0.932664	0.933241	0.933775
	loglik	-723.765	-742.641	-763.412	-790.61	-731.376	-762.354	-780.818	-807.513	-725.119	-764.207	-801.844	-828.309	-656.818	-653.789	-661.216	-673.862	-661.532	-682.005	-691.685	-706.259	-682.894	-718.203	-728.766	-734.122	-678.083	-698.104	-730.427	-764.12	-673.009	-710.863	-742.536	-779.993	-661.939	-701.827	-749.361	-788.473	-667.882	-697.687	-716.987	-732.381	-653.574	-693.863	-713.741	-756.018	-606.936	-640.064	-669.524	-717.43
Gpy	inters	1.56834	1.91633	2.30504	2.68627	1.69911	2.04465	2.50557	2.9947	1.45233	1.82224	2.32643	2.89672	1.61061	1.98117	2.35272	2.80188	1.74771	2.15666	2.53078	3.12429	1.52271	1.94321	2.52601	3.13947	1.61773	1.99325	2.47969	2.94028	1.76034	2.16513	2.62255	3.35699	1.55585	2.01403	2.64472	3.38916	1.6107	2.00162	2.46471	2.96984	1.73102	2.14378	2.58192	3.29204	1.55591	1.98473	2.61728	3.3419
	incidence	0.807088	0.861701	0.812425	0.850297	0.788674	0.851081	0.763349	0.83748	0.80653	0.881892	0.867162	0.859764	0.772491	0.804181	0.789064	0.823089	0.706202	0.733137	0.728887	0.745639	0.71659	0.763163	0.729331	0.793318	0.744977	0.775495	0.734959	0.768361	0.66811	0.704423	0.695385	0.691417	0.663115	0.673938	0.669877	0.670319	0.755205	0.75106	0.749153	0.746082	0.694449	0.713218	0.717776	0.702346	0.663015	0.692745	0.676836	0.684059
	loglik	-376.037	-377.319	-397.177	-387.929	-376.292	-376.947	-388.828	-367.488	-386.385	-395.394	-406.116	-387.521	-380.95	-382.88	-408.34	-401.214	-374.062	-376.65	-400.194	-379.465	-388.348	-392.852	-410.051	-393.119	-391.144	-392.972	-422.203	-419.029	-381.037	-384.093	-416.26	-393.01	-392.127	-397.561	-420.944	-403.997	-401.646	-400.574	-440.703	-437.138	-399.323	-396.478	-442.692	-420.059	-399.167	-406.229	-432.892	-416.843
Lti	inters	1.66371e-09	1.66371e-09	1.66371e-09	1.66371e-09	3.18924e-10	3.18924e-10	3.18924e-10	3.18924e-10	4.18005e-11	4.18005e-11	4.18005e-11	4.18005e-11	1.66371e-09	1.66371e-09	1.66371e-09	1.66371e-09	3.18924e-10	3.18924e-10	3.18924e-10	3.18924e-10	4.18005e-11	4.18005e-11	4.18005e-11	4.18005e-11	1.66371e-09	1.66371e-09	1.66371e-09	1.66371e-09	3.18924e-10	3.18924e-10	3.18924e-10	3.18924e-10	4.18005e-11	4.18005e-11	4.18005e-11	4.18005e-11	1.66371e-09	1.66371e-09	1.66371e-09	1.66371e-09	3.18924e-10	3.18924e-10	3.18924e-10	3.18924e-10	4.18005e-11	4.18005e-11	4.18005e-11	4.18005e-11
	incidence	1	1	1	1	1	1	1	1	1	1	1	1	1	1	1	1	1	1	1	1	1	1	1	1	1	1	1	1	1	1	1	1	1	1	1	1	1	1	1	1	1	1	1	1	1	1	1	1
	loglik	-3.65596e-06	-3.65596e-06	-3.65596e-06	-3.65596e-06	-2.05335e-07	-2.05335e-07	-2.05335e-07	-2.05335e-07	0.000422934	0.000422934	0.000422934	0.000422934	-3.65596e-06	-3.65596e-06	-3.65596e-06	-3.65596e-06	-2.05335e-07	-2.05335e-07	-2.05335e-07	-2.05335e-07	0.000422934	0.000422934	0.000422934	0.000422934	-3.65596e-06	-3.65596e-06	-3.65596e-06	-3.65596e-06	-2.05335e-07	-2.05335e-07	-2.05335e-07	-2.05335e-07	0.000422934	0.000422934	0.000422934	0.000422934	-3.65596e-06	-3.65596e-06	-3.65596e-06	-3.65596e-06	-2.05335e-07	-2.05335e-07	-2.05335e-07	-2.05335e-07	0.000422934	0.000422934	0.000422934	0.000422934
Sci	inters	2.14566e-09	2.14566e-09	2.14566e-09	2.14566e-09	1.12128e-11	1.12128e-11	1.12128e-11	1.12128e-11	1.01354e-09	1.01354e-09	1.01354e-09	1.01354e-09	2.14566e-09	2.14566e-09	2.14566e-09	2.14566e-09	1.12128e-11	1.12128e-11	1.12128e-11	1.12128e-11	1.01354e-09	1.01354e-09	1.01354e-09	1.01354e-09	2.14566e-09	2.14566e-09	2.14566e-09	2.14566e-09	1.12128e-11	1.12128e-11	1.12128e-11	1.12128e-11	1.01354e-09	1.01354e-09	1.01354e-09	1.01354e-09	2.14566e-09	2.14566e-09	2.14566e-09	2.14566e-09	1.12128e-11	1.12128e-11	1.12128e-11	1.12128e-11	1.01354e-09	1.01354e-09	1.01354e-09	1.01354e-09
	incidence	1	1	1	1	1	1	1	1	1	1	1	1	1	1	1	1	1	1	1	1	1	1	1	1	1	1	1	1	1	1	1	1	1	1	1	1	1	1	1	1	1	1	1	1	1	1	1	1
	loglik	-2.03907e-06	-2.03907e-06	-2.03907e-06	-2.03907e-06	0.000405967	0.000405967	0.000405967	0.000405967	-1.21786e-06	-1.21786e-06	-1.21786e-06	-1.21786e-06	-2.03907e-06	-2.03907e-06	-2.03907e-06	-2.03907e-06	0.000405967	0.000405967	0.000405967	0.000405967	-1.21786e-06	-1.21786e-06	-1.21786e-06	-1.21786e-06	-2.03907e-06	-2.03907e-06	-2.03907e-06	-2.03907e-06	0.000405967	0.000405967	0.000405967	0.000405967	-1.21786e-06	-1.21786e-06	-1.21786e-06	-1.21786e-06	-2.03907e-06	-2.03907e-06	-2.03907e-06	-2.03907e-06	0.000405967	0.000405967	0.000405967	0.000405967	-1.21786e-06	-1.21786e-06	-1.21786e-06	-1.21786e-06
Pvo	inters	3.0125	2.98195	2.94216	2.9725	1.18568	1.1997	1.21879	1.2328	1.27582e-11	1.27582e-11	1.27582e-11	1.27582e-11	2.94011	2.9103	2.87098	2.90059	1.19212	1.20613	1.21836	1.23935	1.27582e-11	1.27582e-11	1.27582e-11	1.27582e-11	2.83981	2.81113	2.76344	2.80151	1.21269	1.21269	1.22493	1.2459	1.27582e-11	1.27582e-11	1.27582e-11	1.27582e-11	2.87768	2.86788	2.83843	2.87833	1.23302	1.23302	1.24532	1.2594	1.27582e-11	1.27582e-11	1.27582e-11	1.27582e-11
	incidence	1.01909	1.01949	1.02008	1.01946	1.08218	1.08149	1.08056	1.07988	0.999999	0.999999	0.999999	0.999999	1.02874	1.02915	1.02994	1.02935	1.08227	1.08159	1.08089	1.07988	0.999999	0.999999	0.999999	0.999999	1.0376	1.03801	1.03897	1.03821	1.08157	1.08157	1.08088	1.07987	0.999999	0.999999	0.999999	0.999999	1.04287	1.04306	1.04363	1.04278	1.081	1.081	1.08031	1.07954	0.999999	0.999999	0.999999	0.999999
	loglik	-273.732	-273.757	-275.054	-270.609	-299.24	-301.527	-301.175	-304.575	0.00123531	0.00123531	0.00123531	0.00123531	-265.417	-265.37	-267.186	-263.733	-287.094	-289.37	-290.382	-294.551	0.00123531	0.00123531	0.00123531	0.00123531	-262.301	-263.37	-264.966	-262.967	-283.326	-284.425	-284.75	-288.21	0.00123531	0.00123531	0.00123531	0.00123531	-264.08	-263.121	-262.682	-261.149	-296.16	-297.364	-297.125	-298.496	0.00123531	0.00123531	0.00123531	0.00123531
Cfi	inters	5.83251e-09	0.053779	0.21659	0.48726	2.75508e-09	0.00592628	0.219006	0.449634	5.80807e-11	5.80807e-11	0.157393	0.504034	5.83251e-09	0.0478534	0.215845	0.48903	2.75508e-09	0.00592628	0.232506	0.460346	5.80807e-11	5.80807e-11	0.130645	0.449105	5.83251e-09	0.0422173	0.236087	0.490154	2.75508e-09	0.00592628	0.247357	0.474434	5.80807e-11	5.80807e-11	0.126993	0.441326	5.83251e-09	0.0360925	0.25771	0.534842	2.75508e-09	0.00592628	0.257147	0.494111	5.80807e-11	5.80807e-11	0.12725	0.428274
	incidence	1	0.193443	0.655895	0.899556	1	0.206633	1.08167	1.01173	1	1	0.173372	0.65326	1	0.185874	0.52679	0.87537	1	0.206633	1.03121	0.988473	1	1	0.863297	0.908776	1	0.184984	0.313349	0.822275	1	0.206633	0.993679	0.971943	1	1	0.996199	0.944632	1	0.199883	0.0829077	0.187468	1	0.206633	1.02879	0.999653	1	1	1.04354	0.97684
	loglik	7.99415e-07	-44.8185	-136.042	-238.865	1.10669e-06	-6.49054	-154.267	-231.239	0.000163697	0.000163697	-96.3472	-236.799	7.99415e-07	-38.8439	-131.489	-237.588	1.10669e-06	-6.49054	-153.206	-228.265	0.000163697	0.000163697	-100.903	-235.815	7.99415e-07	-34.8442	-134.686	-236.551	1.10669e-06	-6.49054	-159.602	-233.195	0.000163697	0.000163697	-105.097	-236.125	7.99415e-07	-32.2998	-136.674	-228.083	1.10669e-06	-6.49054	-171.528	-250.245	0.000163697	0.000163697	-111.437	-236.741
Ccr	inters	1.66404e-11	1.66404e-11	1.66404e-11	1.66404e-11	7.03535e-09	7.03535e-09	7.03535e-09	7.03535e-09	3.51589e-11	3.51589e-11	3.51589e-11	3.51589e-11	1.66404e-11	1.66404e-11	1.66404e-11	1.66404e-11	7.03535e-09	7.03535e-09	7.03535e-09	7.03535e-09	3.51589e-11	3.51589e-11	3.51589e-11	3.51589e-11	1.66404e-11	1.66404e-11	1.66404e-11	1.66404e-11	7.03535e-09	7.03535e-09	7.03535e-09	7.03535e-09	3.51589e-11	3.51589e-11	3.51589e-11	3.51589e-11	1.66404e-11	1.66404e-11	1.66404e-11	1.66404e-11	7.03535e-09	7.03535e-09	7.03535e-09	7.03535e-09	3.51589e-11	3.51589e-11	3.51589e-11	3.51589e-11
	incidence	1	1	1	1	1	1	1	1	1	1	1	1	1	1	1	1	1	1	1	1	1	1	1	1	1	1	1	1	1	1	1	1	1	1	1	1	1	1	1	1	1	1	1	1	1	1	1	1
	loglik	0.000643717	0.000643717	0.000643717	0.000643717	-4.78131e-06	-4.78131e-06	-4.78131e-06	-4.78131e-06	0.000452732	0.000452732	0.000452732	0.000452732	0.000643717	0.000643717	0.000643717	0.000643717	-4.78131e-06	-4.78131e-06	-4.78131e-06	-4.78131e-06	0.000452732	0.000452732	0.000452732	0.000452732	0.000643717	0.000643717	0.000643717	0.000643717	-4.78131e-06	-4.78131e-06	-4.78131e-06	-4.78131e-06	0.000452732	0.000452732	0.000452732	0.000452732	0.000643717	0.000643717	0.000643717	0.000643717	-4.78131e-06	-4.78131e-06	-4.78131e-06	-4.78131e-06	0.000452732	0.000452732	0.000452732	0.000452732
Mca	inters	3.3748	4.24421	5.66052	6.64353	3.36619	4.43269	5.52945	6.75276	3.29515	4.0781	5.11349	5.86795	2.97462	3.72923	4.78459	5.56973	3.05177	3.96786	4.80139	5.71553	2.9948	3.59647	4.40074	5.15994	2.95734	3.68914	4.67049	5.50242	2.97766	3.85569	4.62333	5.5126	2.96766	3.51197	4.33152	4.92062	2.90451	3.6322	4.64756	5.3184	2.84482	3.72638	4.46118	5.32717	2.81885	3.38696	4.1267	4.69958
	incidence	0.934862	0.93866	0.922667	0.971222	0.936784	0.949137	0.93183	0.953841	0.951284	0.961774	0.969506	0.986612	0.937418	0.936334	0.933379	0.977471	0.933592	0.942133	0.948878	0.974989	0.94665	0.968566	0.982003	0.991623	0.94421	0.932272	0.942813	0.966196	0.938265	0.947359	0.960687	0.978554	0.949932	0.969146	0.979991	1.00993	0.949097	0.941094	0.936793	0.981268	0.955259	0.957099	0.956799	0.979528	0.972087	0.981725	0.992599	1.01593
	loglik	-487.692	-481.737	-457.583	-441.866	-493.696	-481.934	-457.979	-447.223	-487.818	-476.588	-471.085	-486.55	-502.527	-505.189	-498.848	-493.713	-503.795	-501.986	-487.862	-492.611	-498.682	-493.601	-498	-512.736	-471.053	-463.647	-447.203	-432.334	-476.221	-470.162	-447.791	-444.173	-470.733	-460.871	-455.6	-471.044	-449.783	-433.359	-399.02	-381.272	-456.795	-438.133	-409.61	-390.441	-450.617	-437.668	-424.798	-432.407
Mav	inters	1.24406e-10	1.24406e-10	1.24406e-10	1.24406e-10	7.4576e-11	7.4576e-11	7.4576e-11	7.4576e-11	7.03535e-09	7.03535e-09	7.03535e-09	7.03535e-09	1.24406e-10	1.24406e-10	1.24406e-10	1.24406e-10	7.4576e-11	7.4576e-11	7.4576e-11	7.4576e-11	7.03535e-09	7.03535e-09	7.03535e-09	7.03535e-09	1.24406e-10	1.24406e-10	1.24406e-10	1.24406e-10	7.4576e-11	7.4576e-11	7.4576e-11	7.4576e-11	7.03535e-09	7.03535e-09	7.03535e-09	7.03535e-09	1.24406e-10	1.24406e-10	1.24406e-10	1.24406e-10	7.4576e-11	7.4576e-11	7.4576e-11	7.4576e-11	7.03535e-09	7.03535e-09	7.03535e-09	7.03535e-09
	incidence	1	1	1	1	1	1	1	1	1	1	1	1	1	1	1	1	1	1	1	1	1	1	1	1	1	1	1	1	1	1	1	1	1	1	1	1	1	1	1	1	1	1	1	1	1	1	1	1
	loglik	0.000100558	0.000100558	0.000100558	0.000100558	0.000153853	0.000153853	0.000153853	0.000153853	-4.35533e-06	-4.35533e-06	-4.35533e-06	-4.35533e-06	0.000100558	0.000100558	0.000100558	0.000100558	0.000153853	0.000153853	0.000153853	0.000153853	-4.35533e-06	-4.35533e-06	-4.35533e-06	-4.35533e-06	0.000100558	0.000100558	0.000100558	0.000100558	0.000153853	0.000153853	0.000153853	0.000153853	-4.35533e-06	-4.35533e-06	-4.35533e-06	-4.35533e-06	0.000100558	0.000100558	0.000100558	0.000100558	0.000153853	0.000153853	0.000153853	0.000153853	-4.35533e-06	-4.35533e-06	-4.35533e-06	-4.35533e-06
Dni	inters	1.38449	1.74766	2.3728	3.31796	1.36694	1.71033	2.13963	3.02411	1.50241	1.98978	2.53224	3.46712	1.41436	1.87775	2.57669	3.71191	1.4022	1.77354	2.40525	3.43356	1.55242	2.11804	2.71785	3.7416	1.44733	1.98369	2.71967	3.90917	1.45285	1.83791	2.51982	3.5995	1.60667	2.21139	2.8069	3.78885	1.48427	2.07199	2.86128	3.92154	1.4872	1.87971	2.61702	3.6659	1.62544	2.2402	2.83124	3.8261
	incidence	0.992436	1.029	1.02894	1.01038	0.988311	0.992373	1.02515	1.01454	0.993555	1.01056	1.00491	0.995724	0.984449	1.00149	1.00014	0.97412	0.978833	0.982371	0.984444	0.980698	0.981467	0.986764	0.981057	0.976574	0.975187	0.978821	0.977615	0.952455	0.964631	0.96829	0.965469	0.961763	0.967554	0.96939	0.968143	0.968089	0.96447	0.959723	0.955113	0.942608	0.954769	0.958885	0.949262	0.950065	0.962637	0.964016	0.964609	0.964158
	loglik	-315.416	-344.467	-358.314	-356.362	-308.826	-335.597	-355.069	-355.887	-322.863	-343.786	-361.899	-360.905	-313.91	-342.843	-358.196	-356.542	-309.263	-333.043	-355.343	-348.184	-324.891	-345.893	-361.852	-359.227	-313.909	-340.334	-355.372	-354.464	-306.808	-331.285	-352.498	-347.1	-321.182	-341.735	-357.005	-355.536	-309.858	-335.327	-348.004	-349.675	-303.993	-326.591	-344.465	-339.42	-315.903	-333.486	-350.093	-351.03
Sbe	inters	1.0476e-10	1.0476e-10	1.0476e-10	1.0476e-10	2.37433e-11	2.37433e-11	2.37433e-11	2.37433e-11	2.28404e-09	2.28404e-09	2.28404e-09	2.28404e-09	1.0476e-10	1.0476e-10	1.0476e-10	1.0476e-10	2.37433e-11	2.37433e-11	2.37433e-11	2.37433e-11	2.28404e-09	2.28404e-09	2.28404e-09	2.28404e-09	1.0476e-10	1.0476e-10	1.0476e-10	1.0476e-10	2.37433e-11	2.37433e-11	2.37433e-11	2.37433e-11	2.28404e-09	2.28404e-09	2.28404e-09	2.28404e-09	1.0476e-10	1.0476e-10	1.0476e-10	1.0476e-10	2.37433e-11	2.37433e-11	2.37433e-11	2.37433e-11	2.28404e-09	2.28404e-09	2.28404e-09	2.28404e-09
	incidence	1	1	1	1	1	1	1	1	1	1	1	1	1	1	1	1	1	1	1	1	1	1	1	1	1	1	1	1	1	1	1	1	1	1	1	1	1	1	1	1	1	1	1	1	1	1	1	1
	loglik	-0.000109834	-0.000109834	-0.000109834	-0.000109834	5.44864e-05	5.44864e-05	5.44864e-05	5.44864e-05	4.15265e-06	4.15265e-06	4.15265e-06	4.15265e-06	-0.000109834	-0.000109834	-0.000109834	-0.000109834	5.44864e-05	5.44864e-05	5.44864e-05	5.44864e-05	4.15265e-06	4.15265e-06	4.15265e-06	4.15265e-06	-0.000109834	-0.000109834	-0.000109834	-0.000109834	5.44864e-05	5.44864e-05	5.44864e-05	5.44864e-05	4.15265e-06	4.15265e-06	4.15265e-06	4.15265e-06	-0.000109834	-0.000109834	-0.000109834	-0.000109834	5.44864e-05	5.44864e-05	5.44864e-05	5.44864e-05	4.15265e-06	4.15265e-06	4.15265e-06	4.15265e-06
Hcr	inters	2.17641	2.71766	3.19088	4.15634	2.16745	2.64255	3.17097	4.11785	2.2057	2.76321	3.21091	3.95738	2.16916	2.68813	3.15441	4.07593	2.15969	2.63235	3.14701	4.06165	2.18573	2.70422	3.11726	3.84759	2.12084	2.60052	3.06344	3.93169	2.1232	2.55572	3.04005	3.91676	2.18501	2.66322	3.0788	3.79163	2.11038	2.59287	2.96945	3.76536	2.11275	2.52451	2.96443	3.71812	2.10859	2.56768	2.99975	3.71464
	incidence	1.01462	1.01286	1.01059	1.00529	1.01661	1.01373	1.00906	1.00662	1.01495	1.01043	1.00976	1.00715	1.01407	1.01226	1.00985	1.00537	1.01609	1.01322	1.00899	1.00722	1.01425	1.01032	1.00935	1.00843	1.01328	1.01182	1.00964	1.00669	1.01455	1.01225	1.00835	1.00726	1.0121	1.00932	1.00896	1.00811	1.01205	1.01022	1.00981	1.00666	1.01332	1.01101	1.00876	1.00727	1.0124	1.01057	1.00947	1.00738
	loglik	-455.27	-465.455	-469.413	-458.286	-450.145	-465.8	-470.969	-461.42	-453.203	-464.485	-472.44	-475.094	-455.608	-462.802	-467.047	-464.772	-448.005	-461.822	-465.618	-462.319	-455.656	-466.387	-471.346	-477.229	-440.597	-448.059	-451.746	-435.65	-433.201	-448.386	-448.729	-435.489	-440.975	-453.471	-451.163	-453.153	-420.946	-426.022	-427.74	-412.637	-416.286	-429.225	-423.007	-416.782	-426.247	-432.194	-425.676	-425.834
Cau	inters	NA	NA	NA	NA	NA	NA	NA	NA	NA	NA	NA	NA	3.97509	3.97509	3.97509	3.97509	3.97509	3.97509	3.97509	3.97509	3.97509	3.97509	3.97509	3.97509	NA	NA	NA	NA	NA	NA	NA	NA	NA	NA	NA	NA	NA	NA	NA	NA	NA	NA	NA	NA	NA	NA	NA	NA
	incidence	NA	NA	NA	NA	NA	NA	NA	NA	NA	NA	NA	NA	1.00773	1.00773	1.00773	1.00773	1.00773	1.00773	1.00773	1.00773	1.00773	1.00773	1.00773	1.00773	NA	NA	NA	NA	NA	NA	NA	NA	NA	NA	NA	NA	NA	NA	NA	NA	NA	NA	NA	NA	NA	NA	NA	NA
	loglik	NA	NA	NA	NA	NA	NA	NA	NA	NA	NA	NA	NA	NA	NA	NA	NA	NA	NA	NA	NA	NA	NA	NA	NA	NA	NA	NA	NA	NA	NA	NA	NA	NA	NA	NA	NA	NA	NA	NA	NA	NA	NA	NA	NA	NA	NA	NA	NA
Clu	inters	5.4348	6.18604	6.90969	8.62394	4.28245	5.3473	5.94557	6.62664	3.06183	3.69921	4.84227	5.80334	4.84635	5.3639	6.07196	7.37918	3.94909	4.87486	5.57868	6.21169	2.94489	3.53895	4.62541	5.46709	4.54879	5.09319	5.80331	6.8675	3.92764	4.83171	5.39091	5.92775	2.95425	3.56288	4.58108	5.48803	4.46265	5.23733	6.33035	7.8949	3.84473	4.63744	5.13521	5.66994	2.957	3.58534	4.58659	5.48026
	incidence	0.867094	0.817354	0.882772	0.874557	0.980821	0.956785	0.90078	0.913412	0.985219	0.974069	0.986868	0.983559	0.924439	0.892439	0.954045	0.969447	0.97794	0.956326	0.871995	0.874883	0.974815	0.961387	0.963993	0.955885	0.887827	0.832911	0.893462	0.878014	0.96223	0.926914	0.828187	0.829159	0.949051	0.931623	0.934383	0.918731	0.666168	0.578055	0.587409	0.718291	0.933046	0.878112	0.778879	0.742408	0.90409	0.880277	0.878374	0.851568
	loglik	-277.547	-261.925	-237.247	-197.425	-266.597	-247.417	-260.172	-245.795	-324.412	-303.238	-280.897	-271.971	-272.538	-257.585	-240.11	-216.821	-280.604	-274.898	-285.686	-271.276	-329.686	-308.467	-284.286	-273.367	-256.937	-247.471	-238.241	-217.376	-264.821	-248.981	-252.571	-242.858	-317.736	-298.566	-274.802	-270.736	-275.324	-273.745	-269.82	-256.095	-252.964	-236.441	-238.18	-222.433	-307.298	-287.408	-270.037	-260.617
Ala	inters	NA	NA	NA	NA	NA	NA	NA	NA	NA	NA	NA	NA	6.78688	6.78688	6.78688	6.78688	6.78688	6.78688	6.78688	6.78688	6.78688	6.78688	6.78688	6.78688	NA	NA	NA	NA	NA	NA	NA	NA	NA	NA	NA	NA	NA	NA	NA	NA	NA	NA	NA	NA	NA	NA	NA	NA
	incidence	NA	NA	NA	NA	NA	NA	NA	NA	NA	NA	NA	NA	1.08433	1.08433	1.08433	1.08433	1.08433	1.08433	1.08433	1.08433	1.08433	1.08433	1.08433	1.08433	NA	NA	NA	NA	NA	NA	NA	NA	NA	NA	NA	NA	NA	NA	NA	NA	NA	NA	NA	NA	NA	NA	NA	NA
	loglik	NA	NA	NA	NA	NA	NA	NA	NA	NA	NA	NA	NA	NA	NA	NA	NA	NA	NA	NA	NA	NA	NA	NA	NA	NA	NA	NA	NA	NA	NA	NA	NA	NA	NA	NA	NA	NA	NA	NA	NA	NA	NA	NA	NA	NA	NA	NA	NA
Uar	inters	7.89344e-10	0.101079	0.340064	0.638993	1.61287e-11	1.61287e-11	0.147711	0.403155	2.74434e-09	2.74434e-09	0.0556058	0.258093	7.89344e-10	0.107315	0.366409	0.642196	1.61287e-11	1.61287e-11	0.141123	0.417592	2.74434e-09	2.74434e-09	0.0514303	0.278617	7.89344e-10	0.105269	0.365162	0.636379	1.61287e-11	1.61287e-11	0.138893	0.385429	2.74434e-09	2.74434e-09	0.0523415	0.273983	7.89344e-10	0.107573	0.38336	0.632758	1.61287e-11	1.61287e-11	0.148874	0.383752	2.74434e-09	2.74434e-09	0.0533045	0.263497
	incidence	1	0.00842317	1.02191	1.11641	0.999996	0.999996	0.0105736	1.11388	1	1	1.343	1.11012	1	0.0083996	0.960196	1.09741	0.999996	0.999996	0.710965	1.0004	1	1	1.30299	1.03855	1	0.451142	0.874696	1.05835	0.999996	0.999996	0.863987	0.964148	1	1	1.25303	1.01951	1	0.764126	0.855468	0.993959	0.999996	0.999996	0.935864	0.883018	1	1	1.19188	1.00369
	loglik	-5.14109e-06	-67.7534	-184.13	-256.876	0.000951198	0.000951198	-88.3766	-201.408	3.71298e-06	3.71298e-06	-52.4514	-158.805	-5.14109e-06	-71.3045	-196.464	-265.404	0.000951198	0.000951198	-95.7681	-210.741	3.71298e-06	3.71298e-06	-50.0504	-170.087	-5.14109e-06	-77.0202	-194.563	-267.47	0.000951198	0.000951198	-98.248	-199.545	3.71298e-06	3.71298e-06	-48.9948	-166.723	-5.14109e-06	-82.7537	-201.978	-265.873	0.000951198	0.000951198	-105.61	-196.451	3.71298e-06	3.71298e-06	-48.869	-159.066
Mlu	inters	6.03073	7.0502	7.3058	8.75398	7.94382	8.7849	9.98304	10.2717	4.2018	4.85738	5.18201	5.89433	5.38964	6.33924	7.07739	8.34248	7.54287	7.99766	8.9731	10.0967	4.0178	4.5497	4.92373	5.28503	6.02257	6.5826	7.67617	9.35777	6.90326	8.18699	9.06193	10.8662	4.00889	4.61145	5.0624	5.46643	6.24163	7.22793	7.94398	10.6194	7.26309	8.00185	9.09857	10.5844	3.94632	4.53702	5.03487	5.43279
	incidence	0.978577	0.961947	0.962281	0.947931	0.982322	0.996076	0.971284	0.987293	0.99085	0.998805	1.01353	1.01883	0.951257	0.922829	0.906763	0.925112	0.949717	0.998702	0.972357	0.961908	0.96249	0.967375	0.974232	0.97774	0.9107	0.880388	0.844235	0.861426	1.00459	0.981298	0.972964	0.958123	0.940643	0.949792	0.978037	0.985959	0.86886	0.771162	0.727702	0.612033	0.904298	0.900675	0.889351	0.884421	0.930481	0.941522	0.962723	0.962213
	loglik	-353.174	-400.813	-450.382	-445.94	-360.987	-392.285	-415.979	-414.461	-377.487	-371.98	-384.418	-386.514	-381.061	-424.693	-461.971	-466.967	-392.787	-418.094	-436.544	-420.514	-389.911	-400.056	-418.982	-453.668	-328.561	-377.822	-399.247	-383.747	-367.873	-385.564	-403.226	-386.747	-369.854	-374.15	-375.362	-398.824	-314.56	-365.837	-406.367	-409.376	-380.414	-427.997	-440.206	-474.705	-373.788	-380.616	-385.13	-419.289
Mpu	inters	1.4457e-11	1.4457e-11	1.4457e-11	1.4457e-11	1.30141e-09	1.30141e-09	1.30141e-09	1.30141e-09	1.38534e-09	1.38534e-09	1.38534e-09	1.38534e-09	1.4457e-11	1.4457e-11	1.4457e-11	1.4457e-11	1.30141e-09	1.30141e-09	1.30141e-09	1.30141e-09	1.38534e-09	1.38534e-09	1.38534e-09	1.38534e-09	1.4457e-11	1.4457e-11	1.4457e-11	1.4457e-11	1.30141e-09	1.30141e-09	1.30141e-09	1.30141e-09	1.38534e-09	1.38534e-09	1.38534e-09	1.38534e-09	1.4457e-11	1.4457e-11	1.4457e-11	1.4457e-11	1.30141e-09	1.30141e-09	1.30141e-09	1.30141e-09	1.38534e-09	1.38534e-09	1.38534e-09	1.38534e-09
	incidence	1	1	1	1	1	1	1	1	1	1	1	1	1	1	1	1	1	1	1	1	1	1	1	1	1	1	1	1	1	1	1	1	1	1	1	1	1	1	1	1	1	1	1	1	1	1	1	1
	loglik	0.00076151	0.00076151	0.00076151	0.00076151	2.871e-06	2.871e-06	2.871e-06	2.871e-06	-1.21462e-05	-1.21462e-05	-1.21462e-05	-1.21462e-05	0.00076151	0.00076151	0.00076151	0.00076151	2.871e-06	2.871e-06	2.871e-06	2.871e-06	-1.21462e-05	-1.21462e-05	-1.21462e-05	-1.21462e-05	0.00076151	0.00076151	0.00076151	0.00076151	2.871e-06	2.871e-06	2.871e-06	2.871e-06	-1.21462e-05	-1.21462e-05	-1.21462e-05	-1.21462e-05	0.00076151	0.00076151	0.00076151	0.00076151	2.871e-06	2.871e-06	2.871e-06	2.871e-06	-1.21462e-05	-1.21462e-05	-1.21462e-05	-1.21462e-05
Mma	inters	2.20329e-11	2.20329e-11	2.20329e-11	2.20329e-11	6.11151e-10	6.11151e-10	3.44839e-10	3.44839e-10	2.21097e-11	2.21097e-11	1.37994e-09	1.37994e-09	2.20329e-11	2.20329e-11	2.20329e-11	2.20329e-11	6.11151e-10	6.11151e-10	3.44839e-10	3.44839e-10	2.21097e-11	2.21097e-11	1.37994e-09	1.37994e-09	2.20329e-11	2.20329e-11	2.20329e-11	2.20329e-11	6.11151e-10	6.11151e-10	3.44839e-10	3.44839e-10	2.21097e-11	2.21097e-11	1.37994e-09	1.37994e-09	2.20329e-11	2.20329e-11	2.20329e-11	2.20329e-11	6.11151e-10	6.11151e-10	3.44839e-10	3.44839e-10	2.21097e-11	2.21097e-11	1.37994e-09	1.37994e-09
	incidence	1	1	1	1	1	1	1	1	0.999998	0.999998	1	1	1	1	1	1	1	1	1	1	0.999998	0.999998	1	1	1	1	1	1	1	1	1	1	0.999998	0.999998	1	1	1	1	1	1	1	1	1	1	0.999998	0.999998	1	1
	loglik	0.000826112	0.000826112	0.000826112	0.000826112	-9.22486e-07	-9.22486e-07	-4.9033e-05	-4.9033e-05	0.000803928	0.000803928	-1.00597e-05	-1.00597e-05	0.000826112	0.000826112	0.000826112	0.000826112	-9.22486e-07	-9.22486e-07	-4.9033e-05	-4.9033e-05	0.000803928	0.000803928	-1.00597e-05	-1.00597e-05	0.000826112	0.000826112	0.000826112	0.000826112	-9.22486e-07	-9.22486e-07	-4.9033e-05	-4.9033e-05	0.000803928	0.000803928	-1.00597e-05	-1.00597e-05	0.000826112	0.000826112	0.000826112	0.000826112	-9.22486e-07	-9.22486e-07	-4.9033e-05	-4.9033e-05	0.000803928	0.000803928	-1.00597e-05	-1.00597e-05
Ggu	inters	NA	NA	NA	NA	9.97251	NA	NA	NA	7.74665	9.27413	8.99889	9.61474	5.34804e-11	5.34804e-11	5.34804e-11	5.34804e-11	12.3666	12.3666	12.3666	12.3666	9.6404	11.3029	11.9354	12.2666	NA	NA	NA	NA	16.9048	NA	NA	NA	12.4137	13.6538	14.5	17	NA	NA	NA	NA	21.1176	NA	NA	NA	12.9285	14.44	16.2727	19.8889
	incidence	NA	NA	NA	NA	2.76257e-13	NA	NA	NA	2.71429e-13	2.75126e-13	2.74513e-13	2.75877e-13	0.999999	0.999999	0.999999	0.999999	2.78717e-13	2.78717e-13	2.78717e-13	2.78717e-13	0.100105	0.0254882	0.0230168	2.78531e-13	NA	NA	NA	NA	2.77563e-13	NA	NA	NA	0.115459	0.0178904	0.0159848	2.76504e-13	NA	NA	NA	NA	2.74998e-13	NA	NA	NA	0.106997	0.0161095	0.0128789	2.75867e-13
	loglik	NA	NA	NA	NA	-190.892	NA	NA	NA	-247.077	-209.964	-219.966	-201.085	NA	NA	NA	NA	-215.191	NA	NA	NA	-263.814	-242.1	-232.463	-236.739	NA	NA	NA	NA	-216.386	NA	NA	NA	-236.097	-244.099	-248.391	-241.752	NA	NA	NA	NA	-217.73	NA	NA	NA	-246.659	-255.724	-251.783	-236.578
Llu	inters	1.27689	1.46058	1.69753	2.11244	1.12168	1.43623	1.61871	1.99594	1.15304	1.46255	1.62131	1.9974	1.27542	1.51084	1.74965	2.17872	1.13484	1.45876	1.6638	2.08814	1.15	1.47203	1.66324	2.07258	1.27171	1.50706	1.73701	2.1678	1.12082	1.4566	1.64304	2.06979	1.16597	1.47048	1.65811	2.07173	1.27417	1.4989	1.71994	2.14102	1.12261	1.44734	1.63616	2.07563	1.15185	1.46453	1.65218	2.05495
	incidence	0.624914	0.697709	0.71892	0.748128	0.626237	0.624658	0.685047	0.778349	0.625355	0.625802	0.705604	0.792782	0.619497	0.638552	0.685255	0.708318	0.624168	0.622498	0.657918	0.721014	0.627247	0.625321	0.665634	0.73588	0.62515	0.644379	0.684431	0.702081	0.62625	0.625416	0.668842	0.707379	0.622532	0.625001	0.672604	0.717604	0.624338	0.656906	0.672152	0.695563	0.62475	0.622012	0.678229	0.700237	0.62437	0.630112	0.663362	0.719639
	loglik	-375.163	-399.552	-409.138	-436.2	-357.045	-391.094	-406.92	-442.844	-358.725	-392.535	-410.635	-447.377	-376.859	-399.399	-410.266	-434.81	-357.062	-392.144	-406.968	-437.984	-358.619	-392.478	-407.267	-443.963	-374.416	-396.112	-406.371	-428.943	-353.241	-387.895	-406.149	-435.205	-357.003	-390.924	-406.566	-440.719	-374.461	-396.967	-402.321	-426.252	-351.994	-389.445	-404.776	-430.92	-356.388	-390.314	-403.671	-437.092
Fsi	inters	2.17051	2.77669	4.45735	5.92389	2.1198	2.84874	3.17673	4.21603	2.64186	3.397	4.00307	4.29378	2.17351	2.718	4.40476	6.08166	2.19082	2.74369	3.08331	4.18788	2.83538	3.42491	4.01309	4.41274	2.64007	3.64658	5.33216	7.15885	2.55607	3.46202	3.66	4.73098	2.92868	3.35163	4.1022	4.3551	3.58812	6.28921	9.41263	13.4478	3.51875	4.7862	5.57601	7.87265	3.00732	3.64323	4.47281	5.13248
	incidence	0.865844	0.978923	0.986725	1.00857	0.984197	0.974073	0.986136	0.990754	0.967942	0.979844	0.979826	0.99083	0.869955	0.964101	0.980074	1.00218	0.965424	0.965819	0.973861	0.986259	0.928719	0.951188	0.953171	0.962184	0.743413	0.830097	0.907358	0.991863	0.895767	0.881586	0.901938	0.942212	0.882543	0.913624	0.872144	0.918904	0.55951	0.338314	0.418348	0.494635	0.737067	0.722805	0.689491	0.650203	0.890622	0.917418	0.844795	0.883119
	loglik	-235.934	-271.444	-253.218	-245.393	-233.621	-215.836	-215.64	-220.715	-200.129	-185.201	-188.337	-183.403	-231.912	-274.338	-264.755	-261.991	-222.14	-220.904	-228.712	-227.074	-187.885	-181.581	-189.227	-184.013	-234.625	-297.56	-310.567	-320.951	-233.254	-228.588	-251.641	-272.328	-192.912	-196.864	-207.461	-217.033	-262.673	-315.553	-346.288	-352.105	-240.389	-240.174	-256.708	-285.829	-207.326	-202.189	-216.374	-228.719
Lly	inters	2.83063e-11	2.83063e-11	2.83063e-11	2.83063e-11	1.2105e-10	1.2105e-10	1.2105e-10	1.2105e-10	4.94852e-11	4.94852e-11	4.94852e-11	4.94852e-11	2.83063e-11	2.83063e-11	2.83063e-11	2.83063e-11	1.2105e-10	1.2105e-10	1.2105e-10	1.2105e-10	4.94852e-11	4.94852e-11	4.94852e-11	4.94852e-11	2.83063e-11	2.83063e-11	2.83063e-11	2.83063e-11	1.2105e-10	1.2105e-10	1.2105e-10	1.2105e-10	4.94852e-11	4.94852e-11	4.94852e-11	4.94852e-11	2.83063e-11	2.83063e-11	2.83063e-11	2.83063e-11	1.2105e-10	1.2105e-10	1.2105e-10	1.2105e-10	4.94852e-11	4.94852e-11	4.94852e-11	4.94852e-11
	incidence	1	1	1	1	1	1	1	1	1	1	1	1	1	1	1	1	1	1	1	1	1	1	1	1	1	1	1	1	1	1	1	1	1	1	1	1	1	1	1	1	1	1	1	1	1	1	1	1
	loglik	0.00056122	0.00056122	0.00056122	0.00056122	0.000135252	0.000135252	0.000135252	0.000135252	0.000179386	0.000179386	0.000179386	0.000179386	0.00056122	0.00056122	0.00056122	0.00056122	0.000135252	0.000135252	0.000135252	0.000135252	0.000179386	0.000179386	0.000179386	0.000179386	0.00056122	0.00056122	0.00056122	0.00056122	0.000135252	0.000135252	0.000135252	0.000135252	0.000179386	0.000179386	0.000179386	0.000179386	0.00056122	0.00056122	0.00056122	0.00056122	0.000135252	0.000135252	0.000135252	0.000135252	0.000179386	0.000179386	0.000179386	0.000179386
Lpa	inters	17.1657	18.1056	19.1641	20.8566	17.0239	18.5106	20.6808	22.7687	16.1087	18.0351	19.6889	18.9594	24.7154	28.8962	30.0618	35.8321	26.9033	38.6728	45.2282	56.1671	22.5336	33.5421	35.9363	36.0199	41.0948	57.7859	75.921	81.677	31.0976	58.502	90.2009	186.78	40.8015	62.7736	87.5723	112.813	33.6475	36.0041	39.0236	39.0794	20.7788	22.9004	26.136	26.3008	18.8201	21.0878	21.829	23.9948
	incidence	0.859583	0.808121	0.829236	0.8012	0.86351	0.818543	0.828164	0.800179	0.742084	0.712758	0.594125	0.782676	0.484906	0.335009	0.33523	0.357234	0.512734	0.214009	0.189122	0.124384	0.214472	0.102677	0.0827664	0.0905464	0.473005	0.390917	0.29775	0.179538	0.776364	0.0996415	0.0215225	0.0178337	0.0495745	0.027617	0.00709684	0.0015061	0.724543	0.690201	0.674285	0.670281	0.942063	0.894809	0.922916	0.954001	0.851234	0.868522	0.913445	0.902564
	loglik	-348.415	-358.914	-351.113	-339.651	-375.354	-381.286	-336.893	-310.286	-320.819	-311.81	-312.135	-314.689	-449.828	-466.97	-490.444	-427.864	-510.16	-448.56	-429.864	-372.943	-504.887	-412.908	-434.01	-448.436	-429.035	-344.045	-273.084	-296.276	-708.266	-693.105	-595.713	Inf	-604.312	-502.734	-402.657	-334.648	-283.278	-279.127	-274.141	-288.311	-373.188	-380.203	-344.126	-334.593	-439.378	-428.825	-432.578	-414.763
Hic	inters	5.80628	6.68858	7.64512	8.55268	5.29089	5.98239	6.29621	7.90489	5.48042	5.98215	6.23023	7.00959	5.65414	6.33385	6.88359	7.49852	5.46998	5.78715	5.76895	6.66257	5.54841	5.93302	6.06876	6.47154	5.50854	6.5032	6.7872	8.75344	5.37812	5.64238	6.36086	8.07056	5.17998	5.83813	6.89136	8.96464	5.70322	6.26906	6.88349	8.00299	5.49215	5.77571	6.48237	7.42096	5.29403	5.71762	6.74664	7.28234
	incidence	1.03299	1.03058	1.02768	1.02416	1.03389	1.03272	1.0337	1.02728	1.03303	1.03298	1.03279	1.03011	1.04093	1.04122	1.0425	1.04291	1.0423	1.04502	1.04769	1.0475	1.04058	1.04141	1.04425	1.04539	1.04414	1.04343	1.04663	1.04267	1.04611	1.05023	1.04945	1.0468	1.04483	1.04469	1.04309	1.03976	1.03897	1.03994	1.04169	1.03934	1.03976	1.04362	1.04089	1.04201	1.03831	1.03919	1.03547	1.03641
	loglik	-323.986	-330.167	-358.975	-382.048	-316.607	-322.502	-341.182	-351.17	-286.72	-289.446	-324.263	-357.34	-272.673	-261.421	-259.72	-249.465	-270.056	-263.002	-297.905	-265.244	-257.647	-271.85	-275.963	-270.992	-333.645	-349.08	-397.013	-385.049	-320.967	-345.29	-380.946	-344.424	-369.398	-400.216	-414.354	-398.797	-295.236	-318.465	-326.967	-341.262	-290.61	-307.467	-321.974	-299.122	-347.068	-393.713	-430.43	-508.37
Gge	inters	10.3406	10.9091	11.4032	12.7566	9.49109	10.1386	10.5593	11.1345	9.10443	9.48641	10.3109	10.9495	10.4207	10.9324	11.6915	13.1225	9.44369	10.0825	10.6917	11.4118	8.99825	9.50831	10.3951	11.4472	9.02993	9.23935	10.6564	12.6209	8.51023	8.96482	9.71994	10.388	8.38569	8.84924	9.53922	10.218	9.22927	9.50465	10.5289	12.5042	7.98472	8.57571	9.41697	10.1574	7.38464	7.53378	8.42082	9.23642
	incidence	1.00358	0.998221	1.00871	1.01355	1.01561	1.01261	1.02166	1.03599	0.980923	1.00583	1.02279	1.03407	0.988748	0.985616	0.985477	0.988044	1.0091	1.00587	1.00768	1.01884	0.972893	0.988477	1.00089	1.01752	0.981438	0.978091	0.959018	0.943692	1.00718	0.997602	0.993996	1.0015	0.973342	0.987861	0.99453	1.00999	0.949227	0.938666	0.910689	0.836523	1.00585	0.992535	0.97784	0.976925	0.980888	1.00247	1.0032	1.01192
	loglik	-255.467	-277.517	-317.531	-356.961	-271.405	-281.883	-311.332	-348.592	-312.971	-299.998	-314.018	-328.437	-248.748	-275.386	-317.848	-354.398	-262.087	-271.423	-303.222	-344.139	-308.921	-301.919	-313.97	-309.811	-278	-321.545	-352.791	-375.206	-267.61	-290.431	-314.12	-364.356	-303.921	-295.605	-314.428	-325.791	-272.093	-322.782	-387.437	-424.897	-272.518	-293.851	-321.862	-379.107	-309.585	-307.655	-318.047	-324.409
Rru	inters	7.10798	9.77842	9.90677	11.1001	7.64152	9.23779	9.77845	10.2447	7.0792	8.85632	11.0639	10.3605	7.38251	10.4445	10.6201	12.3295	8.10315	9.40585	9.49525	11.1065	7.27704	9.05974	11.4208	11.6639	8.23117	9.5152	11.2591	11.7123	8.05564	9.28466	9.72273	11.4156	7.44254	9.3307	12.202	12.0321	7.9006	9.76473	12.2299	12.3609	8.40565	9.95338	10.7286	11.618	7.3131	8.97546	11.0043	10.9107
	incidence	1.00123	0.994881	1.08156	1.12513	0.979117	1.05304	1.08763	1.10482	0.98988	0.981669	0.988569	1.07556	0.998581	0.992916	1.07665	1.10948	0.978947	1.05408	1.09809	1.09314	0.985697	0.979905	0.985628	1.05926	0.972335	1.01882	1.04007	1.09094	0.969843	1.04508	1.08228	1.07634	0.98264	0.976201	0.979426	1.0502	0.953758	0.993191	1.02178	1.07308	0.948094	1.01021	1.04372	1.05075	0.978696	0.977242	0.983502	1.0586
	loglik	-465.741	-448.368	-393.398	-374.683	-502.728	-435.69	-456.526	-477.809	-495.578	-496.728	-517.159	-516.444	-479.002	-447.618	-394.536	-385.88	-496.323	-449.077	-482.542	-487.311	-509.913	-513.459	-536.083	-526.357	-442.028	-424.716	-391.394	-410.876	-484.124	-445.778	-465.628	-470.584	-504.189	-506.096	-501.302	-505.325	-463.826	-434.512	-370.677	-416.963	-458.277	-417.725	-419.288	-442.011	-482.584	-479.267	-485.524	-476.045
Cib	inters	8.84136	10.088	12.6835	15.3135	8.52452	9.11016	9.32818	11.31	8.40084	9.28388	9.40415	11.2289	9.36022	10.6015	12.6251	15.1702	8.94372	9.10091	9.91409	11.8394	8.61318	9.50612	9.61193	11.4568	11.3486	11.9076	14.1721	19.5335	9.39531	9.63125	10.886	13.7638	9.31018	10.2886	11.7238	14.9289	13.0558	13.6412	15.2673	23.8678	10.0273	10.6278	11.8637	15.4488	9.08919	10.2427	11.3806	14.88
	incidence	0.95562	0.983924	0.900512	0.858603	1.01989	1.05966	1.15958	1.27446	0.984502	0.962946	1.0055	1.01959	1.05784	1.15856	1.08473	0.997776	1.07369	1.16227	1.19434	1.28145	1.16139	1.11082	1.18266	1.2474	0.770661	0.797385	0.782056	0.597016	1.00928	1.0923	0.996514	1.02012	0.874535	0.896529	0.848507	0.854674	0.675546	0.715077	0.686964	0.46893	0.94719	1.05953	0.950748	0.886828	0.811623	0.821946	0.811044	0.790737
	loglik	-461.957	-465.452	-450.584	-458.382	-389.38	-425.923	-451.604	-423.387	-398.999	-445.252	-510.56	-516.133	-426.525	-419.076	-416.187	-427.169	-383.487	-416.285	-422.084	-400.245	-380.111	-419.456	-462.438	-459.253	-424.995	-483.162	-493.182	-484.41	-362.33	-395.314	-427.199	-381.941	-378.373	-397.455	-412.251	-385.941	-430.166	-489.793	-524.336	-458.977	-361.912	-384.753	-424.905	-394.895	-383.043	-402.751	-409.155	-366.59
Cpy	inters	17.3125	18.4388	17.61	20.4929	15.2284	16.0066	18.0815	17.911	11.6511	13.683	18.0385	20.2265	11.7201	14.4585	14.8141	14.9883	10.2606	11.6255	12.2731	13.8416	8.21334	9.74225	12.8083	13.3805	11.4596	15.1231	18.402	22.488	9.58226	10.5518	12.0342	14.8764	7.71075	8.71323	10.6054	11.7438	11.1143	14.3369	17.1211	19.2108	8.39914	9.48913	12.8434	15.606	7.08479	7.48916	8.54772	9.47993
	incidence	1.21265	1.22622	1.25913	1.24119	1.23374	1.24782	1.24042	1.25298	1.26151	1.26262	1.24965	1.22289	1.31731	1.27541	1.27916	1.29264	1.33999	1.32002	1.32203	1.31197	1.33896	1.32399	1.27904	1.26562	1.35837	1.28729	1.24764	1.19694	1.34933	1.38172	1.35891	1.32547	1.40705	1.39655	1.378	1.36044	1.2997	1.25401	1.21316	1.18165	1.31861	1.34792	1.28746	1.26039	1.38485	1.3858	1.38254	1.35693
	loglik	-246.316	-246.988	-289.922	-256.384	-268.74	-292.105	-266.828	-309.369	-348.782	-331.937	-258.01	-246.593	-217.936	-176.812	-191.328	-199.486	-242.363	-236.94	-237.379	-238.138	-364.335	-340.469	-276.021	-289.784	-268.012	-280.471	-284.913	-319.752	-309.807	-348.434	-384.688	-416.253	-330.384	-367.329	-376.691	-431.368	-367.407	-374.984	-375.292	-392.932	-427.625	-471.914	-448.778	-456.714	-360.505	-426.011	-452.205	-511.635
Oam	inters	4.95406	5.1336	5.73675	7.54898	4.87851	5.27872	6.88504	8.70916	4.94524	5.45893	5.9262	7.40844	6.32486	6.85497	8.19371	10.0742	5.50896	6.18085	9.60782	8.39396	6.14675	7.22352	8.29282	10.9033	5.38812	6.19208	7.76982	8.52594	4.86551	5.91192	6.60085	8.21871	6.77465	8.61958	9.81742	12.7093	8.45732	10.2975	12.357	12.8015	7.91116	10.727	15.0181	19.1241	7.1148	8.77786	8.85871	10.3724
	incidence	1.01187	1.0069	1.00354	0.986708	1.00661	1.00564	1.00332	0.998513	1.00431	1.01275	1.0301	1.0312	1.01519	1.01279	1.00768	1.00809	1.02679	1.02679	1.00965	1.10031	1.02351	1.05402	1.04825	1.02402	1.00714	1.00553	0.997158	1.07517	1.01671	1.01637	1.08663	1.08728	0.988165	0.985968	0.975461	0.94467	0.885011	0.906283	0.920007	0.985669	0.842327	0.811666	0.783593	0.787857	0.926602	0.948176	0.948695	0.946547
	loglik	-304.724	-342.803	-349.759	-334.57	-351.785	-404.709	-373.725	-342.417	-394.966	-408.211	-394.307	-375.336	-322.098	-350.016	-359.315	-389.207	-365.056	-427.083	-373.57	-342.548	-371.986	-352.437	-380.19	-378.369	-365.59	-395.253	-407.881	-368.001	-404.822	-432.437	-364.657	-355.3	-343.261	-303.435	-321.588	-313.015	-405.067	-402.258	-393.827	-424.729	-396.013	-426.996	-420.347	-426.548	-333.625	-287.711	-355.357	-401.155
		V1	V2	V3	V4	V5	V6	V7	V8	V9	V10	V11	V12	V17	V18	V19	V20	V21	V22	V23	V24	V25	V26	V27	V28	V33	V34	V35	V36	V37	V38	V39	V40	V41	V42	V43	V44	V49	V50	V51	V52	V53	V54	V55	V56	V57	V58	V59	V60
		4.80183e-46	1.80818e-42	2.73188e-43	3.2515e-41	1.2159e-46	2.8242e-46	3.73595e-46	1.04054e-44	2.78031e-44	2.88935e-42	2.50974e-41	1.17283e-39	1.27479e-40	3.24377e-40	1.85456e-40	1.30284e-39	3.84025e-44	1.5258e-42	5.24157e-42	8.34719e-42	1.99217e-37	8.59599e-35	1.74825e-37	2.39598e-38	7.10183e-40	1.73938e-40	4.07304e-39	2.75839e-39	7.00965e-43	4.50445e-41	4.94921e-42	1.36942e-41	1.03058e-34	3.38486e-34	1.23937e-34	1.81293e-35	5.66421e-44	7.34155e-46	1.51884e-44	6.20839e-45	3.29097e-46	7.8802e-48	6.50958e-48	1.2535e-46	1.94923e-34	1.05403e-37	2.25059e-38	1.66226e-37
		1.30014e-05	0.000177095	9.56631e-05	0.000460114	8.67423e-05	0.000113117	0.000123575	0.000357238	8.45285e-05	0.000382472	0.000781925	0.00281974	0.000229266	0.000313514	0.000259897	0.000501098	0.000302516	0.00100357	0.000839402	0.000978702	0.000921383	0.00763817	0.00275973	0.00247708	0.000725892	0.000452161	0.00131117	0.00114878	0.000433368	0.00170929	0.00147634	0.00115262	0.00266039	0.00708791	0.00867356	0.00776199	1.85217e-05	8.51825e-06	1.23147e-05	9.34155e-06	6.84715e-06	6.80947e-06	6.43142e-06	1.57369e-05	0.000115345	7.74716e-05	7.80767e-05	8.84783e-05
		NA	NA	NA	NA	NA	NA	NA	NA	NA	NA	NA	NA	NA	NA	NA	NA	NA	NA	NA	NA	NA	NA	NA	NA	NA	NA	NA	NA	NA	NA	NA	NA	NA	NA	NA	NA	NA	NA	NA	NA	NA	NA	NA	NA	NA	NA	NA	NA
		8.17354e-12	1.12302e-26	9.71397e-47	1.58136e-69	1.51148e-16	3.97301e-33	5.20674e-58	1.4657e-90	3.95327e-08	1.92911e-22	3.61631e-48	5.20908e-82	3.51236e-13	2.3714e-29	2.84589e-49	7.42162e-76	3.95342e-18	3.24912e-38	3.56399e-59	3.46858e-97	5.06046e-10	2.75616e-27	3.74356e-59	8.13368e-97	2.3712e-13	9.70008e-30	3.36282e-56	3.79679e-84	1.67379e-18	1.72997e-38	1.9115e-64	2.05073e-111	5.9785e-11	3.57108e-30	9.29339e-66	1.68121e-111	3.90003e-13	6.38587e-30	1.85998e-55	7.79185e-86	2.12831e-17	2.49197e-37	5.08478e-62	4.76853e-107	5.95461e-11	6.96983e-29	3.21146e-64	9.4063e-109
		0.000412942	0.000746867	0.000233267	0.00164175	0.000159833	0.00102083	5.33145e-05	0.00172483	0.000729297	0.00662851	0.00607476	0.00399951	0.000204265	0.000149002	0.00013451	0.000941176	2.66689e-05	2.31556e-05	2.33503e-05	7.86321e-05	8.03074e-05	0.000128712	2.91104e-05	0.000488876	0.000114653	6.98136e-05	1.70638e-05	7.28038e-05	1.41249e-05	1.22865e-05	6.26659e-06	8.37983e-06	2.64575e-05	1.38158e-05	3.55024e-06	2.61734e-06	0.000144553	3.85824e-05	2.66897e-05	2.86276e-05	2.42902e-05	1.61572e-05	1.35885e-05	1.4822e-05	2.64053e-05	2.29069e-05	4.77124e-06	4.96447e-06
		NA	NA	NA	NA	NA	NA	NA	NA	NA	NA	NA	NA	NA	NA	NA	NA	NA	NA	NA	NA	NA	NA	NA	NA	NA	NA	NA	NA	NA	NA	NA	NA	NA	NA	NA	NA	NA	NA	NA	NA	NA	NA	NA	NA	NA	NA	NA	NA
		0.991229	0.991229	0.991229	0.991229	0.99585	0.99585	0.99585	0.99585	0.99836	0.99836	0.99836	0.99836	0.991229	0.991229	0.991229	0.991229	0.99585	0.99585	0.99585	0.99585	0.99836	0.99836	0.99836	0.99836	0.991229	0.991229	0.991229	0.991229	0.99585	0.99585	0.99585	0.99585	0.99836	0.99836	0.99836	0.99836	0.991229	0.991229	0.991229	0.991229	0.99585	0.99585	0.99585	0.99585	0.99836	0.99836	0.99836	0.99836
		1	1	1	1	1	1	1	1	1	1	1	1	1	1	1	1	1	1	1	1	1	1	1	1	1	1	1	1	1	1	1	1	1	1	1	1	1	1	1	1	1	1	1	1	1	1	1	1
		NA	NA	NA	NA	NA	NA	NA	NA	NA	NA	NA	NA	NA	NA	NA	NA	NA	NA	NA	NA	NA	NA	NA	NA	NA	NA	NA	NA	NA	NA	NA	NA	NA	NA	NA	NA	NA	NA	NA	NA	NA	NA	NA	NA	NA	NA	NA	NA
		0.995876	0.995876	0.995876	0.995876	0.99939	0.99939	0.99939	0.99939	0.997029	0.997029	0.997029	0.997029	0.995876	0.995876	0.995876	0.995876	0.99939	0.99939	0.99939	0.99939	0.997029	0.997029	0.997029	0.997029	0.995876	0.995876	0.995876	0.995876	0.99939	0.99939	0.99939	0.99939	0.997029	0.997029	0.997029	0.997029	0.995876	0.995876	0.995876	0.995876	0.99939	0.99939	0.99939	0.99939	0.997029	0.997029	0.997029	0.997029
		1	1	1	1	1	1	1	1	1	1	1	1	1	1	1	1	1	1	1	1	1	1	1	1	1	1	1	1	1	1	1	1	1	1	1	1	1	1	1	1	1	1	1	1	1	1	1	1
		NA	NA	NA	NA	NA	NA	NA	NA	NA	NA	NA	NA	NA	NA	NA	NA	NA	NA	NA	NA	NA	NA	NA	NA	NA	NA	NA	NA	NA	NA	NA	NA	NA	NA	NA	NA	NA	NA	NA	NA	NA	NA	NA	NA	NA	NA	NA	NA
		3.34607e-83	2.16e-81	7.92922e-79	1.28215e-80	0.0269062	0.0171756	0.00909246	0.00545666	0.999011	0.999011	0.999011	0.999011	4.05171e-78	2.21773e-76	6.86872e-74	1.31163e-75	0.0219602	0.0138532	0.00922976	0.00425408	0.999011	0.999011	0.999011	0.999011	1.54836e-71	6.7378e-70	8.17847e-67	3.69256e-69	0.011057	0.011057	0.00728759	0.0032973	0.999011	0.999011	0.999011	0.999011	2.40678e-73	1.38857e-72	2.54863e-70	8.84605e-73	0.00529153	0.00529153	0.00337124	0.00191316	0.999011	0.999011	0.999011	0.999011
		0.356595	0.347163	0.333035	0.348901	1.52652e-06	1.88947e-06	2.52054e-06	3.09323e-06	1	1	1	1	0.126615	0.121606	0.111348	0.119026	1.35646e-06	1.6795e-06	2.1382e-06	2.91011e-06	1	1	1	1	0.0309535	0.029269	0.0252384	0.0284223	1.58025e-06	1.58025e-06	2.01229e-06	2.73775e-06	1	1	1	1	0.0088959	0.00858721	0.00771172	0.00911626	1.73212e-06	1.73212e-06	2.20075e-06	2.84812e-06	1	1	1	1
		NA	NA	NA	NA	NA	NA	NA	NA	NA	NA	NA	NA	NA	NA	NA	NA	NA	NA	NA	NA	NA	NA	NA	NA	NA	NA	NA	NA	NA	NA	NA	NA	NA	NA	NA	NA	NA	NA	NA	NA	NA	NA	NA	NA	NA	NA	NA	NA
		0.983846	5.20234e-18	4.16917e-20	5.05377e-11	0.988484	5.17859e-07	5.37139e-23	8.52694e-13	0.99671	0.99671	1.41914e-18	2.7022e-09	0.983846	2.4083e-17	7.34752e-20	6.49826e-11	0.988484	5.17859e-07	4.41844e-22	2.73816e-12	0.99671	0.99671	2.73188e-22	4.98953e-12	0.983846	1.25571e-16	5.58816e-19	1.0142e-10	0.988484	5.17859e-07	2.88542e-21	1.01688e-11	0.99671	0.99671	6.44173e-24	1.55174e-12	0.983846	9.56266e-16	5.75853e-18	1.20076e-08	0.988484	5.17859e-07	2.3436e-21	3.29191e-11	0.99671	0.99671	1.35537e-24	3.17608e-13
		1	0.394384	0.234494	0.40688	1	0.772774	0.0914042	0.830229	1	1	0.093263	0.035675	1	0.421556	0.165261	0.339008	1	0.772774	0.645471	0.85506	1	1	0.451328	0.289418	1	0.450379	0.096879	0.235282	1	0.772774	0.939572	0.683291	1	1	0.969855	0.449092	1	0.48596	0.076793	0.0136152	1	0.772774	0.658883	0.995085	1	1	0.564845	0.709704
		NA	NA	NA	NA	NA	NA	NA	NA	NA	NA	NA	NA	NA	NA	NA	NA	NA	NA	NA	NA	NA	NA	NA	NA	NA	NA	NA	NA	NA	NA	NA	NA	NA	NA	NA	NA	NA	NA	NA	NA	NA	NA	NA	NA	NA	NA	NA	NA
		0.998899	0.998899	0.998899	0.998899	0.982357	0.982357	0.982357	0.982357	0.998221	0.998221	0.998221	0.998221	0.998899	0.998899	0.998899	0.998899	0.982357	0.982357	0.982357	0.982357	0.998221	0.998221	0.998221	0.998221	0.998899	0.998899	0.998899	0.998899	0.982357	0.982357	0.982357	0.982357	0.998221	0.998221	0.998221	0.998221	0.998899	0.998899	0.998899	0.998899	0.982357	0.982357	0.982357	0.982357	0.998221	0.998221	0.998221	0.998221
		1	1	1	1	1	1	1	1	1	1	1	1	1	1	1	1	1	1	1	1	1	1	1	1	1	1	1	1	1	1	1	1	1	1	1	1	1	1	1	1	1	1	1	1	1	1	1	1
		NA	NA	NA	NA	NA	NA	NA	NA	NA	NA	NA	NA	NA	NA	NA	NA	NA	NA	NA	NA	NA	NA	NA	NA	NA	NA	NA	NA	NA	NA	NA	NA	NA	NA	NA	NA	NA	NA	NA	NA	NA	NA	NA	NA	NA	NA	NA	NA
		4.49659e-118	4.92241e-182	1.37853e-273	0	1.4649e-117	7.51464e-197	2.26563e-267	0	6.51484e-113	3.19102e-170	1.01939e-240	6.01562e-292	9.62362e-92	1.36238e-147	1.33562e-220	1.33573e-275	9.54597e-97	4.93331e-165	1.55868e-222	2.64399e-286	4.14259e-93	1.35762e-137	8.20532e-195	6.39516e-251	1.57513e-90	1.76819e-143	2.48288e-210	5.60824e-268	4.45741e-91	1.96879e-156	2.28146e-209	1.21308e-271	8.90505e-91	1.46727e-130	5.22301e-188	4.47897e-232	1.35782e-86	1.56888e-139	2.3574e-209	4.45547e-256	1.69869e-82	1.39184e-147	9.16066e-200	1.37243e-260	6.26294e-81	5.68635e-122	2.01971e-174	7.57492e-218
		0.00722093	0.00793683	0.00100065	0.200229	0.00922627	0.0189558	0.00388287	0.0374097	0.0325888	0.0760003	0.153639	0.504961	0.0140269	0.0103389	0.00552717	0.332806	0.0100047	0.0142251	0.0285192	0.249519	0.0285497	0.154481	0.402883	0.688744	0.0242917	0.00695652	0.0121409	0.158548	0.0146368	0.0222915	0.0743814	0.313288	0.0359408	0.161358	0.352786	0.607612	0.0354763	0.0151472	0.00726208	0.411722	0.062306	0.0550689	0.0593072	0.342135	0.208205	0.387034	0.723269	0.408506
		NA	NA	NA	NA	NA	NA	NA	NA	NA	NA	NA	NA	NA	NA	NA	NA	NA	NA	NA	NA	NA	NA	NA	NA	NA	NA	NA	NA	NA	NA	NA	NA	NA	NA	NA	NA	NA	NA	NA	NA	NA	NA	NA	NA	NA	NA	NA	NA
		0.997453	0.997453	0.997453	0.997453	0.996829	0.996829	0.996829	0.996829	0.985663	0.985663	0.985663	0.985663	0.997453	0.997453	0.997453	0.997453	0.996829	0.996829	0.996829	0.996829	0.985663	0.985663	0.985663	0.985663	0.997453	0.997453	0.997453	0.997453	0.996829	0.996829	0.996829	0.996829	0.985663	0.985663	0.985663	0.985663	0.997453	0.997453	0.997453	0.997453	0.996829	0.996829	0.996829	0.996829	0.985663	0.985663	0.985663	0.985663
		1	1	1	1	1	1	1	1	1	1	1	1	1	1	1	1	1	1	1	1	1	1	1	1	1	1	1	1	1	1	1	1	1	1	1	1	1	1	1	1	1	1	1	1	1	1	1	1
		NA	NA	NA	NA	NA	NA	NA	NA	NA	NA	NA	NA	NA	NA	NA	NA	NA	NA	NA	NA	NA	NA	NA	NA	NA	NA	NA	NA	NA	NA	NA	NA	NA	NA	NA	NA	NA	NA	NA	NA	NA	NA	NA	NA	NA	NA	NA	NA
		4.05104e-05	3.04392e-11	1.65283e-30	2.59368e-67	0.000150881	1.16788e-13	8.42354e-22	3.67871e-52	7.54007e-08	3.24071e-17	1.07678e-35	3.73888e-76	2.19241e-05	2.50371e-14	1.70229e-37	6.5796e-84	7.91895e-05	2.33837e-14	6.10912e-30	5.97958e-69	3.20882e-08	1.13889e-20	2.48399e-42	5.76193e-89	1.25696e-05	5.28644e-17	2.00774e-42	5.13148e-92	3.14906e-05	1.61748e-14	1.44838e-33	2.57606e-75	1.62913e-08	2.78973e-23	1.81781e-45	2.97665e-91	6.54682e-06	2.51176e-19	2.46747e-47	9.9862e-93	1.45034e-05	8.3783e-15	1.10704e-36	5.54141e-78	1.19366e-08	4.21963e-24	2.50979e-46	7.38929e-93
		0.552214	0.162915	0.127377	0.546891	0.417942	0.499321	0.189985	0.415481	0.583355	0.610731	0.794065	0.798847	0.3275	0.946325	0.994341	0.160831	0.240347	0.234273	0.455556	0.305412	0.258289	0.543839	0.341678	0.179356	0.200639	0.362645	0.291607	0.0144546	0.116857	0.101435	0.112847	0.051823	0.125334	0.176337	0.120318	0.0741359	0.119804	0.0976965	0.045115	0.00426249	0.0686772	0.058125	0.0248855	0.0139072	0.0976465	0.116159	0.0868842	0.0468994
		NA	NA	NA	NA	NA	NA	NA	NA	NA	NA	NA	NA	NA	NA	NA	NA	NA	NA	NA	NA	NA	NA	NA	NA	NA	NA	NA	NA	NA	NA	NA	NA	NA	NA	NA	NA	NA	NA	NA	NA	NA	NA	NA	NA	NA	NA	NA	NA
		0.997442	0.997442	0.997442	0.997442	0.998709	0.998709	0.998709	0.998709	0.989712	0.989712	0.989712	0.989712	0.997442	0.997442	0.997442	0.997442	0.998709	0.998709	0.998709	0.998709	0.989712	0.989712	0.989712	0.989712	0.997442	0.997442	0.997442	0.997442	0.998709	0.998709	0.998709	0.998709	0.989712	0.989712	0.989712	0.989712	0.997442	0.997442	0.997442	0.997442	0.998709	0.998709	0.998709	0.998709	0.989712	0.989712	0.989712	0.989712
		1	1	1	1	1	1	1	1	1	1	1	1	1	1	1	1	1	1	1	1	1	1	1	1	1	1	1	1	1	1	1	1	1	1	1	1	1	1	1	1	1	1	1	1	1	1	1	1
		NA	NA	NA	NA	NA	NA	NA	NA	NA	NA	NA	NA	NA	NA	NA	NA	NA	NA	NA	NA	NA	NA	NA	NA	NA	NA	NA	NA	NA	NA	NA	NA	NA	NA	NA	NA	NA	NA	NA	NA	NA	NA	NA	NA	NA	NA	NA	NA
		4.93561e-39	1.33596e-68	1.07925e-96	2.95427e-149	3.91934e-39	1.96505e-64	8.34691e-94	3.31207e-148	9.34186e-41	2.40401e-70	6.3748e-98	1.24916e-139	1.72903e-38	2.12931e-66	1.742e-93	2.77562e-143	1.4247e-38	1.37491e-63	4.0157e-92	7.22799e-145	1.60242e-39	1.2891e-66	3.2904e-91	1.29729e-132	1.05733e-35	3.73539e-61	4.50448e-88	1.10911e-136	2.51332e-36	1.05803e-58	3.65285e-85	1.75832e-136	7.50444e-39	9.25516e-64	5.2923e-89	1.04006e-129	4.92732e-35	2.14276e-60	7.9896e-83	1.93657e-127	1.20234e-35	9.65065e-57	3.59239e-81	2.82e-125	4.98145e-35	5.77856e-59	1.05518e-84	6.8682e-125
		0.000494476	0.0014788	0.00806234	0.195248	4.03758e-05	0.000598929	0.0306812	0.0954541	0.000387554	0.0151802	0.0166308	0.0729274	0.000992622	0.00308542	0.0162862	0.191274	9.239e-05	0.00115075	0.0329514	0.066673	0.000965946	0.0178755	0.0252176	0.0305636	0.0026627	0.00548115	0.0211477	0.0971762	0.000799976	0.00382772	0.055191	0.0688054	0.00850761	0.0387932	0.03484	0.0404929	0.00860117	0.0218908	0.0201555	0.105623	0.00313867	0.0125885	0.0443896	0.0749697	0.00754049	0.0170984	0.0254942	0.0701264
		NA	NA	NA	NA	NA	NA	NA	NA	NA	NA	NA	NA	NA	NA	NA	NA	NA	NA	NA	NA	NA	NA	NA	NA	NA	NA	NA	NA	NA	NA	NA	NA	NA	NA	NA	NA	NA	NA	NA	NA	NA	NA	NA	NA	NA	NA	NA	NA
		NA	NA	NA	NA	NA	NA	NA	NA	NA	NA	NA	NA	NA	NA	NA	NA	NA	NA	NA	NA	NA	NA	NA	NA	NA	NA	NA	NA	NA	NA	NA	NA	NA	NA	NA	NA	NA	NA	NA	NA	NA	NA	NA	NA	NA	NA	NA	NA
		NA	NA	NA	NA	NA	NA	NA	NA	NA	NA	NA	NA	NA	NA	NA	NA	NA	NA	NA	NA	NA	NA	NA	NA	NA	NA	NA	NA	NA	NA	NA	NA	NA	NA	NA	NA	NA	NA	NA	NA	NA	NA	NA	NA	NA	NA	NA	NA
		NA	NA	NA	NA	NA	NA	NA	NA	NA	NA	NA	NA	NA	NA	NA	NA	NA	NA	NA	NA	NA	NA	NA	NA	NA	NA	NA	NA	NA	NA	NA	NA	NA	NA	NA	NA	NA	NA	NA	NA	NA	NA	NA	NA	NA	NA	NA	NA
		7.03949e-235	2.14617e-270	4.69813e-305	0	8.20531e-168	1.80266e-226	1.82753e-251	2.25389e-280	2.06892e-91	1.52891e-130	5.4888e-202	2.44378e-262	7.46221e-196	7.1957e-222	1.10471e-259	0	2.38477e-146	4.14202e-200	2.71637e-234	4.3796e-262	1.84255e-83	4.56801e-119	4.33274e-184	6.75407e-233	6.84663e-170	9.84192e-198	6.59032e-238	6.34591e-284	1.83141e-141	5.48741e-189	5.0471e-216	3.85753e-240	1.44825e-81	1.61419e-116	3.29645e-175	2.87438e-226	2.05836e-153	2.09694e-189	6.90495e-236	3.31138e-289	9.5394e-131	3.66422e-169	1.26101e-193	2.2826e-217	5.78904e-78	1.17979e-112	1.58692e-172	7.90615e-222
		0.0314095	0.00750688	0.0726799	0.0614967	0.326408	0.0597723	0.00267843	0.00667016	0.399906	0.15685	0.429088	0.31282	0.205508	0.0969708	0.459284	0.623308	0.300323	0.0724414	0.00104058	0.00164131	0.22479	0.0809572	0.11059	0.0641567	0.0896553	0.0247448	0.13122	0.105013	0.143943	0.0205301	0.000226077	0.000305656	0.0696064	0.022312	0.0279802	0.0125577	0.00123772	0.000430988	0.00250097	0.0547016	0.0508721	0.00373048	6.60365e-05	1.94012e-05	0.0171534	0.00399386	0.00274594	0.000656815
		NA	NA	NA	NA	NA	NA	NA	NA	NA	NA	NA	NA	NA	NA	NA	NA	NA	NA	NA	NA	NA	NA	NA	NA	NA	NA	NA	NA	NA	NA	NA	NA	NA	NA	NA	NA	NA	NA	NA	NA	NA	NA	NA	NA	NA	NA	NA	NA
		NA	NA	NA	NA	NA	NA	NA	NA	NA	NA	NA	NA	NA	NA	NA	NA	NA	NA	NA	NA	NA	NA	NA	NA	NA	NA	NA	NA	NA	NA	NA	NA	NA	NA	NA	NA	NA	NA	NA	NA	NA	NA	NA	NA	NA	NA	NA	NA
		NA	NA	NA	NA	NA	NA	NA	NA	NA	NA	NA	NA	NA	NA	NA	NA	NA	NA	NA	NA	NA	NA	NA	NA	NA	NA	NA	NA	NA	NA	NA	NA	NA	NA	NA	NA	NA	NA	NA	NA	NA	NA	NA	NA	NA	NA	NA	NA
		NA	NA	NA	NA	NA	NA	NA	NA	NA	NA	NA	NA	NA	NA	NA	NA	NA	NA	NA	NA	NA	NA	NA	NA	NA	NA	NA	NA	NA	NA	NA	NA	NA	NA	NA	NA	NA	NA	NA	NA	NA	NA	NA	NA	NA	NA	NA	NA
		0.993732	3.92516e-20	4.25925e-16	6.17737e-06	0.998269	0.998269	3.24477e-20	6.45468e-14	0.989151	0.989151	9.20485e-20	2.22076e-19	0.993732	2.67683e-20	3.90056e-15	7.55579e-06	0.998269	0.998269	2.08587e-21	2.66392e-13	0.989151	0.989151	3.10588e-19	1.07983e-18	0.993732	5.50447e-21	4.89775e-15	5.79561e-06	0.998269	0.998269	9.98817e-22	2.56425e-14	0.989151	0.989151	2.87236e-19	8.39795e-19	0.993732	1.03969e-21	2.06908e-14	5.19529e-06	0.998269	0.998269	6.75964e-22	2.88695e-14	0.989151	0.989151	2.73086e-19	4.44601e-19
		1	0.375861	0.896787	0.207699	1	1	0.313335	0.355936	1	1	0.106333	0.464777	1	0.361448	0.83133	0.314792	1	1	0.578087	0.997992	1	1	0.205913	0.821426	1	0.499927	0.579204	0.58916	1	1	0.725945	0.844899	1	1	0.333769	0.913804	1	0.651667	0.528444	0.962291	1	1	0.841607	0.5975	1	1	0.512507	0.98457
		NA	NA	NA	NA	NA	NA	NA	NA	NA	NA	NA	NA	NA	NA	NA	NA	NA	NA	NA	NA	NA	NA	NA	NA	NA	NA	NA	NA	NA	NA	NA	NA	NA	NA	NA	NA	NA	NA	NA	NA	NA	NA	NA	NA	NA	NA	NA	NA
		5.12121e-217	3.02667e-242	1.93838e-259	0	0	0	0	0	1.07499e-140	1.69971e-178	4.09736e-197	2.95952e-216	1.32439e-180	1.26239e-208	3.65577e-236	8.70779e-297	2.74964e-271	1.30712e-221	9.8192e-290	0	4.65677e-129	2.85722e-161	4.83616e-188	6.87003e-203	4.10142e-202	7.06128e-211	4.22248e-248	0	2.84868e-203	6.83477e-252	3.46531e-283	0	1.82751e-123	3.5767e-161	4.04742e-201	4.21839e-224	2.13243e-213	5.48827e-240	1.10748e-273	0	1.6598e-260	5.58663e-302	0	0	2.71028e-119	1.28041e-154	5.25973e-193	4.61853e-208
		0.203194	0.041212	0.0409814	0.00353074	0.240432	0.810287	0.074753	0.389943	0.542525	0.929821	0.316053	0.222955	0.027632	0.00118785	0.000164071	0.00199785	0.0135135	0.964487	0.24427	0.0995642	0.0294662	0.0366949	0.0895414	0.158156	0.000691946	8.32416e-05	2.09988e-06	6.78126e-06	0.878029	0.520773	0.339977	0.135352	0.0030615	0.00492693	0.162433	0.37586	1.01267e-06	2.2111e-11	1.99744e-13	2.26606e-19	4.62589e-05	1.47586e-05	1.40301e-06	2.02982e-06	0.00122537	0.00333369	0.0427237	0.0635311
		NA	NA	NA	NA	NA	NA	NA	NA	NA	NA	NA	NA	NA	NA	NA	NA	NA	NA	NA	NA	NA	NA	NA	NA	NA	NA	NA	NA	NA	NA	NA	NA	NA	NA	NA	NA	NA	NA	NA	NA	NA	NA	NA	NA	NA	NA	NA	NA
		0.998922	0.998922	0.998922	0.998922	0.991848	0.991848	0.991848	0.991848	0.991719	0.991719	0.991719	0.991719	0.998922	0.998922	0.998922	0.998922	0.991848	0.991848	0.991848	0.991848	0.991719	0.991719	0.991719	0.991719	0.998922	0.998922	0.998922	0.998922	0.991848	0.991848	0.991848	0.991848	0.991719	0.991719	0.991719	0.991719	0.998922	0.998922	0.998922	0.998922	0.991848	0.991848	0.991848	0.991848	0.991719	0.991719	0.991719	0.991719
		1	1	1	1	1	1	1	1	1	1	1	1	1	1	1	1	1	1	1	1	1	1	1	1	1	1	1	1	1	1	1	1	1	1	1	1	1	1	1	1	1	1	1	1	1	1	1	1
		NA	NA	NA	NA	NA	NA	NA	NA	NA	NA	NA	NA	NA	NA	NA	NA	NA	NA	NA	NA	NA	NA	NA	NA	NA	NA	NA	NA	NA	NA	NA	NA	NA	NA	NA	NA	NA	NA	NA	NA	NA	NA	NA	NA	NA	NA	NA	NA
		0.998798	0.998798	0.998798	0.998798	0.994539	0.994539	0.995784	0.995784	0.998785	0.998785	0.992042	0.992042	0.998798	0.998798	0.998798	0.998798	0.994539	0.994539	0.995784	0.995784	0.998785	0.998785	0.992042	0.992042	0.998798	0.998798	0.998798	0.998798	0.994539	0.994539	0.995784	0.995784	0.998785	0.998785	0.992042	0.992042	0.998798	0.998798	0.998798	0.998798	0.994539	0.994539	0.995784	0.995784	0.998785	0.998785	0.992042	0.992042
		1	1	1	1	1	1	1	1	1	1	1	1	1	1	1	1	1	1	1	1	1	1	1	1	1	1	1	1	1	1	1	1	1	1	1	1	1	1	1	1	1	1	1	1	1	1	1	1
		NA	NA	NA	NA	NA	NA	NA	NA	NA	NA	NA	NA	NA	NA	NA	NA	NA	NA	NA	NA	NA	NA	NA	NA	NA	NA	NA	NA	NA	NA	NA	NA	NA	NA	NA	NA	NA	NA	NA	NA	NA	NA	NA	NA	NA	NA	NA	NA
		NA	NA	NA	NA	0	NA	NA	NA	0	0	0	0	NA	NA	NA	NA	0	NA	NA	NA	0	0	0	0	NA	NA	NA	NA	0	NA	NA	NA	0	0	0	0	NA	NA	NA	NA	0	NA	NA	NA	0	0	0	0
		NA	NA	NA	NA	0.979854	NA	NA	NA	0.982316	0.980591	0.980891	0.980225	NA	NA	NA	NA	0.97752	NA	NA	NA	0.0545271	0.0330663	0.0284863	0.977615	NA	NA	NA	NA	0.973744	NA	NA	NA	0.0277668	0.0194455	0.0162901	0.973693	NA	NA	NA	NA	0.970718	NA	NA	NA	0.0227135	0.0164858	0.0114578	0.971562
		NA	NA	NA	NA	NA	NA	NA	NA	NA	NA	NA	NA	NA	NA	NA	NA	NA	NA	NA	NA	NA	NA	NA	NA	NA	NA	NA	NA	NA	NA	NA	NA	NA	NA	NA	NA	NA	NA	NA	NA	NA	NA	NA	NA	NA	NA	NA	NA
		0.00132622	7.8068e-08	2.13738e-15	5.17978e-35	0.15859	5.64275e-07	1.76114e-12	5.52572e-29	0.0774809	1.13545e-07	1.30374e-12	1.9091e-29	0.0014288	4.01446e-09	3.30591e-17	3.02033e-38	0.117966	1.49947e-07	6.615e-14	3.26833e-33	0.0834862	6.1249e-08	6.30642e-14	8.27604e-33	0.00163815	5.03453e-09	9.5333e-17	1.08094e-37	0.161567	1.68968e-07	3.06268e-13	3.07889e-32	0.0554304	6.80335e-08	9.13289e-14	1.02159e-32	0.00148521	8.18492e-09	4.08013e-16	2.36083e-36	0.15554	3.09894e-07	4.95774e-13	1.69924e-32	0.0799105	9.69628e-08	1.47462e-13	6.32292e-32
		4.35088e-05	0.000124772	0.000171244	0.000272063	5.26014e-05	1.46156e-05	7.82433e-05	0.00149518	4.1131e-05	1.29696e-05	0.000165309	0.00344283	3.96081e-05	2.38263e-05	5.22607e-05	6.15768e-05	4.52864e-05	1.1832e-05	3.06133e-05	0.000200474	4.36945e-05	1.19346e-05	4.56093e-05	0.000571335	4.55093e-05	2.77055e-05	5.44962e-05	5.35111e-05	5.30003e-05	1.27946e-05	4.53128e-05	0.000146563	3.49509e-05	1.20021e-05	5.63679e-05	0.000349229	4.39435e-05	3.8499e-05	4.2899e-05	4.96046e-05	5.08305e-05	1.28092e-05	5.98293e-05	0.00011727	4.08156e-05	1.39354e-05	4.56277e-05	0.000390909
		NA	NA	NA	NA	NA	NA	NA	NA	NA	NA	NA	NA	NA	NA	NA	NA	NA	NA	NA	NA	NA	NA	NA	NA	NA	NA	NA	NA	NA	NA	NA	NA	NA	NA	NA	NA	NA	NA	NA	NA	NA	NA	NA	NA	NA	NA	NA	NA
		1.90996e-17	8.30323e-41	2.49519e-112	9.59222e-183	8.47766e-22	3.85775e-47	1.99963e-64	5.78046e-118	1.58808e-32	2.42318e-58	2.86117e-84	6.54968e-98	6.87163e-18	2.41908e-38	1.92876e-111	1.79198e-192	4.05097e-22	5.40806e-42	5.67544e-58	3.43128e-116	1.02021e-36	1.95176e-57	1.66691e-81	3.31565e-97	2.92425e-29	1.5417e-65	1.45027e-148	1.54637e-250	6.16196e-31	3.77674e-63	2.39094e-73	7.00675e-133	6.80593e-39	1.30866e-53	3.3693e-81	1.2939e-89	4.8776e-58	1.15474e-149	4.36326e-272	0	5.5566e-58	9.53653e-108	3.1546e-138	1.33947e-228	2.55942e-41	1.52852e-62	2.50068e-93	4.18825e-114
		0.000147406	0.213498	0.291467	0.389671	0.273184	0.109024	0.242824	0.305695	0.111761	0.25377	0.244091	0.539092	0.000175466	0.071398	0.147702	0.838174	0.0776499	0.0729214	0.107116	0.187171	0.00904462	0.0423627	0.050994	0.0930797	5.64721e-07	1.41639e-05	0.00118907	0.670063	0.00126071	0.000561006	0.00556693	0.0523509	0.00134547	0.0139202	0.00500948	0.0707747	1.59006e-09	8.60671e-14	1.26739e-09	3.83864e-07	1.51817e-07	5.04337e-08	1.73216e-07	2.58069e-07	0.00157373	0.0117694	0.00154268	0.0218288
		NA	NA	NA	NA	NA	NA	NA	NA	NA	NA	NA	NA	NA	NA	NA	NA	NA	NA	NA	NA	NA	NA	NA	NA	NA	NA	NA	NA	NA	NA	NA	NA	NA	NA	NA	NA	NA	NA	NA	NA	NA	NA	NA	NA	NA	NA	NA	NA
		0.99841	0.99841	0.99841	0.99841	0.997269	0.997269	0.997269	0.997269	0.997685	0.997685	0.997685	0.997685	0.99841	0.99841	0.99841	0.99841	0.997269	0.997269	0.997269	0.997269	0.997685	0.997685	0.997685	0.997685	0.99841	0.99841	0.99841	0.99841	0.997269	0.997269	0.997269	0.997269	0.997685	0.997685	0.997685	0.997685	0.99841	0.99841	0.99841	0.99841	0.997269	0.997269	0.997269	0.997269	0.997685	0.997685	0.997685	0.997685
		1	1	1	1	1	1	1	1	1	1	1	1	1	1	1	1	1	1	1	1	1	1	1	1	1	1	1	1	1	1	1	1	1	1	1	1	1	1	1	1	1	1	1	1	1	1	1	1
		NA	NA	NA	NA	NA	NA	NA	NA	NA	NA	NA	NA	NA	NA	NA	NA	NA	NA	NA	NA	NA	NA	NA	NA	NA	NA	NA	NA	NA	NA	NA	NA	NA	NA	NA	NA	NA	NA	NA	NA	NA	NA	NA	NA	NA	NA	NA	NA
		0	0	0	0	0	0	0	0	0	0	0	0	0	0	0	0	0	0	0	0	0	0	0	0	0	0	0	0	0	0	0	0	0	0	0	0	0	0	0	0	0	0	0	0	0	0	0	0
		4.85291e-05	5.36532e-05	1.85259e-05	1.80162e-05	1.20047e-06	6.9535e-07	8.68269e-06	0.000922842	2.21066e-06	6.67091e-06	6.65121e-05	0.00251925	3.85498e-07	3.5012e-11	2.26377e-11	4.0308e-09	3.24026e-07	6.56924e-16	1.25806e-13	4.94458e-19	6.56379e-15	2.04623e-24	4.14944e-27	1.7477e-23	1.07295e-10	5.80655e-12	3.08865e-15	6.95688e-17	2.68551e-10	1.81134e-34	2.06383e-35	2.79868e-52	8.81008e-33	2.19131e-34	3.0052e-33	8.15897e-40	3.3068e-07	7.11614e-08	1.68544e-08	1.57538e-08	2.12362e-06	2.59199e-09	1.93213e-05	0.00593016	2.40651e-07	6.77583e-06	0.00449113	0.00158794
		NA	NA	NA	NA	NA	NA	NA	NA	NA	NA	NA	NA	NA	NA	NA	NA	NA	NA	NA	NA	NA	NA	NA	NA	NA	NA	NA	NA	NA	NA	NA	NA	NA	NA	NA	NA	NA	NA	NA	NA	NA	NA	NA	NA	NA	NA	NA	NA
		1.04809e-242	8.62535e-283	0	0	5.09129e-218	6.67537e-252	1.02135e-266	0	1.15482e-230	8.80481e-253	7.36446e-263	1.28132e-294	4.38656e-225	2.96328e-247	3.98105e-257	2.35654e-267	3.90559e-217	2.32618e-221	2.81879e-214	3.29338e-234	9.1867e-223	3.40768e-235	2.01807e-232	4.55669e-238	3.58539e-210	4.14524e-243	2.33588e-236	1.58846e-282	1.18903e-204	8.72689e-202	4.16388e-218	1.07246e-252	2.24418e-198	1.67196e-220	1.85851e-251	1.06574e-301	5.33043e-226	3.05515e-243	2.02508e-254	3.14917e-282	1.85896e-219	1.51067e-222	3.28543e-248	5.36482e-266	1.08756e-212	2.0926e-228	8.11727e-270	2.24797e-279
		4.2084e-21	4.2579e-19	2.85547e-16	1.44744e-12	2.84072e-21	3.70361e-21	6.09789e-24	5.85702e-16	2.06841e-20	1.06246e-21	5.7403e-22	6.39362e-19	2.13543e-38	3.63573e-42	3.61317e-48	1.62305e-51	1.24555e-41	7.37533e-52	1.32409e-61	5.34803e-65	4.20038e-37	3.47597e-41	8.84115e-51	2.43607e-56	9.86019e-47	2.23122e-49	2.29438e-61	3.0854e-53	3.87251e-53	1.41301e-70	1.50559e-70	4.47228e-66	2.37223e-47	1.90063e-50	1.47448e-49	6.9853e-45	5.39773e-33	1.12582e-37	8.05157e-45	8.19926e-41	2.06567e-34	7.48593e-47	2.99255e-41	7.84652e-48	5.00797e-30	7.244e-34	2.21688e-28	1.13093e-31
		NA	NA	NA	NA	NA	NA	NA	NA	NA	NA	NA	NA	NA	NA	NA	NA	NA	NA	NA	NA	NA	NA	NA	NA	NA	NA	NA	NA	NA	NA	NA	NA	NA	NA	NA	NA	NA	NA	NA	NA	NA	NA	NA	NA	NA	NA	NA	NA
		0	0	0	0	0	0	0	0	0	0	0	0	0	0	0	0	0	0	0	0	0	0	0	0	0	0	0	0	0	0	0	0	0	0	0	0	0	0	0	0	0	0	0	0	0	0	0	0
		0.707408	0.854896	0.318381	0.095228	0.0808044	0.157144	0.00768384	4.94132e-07	0.0130972	0.526761	0.00504519	3.27511e-06	0.295511	0.182949	0.165896	0.231802	0.336156	0.534454	0.397131	0.0211447	0.00122633	0.243779	0.921607	0.0338817	0.128495	0.0782617	0.00298733	0.00024937	0.475037	0.821971	0.571194	0.879607	0.00200397	0.23609	0.580825	0.280296	0.00188039	0.000559977	3.60267e-05	1.15118e-05	0.575524	0.510458	0.0730717	0.0637569	0.020879	0.801449	0.742592	0.209299
		NA	NA	NA	NA	NA	NA	NA	NA	NA	NA	NA	NA	NA	NA	NA	NA	NA	NA	NA	NA	NA	NA	NA	NA	NA	NA	NA	NA	NA	NA	NA	NA	NA	NA	NA	NA	NA	NA	NA	NA	NA	NA	NA	NA	NA	NA	NA	NA
		1.34038e-298	0	1.43833e-287	0	4.79266e-291	1.40417e-289	7.37684e-306	0	9.90075e-280	0	0	9.20372e-300	0	0	0	0	0	3.26006e-295	6.23169e-295	0	3.27332e-284	0	0	0	0	2.5457e-283	0	0	2.28992e-306	2.12971e-302	0	0	2.36033e-291	0	0	0	1.52818e-262	4.7475e-286	0	0	3.68249e-297	0	0	0	4.37654e-284	0	0	0
		0.884738	0.544599	3.93348e-09	1.13381e-22	0.0554767	0.000223622	9.41822e-10	2.56848e-14	0.295627	0.0664451	0.172944	8.47436e-08	0.869993	0.401091	1.97187e-08	1.71351e-17	0.0502998	0.000140911	3.16686e-12	1.96501e-11	0.15627	0.0467501	0.0952044	3.46047e-05	0.0192546	0.244986	0.00659916	3.3497e-11	0.0123282	0.00187949	1.46247e-08	8.67281e-08	0.0979763	0.022952	0.0236332	0.000432577	0.00641918	0.72957	0.248718	0.000451066	0.000393482	0.511856	0.00518129	0.000906755	0.055218	0.0304092	0.0673068	4.71275e-05
		NA	NA	NA	NA	NA	NA	NA	NA	NA	NA	NA	NA	NA	NA	NA	NA	NA	NA	NA	NA	NA	NA	NA	NA	NA	NA	NA	NA	NA	NA	NA	NA	NA	NA	NA	NA	NA	NA	NA	NA	NA	NA	NA	NA	NA	NA	NA	NA
		0	0	0	0	0	0	0	0	0	0	0	0	0	0	0	0	0	0	0	0	1.23627e-299	0	0	0	0	0	0	0	0	0	0	0	0	0	0	0	0	0	0	0	0	0	0	0	0	0	0	0
		0.462204	0.793399	0.0855321	0.0110893	0.746492	0.32076	0.0134489	2.02479e-05	0.806816	0.547407	0.928878	0.740872	0.421007	0.0358464	0.238692	0.974227	0.321918	0.02754	0.00777033	0.000187226	0.0403665	0.148957	0.0187497	0.00103555	0.0021162	0.00701202	0.00289054	2.51328e-09	0.904377	0.237706	0.963428	0.796009	0.108432	0.17374	0.0386999	0.0504243	3.0815e-05	0.000343007	9.11426e-05	5.95374e-12	0.487931	0.45933	0.533611	0.146749	0.0171959	0.019981	0.0114734	0.00543944
		NA	NA	NA	NA	NA	NA	NA	NA	NA	NA	NA	NA	NA	NA	NA	NA	NA	NA	NA	NA	NA	NA	NA	NA	NA	NA	NA	NA	NA	NA	NA	NA	NA	NA	NA	NA	NA	NA	NA	NA	NA	NA	NA	NA	NA	NA	NA	NA
		0	0	0	0	0	0	0	0	0	0	0	0	0	0	0	0	0	0	0	0	0	0	0	0	0	0	0	0	0	0	0	0	4.92632e-273	2.04579e-294	0	0	0	0	0	0	0	0	0	0	8.31122e-269	8.93635e-274	0	0
		1.28041e-19	1.1951e-23	2.65309e-31	6.37722e-29	1.41705e-22	1.21384e-26	8.21908e-27	1.84037e-30	3.94632e-25	5.32614e-28	7.30365e-30	2.03591e-24	5.27067e-40	3.23003e-33	1.41847e-34	1.31207e-38	2.22988e-43	1.74396e-40	1.01602e-42	8.24323e-44	5.72695e-38	2.82824e-37	3.34965e-31	2.03727e-28	2.23272e-53	2.62351e-37	3.15859e-29	2.64206e-19	1.99908e-47	1.38746e-59	5.35407e-55	8.10083e-50	2.70236e-57	3.74251e-57	4.68313e-57	1.12156e-53	7.93341e-34	3.75484e-27	6.98754e-20	7.08359e-15	2.21443e-35	1.68042e-44	1.49627e-33	5.48901e-30	8.68268e-48	1.77349e-49	3.77372e-53	6.70654e-47
		NA	NA	NA	NA	NA	NA	NA	NA	NA	NA	NA	NA	NA	NA	NA	NA	NA	NA	NA	NA	NA	NA	NA	NA	NA	NA	NA	NA	NA	NA	NA	NA	NA	NA	NA	NA	NA	NA	NA	NA	NA	NA	NA	NA	NA	NA	NA	NA
		3.57388e-177	9.54963e-178	1.51557e-203	4.27017e-255	2.13569e-194	4.95224e-211	5.0892e-256	0	4.43786e-196	5.26722e-226	4.88259e-232	1.24739e-281	1.20409e-254	2.03936e-278	0	0	2.58771e-226	9.50912e-262	0	1.37692e-178	3.42711e-154	9.4574e-184	4.60785e-214	3.46081e-271	7.22818e-211	9.23732e-258	0	6.49943e-202	8.31814e-196	1.59269e-252	5.58919e-169	8.28589e-214	1.51392e-184	2.83679e-230	3.75332e-267	0	4.85191e-289	0	0	0	3.59518e-262	0	0	0	7.30448e-194	1.36004e-238	2.06478e-250	2.27341e-290
		0.0360186	0.226107	0.523267	0.040403	0.143529	0.192841	0.518659	0.768363	0.360818	0.000643805	1.55467e-15	5.30292e-20	0.0209794	0.0527526	0.242218	0.242625	6.84238e-05	2.74222e-05	0.162258	2.94029e-12	0.188204	0.00357037	0.0077145	0.196805	0.36172	0.467062	0.71455	1.34956e-06	0.0416203	0.030649	6.80294e-09	4.90486e-10	0.531355	0.495144	0.231224	0.00976683	1.23968e-06	4.97512e-05	0.000423138	0.495928	1.77828e-08	4.26319e-12	1.0959e-14	8.25551e-16	0.0012195	0.0448288	0.0521527	0.0487012
		NA	NA	NA	NA	NA	NA	NA	NA	NA	NA	NA	NA	NA	NA	NA	NA	NA	NA	NA	NA	NA	NA	NA	NA	NA	NA	NA	NA	NA	NA	NA	NA	NA	NA	NA	NA	NA	NA	NA	NA	NA	NA	NA	NA	NA	NA	NA	NA
Aal	inters	2.36773	2.28404	2.30339	2.2543	2.36638	2.35794	2.35513	2.32164	2.32072	2.27361	2.25153	2.21206	2.24584	2.23618	2.24196	2.22176	2.3113	2.27394	2.26422	2.25947	2.17253	2.10906	2.16855	2.18645	2.22524	2.23982	2.20709	2.21114	2.28469	2.24226	2.26196	2.25442	2.11228	2.09719	2.10522	2.1228	2.32662	2.36604	2.33974	2.34879	2.37145	2.40149	2.40337	2.37415	2.12239	2.18973	2.20551	2.18721
	incidence	0.921993	0.943155	0.938475	0.9501	0.939678	0.941638	0.942284	0.949812	0.938043	0.949191	0.954159	0.962627	0.944253	0.946585	0.945192	0.950003	0.94829	0.956454	0.954964	0.955992	0.953718	0.967933	0.961766	0.961303	0.952968	0.949621	0.957033	0.956135	0.950442	0.959662	0.958978	0.957079	0.960522	0.967257	0.968745	0.968227	0.923711	0.917527	0.920083	0.917572	0.915527	0.917039	0.916525	0.924378	0.933908	0.932664	0.933241	0.933775
	loglik
Gpy	inters	1.56834	1.91633	2.30504	2.68627	1.69911	2.04465	2.50557	2.9947	1.45233	1.82224	2.32643	2.89672	1.61061	1.98117	2.35272	2.80188	1.74771	2.15666	2.53078	3.12429	1.52271	1.94321	2.52601	3.13947	1.61773	1.99325	2.47969	2.94028	1.76034	2.16513	2.62255	3.35699	1.55585	2.01403	2.64472	3.38916	1.6107	2.00162	2.46471	2.96984	1.73102	2.14378	2.58192	3.29204	1.55591	1.98473	2.61728	3.3419
	incidence	0.807088	0.861701	0.812425	0.850297	0.788674	0.851081	0.763349	0.83748	0.80653	0.881892	0.867162	0.859764	0.772491	0.804181	0.789064	0.823089	0.706202	0.733137	0.728887	0.745639	0.71659	0.763163	0.729331	0.793318	0.744977	0.775495	0.734959	0.768361	0.66811	0.704423	0.695385	0.691417	0.663115	0.673938	0.669877	0.670319	0.755205	0.75106	0.749153	0.746082	0.694449	0.713218	0.717776	0.702346	0.663015	0.692745	0.676836	0.684059
	loglik
Lti	inters
	incidence
	loglik
Sci	inters
	incidence
	loglik
Pvo	inters	3.0125	2.98195	2.94216	2.9725	1.18568	1.1997	1.21879	1.2328					2.94011	2.9103	2.87098	2.90059	1.19212	1.20613	1.21836	1.23935					2.83981	2.81113	2.76344	2.80151	1.21269	1.21269	1.22493	1.2459					2.87768	2.86788	2.83843	2.87833	1.23302	1.23302	1.24532	1.2594
	incidence					1.08218	1.08149	1.08056	1.07988									1.08227	1.08159	1.08089	1.07988					1.0376	1.03801	1.03897	1.03821	1.08157	1.08157	1.08088	1.07987					1.04287	1.04306	1.04363	1.04278	1.081	1.081	1.08031	1.07954
	loglik
Cfi	inters		0.053779	0.21659	0.48726		0.00592628	0.219006	0.449634			0.157393	0.504034		0.0478534	0.215845	0.48903		0.00592628	0.232506	0.460346			0.130645	0.449105		0.0422173	0.236087	0.490154		0.00592628	0.247357	0.474434			0.126993	0.441326		0.0360925	0.25771	0.534842		0.00592628	0.257147	0.494111			0.12725	0.428274
	incidence												0.65326																												0.187468
	loglik
Ccr	inters
	incidence
	loglik
Mca	inters	3.3748	4.24421	5.66052	6.64353	3.36619	4.43269	5.52945	6.75276	3.29515	4.0781	5.11349	5.86795	2.97462	3.72923	4.78459	5.56973	3.05177	3.96786	4.80139	5.71553	2.9948	3.59647	4.40074	5.15994	2.95734	3.68914	4.67049	5.50242	2.97766	3.85569	4.62333	5.5126	2.96766	3.51197	4.33152	4.92062	2.90451	3.6322	4.64756	5.3184	2.84482	3.72638	4.46118	5.32717	2.81885	3.38696	4.1267	4.69958
	incidence	0.934862	0.93866	0.922667		0.936784	0.949137	0.93183	0.953841	0.951284				0.937418	0.936334	0.933379		0.933592	0.942133	0.948878		0.94665				0.94421	0.932272	0.942813		0.938265	0.947359			0.949932				0.949097	0.941094	0.936793
	loglik
Mav	inters
	incidence
	loglik
Dni	inters	1.38449	1.74766	2.3728	3.31796	1.36694	1.71033	2.13963	3.02411	1.50241	1.98978	2.53224	3.46712	1.41436	1.87775	2.57669	3.71191	1.4022	1.77354	2.40525	3.43356	1.55242	2.11804	2.71785	3.7416	1.44733	1.98369	2.71967	3.90917	1.45285	1.83791	2.51982	3.5995	1.60667	2.21139	2.8069	3.78885	1.48427	2.07199	2.86128	3.92154	1.4872	1.87971	2.61702	3.6659	1.62544	2.2402	2.83124	3.8261
	incidence																												0.952455											0.955113	0.942608			0.949262	0.950065				0.964158
	loglik
Sbe	inters
	incidence
	loglik
Hcr	inters	2.17641	2.71766	3.19088	4.15634	2.16745	2.64255	3.17097	4.11785	2.2057	2.76321	3.21091	3.95738	2.16916	2.68813	3.15441	4.07593	2.15969	2.63235	3.14701	4.06165	2.18573	2.70422	3.11726	3.84759	2.12084	2.60052	3.06344	3.93169	2.1232	2.55572	3.04005	3.91676	2.18501	2.66322	3.0788	3.79163	2.11038	2.59287	2.96945	3.76536	2.11275	2.52451	2.96443	3.71812	2.10859	2.56768	2.99975	3.71464
	incidence	1.01462	1.01286	1.01059		1.01661	1.01373	1.00906		1.01495	1.01043	1.00976		1.01407	1.01226	1.00985		1.01609	1.01322	1.00899		1.01425	1.01032	1.00935	1.00843	1.01328	1.01182	1.00964		1.01455	1.01225			1.0121	1.00932	1.00896	1.00811	1.01205	1.01022	1.00981		1.01332	1.01101	1.00876		1.0124	1.01057	1.00947
	loglik
Cau	inters
	incidence
	loglik
Clu	inters	5.4348	6.18604	6.90969	8.62394	4.28245	5.3473	5.94557	6.62664	3.06183	3.69921	4.84227	5.80334	4.84635	5.3639	6.07196	7.37918	3.94909	4.87486	5.57868	6.21169	2.94489	3.53895	4.62541	5.46709	4.54879	5.09319	5.80331	6.8675	3.92764	4.83171	5.39091	5.92775	2.95425	3.56288	4.58108	5.48803	4.46265	5.23733	6.33035	7.8949	3.84473	4.63744	5.13521	5.66994	2.957	3.58534	4.58659	5.48026
	incidence	0.867094	0.817354					0.90078	0.913412											0.871995	0.874883						0.832911				0.926914	0.828187	0.829159		0.931623	0.934383	0.918731	0.666168	0.578055	0.587409			0.878112	0.778879	0.742408	0.90409	0.880277	0.878374	0.851568
	loglik
Ala	inters
	incidence
	loglik
Uar	inters		0.101079	0.340064	0.638993			0.147711	0.403155			0.0556058	0.258093		0.107315	0.366409	0.642196			0.141123	0.417592			0.0514303	0.278617		0.105269	0.365162	0.636379			0.138893	0.385429			0.0523415	0.273983		0.107573	0.38336	0.632758			0.148874	0.383752			0.0533045	0.263497
	incidence
	loglik
Mlu	inters	6.03073	7.0502	7.3058	8.75398	7.94382	8.7849	9.98304	10.2717	4.2018	4.85738	5.18201	5.89433	5.38964	6.33924	7.07739	8.34248	7.54287	7.99766	8.9731	10.0967	4.0178	4.5497	4.92373	5.28503	6.02257	6.5826	7.67617	9.35777	6.90326	8.18699	9.06193	10.8662	4.00889	4.61145	5.0624	5.46643	6.24163	7.22793	7.94398	10.6194	7.26309	8.00185	9.09857	10.5844	3.94632	4.53702	5.03487	5.43279
	incidence		0.961947	0.962281	0.947931									0.951257	0.922829	0.906763	0.925112	0.949717				0.96249	0.967375			0.9107	0.880388	0.844235	0.861426					0.940643	0.949792			0.86886	0.771162	0.727702	0.612033	0.904298	0.900675	0.889351	0.884421	0.930481	0.941522	0.962723
	loglik
Mpu	inters
	incidence
	loglik
Mma	inters
	incidence
	loglik
Ggu	inters					9.97251				7.74665	9.27413	8.99889	9.61474					12.3666				9.6404	11.3029	11.9354	12.2666					16.9048				12.4137	13.6538	14.5	17					21.1176				12.9285	14.44	16.2727	19.8889
	incidence																						0.0254882	0.0230168										0.115459	0.0178904	0.0159848										0.106997	0.0161095	0.0128789
	loglik
Llu	inters	1.27689	1.46058	1.69753	2.11244		1.43623	1.61871	1.99594		1.46255	1.62131	1.9974	1.27542	1.51084	1.74965	2.17872		1.45876	1.6638	2.08814		1.47203	1.66324	2.07258	1.27171	1.50706	1.73701	2.1678		1.4566	1.64304	2.06979		1.47048	1.65811	2.07173	1.27417	1.4989	1.71994	2.14102		1.44734	1.63616	2.07563		1.46453	1.65218	2.05495
	incidence	0.624914	0.697709	0.71892	0.748128	0.626237	0.624658	0.685047	0.778349	0.625355	0.625802	0.705604	0.792782	0.619497	0.638552	0.685255	0.708318	0.624168	0.622498	0.657918	0.721014	0.627247	0.625321	0.665634	0.73588	0.62515	0.644379	0.684431	0.702081	0.62625	0.625416	0.668842	0.707379	0.622532	0.625001	0.672604	0.717604	0.624338	0.656906	0.672152	0.695563	0.62475	0.622012	0.678229	0.700237	0.62437	0.630112	0.663362	0.719639
	loglik
Fsi	inters	2.17051	2.77669	4.45735	5.92389	2.1198	2.84874	3.17673	4.21603	2.64186	3.397	4.00307	4.29378	2.17351	2.718	4.40476	6.08166	2.19082	2.74369	3.08331	4.18788	2.83538	3.42491	4.01309	4.41274	2.64007	3.64658	5.33216	7.15885	2.55607	3.46202	3.66	4.73098	2.92868	3.35163	4.1022	4.3551	3.58812	6.28921	9.41263	13.4478	3.51875	4.7862	5.57601	7.87265	3.00732	3.64323	4.47281	5.13248
	incidence	0.865844												0.869955								0.928719	0.951188			0.743413	0.830097	0.907358		0.895767	0.881586	0.901938		0.882543	0.913624	0.872144		0.55951	0.338314	0.418348	0.494635	0.737067	0.722805	0.689491	0.650203	0.890622	0.917418	0.844795	0.883119
	loglik
Lly	inters
	incidence
	loglik
Lpa	inters	17.1657	18.1056	19.1641	20.8566	17.0239	18.5106	20.6808	22.7687	16.1087	18.0351	19.6889	18.9594	24.7154	28.8962	30.0618	35.8321	26.9033	38.6728	45.2282	56.1671	22.5336	33.5421	35.9363	36.0199	41.0948	57.7859	75.921	81.677	31.0976	58.502	90.2009	186.78	40.8015	62.7736	87.5723	112.813	33.6475	36.0041	39.0236	39.0794	20.7788	22.9004	26.136	26.3008	18.8201	21.0878	21.829	23.9948
	incidence	0.859583	0.808121	0.829236	0.8012	0.86351	0.818543	0.828164	0.800179	0.742084	0.712758	0.594125	0.782676	0.484906	0.335009	0.33523	0.357234	0.512734	0.214009	0.189122	0.124384	0.214472	0.102677	0.0827664	0.0905464	0.473005	0.390917	0.29775	0.179538	0.776364	0.0996415	0.0215225	0.0178337	0.0495745	0.027617	0.00709684	0.0015061	0.724543	0.690201	0.674285	0.670281	0.942063	0.894809	0.922916	0.954001	0.851234	0.868522	0.913445	0.902564
	loglik
Hic	inters	5.80628	6.68858	7.64512	8.55268	5.29089	5.98239	6.29621	7.90489	5.48042	5.98215	6.23023	7.00959	5.65414	6.33385	6.88359	7.49852	5.46998	5.78715	5.76895	6.66257	5.54841	5.93302	6.06876	6.47154	5.50854	6.5032	6.7872	8.75344	5.37812	5.64238	6.36086	8.07056	5.17998	5.83813	6.89136	8.96464	5.70322	6.26906	6.88349	8.00299	5.49215	5.77571	6.48237	7.42096	5.29403	5.71762	6.74664	7.28234
	incidence	1.03299	1.03058	1.02768	1.02416	1.03389	1.03272	1.0337	1.02728	1.03303	1.03298	1.03279	1.03011	1.04093	1.04122	1.0425	1.04291	1.0423	1.04502	1.04769	1.0475	1.04058	1.04141	1.04425	1.04539	1.04414	1.04343	1.04663	1.04267	1.04611	1.05023	1.04945	1.0468	1.04483	1.04469	1.04309	1.03976	1.03897	1.03994	1.04169	1.03934	1.03976	1.04362	1.04089	1.04201	1.03831	1.03919	1.03547	1.03641
	loglik
Gge	inters	10.3406	10.9091	11.4032	12.7566	9.49109	10.1386	10.5593	11.1345	9.10443	9.48641	10.3109	10.9495	10.4207	10.9324	11.6915	13.1225	9.44369	10.0825	10.6917	11.4118	8.99825	9.50831	10.3951	11.4472	9.02993	9.23935	10.6564	12.6209	8.51023	8.96482	9.71994	10.388	8.38569	8.84924	9.53922	10.218	9.22927	9.50465	10.5289	12.5042	7.98472	8.57571	9.41697	10.1574	7.38464	7.53378	8.42082	9.23642
	incidence							1.02166	1.03599	0.980923		1.02279	1.03407								1.01884	0.972893			1.01752			0.959018	0.943692					0.973342				0.949227	0.938666	0.910689	0.836523					0.980888
	loglik
Rru	inters	7.10798	9.77842	9.90677	11.1001	7.64152	9.23779	9.77845	10.2447	7.0792	8.85632	11.0639	10.3605	7.38251	10.4445	10.6201	12.3295	8.10315	9.40585	9.49525	11.1065	7.27704	9.05974	11.4208	11.6639	8.23117	9.5152	11.2591	11.7123	8.05564	9.28466	9.72273	11.4156	7.44254	9.3307	12.202	12.0321	7.9006	9.76473	12.2299	12.3609	8.40565	9.95338	10.7286	11.618	7.3131	8.97546	11.0043	10.9107
	incidence			1.08156	1.12513		1.05304	1.08763	1.10482				1.07556			1.07665	1.10948		1.05408	1.09809	1.09314		0.979905		1.05926	0.972335		1.04007	1.09094	0.969843	1.04508	1.08228	1.07634		0.976201	0.979426	1.0502	0.953758			1.07308	0.948094		1.04372	1.05075		0.977242		1.0586
	loglik
Cib	inters	8.84136	10.088	12.6835	15.3135	8.52452	9.11016	9.32818	11.31	8.40084	9.28388	9.40415	11.2289	9.36022	10.6015	12.6251	15.1702	8.94372	9.10091	9.91409	11.8394	8.61318	9.50612	9.61193	11.4568	11.3486	11.9076	14.1721	19.5335	9.39531	9.63125	10.886	13.7638	9.31018	10.2886	11.7238	14.9289	13.0558	13.6412	15.2673	23.8678	10.0273	10.6278	11.8637	15.4488	9.08919	10.2427	11.3806	14.88
	incidence				0.858603			1.15958	1.27446						1.15856				1.16227	1.19434	1.28145	1.16139		1.18266	1.2474	0.770661	0.797385	0.782056	0.597016							0.848507		0.675546	0.715077	0.686964	0.46893					0.811623	0.821946	0.811044	0.790737
	loglik
Cpy	inters	17.3125	18.4388	17.61	20.4929	15.2284	16.0066	18.0815	17.911	11.6511	13.683	18.0385	20.2265	11.7201	14.4585	14.8141	14.9883	10.2606	11.6255	12.2731	13.8416	8.21334	9.74225	12.8083	13.3805	11.4596	15.1231	18.402	22.488	9.58226	10.5518	12.0342	14.8764	7.71075	8.71323	10.6054	11.7438	11.1143	14.3369	17.1211	19.2108	8.39914	9.48913	12.8434	15.606	7.08479	7.48916	8.54772	9.47993
	incidence	1.21265	1.22622	1.25913	1.24119	1.23374	1.24782	1.24042	1.25298	1.26151	1.26262	1.24965	1.22289	1.31731	1.27541	1.27916	1.29264	1.33999	1.32002	1.32203	1.31197	1.33896	1.32399	1.27904	1.26562	1.35837	1.28729	1.24764	1.19694	1.34933	1.38172	1.35891	1.32547	1.40705	1.39655	1.378	1.36044	1.2997	1.25401	1.21316	1.18165	1.31861	1.34792	1.28746	1.26039	1.38485	1.3858	1.38254	1.35693
	loglik
Oam	inters	4.95406	5.1336	5.73675	7.54898	4.87851	5.27872	6.88504	8.70916	4.94524	5.45893	5.9262	7.40844	6.32486	6.85497	8.19371	10.0742	5.50896	6.18085	9.60782	8.39396	6.14675	7.22352	8.29282	10.9033	5.38812	6.19208	7.76982	8.52594	4.86551	5.91192	6.60085	8.21871	6.77465	8.61958	9.81742	12.7093	8.45732	10.2975	12.357	12.8015	7.91116	10.727	15.0181	19.1241	7.1148	8.77786	8.85871	10.3724
	incidence	1.01187			0.986708						1.01275	1.0301	1.0312	1.01519				1.02679	1.02679		1.10031		1.05402	1.04825					1.07517	1.01671	1.01637	1.08663	1.08728				0.94467	0.885011	0.906283	0.920007		0.842327	0.811666	0.783593	0.787857	0.926602	0.948176		0.946547
	loglik
#	INTERS	17	19	19	19	17	18	19	19	16	17	19	19	17	19	19	19	17	18	19	19	16	17	19	19	17	19	19	19	17	18	19	19	16	17	19	19	17	19	19	19	17	18	19	19	16	17	19	19
#	INCID	11	10	10	10	9	10	13	12	9	8	9	10	11	10	10	8	11	12	12	12	12	12	10	10	13	13	14	13	12	13	11	10	12	12	12	10	16	15	16	14	12	12	14	13	14	14	12	12
MED	INTERS	5.90151	5.9296	6.51848	7.64173	6.14995	5.94866	6.29578	7.07315	5.6999	6.259	6.3662	6.99525	6.03633	6.31746	6.98722	8.17949	6.62045	6.77483	7.31677	8.56416	6.07482	7.1338	7.20038	7.8763	7.04425	7.81899	9.68533	11.2256	6.99928	7.79453	9.57686	15.6765	7.39614	9.03301	10.179	12.4484	6.94051	7.14462	8.2937	9.70002	6.85432	6.1576	6.87443	8.02071	5.94819	6.46258	6.51411	7.50563
MED	INCID	0.923047	0.92983	0.956297	0.953345	0.946811	0.961386	0.975697	1.00071	0.928189	0.936054	0.940682	0.944494	0.906116	0.907093	0.900306	0.901099	0.925649	0.930935	0.925316	0.94625	0.906497	0.817733	0.802606	0.922467	0.891601	0.878001	0.892329	0.877279	0.944444	0.902479	0.884817	0.881863	0.801803	0.794459	0.783234	0.867957	0.870535	0.836771	0.841687	0.779181	0.921772	0.91199	0.913369	0.902201	0.861385	0.861592	0.843682	0.927342
		BASELINE	2020	2050	2080
MEDIAN
#	INTERS	19	19	19	19
#	INCID	10	11	12	14
1ST QUARTILE
#	INTERS	17	17	17	17
#	INCID	9	10	11.75	12
3RD QUARTILE
#	INTERS	19	19	19	19
#	INCID	10.25	12	13	14.25
INTERQUARTILE RANGE X 1.5
#	INTERS	3	3	3	3
#	INCID	1.875	3	1.875	3.375
		BASELINE	2020	2050	2080
AVERAGE
MED	INTERS	6.39827	7.09017	9.57316	7.20137
MED	INCID	0.949712	0.899339	0.866689	0.872626
SD
MED	INTERS	0.573774	0.804078	2.5747	1.05214
MED	INCID	0.0220366	0.0439827	0.0484275	0.0442701

## Sheet: 2.ARABLE
		Baseline												2020												2050												2080
		RCP 8.5				RACP 6.0				RCP 4.5				RCP 8.5				RACP 6.0				RCP 4.5				RCP 8.5				RACP 6.0				RCP 4.5				RCP 8.5				RACP 6.0				RCP 4.5
Aal	inters	3.24236	3.21538	3.31127	3.40734	3.19589	3.34031	3.41271	3.44922	3.25242	3.32733	3.46132	3.47781	2.71827	2.80438	2.95743	3.05198	2.79907	2.98274	3.08351	3.21521	2.76418	2.79475	3.02606	3.1871	2.40113	2.54286	2.62181	2.67245	2.43297	2.55674	2.7155	2.78864	2.13054	2.17627	2.30784	2.53956	2.49375	2.64921	2.70083	2.76981	2.44471	2.6023	2.74769	2.76439	2.00144	2.14449	2.24556	2.46033
	incidence	0.973593	0.974218	0.971983	0.969707	0.976137	0.972818	0.971124	0.970262	0.973643	0.971893	0.968709	0.968312	0.98433	0.982428	0.978975	0.976795	0.984331	0.980292	0.977516	0.97445	0.982471	0.981779	0.977441	0.973981	0.991439	0.988497	0.986826	0.985742	0.991713	0.989178	0.986125	0.984271	0.995442	0.994824	0.992411	0.987936	0.989133	0.986241	0.98481	0.983305	0.990536	0.987926	0.984839	0.984479	0.996423	0.994652	0.992906	0.988121
	loglik	-699.782	-714.586	-731.812	-751.224	-708.578	-732.065	-746.783	-769.686	-697.565	-730.109	-759.775	-783.303	-649.143	-641.909	-642.82	-649.804	-652.982	-663.464	-668.076	-676.068	-669.492	-700.116	-703.328	-701.909	-679.98	-696.378	-724.025	-756.005	-676.059	-707.81	-734.55	-768.935	-666.321	-704.133	-748.652	-781.176	-673.675	-700.196	-716.157	-729.328	-663.609	-699.611	-714.101	-753.692	-617.958	-650.262	-677.667	-718.31
Gpy	inters	1.56232	1.88928	2.30957	2.84916	1.60662	1.88989	2.33355	2.88466	1.42708	1.74516	2.20409	2.88042	1.69992	2.05207	2.58393	3.24995	1.70018	2.03618	2.57513	3.21234	1.51639	1.86031	2.48484	3.3226	1.84253	2.19467	2.91318	3.60323	1.83133	2.17283	2.8838	3.57476	1.60066	1.96081	2.71259	3.67008	1.86859	2.21463	2.9618	3.70898	1.89937	2.23352	3.03934	3.75571	1.63128	1.98802	2.80446	3.76218
	incidence	0.99001	0.993048	0.99082	0.989089	0.993064	0.998026	0.994988	0.996269	0.992036	0.997185	0.99814	0.994663	0.98416	0.987181	0.982499	0.980881	0.988207	0.99262	0.987318	0.988612	0.987984	0.993186	0.990984	0.988232	0.975734	0.980691	0.973004	0.972214	0.981126	0.986806	0.978766	0.983136	0.983565	0.989201	0.985486	0.981775	0.974243	0.97929	0.971147	0.968948	0.976991	0.983859	0.972684	0.976852	0.981916	0.98752	0.981858	0.978762
	loglik	-387.153	-386.559	-406.826	-390.101	-391.487	-386.251	-403.35	-374.002	-395.869	-401.214	-411.011	-391.891	-389.817	-392.654	-412.004	-395.297	-392.301	-393.492	-411.534	-386.479	-401.305	-405.525	-421.749	-396.093	-393.656	-398.871	-418.676	-404.824	-395.801	-399.211	-421.636	-397.62	-405.065	-414.114	-433.035	-409.289	-401.844	-406.808	-433.434	-419.562	-407.874	-408.25	-438.282	-415.817	-410.641	-420.049	-440.505	-417.043
Lti	inters	1.89354e-09	1.89354e-09	1.89354e-09	1.89354e-09	8.31962e-11	8.31962e-11	8.31962e-11	8.31962e-11	2.2221e-10	2.2221e-10	2.2221e-10	2.2221e-10	1.89354e-09	1.89354e-09	1.89354e-09	1.89354e-09	8.31962e-11	8.31962e-11	8.31962e-11	8.31962e-11	2.2221e-10	2.2221e-10	2.2221e-10	2.2221e-10	1.89354e-09	1.89354e-09	1.89354e-09	1.89354e-09	8.31962e-11	8.31962e-11	8.31962e-11	8.31962e-11	2.2221e-10	2.2221e-10	2.2221e-10	2.2221e-10	1.89354e-09	1.89354e-09	1.89354e-09	1.89354e-09	8.31962e-11	8.31962e-11	8.31962e-11	8.31962e-11	2.2221e-10	2.2221e-10	2.2221e-10	2.2221e-10
	incidence	1	1	1	1	1	1	1	1	1	1	1	1	1	1	1	1	1	1	1	1	1	1	1	1	1	1	1	1	1	1	1	1	1	1	1	1	1	1	1	1	1	1	1	1	1	1	1	1
	loglik	-1.38484e-06	-1.38484e-06	-1.38484e-06	-1.38484e-06	1.82785e-05	1.82785e-05	1.82785e-05	1.82785e-05	-6.50942e-05	-6.50942e-05	-6.50942e-05	-6.50942e-05	-1.38484e-06	-1.38484e-06	-1.38484e-06	-1.38484e-06	1.82785e-05	1.82785e-05	1.82785e-05	1.82785e-05	-6.50942e-05	-6.50942e-05	-6.50942e-05	-6.50942e-05	-1.38484e-06	-1.38484e-06	-1.38484e-06	-1.38484e-06	1.82785e-05	1.82785e-05	1.82785e-05	1.82785e-05	-6.50942e-05	-6.50942e-05	-6.50942e-05	-6.50942e-05	-1.38484e-06	-1.38484e-06	-1.38484e-06	-1.38484e-06	1.82785e-05	1.82785e-05	1.82785e-05	1.82785e-05	-6.50942e-05	-6.50942e-05	-6.50942e-05	-6.50942e-05
Sci	inters	1.74347e-11	1.74347e-11	1.74347e-11	1.74347e-11	2.54803e-09	2.54803e-09	2.54803e-09	2.54803e-09	7.48909e-09	7.48909e-09	7.48909e-09	7.48909e-09	1.74347e-11	1.74347e-11	1.74347e-11	1.74347e-11	2.54803e-09	2.54803e-09	2.54803e-09	2.54803e-09	7.48909e-09	7.48909e-09	7.48909e-09	7.48909e-09	1.74347e-11	1.74347e-11	1.74347e-11	1.74347e-11	2.54803e-09	2.54803e-09	2.54803e-09	2.54803e-09	7.48909e-09	7.48909e-09	7.48909e-09	7.48909e-09	1.74347e-11	1.74347e-11	1.74347e-11	1.74347e-11	2.54803e-09	2.54803e-09	2.54803e-09	2.54803e-09	7.48909e-09	7.48909e-09	7.48909e-09	7.48909e-09
	incidence	1	1	1	1	1	1	1	1	1	1	1	1	1	1	1	1	1	1	1	1	1	1	1	1	1	1	1	1	1	1	1	1	1	1	1	1	1	1	1	1	1	1	1	1	1	1	1	1
	loglik	0.000192834	0.000192834	0.000192834	0.000192834	2.38003e-07	2.38003e-07	2.38003e-07	2.38003e-07	-8.49138e-07	-8.49138e-07	-8.49138e-07	-8.49138e-07	0.000192834	0.000192834	0.000192834	0.000192834	2.38003e-07	2.38003e-07	2.38003e-07	2.38003e-07	-8.49138e-07	-8.49138e-07	-8.49138e-07	-8.49138e-07	0.000192834	0.000192834	0.000192834	0.000192834	2.38003e-07	2.38003e-07	2.38003e-07	2.38003e-07	-8.49138e-07	-8.49138e-07	-8.49138e-07	-8.49138e-07	0.000192834	0.000192834	0.000192834	0.000192834	2.38003e-07	2.38003e-07	2.38003e-07	2.38003e-07	-8.49138e-07	-8.49138e-07	-8.49138e-07	-8.49138e-07
Pvo	inters	3.04572	3.01223	3.0183	3.02275	1.35299	1.36565	1.38787	1.40411	1.8276e-11	1.8276e-11	1.8276e-11	1.8276e-11	2.97462	2.92258	2.93643	2.95503	1.34753	1.3604	1.37484	1.39905	1.8276e-11	1.8276e-11	1.8276e-11	1.8276e-11	2.85056	2.80106	2.81438	2.84285	1.36526	1.36212	1.37653	1.40063	1.8276e-11	1.8276e-11	1.8276e-11	1.8276e-11	2.87604	2.84713	2.81553	2.85285	1.38376	1.38071	1.39514	1.41112	1.8276e-11	1.8276e-11	1.8276e-11	1.8276e-11
	incidence	0.951141	0.964129	0.804884	0.901433	0.871137	0.87482	0.873014	0.870758	1	1	1	1	1.00462	1.10939	0.891072	0.932557	0.891961	0.894796	0.893383	0.890206	1	1	1	1	1.18208	1.28955	0.991129	1.0257	0.898507	0.903112	0.90172	0.898647	1	1	1	1	1.28971	1.38439	1.40163	1.40336	0.903457	0.907779	0.906408	0.904426	1	1	1	1
	loglik	-274.076	-274.124	-274.837	-270.818	-301.722	-304.018	-303.371	-306.51	0.000268963	0.000268963	0.000268963	0.000268963	-266.359	-266.236	-268.005	-264.633	-290.556	-292.814	-293.605	-297.411	0.000268963	0.000268963	0.000268963	0.000268963	-263.822	-264.542	-266.866	-264.788	-286.955	-288.262	-288.372	-291.482	0.000268963	0.000268963	0.000268963	0.000268963	-265.968	-264.552	-264.091	-262.431	-299.923	-301.325	-300.874	-301.989	0.000268963	0.000268963	0.000268963	0.000268963
Cfi	inters	3.87995e-12	0.0487376	0.212183	0.413659	2.53719e-11	0.00434082	0.271886	0.552398	3.7286e-10	3.7286e-10	0.102166	0.27768	3.87995e-12	0.0428151	0.206698	0.42331	2.53719e-11	0.00434082	0.268067	0.527628	3.7286e-10	3.7286e-10	0.0980072	0.287087	3.87995e-12	0.0369255	0.21006	0.419311	2.53719e-11	0.00434082	0.2672	0.51284	3.7286e-10	3.7286e-10	0.0944684	0.308024	3.87995e-12	0.0310842	0.208851	0.406885	2.53719e-11	0.00718517	0.269458	0.522529	3.7286e-10	3.7286e-10	0.0947162	0.320258
	incidence	0.999997	0.929315	0.953448	1.06373	1	1.03919	0.895393	0.870141	1	1	1.02304	1.05792	0.999997	0.938506	0.951839	1.05326	1	1.03919	0.92281	0.914763	1	1	1.03446	1.05257	0.999997	0.949163	0.976337	1.05261	1	1.03919	0.95348	0.949061	1	1	1.04384	1.04533	0.999997	0.961608	0.995582	1.05098	1	0.61473	0.983643	0.970147	1	1	1.04781	1.03968
	loglik	0.00406304	-46.5176	-137.014	-236.499	0.000309086	-7.02554	-153.521	-226.842	6.16627e-06	6.16627e-06	-101.124	-227.67	0.00406304	-40.6096	-133.102	-236.407	0.000309086	-7.02554	-152.196	-225.946	6.16627e-06	6.16627e-06	-100.173	-225.962	0.00406304	-36.2449	-138.075	-235.877	0.000309086	-7.02554	-159.106	-232.282	6.16627e-06	6.16627e-06	-102.992	-228.986	0.00406304	-33.5215	-145.218	-235.781	0.000309086	-6.82765	-171.533	-249.836	6.16627e-06	6.16627e-06	-108.896	-231.4
Ccr	inters	7.03535e-09	7.03535e-09	7.03535e-09	7.03535e-09	1.30141e-09	1.30141e-09	1.30141e-09	1.30141e-09	7.48909e-09	7.48909e-09	7.48909e-09	7.48909e-09	7.03535e-09	7.03535e-09	7.03535e-09	7.03535e-09	1.30141e-09	1.30141e-09	1.30141e-09	1.30141e-09	7.48909e-09	7.48909e-09	7.48909e-09	7.48909e-09	7.03535e-09	7.03535e-09	7.03535e-09	7.03535e-09	1.30141e-09	1.30141e-09	1.30141e-09	1.30141e-09	7.48909e-09	7.48909e-09	7.48909e-09	7.48909e-09	7.03535e-09	7.03535e-09	7.03535e-09	7.03535e-09	1.30141e-09	1.30141e-09	1.30141e-09	1.30141e-09	7.48909e-09	7.48909e-09	7.48909e-09	7.48909e-09
	incidence	1	1	1	1	1	1	1	1	1	1	1	1	1	1	1	1	1	1	1	1	1	1	1	1	1	1	1	1	1	1	1	1	1	1	1	1	1	1	1	1	1	1	1	1	1	1	1	1
	loglik	-5.0108e-06	-5.0108e-06	-5.0108e-06	-5.0108e-06	-1.96235e-06	-1.96235e-06	-1.96235e-06	-1.96235e-06	-3.60166e-06	-3.60166e-06	-3.60166e-06	-3.60166e-06	-5.0108e-06	-5.0108e-06	-5.0108e-06	-5.0108e-06	-1.96235e-06	-1.96235e-06	-1.96235e-06	-1.96235e-06	-3.60166e-06	-3.60166e-06	-3.60166e-06	-3.60166e-06	-5.0108e-06	-5.0108e-06	-5.0108e-06	-5.0108e-06	-1.96235e-06	-1.96235e-06	-1.96235e-06	-1.96235e-06	-3.60166e-06	-3.60166e-06	-3.60166e-06	-3.60166e-06	-5.0108e-06	-5.0108e-06	-5.0108e-06	-5.0108e-06	-1.96235e-06	-1.96235e-06	-1.96235e-06	-1.96235e-06	-3.60166e-06	-3.60166e-06	-3.60166e-06	-3.60166e-06
Mca	inters	1.10002	1.52955	2.29099	3.75575	1.06038	1.56745	2.21238	3.59159	1.48567	1.95697	2.8316	4.31875	1.12343	1.526	2.23812	3.70426	1.08095	1.59294	2.26104	3.63458	1.48691	1.92622	2.82476	4.36638	1.07973	1.4417	2.08411	3.5282	1.03494	1.50634	2.13046	3.36927	1.42725	1.86532	2.69439	4.19558	0.998714	1.383	1.9944	3.22336	0.948484	1.38785	1.92001	3.07671	1.32513	1.76146	2.4876	3.84516
	incidence	1.02221	1.01953	1.01604	1.01038	1.02279	1.01955	1.01643	1.01104	1.01689	1.01497	1.01189	1.00621	1.01851	1.01629	1.013	1.00714	1.01957	1.01625	1.01302	1.00772	1.01419	1.01232	1.00864	1.00327	1.01916	1.01691	1.01382	1.00759	1.01973	1.01671	1.01351	1.00844	1.01481	1.01233	1.00914	1.0034	1.02025	1.0175	1.01441	1.00882	1.0208	1.01777	1.01476	1.00949	1.01574	1.01302	1.01007	1.00437
	loglik	-384.958	-394.072	-398.18	-413.837	-385.707	-394.196	-392.699	-417.37	-426.699	-423.174	-433.367	-475.953	-429.803	-443.184	-458.393	-479.916	-422.8	-441.619	-445.665	-477.23	-454.883	-456.075	-477.112	-509.672	-392.681	-398.502	-401.093	-417.627	-394.706	-406.096	-401.406	-425.496	-422.866	-423.712	-432.707	-467.818	-362.771	-362.618	-349.848	-360.438	-366.06	-364.848	-355.034	-367.022	-395.413	-395.912	-396.676	-427.256
Mav	inters	1.66128e-09	1.66128e-09	1.66128e-09	1.66128e-09	1.98441e-09	1.98441e-09	1.98441e-09	1.98441e-09	1.87486e-10	1.87486e-10	1.87486e-10	1.87486e-10	1.66128e-09	1.66128e-09	1.66128e-09	1.66128e-09	1.98441e-09	1.98441e-09	1.98441e-09	1.98441e-09	1.87486e-10	1.87486e-10	1.87486e-10	1.87486e-10	1.66128e-09	1.66128e-09	1.66128e-09	1.66128e-09	1.98441e-09	1.98441e-09	1.98441e-09	1.98441e-09	1.87486e-10	1.87486e-10	1.87486e-10	1.87486e-10	1.66128e-09	1.66128e-09	1.66128e-09	1.66128e-09	1.98441e-09	1.98441e-09	1.98441e-09	1.98441e-09	1.87486e-10	1.87486e-10	1.87486e-10	1.87486e-10
	incidence	1	1	1	1	1	1	1	1	1	1	1	1	1	1	1	1	1	1	1	1	1	1	1	1	1	1	1	1	1	1	1	1	1	1	1	1	1	1	1	1	1	1	1	1	1	1	1	1
	loglik	-6.73001e-06	-6.73001e-06	-6.73001e-06	-6.73001e-06	8.60145e-06	8.60145e-06	8.60145e-06	8.60145e-06	2.12292e-05	2.12292e-05	2.12292e-05	2.12292e-05	-6.73001e-06	-6.73001e-06	-6.73001e-06	-6.73001e-06	8.60145e-06	8.60145e-06	8.60145e-06	8.60145e-06	2.12292e-05	2.12292e-05	2.12292e-05	2.12292e-05	-6.73001e-06	-6.73001e-06	-6.73001e-06	-6.73001e-06	8.60145e-06	8.60145e-06	8.60145e-06	8.60145e-06	2.12292e-05	2.12292e-05	2.12292e-05	2.12292e-05	-6.73001e-06	-6.73001e-06	-6.73001e-06	-6.73001e-06	8.60145e-06	8.60145e-06	8.60145e-06	8.60145e-06	2.12292e-05	2.12292e-05	2.12292e-05	2.12292e-05
Dni	inters	1.34468	1.87537	2.32161	2.72553	1.34781	1.65543	2.23357	2.88649	1.48093	2.04843	2.45329	3.00877	1.36291	1.91793	2.40995	2.94268	1.36406	1.70302	2.32732	3.10804	1.50866	2.09502	2.53575	3.19758	1.37444	1.93566	2.47317	3.06878	1.3787	1.73124	2.37392	3.19086	1.52981	2.1216	2.56685	3.25304	1.3873	1.95798	2.52363	3.0658	1.38834	1.74194	2.41143	3.17599	1.52704	2.12956	2.58936	3.31251
	incidence	1.00059	1.00044	1.00985	1.02396	0.998304	1.00075	1.0022	1.00817	0.999548	0.999923	1.00449	1.01363	0.999411	0.998383	1.00717	1.01852	0.997285	0.999082	0.999358	1.00476	0.997853	0.99776	1.00209	1.01034	0.998641	0.997487	1.0046	1.0144	0.996343	0.997617	0.997483	1.00229	0.996507	0.996477	1.00083	1.00776	0.99776	0.996325	1.00244	1.01277	0.995709	0.997046	0.995901	1.00187	0.996686	0.996085	0.9999	1.00583
	loglik	-315.612	-345.383	-354.713	-337.986	-309.136	-335.843	-355.61	-352.517	-323.03	-343.913	-361.138	-354.44	-314.555	-342.728	-355.914	-346.978	-310	-334.016	-355.608	-347.565	-325.646	-345.885	-362.157	-356.58	-315.102	-340.492	-355.096	-351.66	-308.312	-333.237	-353.528	-348.884	-322.683	-342.232	-358.26	-355.287	-311.673	-336.248	-349.973	-349.621	-306.05	-329.242	-346.457	-342.586	-317.809	-334.231	-351.658	-352.076
Sbe	inters	1.58785e-11	1.58785e-11	1.58785e-11	1.58785e-11	1.84218e-10	1.84218e-10	1.84218e-10	1.84218e-10	1.44575e-11	1.44575e-11	1.44575e-11	1.44575e-11	1.58785e-11	1.58785e-11	1.58785e-11	1.58785e-11	1.84218e-10	1.84218e-10	1.84218e-10	1.84218e-10	1.44575e-11	1.44575e-11	1.44575e-11	1.44575e-11	1.58785e-11	1.58785e-11	1.58785e-11	1.58785e-11	1.84218e-10	1.84218e-10	1.84218e-10	1.84218e-10	1.44575e-11	1.44575e-11	1.44575e-11	1.44575e-11	1.58785e-11	1.58785e-11	1.58785e-11	1.58785e-11	1.84218e-10	1.84218e-10	1.84218e-10	1.84218e-10	1.44575e-11	1.44575e-11	1.44575e-11	1.44575e-11
	incidence	1	1	1	1	1	1	1	1	1	1	1	1	1	1	1	1	1	1	1	1	1	1	1	1	1	1	1	1	1	1	1	1	1	1	1	1	1	1	1	1	1	1	1	1	1	1	1	1
	loglik	0.00081642	0.00081642	0.00081642	0.00081642	5.73215e-05	5.73215e-05	5.73215e-05	5.73215e-05	0.000506521	0.000506521	0.000506521	0.000506521	0.00081642	0.00081642	0.00081642	0.00081642	5.73215e-05	5.73215e-05	5.73215e-05	5.73215e-05	0.000506521	0.000506521	0.000506521	0.000506521	0.00081642	0.00081642	0.00081642	0.00081642	5.73215e-05	5.73215e-05	5.73215e-05	5.73215e-05	0.000506521	0.000506521	0.000506521	0.000506521	0.00081642	0.00081642	0.00081642	0.00081642	5.73215e-05	5.73215e-05	5.73215e-05	5.73215e-05	0.000506521	0.000506521	0.000506521	0.000506521
Hcr	inters	1.65073	2.26474	2.81875	4.31987	1.65019	2.25181	2.73052	4.61745	1.63336	2.26646	2.64265	3.76913	1.69185	2.3727	2.94745	4.50347	1.71864	2.36619	2.86959	4.85154	1.64924	2.31874	2.77598	3.9218	1.82145	2.41432	3.02078	4.48731	1.87688	2.47002	2.98953	4.90656	1.81471	2.44375	2.91673	4.11748	1.94418	2.58374	3.25683	4.74042	2.02194	2.66331	3.24442	5.22184	1.94665	2.63813	3.20766	4.45556
	incidence	1.00825	1.00586	1.00425	0.999949	1.00843	1.00551	1.0046	0.998513	1.00877	1.00582	1.00566	1.00214	1.00754	1.0045	1.00292	0.998645	1.00738	1.00427	1.00334	0.997239	1.00825	1.00483	1.00388	1.00087	1.00532	1.00335	1.0017	0.998083	1.00483	1.00254	1.00159	0.996101	1.00587	1.00324	1.0025	0.999393	1.00359	1.00153	0.999282	0.995779	1.00286	1.00033	0.999191	0.993404	1.00358	1.00088	0.999815	0.996951
	loglik	-451.05	-464.449	-469.632	-459.058	-447.011	-466.088	-469.705	-462.343	-447.762	-461.966	-469.887	-475.811	-452.348	-463.348	-468.222	-465.276	-446.505	-463.421	-465.845	-462.674	-450.724	-465.273	-471.118	-479.162	-440.481	-449.561	-453.572	-436.316	-434.465	-450.865	-449.934	-434.644	-439.159	-453.75	-452.108	-454.944	-422.095	-427.895	-429.961	-411.019	-418.681	-431.802	-424.657	-411.449	-427.451	-434.466	-427.808	-425.806
Cau	inters	NA	NA	NA	NA	NA	NA	NA	NA	NA	NA	NA	NA	NA	NA	NA	NA	NA	NA	NA	NA	NA	NA	NA	NA	NA	NA	NA	NA	NA	NA	NA	NA	NA	NA	NA	NA	NA	NA	NA	NA	NA	NA	NA	NA	NA	NA	NA	NA
	incidence	NA	NA	NA	NA	NA	NA	NA	NA	NA	NA	NA	NA	NA	NA	NA	NA	NA	NA	NA	NA	NA	NA	NA	NA	NA	NA	NA	NA	NA	NA	NA	NA	NA	NA	NA	NA	NA	NA	NA	NA	NA	NA	NA	NA	NA	NA	NA	NA
	loglik	NA	NA	NA	NA	NA	NA	NA	NA	NA	NA	NA	NA	NA	NA	NA	NA	NA	NA	NA	NA	NA	NA	NA	NA	NA	NA	NA	NA	NA	NA	NA	NA	NA	NA	NA	NA	NA	NA	NA	NA	NA	NA	NA	NA	NA	NA	NA	NA
Clu	inters	5.2147	5.88058	6.80042	8.67433	4.8389	6.36014	7.09764	7.77527	3.46834	4.17534	5.58067	6.5597	4.69108	5.16714	5.99229	7.42961	4.363	5.65961	6.47073	7.0016	3.28711	3.92302	5.17226	5.99691	4.38434	4.94683	5.85655	7.01845	4.29687	5.41109	6.10203	6.48627	3.2963	3.94404	5.03578	5.92651	4.27071	5.04324	6.54127	8.89819	4.13699	5.00011	5.54543	5.91634	3.28062	3.93164	4.96843	5.71502
	incidence	1.00141	0.998168	0.986753	0.970352	0.89622	0.816823	0.717407	0.708507	0.906029	0.901162	0.883128	0.868714	1.01076	1.00731	1.00117	0.988109	0.908502	0.828525	0.713277	0.719128	0.907371	0.903216	0.888185	0.870243	1.00541	0.983442	0.964159	0.952708	0.907799	0.852771	0.728847	0.742004	0.890892	0.88472	0.8832	0.856268	0.95865	0.92668	0.832886	0.782167	0.90805	0.867629	0.780347	0.772097	0.871369	0.864412	0.864313	0.856041
	loglik	-280.333	-266.575	-238.871	-198.033	-253.368	-217.036	-221.804	-211.153	-313.887	-291.225	-264.397	-257.669	-273.272	-259.106	-240.398	-216.71	-270.676	-249.797	-252.612	-244.591	-320.47	-298.497	-271.265	-262.552	-258.591	-250.401	-238.15	-216.274	-255.821	-231.244	-227.534	-224.761	-307.826	-288.021	-263.555	-261.016	-283.305	-283.092	-270.147	-241.897	-246.091	-226.036	-226.601	-216.613	-297.579	-277.61	-260.294	-256.639
Ala	inters	NA	NA	NA	NA	9.70529	10.8998	11.8928	13.44	10.4997	11.4847	11.8437	NA	NA	NA	NA	NA	11.6399	11.7599	13.5	15.7895	12.7692	NA	NA	NA	NA	NA	NA	NA	NA	NA	NA	NA	NA	NA	NA	NA	NA	NA	NA	NA	NA	NA	NA	NA	NA	NA	NA	NA
	incidence	NA	NA	NA	NA	0.245987	0.215619	0.102111	0.0888738	0.117623	2.45919e-08	2.46075e-08	NA	NA	NA	NA	NA	0.104633	0.103421	0.0884255	2.43629e-08	2.45132e-08	NA	NA	NA	NA	NA	NA	NA	NA	NA	NA	NA	NA	NA	NA	NA	NA	NA	NA	NA	NA	NA	NA	NA	NA	NA	NA	NA
	loglik	NA	NA	NA	NA	-189.175	-177.34	-182.55	-189.515	-243.281	-228.264	-238.409	NA	NA	NA	NA	NA	-224.13	-263.614	-274.296	-280.898	-277.522	NA	NA	NA	NA	NA	NA	NA	NA	NA	NA	NA	NA	NA	NA	NA	NA	NA	NA	NA	NA	NA	NA	NA	NA	NA	NA	NA
Uar	inters	3.12192e-09	0.0940471	0.351459	0.651802	5.67342e-11	5.67342e-11	0.134097	0.414443	7.48909e-09	7.48909e-09	0.0678522	0.264353	3.12192e-09	0.0998301	0.363079	0.648432	5.67342e-11	5.67342e-11	0.146874	0.420508	7.48909e-09	7.48909e-09	0.0617423	0.278218	3.12192e-09	0.105603	0.353848	0.640486	5.67342e-11	5.67342e-11	0.146874	0.378222	7.48909e-09	7.48909e-09	0.0617423	0.272385	3.12192e-09	0.111365	0.364344	0.632658	5.67342e-11	5.67342e-11	0.158805	0.377838	7.48909e-09	7.48909e-09	0.0617423	0.260705
	incidence	1	5.51313e-10	0.36524	1.15389	1	1	0.47317	0.845637	1	1	0.000488685	0.962445	1	1.20239e-09	1.06526	1.27878	1	1	4.07695e-10	0.825765	1	1	0.000498528	1.11066	1	3.62902e-10	1.32303	1.13186	1	1	4.07684e-10	1.37139	1	1	0.000498553	1.12406	1	4.93007e-10	1.7719	0.977189	1	1	1.52791e-09	0.982834	1	1	0.000498563	1.15147
	loglik	-2.84799e-06	-68.7512	-183.643	-257.473	0.000239699	0.000239699	-90.6689	-201.731	-2.71393e-06	-2.71393e-06	-51.9972	-159.022	-2.84799e-06	-72.5073	-196.484	-265.703	0.000239699	0.000239699	-94.1177	-210.713	-2.71393e-06	-2.71393e-06	-49.4188	-170.076	-2.84799e-06	-76.0231	-194.671	-267.573	0.000239699	0.000239699	-96.4204	-199.479	-2.71393e-06	-2.71393e-06	-48.1658	-166.686	-2.84799e-06	-81.5161	-201.777	-265.874	0.000239699	0.000239699	-103.675	-196.624	-2.71393e-06	-2.71393e-06	-47.878	-159.002
Mlu	inters	6.56852	7.91848	9.06342	10.9426	9.20189	11.4606	12.5107	12.6483	4.17368	4.95285	6.33139	8.07562	6.25304	7.74428	9.17477	12.806	9.58791	11.8919	13.1464	14.3544	4.40448	5.18934	6.29427	7.86636	6.35438	7.97756	10.1723	13.1915	9.75123	11.6206	12.4125	15.2118	4.25793	5.04789	6.3961	7.80587	5.90503	6.67018	7.43165	9.6903	8.24786	8.98135	9.79009	11.2966	3.97681	4.77355	5.99742	7.21749
	incidence	0.993234	0.989608	0.98267	0.979792	0.988348	0.982347	0.981108	0.984636	0.999496	0.999133	0.993234	0.988235	0.987483	0.98122	0.972818	0.963978	0.980238	0.974976	0.972993	0.973879	0.993755	0.99222	0.987726	0.980019	0.988498	0.977549	0.96397	0.959159	0.979554	0.9756	0.976535	0.974854	0.993275	0.992232	0.988195	0.981483	0.990242	0.983333	0.975891	0.966551	0.981969	0.980794	0.98167	0.98223	0.994685	0.993427	0.98965	0.983093
	loglik	-348.33	-390.083	-421.545	-409.52	-347.518	-361.894	-384.229	-390.611	-377.634	-371.851	-376.942	-365.069	-366.555	-395.603	-412.711	-375.391	-352.586	-356.944	-364.937	-347.873	-386.391	-392.868	-398.597	-403.405	-323.105	-345.807	-337.294	-302.84	-324.76	-332.202	-353.4	-320.493	-368.872	-370.371	-356.898	-358.617	-323.664	-380.899	-418.702	-431.261	-357.102	-407.048	-426.221	-457.634	-376.771	-380.172	-372.693	-388.021
Mpu	inters	7.48909e-09	7.48909e-09	7.48909e-09	7.48909e-09	4.41918e-10	4.41918e-10	4.41918e-10	4.41918e-10	2.54803e-09	2.54803e-09	2.54803e-09	2.54803e-09	7.48909e-09	7.48909e-09	7.48909e-09	7.48909e-09	4.41918e-10	4.41918e-10	4.41918e-10	4.41918e-10	2.54803e-09	2.54803e-09	2.54803e-09	2.54803e-09	7.48909e-09	7.48909e-09	7.48909e-09	7.48909e-09	4.41918e-10	4.41918e-10	4.41918e-10	4.41918e-10	2.54803e-09	2.54803e-09	2.54803e-09	2.54803e-09	7.48909e-09	7.48909e-09	7.48909e-09	7.48909e-09	4.41918e-10	4.41918e-10	4.41918e-10	4.41918e-10	2.54803e-09	2.54803e-09	2.54803e-09	2.54803e-09
	incidence	1	1	1	1	1	1	1	1	1	1	1	1	1	1	1	1	1	1	1	1	1	1	1	1	1	1	1	1	1	1	1	1	1	1	1	1	1	1	1	1	1	1	1	1	1	1	1	1
	loglik	-3.62392e-06	-3.62392e-06	-3.62392e-06	-3.62392e-06	-1.53508e-05	-1.53508e-05	-1.53508e-05	-1.53508e-05	-2.17802e-06	-2.17802e-06	-2.17802e-06	-2.17802e-06	-3.62392e-06	-3.62392e-06	-3.62392e-06	-3.62392e-06	-1.53508e-05	-1.53508e-05	-1.53508e-05	-1.53508e-05	-2.17802e-06	-2.17802e-06	-2.17802e-06	-2.17802e-06	-3.62392e-06	-3.62392e-06	-3.62392e-06	-3.62392e-06	-1.53508e-05	-1.53508e-05	-1.53508e-05	-1.53508e-05	-2.17802e-06	-2.17802e-06	-2.17802e-06	-2.17802e-06	-3.62392e-06	-3.62392e-06	-3.62392e-06	-3.62392e-06	-1.53508e-05	-1.53508e-05	-1.53508e-05	-1.53508e-05	-2.17802e-06	-2.17802e-06	-2.17802e-06	-2.17802e-06
Mma	inters	5.83251e-09	5.83251e-09	5.83251e-09	5.83251e-09	2.75508e-09	2.75508e-09	1.66453e-09	1.66453e-09	7.48909e-09	7.48909e-09	2.83062e-11	2.83062e-11	5.83251e-09	5.83251e-09	5.83251e-09	5.83251e-09	2.75508e-09	2.75508e-09	1.66453e-09	1.66453e-09	7.48909e-09	7.48909e-09	2.83062e-11	2.83062e-11	5.83251e-09	5.83251e-09	5.83251e-09	5.83251e-09	2.75508e-09	2.75508e-09	1.66453e-09	1.66453e-09	7.48909e-09	7.48909e-09	2.83062e-11	2.83062e-11	5.83251e-09	5.83251e-09	5.83251e-09	5.83251e-09	2.75508e-09	2.75508e-09	1.66453e-09	1.66453e-09	7.48909e-09	7.48909e-09	2.83062e-11	2.83062e-11
	incidence	1	1	1	1	1	1	1	1	1	1	1	1	1	1	1	1	1	1	1	1	1	1	1	1	1	1	1	1	1	1	1	1	1	1	1	1	1	1	1	1	1	1	1	1	1	1	1	1
	loglik	7.12862e-07	7.12862e-07	7.12862e-07	7.12862e-07	6.32768e-07	6.32768e-07	-2.77655e-06	-2.77655e-06	-2.68597e-06	-2.68597e-06	0.000580951	0.000580951	7.12862e-07	7.12862e-07	7.12862e-07	7.12862e-07	6.32768e-07	6.32768e-07	-2.77655e-06	-2.77655e-06	-2.68597e-06	-2.68597e-06	0.000580951	0.000580951	7.12862e-07	7.12862e-07	7.12862e-07	7.12862e-07	6.32768e-07	6.32768e-07	-2.77655e-06	-2.77655e-06	-2.68597e-06	-2.68597e-06	0.000580951	0.000580951	7.12862e-07	7.12862e-07	7.12862e-07	7.12862e-07	6.32768e-07	6.32768e-07	-2.77655e-06	-2.77655e-06	-2.68597e-06	-2.68597e-06	0.000580951	0.000580951
Ggu	inters	NA	NA	NA	NA	NA	NA	NA	NA	NA	NA	NA	NA	NA	NA	NA	NA	NA	NA	NA	NA	NA	NA	NA	NA	NA	NA	NA	NA	NA	NA	NA	NA	NA	NA	NA	NA	NA	NA	NA	NA	NA	NA	NA	NA	NA	NA	NA	NA
	incidence	NA	NA	NA	NA	NA	NA	NA	NA	NA	NA	NA	NA	NA	NA	NA	NA	NA	NA	NA	NA	NA	NA	NA	NA	NA	NA	NA	NA	NA	NA	NA	NA	NA	NA	NA	NA	NA	NA	NA	NA	NA	NA	NA	NA	NA	NA	NA	NA
	loglik	NA	NA	NA	NA	NA	NA	NA	NA	NA	NA	NA	NA	NA	NA	NA	NA	NA	NA	NA	NA	NA	NA	NA	NA	NA	NA	NA	NA	NA	NA	NA	NA	NA	NA	NA	NA	NA	NA	NA	NA	NA	NA	NA	NA	NA	NA	NA	NA
Llu	inters	1.45553	1.67891	1.91921	2.35865	1.28659	1.59993	1.81502	2.32653	1.32608	1.6299	1.83798	2.30119	1.46176	1.7315	1.98569	2.4495	1.29263	1.63171	1.88248	2.4425	1.33234	1.64055	1.88651	2.40663	1.46154	1.73208	1.96296	2.43092	1.29112	1.63151	1.87124	2.41392	1.3321	1.64036	1.89326	2.39257	1.45999	1.72801	1.90873	2.36594	1.29861	1.62521	1.85162	2.38365	1.3399	1.63949	1.85696	2.32161
	incidence	0.651979	0.721258	0.750852	0.760062	0.667592	0.719041	0.756185	0.756341	0.660932	0.724093	0.760777	0.781603	0.643814	0.679847	0.718855	0.718283	0.659117	0.699518	0.72136	0.712608	0.652396	0.712512	0.730319	0.730599	0.644103	0.679193	0.725055	0.717285	0.661243	0.699738	0.717244	0.703483	0.652765	0.71272	0.723964	0.726277	0.646145	0.683733	0.746269	0.739135	0.650621	0.706625	0.73609	0.727502	0.64193	0.713669	0.743529	0.766533
	loglik	-355.385	-373.766	-383.365	-412.245	-341.579	-369.97	-382.571	-411.946	-342.71	-370.358	-384.564	-419.739	-354.578	-372.395	-382.251	-407.737	-339.666	-370.819	-379.788	-403.647	-341.066	-371.187	-379.765	-412.238	-352.41	-368.691	-379.377	-402.375	-336.816	-366.7	-378.037	-401.024	-338.609	-369.235	-377.898	-409.68	-353.272	-369.254	-379.053	-403.211	-334.945	-365.996	-378.271	-400.306	-337.807	-367.707	-378.07	-411.202
Fsi	inters	2.24051	2.6958	2.98776	3.66832	2.19538	2.6695	2.97225	3.30765	2.54741	3.10428	3.35931	3.42014	2.43867	2.87214	3.2727	4.10231	2.39336	2.66833	3.02722	3.60057	2.7467	3.20994	3.62016	3.9215	3.11661	4.38619	5.49826	7.13393	2.87583	3.67288	4.02894	4.90936	2.86766	3.2596	3.9065	4.17082	4.02994	6.12799	9.10288	13.2247	3.88876	5.15794	5.90558	8.21946	3.17494	3.83544	4.54515	5.30337
	incidence	0.990485	0.999325	1.01334	1.01934	0.997558	1.00017	1.00117	1.00818	0.998605	1.002	1.00578	1.00917	0.987331	0.995497	1.0099	1.01679	0.994211	0.998343	0.998609	1.00491	0.995474	0.999088	1.00134	1.00313	0.974938	0.979083	0.990487	0.999656	0.987689	0.988977	0.988127	0.99364	0.991776	0.995227	0.995129	0.998046	0.959065	0.955904	0.959694	0.968651	0.978092	0.976876	0.976018	0.973085	0.987066	0.989478	0.987595	0.988893
	loglik	-242.138	-272.3	-238.266	-208.83	-233.886	-217.788	-216.397	-213.721	-201.574	-185.644	-185.903	-176.108	-232.951	-274.605	-257.697	-234.091	-221.796	-223.278	-230.583	-225.619	-191.689	-184.492	-191.919	-185.355	-224.422	-282.443	-313.825	-321.039	-230.343	-228.893	-247.773	-273.562	-197.043	-199.825	-212.388	-219.487	-253.777	-318.537	-359.712	-357.053	-237.887	-236.923	-253.141	-280.027	-206.013	-200.699	-217.373	-227.772
Lly	inters	6.76384e-11	6.76384e-11	6.76384e-11	6.76384e-11	1.66453e-09	1.66453e-09	1.66453e-09	1.66453e-09	2.70093e-11	2.70093e-11	2.70093e-11	2.70093e-11	6.76384e-11	6.76384e-11	6.76384e-11	6.76384e-11	1.66453e-09	1.66453e-09	1.66453e-09	1.66453e-09	2.70093e-11	2.70093e-11	2.70093e-11	2.70093e-11	6.76384e-11	6.76384e-11	6.76384e-11	6.76384e-11	1.66453e-09	1.66453e-09	1.66453e-09	1.66453e-09	2.70093e-11	2.70093e-11	2.70093e-11	2.70093e-11	6.76384e-11	6.76384e-11	6.76384e-11	6.76384e-11	1.66453e-09	1.66453e-09	1.66453e-09	1.66453e-09	2.70093e-11	2.70093e-11	2.70093e-11	2.70093e-11
	incidence	1	1	1	1	1	1	1	1	1	1	1	1	1	1	1	1	1	1	1	1	1	1	1	1	1	1	1	1	1	1	1	1	1	1	1	1	1	1	1	1	1	1	1	1	1	1	1	1
	loglik	9.49319e-05	9.49319e-05	9.49319e-05	9.49319e-05	-3.00552e-06	-3.00552e-06	-3.00552e-06	-3.00552e-06	0.000309595	0.000309595	0.000309595	0.000309595	9.49319e-05	9.49319e-05	9.49319e-05	9.49319e-05	-3.00552e-06	-3.00552e-06	-3.00552e-06	-3.00552e-06	0.000309595	0.000309595	0.000309595	0.000309595	9.49319e-05	9.49319e-05	9.49319e-05	9.49319e-05	-3.00552e-06	-3.00552e-06	-3.00552e-06	-3.00552e-06	0.000309595	0.000309595	0.000309595	0.000309595	9.49319e-05	9.49319e-05	9.49319e-05	9.49319e-05	-3.00552e-06	-3.00552e-06	-3.00552e-06	-3.00552e-06	0.000309595	0.000309595	0.000309595	0.000309595
Lpa	inters	24.3457	28.657	27.583	27.4135	25.1638	27.0441	32.7904	33.1023	21.2389	22.1198	24.8354	21.9981	39.0168	56.4787	63.1963	72.8596	49.1607	57.1319	77.0938	93.279	36.5824	57.0345	62.8397	71.197	52.6284	75.7152	71.9002	73.4617	56.7589	65.8363	134.847	243.468	49.5165	132.024	143.987	137.381	38.9662	45.6062	46.1952	45.4447	31.3842	32.9286	37.4528	42.6546	31.851	36.8767	38.7209	43.0095
	incidence	0.977708	0.97089	0.975223	0.979546	0.974	0.972349	0.969631	0.974343	0.977672	0.981034	0.978797	0.987291	0.952402	0.931571	0.92452	0.928128	0.938473	0.937493	0.916598	0.922569	0.948042	0.937103	0.932561	0.929247	0.957224	0.947788	0.960371	0.95753	0.944314	0.935518	0.885638	0.885668	0.941388	0.895605	0.896729	0.909548	0.977912	0.971047	0.974279	0.97583	0.972786	0.971541	0.974823	0.972173	0.961263	0.957295	0.957219	0.956513
	loglik	-325.779	-320.681	-332.251	-336.892	-349.359	-358.068	-296.921	-285	-320.823	-317.651	-310.797	-318.651	-382.293	-338.109	-331.14	-273.695	-419.908	-390.563	-352.926	-264.626	-438.475	-327.793	-335.555	-312.267	-406.326	-331.01	-346.256	-388.526	-618.289	-691.871	-613.269	-379.155	-591.908	-368.351	-385.499	-414.72	-282.392	-268.74	-274.13	-291.941	-335.173	-355.239	-310.389	-278.579	-371.872	-355.614	-356.672	-330.063
Hic	inters	5.12095	5.99675	6.41814	6.34141	5.06348	5.95318	6.57759	7.68718	5.60066	5.98882	5.68186	5.96359	6.33484	7.80017	8.91246	10.2609	7.07835	8.99506	10.0541	11.9933	7.51179	8.63664	9.65913	10.3951	7.60765	10.807	13.3154	18.3467	8.47024	11.7146	15.8197	20.6296	8.29568	10.811	13.7314	17.8576	7.18155	8.8088	10.7853	13.0182	7.6536	9.87518	11.6944	13.2638	7.20646	8.65095	10.3685	10.2402
	incidence	1.01224	1.01085	1.01232	1.01544	1.00926	1.0075	1.00603	1.00753	1.00642	1.00729	1.01067	1.01257	1.00615	1.00335	1.00308	1.00229	1.00036	0.99465	0.990985	0.991983	0.997768	0.99568	0.993541	0.995126	0.99912	0.992399	0.988044	0.986403	0.993444	0.984258	0.977126	0.978818	0.991569	0.986235	0.984009	0.985361	1.00101	0.997547	0.995002	0.994096	0.996142	0.989375	0.98668	0.989772	0.996332	0.992554	0.991559	0.997027
	loglik	-342.151	-348.379	-367.584	-371.903	-342.417	-351.271	-376.697	-370.973	-315.625	-319.395	-348.202	-370.501	-331.389	-330.181	-339.969	-337.489	-337.421	-345.292	-391.947	-369.116	-317.405	-337.668	-356.012	-363.091	-409.578	-426.156	-487.997	-460.872	-403.197	-441.111	-458.91	-420.06	-439.842	-467.367	-475.705	-457.866	-349.077	-380.38	-400.206	-408.266	-345.183	-374.825	-375.859	-371.319	-394.49	-444.459	-471.64	-561.251
Gge	inters	7.89234	6.95354	7.33028	8.94956	7.56558	6.94519	6.26741	6.96514	7.23924	6.93798	5.96533	6.37108	8.09831	7.27226	7.66921	9.61165	7.50904	6.9446	6.22686	6.87232	7.3245	7.04698	6.4724	6.5177	7.33449	6.73391	7.38584	9.97731	7.03241	6.52903	6.23897	6.39004	7.03672	6.98291	6.38625	6.27061	8.01587	7.54139	8.54458	11.6333	6.83772	6.75377	6.43281	6.90802	6.18731	6.04629	5.89328	6.19041
	incidence	1.01698	1.02781	1.02757	1.02168	1.01569	1.02449	1.03406	1.03164	1.01001	1.01959	1.03596	1.03528	1.01426	1.02396	1.02377	1.01648	1.01495	1.02328	1.03311	1.031	1.00727	1.01604	1.02798	1.03416	1.01161	1.01854	1.01938	1.00931	1.01262	1.01929	1.02603	1.0286	1.00596	1.01245	1.02334	1.02906	1.00489	1.01035	1.00655	0.995587	1.01067	1.01474	1.02214	1.02123	1.00778	1.01418	1.02303	1.02576
	loglik	-241.969	-244.338	-285.363	-338.887	-259.843	-252.831	-264.73	-317.509	-311.248	-279.335	-261.311	-285.582	-240.036	-252.399	-295.286	-344.308	-251.004	-245.177	-257.623	-307.554	-312.695	-288.359	-277.584	-263.146	-273.452	-309.78	-343.403	-381.671	-260.119	-273.585	-287.815	-333.009	-308.125	-288.099	-289.895	-292.688	-277.88	-327.754	-401.421	-444.297	-267.357	-284.522	-304.123	-363.604	-309.616	-297.341	-294.65	-298.942
Rru	inters	3.78781	4.68866	5.74697	6.31753	3.66803	5.17933	5.45745	5.47341	3.55465	3.99782	4.49589	5.09615	3.72579	4.83173	5.85085	6.46813	3.6793	5.03205	5.10499	5.58248	3.66806	4.03204	4.651	5.41288	4.21334	5.20375	6.19813	6.36247	3.84541	5.21264	5.49483	5.94501	3.68136	4.25334	5.20295	5.86863	4.34512	5.84649	7.83316	8.5035	4.18649	5.7159	6.25469	6.3378	3.77955	4.27168	4.93396	5.67222
	incidence	1.05365	1.05473	1.05421	1.05528	1.05171	1.05351	1.05476	1.0571	1.05181	1.05614	1.06038	1.05893	1.05612	1.05515	1.05476	1.05579	1.05634	1.05555	1.05792	1.05751	1.05049	1.05617	1.05948	1.05794	1.05125	1.05033	1.05035	1.0534	1.05357	1.05344	1.05467	1.05524	1.05349	1.05401	1.05634	1.05568	1.04577	1.04234	1.03848	1.03764	1.04772	1.04753	1.04778	1.05017	1.05143	1.05306	1.05585	1.05512
	loglik	-324.994	-280.27	-224.586	-216.584	-371.914	-275.931	-293.799	-304.002	-363.873	-334.599	-300.633	-319.508	-318.866	-272.441	-217.439	-212.005	-344.157	-274.136	-300.196	-303.583	-386.149	-351.144	-324.843	-331.528	-311.583	-285.475	-239.39	-248.376	-350.256	-282.145	-297.83	-288.871	-372.091	-357.259	-308.288	-314.501	-369.057	-340.966	-286.391	-340.771	-363.378	-291.31	-290.616	-296.137	-362.993	-337.108	-304.266	-295.765
Cib	inters	8.90703	10.1323	11.9169	14.026	8.5813	9.24272	9.52059	12.3768	8.49413	9.10181	9.47865	11.5565	9.79679	11.0328	11.5436	13.0774	9.04692	9.34833	10.4129	13.0457	9.12862	9.83017	9.68544	11.5416	10.3864	10.5641	12.5721	15.7401	9.29506	9.72552	10.7547	13.943	8.86002	9.88374	11.0983	14.228	11.6395	12.0956	13.4958	19.0323	9.57477	10.6115	11.4501	14.5024	8.38705	9.43448	10.5187	13.8112
	incidence	0.80077	0.910315	0.993098	0.942996	1.02451	1.11747	1.5245	1.38643	0.891236	0.992417	0.973119	0.920448	0.854743	1.31707	4.39187	4.3292	1.1732	1.40774	1.33409	1.23905	1.1125	1.13362	1.88277	2.41304	0.790186	1.67657	1.3754	0.895905	1.11543	1.25328	1.09011	0.973931	0.914222	0.934288	0.848363	0.837348	0.676562	1.2412	1.03376	0.54291	1.18361	1.21101	1.12761	1.10105	0.940703	0.998827	0.922781	0.840863
	loglik	-460.069	-465.115	-452.117	-461.604	-389.398	-425.582	-446.007	-426.002	-398.36	-445.432	-510.519	-515.74	-426.131	-419.681	-386.916	-394.793	-383.012	-413.664	-421.812	-404.513	-381.728	-419.866	-455.904	-446.042	-428.995	-484.952	-497.131	-505.089	-361.906	-394.047	-426.932	-381.946	-379.48	-398.262	-413.618	-386.839	-437.377	-496.763	-533.178	-487.913	-361.037	-383.565	-424.534	-395.562	-385.951	-405.619	-412.345	-369.729
Cpy	inters	26.8562	33.7617	34.1773	38.5089	23.6496	27.4469	33.996	31.0909	20.9593	22.6475	28.4151	29.8288	15.6498	19.4642	20.1386	21.337	14.3706	17.356	19.2106	19.8892	15.6417	16.4971	21.4118	21.921	13.9506	18.0959	22.2296	26.7664	12.8962	14.5612	19.1328	23.467	12.7351	14.4311	19.3356	21.7975	12.3381	17.3578	22.3357	25.7542	11.2399	12.532	19.3847	23.7268	10.3138	11.1825	14.8582	18.7679
	incidence	0.985641	0.976545	0.975597	0.976867	0.986319	0.98156	0.97601	0.980787	0.979508	0.984852	0.987634	0.990917	1.00203	0.99916	0.999494	0.998195	0.999617	0.995114	0.992588	0.997424	0.982621	0.988633	0.98726	0.987008	1.01057	1.009	1.00781	1.0065	1.00407	1.00417	0.996023	0.995427	0.994973	0.995615	0.991547	0.990359	1.01055	1.00386	0.998367	0.995172	1.00056	1.00273	0.993637	0.992842	0.997809	0.997785	0.991415	0.985528
	loglik	-270.758	-265.331	-320.997	-285.88	-298.957	-323.565	-290.197	-347.593	-362.273	-365.518	-304.354	-286.398	-287.807	-236.211	-253.615	-269.491	-317.406	-306.788	-310.275	-316.614	-402.883	-396.252	-318.907	-329.12	-353.675	-341.507	-333.596	-351.299	-393.331	-451.823	-482.476	-506.456	-425.803	-465.814	-471.347	-518.399	-417.207	-421.986	-410.74	-417.662	-489.655	-548.244	-505.026	-506.274	-439.982	-509.896	-534.604	-568.255
Oam	inters	6.09495	6.52383	7.01777	8.83008	5.75948	6.07397	8.30477	11.153	4.30491	4.40038	4.70569	5.49033	7.72123	9.01988	10.8591	13.7973	6.85613	7.53878	10.5715	14.1818	5.44293	5.88869	5.90319	6.41292	6.43983	7.58337	9.11464	13.6102	5.90173	6.84044	9.38738	12.4817	6.07994	6.92767	7.07397	7.96322	7.98814	9.71451	11.8208	13.2738	6.55676	8.26343	11.608	14.742	6.1111	7.50699	7.50435	8.64369
	incidence	0.993364	0.991229	0.992332	0.989787	0.994137	0.995092	0.992679	0.988822	1.00626	1.0106	1.01396	1.01611	0.987036	0.978044	0.970153	0.958808	0.991606	0.992321	0.995246	0.987525	1.01179	1.02181	1.02678	1.03071	0.980909	0.972938	0.968246	0.955457	0.988493	0.991259	0.991568	0.986422	1.00567	1.0138	1.01855	1.02097	0.92905	0.91058	0.907915	0.887403	0.989303	0.989651	0.983353	0.980863	0.99841	1.00553	1.00666	1.00774
	loglik	-300.702	-332.461	-341.153	-322.528	-348.487	-402.692	-367.946	-330.051	-388.614	-391.84	-379.615	-354.654	-315.204	-326.587	-325.418	-342.85	-365.443	-429.846	-373.076	-355.038	-358.973	-304.953	-294.669	-247.329	-350.054	-371.435	-384.001	-338.039	-397.098	-429.621	-375.974	-362.582	-340.533	-285.154	-283.712	-261.46	-382.857	-389.443	-380.833	-413.343	-409.522	-453.122	-450.375	-467.699	-339.174	-287.707	-353.91	-398.227
		V1	V2	V3	V4	V5	V6	V7	V8	V9	V10	V11	V12	V17	V18	V19	V20	V21	V22	V23	V24	V25	V26	V27	V28	V33	V34	V35	V36	V37	V38	V39	V40	V41	V42	V43	V44	V49	V50	V51	V52	V53	V54	V55	V56	V57	V58	V59	V60
		4.62462e-61	3.92135e-60	1.98417e-63	1.01416e-66	2.06334e-60	1.96953e-65	6.16049e-68	3.38438e-69	1.68078e-61	4.49522e-64	1.17655e-68	3.21941e-69	6.02034e-43	6.49355e-46	3.39632e-51	1.86299e-54	1.14179e-46	3.69368e-53	1.9482e-56	5.06348e-61	2.82896e-44	2.53588e-45	2.71399e-53	6.49581e-59	3.17353e-32	4.74577e-37	9.07207e-40	1.60754e-41	1.06814e-33	5.37445e-38	1.02114e-43	3.73314e-46	2.99376e-23	1.1836e-24	4.81009e-29	8.50631e-37	2.36843e-35	1.02501e-40	2.72302e-42	1.11637e-44	8.50687e-34	2.14223e-39	1.69396e-44	4.37068e-45	5.92142e-19	2.67847e-23	1.12471e-26	1.378e-33
		1.09645e-13	2.20864e-13	1.88596e-14	1.73892e-15	2.23089e-12	5.44856e-14	9.05073e-15	3.72424e-15	1.43529e-13	2.13278e-14	8.08743e-16	5.46222e-16	7.22966e-08	6.21048e-09	8.25661e-11	6.08805e-12	6.333e-08	3.68566e-10	1.55389e-11	4.72843e-13	7.83917e-09	3.26017e-09	1.43983e-11	3.29681e-13	0.000608896	1.49935e-05	1.68815e-06	4.05248e-07	0.000796268	3.3225e-05	6.58368e-07	5.33454e-08	0.0486896	0.0266068	0.0019502	6.97184e-06	3.65882e-05	7.81572e-07	1.20283e-07	1.66707e-08	0.000194951	6.57933e-06	1.11269e-07	6.9188e-08	0.121023	0.0231318	0.00327188	8.19186e-06
		NA	NA	NA	NA	NA	NA	NA	NA	NA	NA	NA	NA	NA	NA	NA	NA	NA	NA	NA	NA	NA	NA	NA	NA	NA	NA	NA	NA	NA	NA	NA	NA	NA	NA	NA	NA	NA	NA	NA	NA	NA	NA	NA	NA	NA	NA	NA	NA
		3.07003e-08	1.04824e-16	6.50355e-31	5.74601e-52	2.84013e-09	1.11405e-16	8.45463e-32	3.26534e-54	2.11812e-05	8.95977e-13	1.92036e-26	4.53809e-51	1.18678e-11	4.96049e-22	2.83775e-42	9.67849e-71	1.21633e-11	1.65164e-21	1.38652e-41	3.72092e-69	3.87089e-07	3.82952e-16	1.464e-37	3.59594e-71	9.46139e-16	2.93141e-27	2.99693e-58	1.40218e-90	2.15167e-15	1.83987e-26	4.19891e-56	1.62561e-89	5.66009e-09	2.61182e-19	9.50479e-48	2.84813e-88	1.47838e-16	6.1487e-28	1.09869e-60	2.471e-96	1.83667e-17	1.09547e-28	1.32218e-63	1.12953e-98	1.08887e-09	3.23709e-20	4.32166e-52	4.15158e-93
		0.0138731	0.063738	0.0152569	0.00281828	0.0707165	0.5857	0.165976	0.270498	0.0420001	0.423859	0.592171	0.120212	0.000250821	0.00129474	1.94457e-05	1.2042e-06	0.00373879	0.053928	0.00114334	0.0018113	0.00363557	0.0647946	0.0145918	0.00117286	4.02305e-07	6.44945e-06	1.50312e-09	8.76681e-11	2.01652e-05	0.00119174	4.5439e-07	1.15689e-05	0.000172017	0.00523295	0.000168554	1.91243e-06	1.24532e-07	1.94128e-06	2.39295e-10	2.60965e-12	7.55662e-07	0.000122488	1.14223e-09	2.34032e-08	5.15261e-05	0.00162711	6.44782e-06	8.48808e-08
		NA	NA	NA	NA	NA	NA	NA	NA	NA	NA	NA	NA	NA	NA	NA	NA	NA	NA	NA	NA	NA	NA	NA	NA	NA	NA	NA	NA	NA	NA	NA	NA	NA	NA	NA	NA	NA	NA	NA	NA	NA	NA	NA	NA	NA	NA	NA	NA
		0.990723	0.990723	0.990723	0.990723	0.997745	0.997745	0.997745	0.997745	0.996494	0.996494	0.996494	0.996494	0.990723	0.990723	0.990723	0.990723	0.997745	0.997745	0.997745	0.997745	0.996494	0.996494	0.996494	0.996494	0.990723	0.990723	0.990723	0.990723	0.997745	0.997745	0.997745	0.997745	0.996494	0.996494	0.996494	0.996494	0.990723	0.990723	0.990723	0.990723	0.997745	0.997745	0.997745	0.997745	0.996494	0.996494	0.996494	0.996494
		1	1	1	1	1	1	1	1	1	1	1	1	1	1	1	1	1	1	1	1	1	1	1	1	1	1	1	1	1	1	1	1	1	1	1	1	1	1	1	1	1	1	1	1	1	1	1	1
		NA	NA	NA	NA	NA	NA	NA	NA	NA	NA	NA	NA	NA	NA	NA	NA	NA	NA	NA	NA	NA	NA	NA	NA	NA	NA	NA	NA	NA	NA	NA	NA	NA	NA	NA	NA	NA	NA	NA	NA	NA	NA	NA	NA	NA	NA	NA	NA
		0.999707	0.999707	0.999707	0.999707	0.997344	0.997344	0.997344	0.997344	0.995678	0.995678	0.995678	0.995678	0.999707	0.999707	0.999707	0.999707	0.997344	0.997344	0.997344	0.997344	0.995678	0.995678	0.995678	0.995678	0.999707	0.999707	0.999707	0.999707	0.997344	0.997344	0.997344	0.997344	0.995678	0.995678	0.995678	0.995678	0.999707	0.999707	0.999707	0.999707	0.997344	0.997344	0.997344	0.997344	0.995678	0.995678	0.995678	0.995678
		1	1	1	1	1	1	1	1	1	1	1	1	1	1	1	1	1	1	1	1	1	1	1	1	1	1	1	1	1	1	1	1	1	1	1	1	1	1	1	1	1	1	1	1	1	1	1	1
		NA	NA	NA	NA	NA	NA	NA	NA	NA	NA	NA	NA	NA	NA	NA	NA	NA	NA	NA	NA	NA	NA	NA	NA	NA	NA	NA	NA	NA	NA	NA	NA	NA	NA	NA	NA	NA	NA	NA	NA	NA	NA	NA	NA	NA	NA	NA	NA
		8.54253e-80	5.99748e-78	2.25816e-79	1.63868e-79	9.75374e-05	5.26663e-05	1.85029e-05	8.01041e-06	0.998908	0.998908	0.998908	0.998908	3.7511e-75	4.29254e-72	3.81682e-74	4.1576e-75	0.000117243	6.30794e-05	3.28743e-05	9.61845e-06	0.998908	0.998908	0.998908	0.998908	1.60041e-67	1.07861e-64	1.15762e-66	2.53257e-68	4.91048e-05	5.61835e-05	2.91835e-05	8.50157e-06	0.998908	0.998908	0.998908	0.998908	2.415e-68	2.10502e-66	3.5119e-64	3.03275e-66	1.89974e-05	2.17912e-05	1.09561e-05	4.68286e-06	0.998908	0.998908	0.998908	0.998908
		0.8385	0.881622	0.304664	0.577774	0.0200597	0.0209916	0.0190896	0.017423	1	1	1	1	0.984745	0.650201	0.548796	0.701068	0.0323634	0.033697	0.0315379	0.0275765	1	1	1	1	0.453853	0.234138	0.959287	0.878928	0.0366033	0.0415154	0.038881	0.0340645	1	1	1	1	0.227191	0.10917	0.0960181	0.0922201	0.0400479	0.0452996	0.0424287	0.0388906	1	1	1	1
		NA	NA	NA	NA	NA	NA	NA	NA	NA	NA	NA	NA	NA	NA	NA	NA	NA	NA	NA	NA	NA	NA	NA	NA	NA	NA	NA	NA	NA	NA	NA	NA	NA	NA	NA	NA	NA	NA	NA	NA	NA	NA	NA	NA	NA	NA	NA	NA
		0.999444	4.75153e-16	6.80695e-18	4.6635e-13	0.998666	2.14414e-06	3.72054e-15	1.19338e-06	0.995937	0.995937	3.66702e-19	8.90722e-17	0.999444	1.45418e-15	5.58201e-18	1.37698e-12	0.998666	2.14414e-06	1.02386e-15	1.64435e-07	0.995937	0.995937	1.19685e-19	3.28124e-16	0.999444	5.36067e-15	2.09184e-18	1.05921e-12	0.998666	2.14414e-06	2.30055e-16	3.73657e-08	0.995937	0.995937	4.49971e-20	3.01444e-15	0.999444	2.47745e-14	7.77211e-19	4.62962e-13	0.998666	9.18073e-06	4.52551e-17	4.09537e-08	0.995937	0.995937	2.49847e-20	1.25016e-14
		1	0.585987	0.456756	0.0072858	1	0.849654	0.1186	0.0139105	1	1	0.315206	6.01288e-09	1	0.639826	0.450983	0.0347373	1	0.849654	0.195275	0.0576248	1	1	0.101523	3.5121e-07	1	0.701276	0.673563	0.0389578	1	0.849654	0.361078	0.190468	1	1	0.0255609	2.21959e-05	1	0.772395	0.930942	0.0520587	1	0.683826	0.698235	0.389042	1	1	0.0113477	0.000347361
		NA	NA	NA	NA	NA	NA	NA	NA	NA	NA	NA	NA	NA	NA	NA	NA	NA	NA	NA	NA	NA	NA	NA	NA	NA	NA	NA	NA	NA	NA	NA	NA	NA	NA	NA	NA	NA	NA	NA	NA	NA	NA	NA	NA	NA	NA	NA	NA
		0.993239	0.993239	0.993239	0.993239	0.996809	0.996809	0.996809	0.996809	0.993239	0.993239	0.993239	0.993239	0.993239	0.993239	0.993239	0.993239	0.996809	0.996809	0.996809	0.996809	0.993239	0.993239	0.993239	0.993239	0.993239	0.993239	0.993239	0.993239	0.996809	0.996809	0.996809	0.996809	0.993239	0.993239	0.993239	0.993239	0.993239	0.993239	0.993239	0.993239	0.996809	0.996809	0.996809	0.996809	0.993239	0.993239	0.993239	0.993239
		1	1	1	1	1	1	1	1	1	1	1	1	1	1	1	1	1	1	1	1	1	1	1	1	1	1	1	1	1	1	1	1	1	1	1	1	1	1	1	1	1	1	1	1	1	1	1	1
		NA	NA	NA	NA	NA	NA	NA	NA	NA	NA	NA	NA	NA	NA	NA	NA	NA	NA	NA	NA	NA	NA	NA	NA	NA	NA	NA	NA	NA	NA	NA	NA	NA	NA	NA	NA	NA	NA	NA	NA	NA	NA	NA	NA	NA	NA	NA	NA
		0.376572	3.93529e-05	9.05954e-17	5.86101e-46	0.592456	2.19897e-05	2.84886e-15	4.73287e-41	3.39607e-05	6.98014e-13	1.63693e-32	2.10303e-71	0.280161	4.54365e-05	6.09296e-16	5.96063e-46	0.478218	1.19506e-05	5.81717e-16	1.19373e-41	3.22606e-05	2.5723e-12	1.44645e-32	1.19928e-74	0.483548	0.000563056	7.60454e-13	2.00591e-41	0.759123	0.000151213	1.46007e-13	3.30378e-36	0.00024002	5.56197e-11	8.78277e-29	1.11871e-68	0.990865	0.00253842	2.99241e-11	1.09242e-34	0.644951	0.00293342	4.39672e-10	2.90731e-30	0.00438962	4.2456e-09	4.38875e-24	1.05153e-59
		3.04114e-45	9.47755e-39	1.13253e-28	6.99895e-14	9.03796e-47	8.74615e-38	5.12111e-30	3.2528e-15	2.14119e-29	3.72096e-25	2.42286e-18	3.19104e-06	6.41619e-33	2.45035e-28	4.47399e-20	1.32244e-07	5.53083e-36	3.37086e-27	7.32651e-20	2.52088e-08	6.09413e-22	4.33632e-18	1.01964e-10	0.0120797	1.23039e-34	1.64415e-29	1.03753e-21	3.08383e-08	1.12321e-35	3.26011e-28	5.70111e-21	1.31335e-09	1.71504e-23	7.71804e-18	1.39894e-11	0.00963076	1.86598e-37	4.17176e-31	4.46485e-23	1.76469e-10	2.78677e-38	4.43975e-31	4.55052e-24	1.60038e-11	8.47915e-26	2.0329e-19	1.29471e-13	0.000942029
		NA	NA	NA	NA	NA	NA	NA	NA	NA	NA	NA	NA	NA	NA	NA	NA	NA	NA	NA	NA	NA	NA	NA	NA	NA	NA	NA	NA	NA	NA	NA	NA	NA	NA	NA	NA	NA	NA	NA	NA	NA	NA	NA	NA	NA	NA	NA	NA
		0.993695	0.993695	0.993695	0.993695	0.993097	0.993097	0.993097	0.993097	0.997656	0.997656	0.997656	0.997656	0.993695	0.993695	0.993695	0.993695	0.993097	0.993097	0.993097	0.993097	0.997656	0.997656	0.997656	0.997656	0.993695	0.993695	0.993695	0.993695	0.993097	0.993097	0.993097	0.993097	0.997656	0.997656	0.997656	0.997656	0.993695	0.993695	0.993695	0.993695	0.993097	0.993097	0.993097	0.993097	0.997656	0.997656	0.997656	0.997656
		1	1	1	1	1	1	1	1	1	1	1	1	1	1	1	1	1	1	1	1	1	1	1	1	1	1	1	1	1	1	1	1	1	1	1	1	1	1	1	1	1	1	1	1	1	1	1	1
		NA	NA	NA	NA	NA	NA	NA	NA	NA	NA	NA	NA	NA	NA	NA	NA	NA	NA	NA	NA	NA	NA	NA	NA	NA	NA	NA	NA	NA	NA	NA	NA	NA	NA	NA	NA	NA	NA	NA	NA	NA	NA	NA	NA	NA	NA	NA	NA
		0.000322751	1.2919e-18	6.436e-39	2.51206e-51	0.000413624	2.76207e-11	3.96772e-33	3.46508e-65	7.02386e-07	6.18796e-25	3.8512e-43	1.3236e-68	0.000159439	4.30534e-20	6.32937e-43	3.48096e-62	0.000227031	1.34105e-12	3.66796e-37	3.71501e-76	1.76734e-07	1.00047e-26	2.00744e-47	4.4214e-79	0.000100799	1.02359e-20	7.94647e-46	4.12805e-69	0.000130181	2.08292e-13	3.24996e-39	2.45952e-80	5.97503e-08	9.23586e-28	5.65285e-49	6.29839e-83	5.97224e-05	1.65405e-21	4.04022e-48	6.96656e-70	8.95085e-05	1.01828e-13	7.10447e-41	9.63467e-80	6.89613e-08	4.50672e-28	4.21066e-50	1.52035e-86
		0.868502	0.890103	0.000859954	7.0008e-11	0.645205	0.817813	0.44411	0.00372174	0.900953	0.982174	0.195433	0.000168371	0.873674	0.634063	0.0229945	1.10778e-06	0.472733	0.785261	0.835636	0.112857	0.571603	0.537388	0.563859	0.00554565	0.71954	0.47064	0.172667	0.000255728	0.345116	0.496707	0.440728	0.473722	0.374296	0.346484	0.822695	0.0427674	0.563474	0.30715	0.495454	0.00148484	0.275734	0.406756	0.22969	0.563403	0.397036	0.299925	0.978847	0.135534
		NA	NA	NA	NA	NA	NA	NA	NA	NA	NA	NA	NA	NA	NA	NA	NA	NA	NA	NA	NA	NA	NA	NA	NA	NA	NA	NA	NA	NA	NA	NA	NA	NA	NA	NA	NA	NA	NA	NA	NA	NA	NA	NA	NA	NA	NA	NA	NA
		0.998826	0.998826	0.998826	0.998826	0.997211	0.997211	0.997211	0.997211	0.999153	0.999153	0.999153	0.999153	0.998826	0.998826	0.998826	0.998826	0.997211	0.997211	0.997211	0.997211	0.999153	0.999153	0.999153	0.999153	0.998826	0.998826	0.998826	0.998826	0.997211	0.997211	0.997211	0.997211	0.999153	0.999153	0.999153	0.999153	0.998826	0.998826	0.998826	0.998826	0.997211	0.997211	0.997211	0.997211	0.999153	0.999153	0.999153	0.999153
		1	1	1	1	1	1	1	1	1	1	1	1	1	1	1	1	1	1	1	1	1	1	1	1	1	1	1	1	1	1	1	1	1	1	1	1	1	1	1	1	1	1	1	1	1	1	1	1
		NA	NA	NA	NA	NA	NA	NA	NA	NA	NA	NA	NA	NA	NA	NA	NA	NA	NA	NA	NA	NA	NA	NA	NA	NA	NA	NA	NA	NA	NA	NA	NA	NA	NA	NA	NA	NA	NA	NA	NA	NA	NA	NA	NA	NA	NA	NA	NA
		2.3144e-06	3.12838e-16	2.58125e-26	2.66003e-53	2.06131e-06	6.20026e-16	5.0168e-25	1.78429e-57	3.7753e-06	4.14509e-16	3.2342e-23	1.30342e-44	6.0567e-07	2.28236e-18	5.4252e-29	4.20156e-57	2.07229e-07	3.4267e-18	4.2021e-28	1.36231e-62	2.12423e-06	3.0843e-17	2.79888e-26	6.21004e-48	6.27083e-09	1.32219e-19	8.28046e-32	4.0977e-60	5.8296e-10	7.82864e-21	7.9268e-32	1.37167e-67	7.15345e-09	5.38594e-20	4.67423e-30	5.89565e-54	4.70827e-11	1.6839e-23	5.16111e-38	1.75065e-68	1.2639e-12	2.97511e-25	2.43137e-38	6.43925e-78	3.04302e-11	1.12656e-24	6.41614e-38	1.62805e-64
		2.02629e-05	0.00136207	0.0190823	0.97748	1.13968e-05	0.00285157	0.0103219	0.416351	4.97058e-06	0.00153024	0.00156021	0.230212	9.30977e-05	0.0134639	0.108132	0.453217	0.000115821	0.0206538	0.0618019	0.130124	1.62908e-05	0.00822203	0.0289804	0.625927	0.00602872	0.066551	0.343961	0.28443	0.0119393	0.168554	0.371629	0.0315103	0.00223702	0.0776441	0.160911	0.733157	0.0664344	0.406977	0.693597	0.0185503	0.14055	0.860382	0.654218	0.000267662	0.0656491	0.633515	0.917466	0.0855193
		NA	NA	NA	NA	NA	NA	NA	NA	NA	NA	NA	NA	NA	NA	NA	NA	NA	NA	NA	NA	NA	NA	NA	NA	NA	NA	NA	NA	NA	NA	NA	NA	NA	NA	NA	NA	NA	NA	NA	NA	NA	NA	NA	NA	NA	NA	NA	NA
		NA	NA	NA	NA	NA	NA	NA	NA	NA	NA	NA	NA	NA	NA	NA	NA	NA	NA	NA	NA	NA	NA	NA	NA	NA	NA	NA	NA	NA	NA	NA	NA	NA	NA	NA	NA	NA	NA	NA	NA	NA	NA	NA	NA	NA	NA	NA	NA
		NA	NA	NA	NA	NA	NA	NA	NA	NA	NA	NA	NA	NA	NA	NA	NA	NA	NA	NA	NA	NA	NA	NA	NA	NA	NA	NA	NA	NA	NA	NA	NA	NA	NA	NA	NA	NA	NA	NA	NA	NA	NA	NA	NA	NA	NA	NA	NA
		NA	NA	NA	NA	NA	NA	NA	NA	NA	NA	NA	NA	NA	NA	NA	NA	NA	NA	NA	NA	NA	NA	NA	NA	NA	NA	NA	NA	NA	NA	NA	NA	NA	NA	NA	NA	NA	NA	NA	NA	NA	NA	NA	NA	NA	NA	NA	NA
		4.35017e-215	4.11771e-241	1.06827e-278	0	3.88466e-177	3.33965e-261	1.23911e-298	0	1.10924e-97	7.39765e-137	1.33163e-215	9.36295e-273	3.12587e-183	9.90667e-203	7.91412e-241	3.98376e-301	6.9473e-153	1.59397e-228	1.23972e-273	5.13023e-299	1.40832e-88	4.14035e-124	1.3867e-193	5.32352e-241	6.37709e-157	1.05831e-182	2.24279e-226	5.68867e-272	4.28081e-147	3.27455e-209	2.03679e-243	9.6815e-263	1.1194e-87	1.96517e-123	5.23935e-184	2.89273e-237	8.21144e-137	6.6504e-172	1.77425e-227	7.56229e-298	1.3594e-134	5.20472e-180	3.76789e-204	5.57373e-222	6.73456e-85	2.98827e-120	1.36151e-179	3.93757e-224
		0.94148	0.921258	0.475011	0.105682	2.83197e-05	6.09942e-09	6.42687e-11	8.09076e-10	0.000142794	3.75576e-05	4.7972e-06	6.64065e-06	0.572721	0.695026	0.948403	0.501994	0.000197075	9.19129e-08	4.89775e-10	8.15769e-09	0.000242552	7.8522e-05	1.70058e-05	2.0317e-05	0.791839	0.456771	0.119392	0.0366357	0.000213772	7.99884e-07	2.27203e-09	4.85224e-08	6.81916e-05	1.738e-05	1.54856e-05	7.97512e-06	0.147206	0.0258679	0.000271423	2.73126e-06	0.000302625	5.90052e-06	8.35592e-08	5.47128e-07	1.85421e-05	4.21456e-06	4.59763e-06	1.16812e-05
		NA	NA	NA	NA	NA	NA	NA	NA	NA	NA	NA	NA	NA	NA	NA	NA	NA	NA	NA	NA	NA	NA	NA	NA	NA	NA	NA	NA	NA	NA	NA	NA	NA	NA	NA	NA	NA	NA	NA	NA	NA	NA	NA	NA	NA	NA	NA	NA
		NA	NA	NA	NA	0	0	0	0	0	0	0	NA	NA	NA	NA	NA	0	0	0	0	0	NA	NA	NA	NA	NA	NA	NA	NA	NA	NA	NA	NA	NA	NA	NA	NA	NA	NA	NA	NA	NA	NA	NA	NA	NA	NA	NA
		NA	NA	NA	NA	0.0533289	0.0345294	0.0287983	0.0203704	0.0402573	0.978342	0.978001	NA	NA	NA	NA	NA	0.0305961	0.0297432	0.0201382	0.974697	0.977191	NA	NA	NA	NA	NA	NA	NA	NA	NA	NA	NA	NA	NA	NA	NA	NA	NA	NA	NA	NA	NA	NA	NA	NA	NA	NA	NA
		NA	NA	NA	NA	NA	NA	NA	NA	NA	NA	NA	NA	NA	NA	NA	NA	NA	NA	NA	NA	NA	NA	NA	NA	NA	NA	NA	NA	NA	NA	NA	NA	NA	NA	NA	NA	NA	NA	NA	NA	NA	NA	NA	NA	NA	NA	NA	NA
		0.988397	1.59668e-21	1.53996e-15	1.41859e-05	0.996934	0.996934	1.41519e-21	3.38892e-13	0.983014	0.983014	3.03742e-19	6.14834e-19	0.988397	9.88058e-22	2.79197e-15	1.1657e-05	0.996934	0.996934	1.93324e-21	5.35427e-13	0.983014	0.983014	9.12722e-19	9.80353e-19	0.988397	6.59702e-22	1.26167e-15	7.75457e-06	0.996934	0.996934	1.93324e-21	2.10445e-14	0.983014	0.983014	9.12722e-19	6.36386e-19	0.988397	4.71747e-22	2.36639e-15	5.17331e-06	0.996934	0.996934	2.04762e-21	2.15726e-14	0.983014	0.983014	9.12722e-19	2.73986e-19
		1	0.855514	0.388816	0.778659	1	1	0.653327	0.840804	1	1	0.542231	0.937656	1	0.84138	0.929719	0.609739	1	1	0.823676	0.818681	1	1	0.56049	0.780367	1	0.85215	0.666601	0.811788	1	1	0.823676	0.667834	1	1	0.560489	0.753699	1	0.84436	0.290908	0.967559	1	1	0.795627	0.983401	1	1	0.560488	0.699539
		NA	NA	NA	NA	NA	NA	NA	NA	NA	NA	NA	NA	NA	NA	NA	NA	NA	NA	NA	NA	NA	NA	NA	NA	NA	NA	NA	NA	NA	NA	NA	NA	NA	NA	NA	NA	NA	NA	NA	NA	NA	NA	NA	NA	NA	NA	NA	NA
		3.09816e-227	6.64702e-284	0	0	0	0	0	0	2.30949e-108	4.51348e-144	8.37343e-207	3.3338e-285	6.69375e-216	2.90407e-278	0	0	0	0	0	0	2.32922e-116	1.36233e-152	3.68603e-202	1.14898e-275	1.73992e-223	3.53395e-284	0	0	0	0	0	0	5.04388e-110	1.91299e-147	3.51469e-209	2.06594e-276	1.6156e-203	3.71997e-240	2.25796e-285	0	0	0	0	0	1.17387e-98	6.83997e-136	1.4873e-192	7.51912e-252
		0.00112891	1.42919e-06	1.91766e-12	1.06852e-15	5.86251e-07	1.83761e-12	7.19438e-14	7.1672e-11	0.761503	0.608202	0.000113721	4.2161e-10	5.1751e-08	7.77394e-14	1.68658e-19	1.5589e-28	4.22249e-16	1.34478e-20	5.44016e-24	5.63315e-25	0.000475572	1.96035e-05	4.75692e-10	3.14456e-19	1.73284e-06	3.58844e-15	2.876e-23	3.80247e-27	7.03898e-16	8.68582e-19	2.09047e-18	1.89262e-23	0.000299924	4.21099e-05	4.19928e-09	8.52208e-16	4.43462e-05	3.98925e-10	9.31868e-14	1.98069e-20	1.98946e-13	3.38332e-13	1.84412e-12	3.02807e-13	0.00395013	0.000522146	1.99593e-07	1.63808e-13
		NA	NA	NA	NA	NA	NA	NA	NA	NA	NA	NA	NA	NA	NA	NA	NA	NA	NA	NA	NA	NA	NA	NA	NA	NA	NA	NA	NA	NA	NA	NA	NA	NA	NA	NA	NA	NA	NA	NA	NA	NA	NA	NA	NA	NA	NA	NA	NA
		0.990295	0.990295	0.990295	0.990295	0.997345	0.997345	0.997345	0.997345	0.9943	0.9943	0.9943	0.9943	0.990295	0.990295	0.990295	0.990295	0.997345	0.997345	0.997345	0.997345	0.9943	0.9943	0.9943	0.9943	0.990295	0.990295	0.990295	0.990295	0.997345	0.997345	0.997345	0.997345	0.9943	0.9943	0.9943	0.9943	0.990295	0.990295	0.990295	0.990295	0.997345	0.997345	0.997345	0.997345	0.9943	0.9943	0.9943	0.9943
		1	1	1	1	1	1	1	1	1	1	1	1	1	1	1	1	1	1	1	1	1	1	1	1	1	1	1	1	1	1	1	1	1	1	1	1	1	1	1	1	1	1	1	1	1	1	1	1
		NA	NA	NA	NA	NA	NA	NA	NA	NA	NA	NA	NA	NA	NA	NA	NA	NA	NA	NA	NA	NA	NA	NA	NA	NA	NA	NA	NA	NA	NA	NA	NA	NA	NA	NA	NA	NA	NA	NA	NA	NA	NA	NA	NA	NA	NA	NA	NA
		0.984922	0.984922	0.984922	0.984922	0.989199	0.989199	0.9914	0.9914	0.982974	0.982974	0.997758	0.997758	0.984922	0.984922	0.984922	0.984922	0.989199	0.989199	0.9914	0.9914	0.982974	0.982974	0.997758	0.997758	0.984922	0.984922	0.984922	0.984922	0.989199	0.989199	0.9914	0.9914	0.982974	0.982974	0.997758	0.997758	0.984922	0.984922	0.984922	0.984922	0.989199	0.989199	0.9914	0.9914	0.982974	0.982974	0.997758	0.997758
		1	1	1	1	1	1	1	1	1	1	1	1	1	1	1	1	1	1	1	1	1	1	1	1	1	1	1	1	1	1	1	1	1	1	1	1	1	1	1	1	1	1	1	1	1	1	1	1
		NA	NA	NA	NA	NA	NA	NA	NA	NA	NA	NA	NA	NA	NA	NA	NA	NA	NA	NA	NA	NA	NA	NA	NA	NA	NA	NA	NA	NA	NA	NA	NA	NA	NA	NA	NA	NA	NA	NA	NA	NA	NA	NA	NA	NA	NA	NA	NA
		NA	NA	NA	NA	NA	NA	NA	NA	NA	NA	NA	NA	NA	NA	NA	NA	NA	NA	NA	NA	NA	NA	NA	NA	NA	NA	NA	NA	NA	NA	NA	NA	NA	NA	NA	NA	NA	NA	NA	NA	NA	NA	NA	NA	NA	NA	NA	NA
		NA	NA	NA	NA	NA	NA	NA	NA	NA	NA	NA	NA	NA	NA	NA	NA	NA	NA	NA	NA	NA	NA	NA	NA	NA	NA	NA	NA	NA	NA	NA	NA	NA	NA	NA	NA	NA	NA	NA	NA	NA	NA	NA	NA	NA	NA	NA	NA
		NA	NA	NA	NA	NA	NA	NA	NA	NA	NA	NA	NA	NA	NA	NA	NA	NA	NA	NA	NA	NA	NA	NA	NA	NA	NA	NA	NA	NA	NA	NA	NA	NA	NA	NA	NA	NA	NA	NA	NA	NA	NA	NA	NA	NA	NA	NA	NA
		4.09815e-07	5.1648e-14	6.91102e-24	4.85803e-47	0.0014788	3.04548e-11	2.67181e-19	2.92812e-44	0.000325111	2.84191e-12	3.35417e-20	2.6698e-43	2.93196e-07	9.38019e-16	1.24922e-26	7.59561e-52	0.00118976	3.56597e-12	7.77366e-22	3.36034e-50	0.000253771	1.37813e-12	5.0588e-22	1.27208e-48	2.96686e-07	8.95934e-16	1.13987e-25	7.43186e-51	0.00125651	3.61453e-12	2.17613e-21	9.84194e-49	0.000256182	1.39613e-12	2.79961e-22	6.73241e-48	3.22591e-07	1.23208e-15	1.9171e-23	2.09987e-47	0.000956115	5.52297e-12	1.17996e-20	3.75838e-47	0.000187145	1.4812e-12	6.86349e-21	2.7525e-44
		1.12707e-07	2.84197e-07	3.03856e-07	3.07361e-07	6.23806e-07	4.23607e-07	5.78755e-07	1.10991e-07	4.14064e-07	4.70264e-07	6.33292e-07	7.56608e-07	9.3443e-08	8.07749e-08	9.32656e-08	5.11633e-08	5.29182e-07	2.28676e-07	1.63282e-07	1.46253e-08	3.48814e-07	3.5682e-07	2.25287e-07	7.99507e-08	9.40565e-08	7.93799e-08	1.26801e-07	5.6272e-08	5.5132e-07	2.29957e-07	1.6332e-07	1.40903e-08	3.5073e-07	3.58589e-07	1.85919e-07	7.68386e-08	9.85299e-08	8.96129e-08	3.00089e-07	1.59036e-07	4.50056e-07	2.74039e-07	2.8499e-07	3.30015e-08	2.82037e-07	3.66762e-07	3.77062e-07	4.16442e-07
		NA	NA	NA	NA	NA	NA	NA	NA	NA	NA	NA	NA	NA	NA	NA	NA	NA	NA	NA	NA	NA	NA	NA	NA	NA	NA	NA	NA	NA	NA	NA	NA	NA	NA	NA	NA	NA	NA	NA	NA	NA	NA	NA	NA	NA	NA	NA	NA
		2.20115e-14	2.96197e-23	2.03117e-29	2.3116e-46	1.35621e-14	8.45467e-26	1.19244e-33	3.15835e-43	6.23252e-23	1.31846e-34	2.27833e-43	4.39215e-43	7.6167e-19	1.04581e-28	3.56334e-38	2.97906e-61	6.57564e-19	2.92996e-27	3.17053e-37	1.14599e-54	3.99839e-28	4.35518e-39	2.57628e-52	2.2962e-58	1.45124e-39	1.22795e-83	2.62463e-126	7.06054e-202	5.49903e-34	3.35447e-62	2.28461e-78	4.00248e-120	6.61679e-34	2.61432e-45	5.67661e-70	5.77546e-78	1.04233e-72	9.25594e-157	2.25351e-271	0	5.43689e-65	1.63946e-116	2.98479e-150	1.93929e-249	1.41566e-42	2.397e-62	1.67256e-91	2.37028e-115
		0.000340021	0.768277	1.00244e-08	1.76567e-19	0.316646	0.938603	0.592996	6.09108e-05	0.590596	0.41423	0.00865231	5.39189e-05	5.26018e-06	0.0618367	2.84829e-05	3.28733e-15	0.0227186	0.478683	0.543516	0.0192489	0.0986394	0.723951	0.572955	0.211393	1.0169e-12	6.48788e-12	0.00107299	0.897045	7.43506e-06	2.63129e-05	1.38626e-05	0.0107444	0.00695883	0.101553	0.0852132	0.513617	7.09261e-16	1.33617e-17	1.00452e-12	1.55623e-06	6.59805e-12	2.72199e-12	1.22981e-11	5.91715e-11	0.000147431	0.00166789	0.000518681	0.00257457
		NA	NA	NA	NA	NA	NA	NA	NA	NA	NA	NA	NA	NA	NA	NA	NA	NA	NA	NA	NA	NA	NA	NA	NA	NA	NA	NA	NA	NA	NA	NA	NA	NA	NA	NA	NA	NA	NA	NA	NA	NA	NA	NA	NA	NA	NA	NA	NA
		0.997941	0.997941	0.997941	0.997941	0.991298	0.991298	0.991298	0.991298	0.998302	0.998302	0.998302	0.998302	0.997941	0.997941	0.997941	0.997941	0.991298	0.991298	0.991298	0.991298	0.998302	0.998302	0.998302	0.998302	0.997941	0.997941	0.997941	0.997941	0.991298	0.991298	0.991298	0.991298	0.998302	0.998302	0.998302	0.998302	0.997941	0.997941	0.997941	0.997941	0.991298	0.991298	0.991298	0.991298	0.998302	0.998302	0.998302	0.998302
		1	1	1	1	1	1	1	1	1	1	1	1	1	1	1	1	1	1	1	1	1	1	1	1	1	1	1	1	1	1	1	1	1	1	1	1	1	1	1	1	1	1	1	1	1	1	1	1
		NA	NA	NA	NA	NA	NA	NA	NA	NA	NA	NA	NA	NA	NA	NA	NA	NA	NA	NA	NA	NA	NA	NA	NA	NA	NA	NA	NA	NA	NA	NA	NA	NA	NA	NA	NA	NA	NA	NA	NA	NA	NA	NA	NA	NA	NA	NA	NA
		0	0	0	0	0	0	0	0	0	0	0	0	0	0	0	0	0	0	0	0	0	0	0	0	0	0	0	0	0	0	0	0	0	0	0	0	0	0	0	0	0	0	0	0	0	0	0	0
		3.83384e-16	1.73506e-23	5.677e-17	7.30326e-13	1.21974e-19	1.64881e-21	2.73448e-25	3.45718e-18	6.09928e-16	1.8317e-12	1.70188e-15	1.37051e-05	2.21081e-35	7.26607e-48	1.76475e-51	2.53155e-51	9.73606e-49	6.96321e-41	2.33453e-36	1.02143e-41	5.03483e-41	3.03959e-50	1.71094e-53	1.62435e-59	5.0196e-31	2.12313e-28	8.20812e-13	7.51214e-14	4.04928e-44	2.23176e-40	2.71995e-35	2.12305e-41	5.20373e-42	3.42836e-57	2.08223e-42	3.90885e-28	1.96011e-10	1.25258e-15	3.94238e-13	4.6965e-12	1.51542e-22	3.81422e-24	2.20634e-18	2.82441e-24	1.00979e-31	2.68266e-30	8.27976e-30	2.48791e-33
		NA	NA	NA	NA	NA	NA	NA	NA	NA	NA	NA	NA	NA	NA	NA	NA	NA	NA	NA	NA	NA	NA	NA	NA	NA	NA	NA	NA	NA	NA	NA	NA	NA	NA	NA	NA	NA	NA	NA	NA	NA	NA	NA	NA	NA	NA	NA	NA
		1.84218e-105	2.5657e-123	9.07689e-131	1.5786e-123	9.96643e-105	1.85916e-125	1.92726e-143	2.3068e-170	6.07617e-122	3.39201e-127	1.43083e-114	4.0832e-119	1.7813e-146	2.14211e-184	1.28706e-217	4.09468e-247	9.63958e-171	1.26377e-216	4.65614e-247	0	6.45267e-183	6.18502e-211	4.02311e-237	3.28131e-251	2.51523e-190	2.84566e-275	0	0	1.13803e-219	4.73922e-295	0	0	1.37689e-215	8.05653e-283	0	0	1.61169e-176	3.06495e-226	4.53402e-273	0	9.67924e-196	8.1349e-246	1.64438e-297	0	2.68399e-183	8.26971e-217	1.23987e-264	9.00823e-272
		4.46798e-09	1.27653e-07	4.82384e-10	6.05411e-16	2.26007e-05	0.000527685	0.00527777	0.000168418	0.00374316	0.000735824	4.41876e-07	5.38505e-10	0.00518016	0.121986	0.142367	0.267025	0.878025	0.025134	0.000270256	0.000521081	0.348978	0.067824	0.00751109	0.0350253	0.707411	0.00122372	7.73087e-07	8.22168e-09	0.00779594	2.12974e-09	1.44212e-16	6.23642e-17	0.00096237	9.50546e-08	2.73608e-10	2.6832e-09	0.663895	0.283575	0.0290534	0.0081357	0.112791	3.11402e-05	2.06324e-07	2.0511e-05	0.136872	0.00313492	0.000619785	0.206543
		NA	NA	NA	NA	NA	NA	NA	NA	NA	NA	NA	NA	NA	NA	NA	NA	NA	NA	NA	NA	NA	NA	NA	NA	NA	NA	NA	NA	NA	NA	NA	NA	NA	NA	NA	NA	NA	NA	NA	NA	NA	NA	NA	NA	NA	NA	NA	NA
		5.02261e-177	2.32921e-142	1.33546e-142	4.24005e-161	1.36354e-179	4.52379e-152	3.81011e-116	3.7607e-121	3.30355e-168	5.97904e-162	2.38326e-110	3.90674e-108	4.19201e-183	3.55538e-152	2.17871e-152	1.93435e-177	7.59293e-177	1.68394e-151	1.8066e-114	3.99669e-118	3.91449e-171	1.32925e-165	2.59888e-128	3.06296e-112	8.62574e-174	9.39262e-148	8.35658e-158	1.65548e-202	2.11303e-167	6.1926e-143	7.18876e-117	4.09695e-113	1.57969e-165	6.78141e-165	1.44347e-130	4.35778e-109	1.96818e-199	2.05724e-177	1.1245e-194	6.68001e-253	4.13686e-169	6.52369e-159	1.10986e-134	2.70707e-134	4.85644e-151	5.70623e-148	3.74228e-127	4.75803e-119
		1.13639e-07	1.01296e-16	2.53795e-16	3.43026e-10	2.03103e-07	2.02023e-15	4.08008e-24	2.92074e-20	0.000910866	3.63632e-11	5.18976e-27	7.23612e-25	1.18911e-05	1.83963e-12	3.27019e-12	2.62614e-06	9.91132e-07	9.60415e-14	2.32918e-22	4.75701e-19	0.0154888	5.01403e-08	3.84625e-18	1.92993e-23	0.000526567	1.23838e-07	2.52645e-08	0.00895292	6.28543e-05	3.06641e-09	1.61849e-13	1.01211e-15	0.050707	3.74834e-05	1.00918e-12	1.32458e-16	0.156488	0.00399438	0.0705552	0.240867	0.000917555	8.35924e-06	2.04306e-10	2.09878e-09	0.0111564	3.44891e-06	2.82628e-12	2.04783e-13
		NA	NA	NA	NA	NA	NA	NA	NA	NA	NA	NA	NA	NA	NA	NA	NA	NA	NA	NA	NA	NA	NA	NA	NA	NA	NA	NA	NA	NA	NA	NA	NA	NA	NA	NA	NA	NA	NA	NA	NA	NA	NA	NA	NA	NA	NA	NA	NA
		9.55634e-87	3.17309e-110	7.03768e-133	1.05629e-127	3.12029e-77	8.43877e-124	6.85577e-121	9.67095e-111	2.69615e-74	4.99297e-86	4.2412e-94	1.28113e-101	2.31678e-82	3.75087e-111	5.97506e-131	3.08851e-125	1.60739e-76	6.26359e-115	6.8478e-107	4.49704e-109	1.16363e-78	2.8228e-86	6.46945e-99	2.04873e-105	2.15317e-106	1.27835e-129	1.12395e-151	2.3738e-136	2.54117e-87	8.9539e-130	2.48065e-127	3.68535e-128	1.0064e-80	4.56876e-95	3.42083e-120	6.7238e-125	9.14905e-120	7.28783e-167	4.39586e-220	8.17573e-224	6.05629e-105	2.12334e-156	1.85173e-159	5.95844e-149	2.71094e-88	1.36268e-99	3.4799e-116	3.13602e-126
		1.13829e-77	1.19276e-90	1.44467e-95	2.22066e-97	3.65509e-71	1.73303e-88	6.28209e-93	2.68598e-100	6.19691e-71	3.85459e-88	2.7236e-114	1.03967e-106	6.04681e-88	4.04793e-93	1.14535e-97	1.12241e-98	2.38544e-84	6.2733e-96	1.50815e-104	3.60162e-101	6.34651e-67	3.67812e-88	2.13324e-111	1.05482e-101	5.01775e-74	4.53657e-75	3.39669e-81	6.27824e-91	2.21165e-76	9.83332e-91	1.14309e-95	1.88932e-98	1.15187e-73	2.62725e-81	3.01007e-103	2.13008e-99	3.84226e-55	7.94319e-51	6.36967e-45	1.29331e-42	1.20971e-57	5.04199e-69	2.35626e-70	1.68034e-78	7.63336e-68	1.03586e-78	1.77917e-98	3.60569e-97
		NA	NA	NA	NA	NA	NA	NA	NA	NA	NA	NA	NA	NA	NA	NA	NA	NA	NA	NA	NA	NA	NA	NA	NA	NA	NA	NA	NA	NA	NA	NA	NA	NA	NA	NA	NA	NA	NA	NA	NA	NA	NA	NA	NA	NA	NA	NA	NA
		0	0	0	0	0	0	0	0	0	0	0	0	0	0	0	0	0	0	0	0	0	0	0	0	0	0	0	0	0	0	0	0	0	0	0	0	0	0	0	0	0	0	0	0	0	0	0	0
		0.0518345	0.401591	0.945871	0.557089	0.792107	0.18486	6.46318e-06	0.000292268	0.262677	0.934352	0.768172	0.355516	0.248758	0.0729672	1.62419e-18	1.19185e-19	0.152686	0.000685166	0.00401864	0.0264261	0.358138	0.259245	4.02728e-06	2.37225e-11	0.16126	0.0305195	0.176861	0.654142	0.341722	0.0377357	0.455661	0.81399	0.506806	0.593448	0.203541	0.153107	0.0371524	0.434364	0.90593	0.0433254	0.120792	0.0743843	0.273072	0.342161	0.652507	0.992446	0.520085	0.167492
		NA	NA	NA	NA	NA	NA	NA	NA	NA	NA	NA	NA	NA	NA	NA	NA	NA	NA	NA	NA	NA	NA	NA	NA	NA	NA	NA	NA	NA	NA	NA	NA	NA	NA	NA	NA	NA	NA	NA	NA	NA	NA	NA	NA	NA	NA	NA	NA
		0	0	0	0	0	0	0	0	0	0	0	0	0	0	0	0	0	0	0	0	0	0	0	0	0	0	0	0	0	0	0	0	0	0	0	0	0	0	0	0	0	0	0	0	4.56996e-283	0	0	0
		3.06137e-05	7.20245e-10	2.47333e-10	1.78969e-09	5.76694e-05	2.98309e-07	3.95284e-10	1.89911e-07	1.32246e-11	5.41503e-07	0.00025809	0.00365457	0.461713	0.761884	0.855619	0.519351	0.894382	0.0996759	0.0152845	0.386981	4.17896e-11	2.61387e-05	1.83871e-06	6.49295e-06	1.14024e-05	0.000100076	0.000437633	0.00197339	0.0743985	0.083158	0.128312	0.0685368	0.019622	0.0429376	0.000138752	9.25519e-06	1.13668e-05	0.120373	0.53198	0.0661723	0.811715	0.273743	0.0127779	0.00290766	0.291381	0.271261	4.21519e-05	3.18208e-11
		NA	NA	NA	NA	NA	NA	NA	NA	NA	NA	NA	NA	NA	NA	NA	NA	NA	NA	NA	NA	NA	NA	NA	NA	NA	NA	NA	NA	NA	NA	NA	NA	NA	NA	NA	NA	NA	NA	NA	NA	NA	NA	NA	NA	NA	NA	NA	NA
		1.99718e-203	2.55131e-217	6.91975e-231	6.95619e-280	1.95e-178	6.91354e-186	2.6893e-240	1.63131e-292	1.48832e-108	1.4251e-103	2.38628e-101	1.89901e-109	0	0	0	0	1.10092e-262	2.27458e-295	0	0	2.97855e-175	3.27874e-184	2.37542e-169	5.07567e-168	3.62146e-293	0	0	0	1.4353e-236	3.84346e-290	0	0	2.69573e-226	1.18483e-256	6.34829e-249	1.28249e-264	0	0	0	0	0	0	0	0	2.30561e-255	0	0	0
		0.000879375	7.70265e-06	5.46593e-05	3.22865e-07	0.00445426	0.0206768	0.000771689	1.66328e-06	0.000179343	2.02468e-11	1.91579e-19	1.63056e-25	6.67442e-05	6.39935e-10	4.40867e-12	3.06902e-14	0.00105263	0.00549981	0.102017	3.78826e-05	4.66518e-08	2.31212e-27	6.92536e-46	4.86998e-66	8.33538e-07	6.534e-09	9.40846e-09	3.23043e-12	4.62052e-05	0.00312429	0.00763932	2.37914e-05	0.0132494	1.27294e-10	5.88998e-21	2.85825e-29	1.28275e-08	3.61977e-06	1.87265e-05	0.000600624	0.00294596	0.0149257	0.000235976	0.000423854	0.557103	0.0367519	0.00737119	0.00118159
		NA	NA	NA	NA	NA	NA	NA	NA	NA	NA	NA	NA	NA	NA	NA	NA	NA	NA	NA	NA	NA	NA	NA	NA	NA	NA	NA	NA	NA	NA	NA	NA	NA	NA	NA	NA	NA	NA	NA	NA	NA	NA	NA	NA	NA	NA	NA	NA
Aal	inters	3.24236	3.21538	3.31127	3.40734	3.19589	3.34031	3.41271	3.44922	3.25242	3.32733	3.46132	3.47781	2.71827	2.80438	2.95743	3.05198	2.79907	2.98274	3.08351	3.21521	2.76418	2.79475	3.02606	3.1871	2.40113	2.54286	2.62181	2.67245	2.43297	2.55674	2.7155	2.78864	2.13054	2.17627	2.30784	2.53956	2.49375	2.64921	2.70083	2.76981	2.44471	2.6023	2.74769	2.76439	2.00144	2.14449	2.24556	2.46033
	incidence	0.973593	0.974218	0.971983	0.969707	0.976137	0.972818	0.971124	0.970262	0.973643	0.971893	0.968709	0.968312	0.98433	0.982428	0.978975	0.976795	0.984331	0.980292	0.977516	0.97445	0.982471	0.981779	0.977441	0.973981	0.991439	0.988497	0.986826	0.985742	0.991713	0.989178	0.986125	0.984271	0.995442	0.994824	0.992411	0.987936	0.989133	0.986241	0.98481	0.983305	0.990536	0.987926	0.984839	0.984479		0.994652	0.992906	0.988121
	loglik
Gpy	inters	1.56232	1.88928	2.30957	2.84916	1.60662	1.88989	2.33355	2.88466	1.42708	1.74516	2.20409	2.88042	1.69992	2.05207	2.58393	3.24995	1.70018	2.03618	2.57513	3.21234	1.51639	1.86031	2.48484	3.3226	1.84253	2.19467	2.91318	3.60323	1.83133	2.17283	2.8838	3.57476	1.60066	1.96081	2.71259	3.67008	1.86859	2.21463	2.9618	3.70898	1.89937	2.23352	3.03934	3.75571	1.63128	1.98802	2.80446	3.76218
	incidence	0.99001		0.99082	0.989089					0.992036				0.98416	0.987181	0.982499	0.980881	0.988207		0.987318	0.988612	0.987984		0.990984	0.988232	0.975734	0.980691	0.973004	0.972214	0.981126	0.986806	0.978766	0.983136	0.983565	0.989201	0.985486	0.981775	0.974243	0.97929	0.971147	0.968948	0.976991	0.983859	0.972684	0.976852	0.981916	0.98752	0.981858	0.978762
	loglik
Lti	inters
	incidence
	loglik
Sci	inters
	incidence
	loglik
Pvo	inters	3.04572	3.01223	3.0183	3.02275	1.35299	1.36565	1.38787	1.40411					2.97462	2.92258	2.93643	2.95503	1.34753	1.3604	1.37484	1.39905					2.85056	2.80106	2.81438	2.84285	1.36526	1.36212	1.37653	1.40063					2.87604	2.84713	2.81553	2.85285	1.38376	1.38071	1.39514	1.41112
	incidence					0.871137	0.87482	0.873014	0.870758									0.891961	0.894796	0.893383	0.890206									0.898507	0.903112	0.90172	0.898647									0.903457	0.907779	0.906408	0.904426
	loglik
Cfi	inters		0.0487376	0.212183	0.413659		0.00434082	0.271886	0.552398			0.102166	0.27768		0.0428151	0.206698	0.42331		0.00434082	0.268067	0.527628			0.0980072	0.287087		0.0369255	0.21006	0.419311		0.00434082	0.2672	0.51284			0.0944684	0.308024		0.0310842	0.208851	0.406885		0.00718517	0.269458	0.522529			0.0947162	0.320258
	incidence				1.06373				0.870141				1.05792				1.05326								1.05257				1.05261							1.04384	1.04533											1.04781	1.03968
	loglik
Ccr	inters
	incidence
	loglik
Mca	inters		1.52955	2.29099	3.75575		1.56745	2.21238	3.59159	1.48567	1.95697	2.8316	4.31875		1.526	2.23812	3.70426		1.59294	2.26104	3.63458	1.48691	1.92622	2.82476	4.36638		1.4417	2.08411	3.5282		1.50634	2.13046	3.36927	1.42725	1.86532	2.69439	4.19558		1.383	1.9944	3.22336		1.38785	1.92001	3.07671	1.32513	1.76146	2.4876	3.84516
	incidence	1.02221	1.01953	1.01604	1.01038	1.02279	1.01955	1.01643	1.01104	1.01689	1.01497	1.01189	1.00621	1.01851	1.01629	1.013	1.00714	1.01957	1.01625	1.01302	1.00772	1.01419	1.01232	1.00864	1.00327	1.01916	1.01691	1.01382	1.00759	1.01973	1.01671	1.01351	1.00844	1.01481	1.01233	1.00914	1.0034	1.02025	1.0175	1.01441	1.00882	1.0208	1.01777	1.01476	1.00949	1.01574	1.01302	1.01007	1.00437
	loglik
Mav	inters
	incidence
	loglik
Dni	inters	1.34468	1.87537	2.32161	2.72553	1.34781	1.65543	2.23357	2.88649	1.48093	2.04843	2.45329	3.00877	1.36291	1.91793	2.40995	2.94268	1.36406	1.70302	2.32732	3.10804	1.50866	2.09502	2.53575	3.19758	1.37444	1.93566	2.47317	3.06878	1.3787	1.73124	2.37392	3.19086	1.52981	2.1216	2.56685	3.25304	1.3873	1.95798	2.52363	3.0658	1.38834	1.74194	2.41143	3.17599	1.52704	2.12956	2.58936	3.31251
	incidence			1.00985	1.02396				1.00817				1.01363			1.00717	1.01852								1.01034				1.0144								1.00776				1.01277
	loglik
Sbe	inters
	incidence
	loglik
Hcr	inters	1.65073	2.26474	2.81875	4.31987	1.65019	2.25181	2.73052	4.61745	1.63336	2.26646	2.64265	3.76913	1.69185	2.3727	2.94745	4.50347	1.71864	2.36619	2.86959	4.85154	1.64924	2.31874	2.77598	3.9218	1.82145	2.41432	3.02078	4.48731	1.87688	2.47002	2.98953	4.90656	1.81471	2.44375	2.91673	4.11748	1.94418	2.58374	3.25683	4.74042	2.02194	2.66331	3.24442	5.22184	1.94665	2.63813	3.20766	4.45556
	incidence	1.00825	1.00586	1.00425		1.00843	1.00551	1.0046		1.00877	1.00582	1.00566		1.00754	1.0045			1.00738	1.00427			1.00825	1.00483	1.00388		1.00532				1.00483			0.996101	1.00587							0.995779				0.993404
	loglik
Cau	inters
	incidence
	loglik
Clu	inters	5.2147	5.88058	6.80042	8.67433	4.8389	6.36014	7.09764	7.77527	3.46834	4.17534	5.58067	6.5597	4.69108	5.16714	5.99229	7.42961	4.363	5.65961	6.47073	7.0016	3.28711	3.92302	5.17226	5.99691	4.38434	4.94683	5.85655	7.01845	4.29687	5.41109	6.10203	6.48627	3.2963	3.94404	5.03578	5.92651	4.27071	5.04324	6.54127	8.89819	4.13699	5.00011	5.54543	5.91634	3.28062	3.93164	4.96843	5.71502
	incidence					0.89622	0.816823	0.717407	0.708507	0.906029	0.901162	0.883128	0.868714					0.908502	0.828525	0.713277	0.719128	0.907371	0.903216	0.888185	0.870243				0.952708	0.907799	0.852771	0.728847	0.742004	0.890892	0.88472	0.8832	0.856268		0.92668	0.832886	0.782167	0.90805	0.867629	0.780347	0.772097	0.871369	0.864412	0.864313	0.856041
	loglik
Ala	inters					9.70529	10.8998	11.8928	13.44	10.4997	11.4847	11.8437						11.6399	11.7599	13.5	15.7895	12.7692
	incidence						0.215619	0.102111	0.0888738	0.117623								0.104633	0.103421	0.0884255
	loglik
Uar	inters		0.0940471	0.351459	0.651802			0.134097	0.414443			0.0678522	0.264353		0.0998301	0.363079	0.648432			0.146874	0.420508			0.0617423	0.278218		0.105603	0.353848	0.640486			0.146874	0.378222			0.0617423	0.272385		0.111365	0.364344	0.632658			0.158805	0.377838			0.0617423	0.260705
	incidence
	loglik
Mlu	inters	6.56852	7.91848	9.06342	10.9426	9.20189	11.4606	12.5107	12.6483	4.17368	4.95285	6.33139	8.07562	6.25304	7.74428	9.17477	12.806	9.58791	11.8919	13.1464	14.3544	4.40448	5.18934	6.29427	7.86636	6.35438	7.97756	10.1723	13.1915	9.75123	11.6206	12.4125	15.2118	4.25793	5.04789	6.3961	7.80587	5.90503	6.67018	7.43165	9.6903	8.24786	8.98135	9.79009	11.2966	3.97681	4.77355	5.99742	7.21749
	incidence	0.993234	0.989608	0.98267	0.979792	0.988348	0.982347	0.981108	0.984636			0.993234	0.988235	0.987483	0.98122	0.972818	0.963978	0.980238	0.974976	0.972993	0.973879	0.993755	0.99222	0.987726	0.980019	0.988498	0.977549	0.96397	0.959159	0.979554	0.9756	0.976535	0.974854	0.993275	0.992232	0.988195	0.981483	0.990242	0.983333	0.975891	0.966551	0.981969	0.980794	0.98167	0.98223	0.994685	0.993427	0.98965	0.983093
	loglik
Mpu	inters
	incidence
	loglik
Mma	inters
	incidence
	loglik
Ggu	inters
	incidence
	loglik
Llu	inters	1.45553	1.67891	1.91921	2.35865	1.28659	1.59993	1.81502	2.32653	1.32608	1.6299	1.83798	2.30119	1.46176	1.7315	1.98569	2.4495	1.29263	1.63171	1.88248	2.4425	1.33234	1.64055	1.88651	2.40663	1.46154	1.73208	1.96296	2.43092	1.29112	1.63151	1.87124	2.41392	1.3321	1.64036	1.89326	2.39257	1.45999	1.72801	1.90873	2.36594	1.29861	1.62521	1.85162	2.38365	1.3399	1.63949	1.85696	2.32161
	incidence	0.651979	0.721258	0.750852	0.760062	0.667592	0.719041	0.756185	0.756341	0.660932	0.724093	0.760777	0.781603	0.643814	0.679847	0.718855	0.718283	0.659117	0.699518	0.72136	0.712608	0.652396	0.712512	0.730319	0.730599	0.644103	0.679193	0.725055	0.717285	0.661243	0.699738	0.717244	0.703483	0.652765	0.71272	0.723964	0.726277	0.646145	0.683733	0.746269	0.739135	0.650621	0.706625	0.73609	0.727502	0.64193	0.713669	0.743529	0.766533
	loglik
Fsi	inters	2.24051	2.6958	2.98776	3.66832	2.19538	2.6695	2.97225	3.30765	2.54741	3.10428	3.35931	3.42014	2.43867	2.87214	3.2727	4.10231	2.39336	2.66833	3.02722	3.60057	2.7467	3.20994	3.62016	3.9215	3.11661	4.38619	5.49826	7.13393	2.87583	3.67288	4.02894	4.90936	2.86766	3.2596	3.9065	4.17082	4.02994	6.12799	9.10288	13.2247	3.88876	5.15794	5.90558	8.21946	3.17494	3.83544	4.54515	5.30337
[truncated: 50 more rows]

## Sheet: 3.GRASSLAND
		Baseline												2020												2050												2080
[truncated: 296 more rows]

## Sheet: 4.FOREST
		Baseline												2020												2050												2080
[truncated: 296 more rows]

[truncated: 1 more sheets: 5.CROPS]
