# Supplementary material for: Spatial Adaptive Responses of Highly Threatened European Mammal Species under Climate Change
Source: Preprints.org preprint supplement (doi:10.20944/preprints202111.0550.v1), 2021-11-29
Supplement: Supplementary file 5 [file Tables S6.docx]

**Tables S7** - Regression scores (slopes, *βpers*, and its confidence intervals) between the summed persistence scores of Cs and CIs SATs crossing site I and the spatial attributes of site i: PA: protected area coverage; N2k, Natura2000 coverage; HII: human footprint index; Arab: arable land coverage; Crop: cropland coverage; For: forest coverage; Grass: grassland coverage; Urb: urban coverage. A slope significantly distinct from zero presents both extremes of confidence intervals negative (significant negative relationship) or positive (significant positive relationships. Tables refer to the 12 tested scenarios, varying RCP (RCP 8.5, RCP 6.0 and RCP 4.5) and dispersal assumptions (D1, D2, D3 and D4).
