# Supplementary material for: Spatial Adaptive Responses of Highly Threatened European Mammal Species under Climate Change
Source: Preprints.org preprint supplement (doi:10.20944/preprints202111.0550.v1), 2021-11-29
Supplement: Supplementary file 7 [file Tables S7.docx]

**Tables S8** – Wilcox signed ranks tests to verify about significant differences between the spatial attributes of non-converging points (=1) and converging points (>1) in baseline, 2020, 2050 and 2080. Spatial attributes refer to: PA: protected area coverage; N2k, Natura2000 coverage; HII: human footprint index; Arab: arable land coverage; Crop: cropland coverage; For: forest coverage; Grass: grassland coverage; Urb: urban coverage. The values represent strictly standardized mean differences with positive values indication larger attribute coverage for convergent points and negative values the opposite. Colors mark significant differences with dark green for P < 0.001; medium-level green to P < 0.01 and light green for P < 0.05. Values refer to the 12 tested scenarios, varying RCP (RCP 8.5, RCP 6.0 and RCP 4.5) and dispersal assumptions (D1, D2, D3 and D4).
