# Supplementary material for: Spatial Adaptive Responses of Highly Threatened European Mammal Species under Climate Change
Source: Preprints.org preprint supplement (doi:10.20944/preprints202111.0550.v1), 2021-11-29
Supplement: Supplementary file 9 [file Tables S8.docx]

**Tables S9** – Univariate zero-truncated Poisson models to obtain relationships between convergence levels of convergence points (=1) and spatial attributes of sites in baseline, 2020, 2050 and 2080. Spatial attributes refer to: PA: protected area coverage; N2k, Natura2000 coverage; HII: human footprint index; Arab: arable land coverage; Crop: cropland coverage; For: forest coverage; Grass: grassland coverage; Urb: urban coverage. The values represent the intersect, αconv, which informs on the average convergence level of a site with no coverage of spatial attribute, the average incidence ratio rate (IRR) and the log-likelihood of βconv (the slopes). Colors mark significant differences with dark green for P < 0.001; medium-level green to P < 0.01 and light green for P < 0.05. Values refer to the 12 tested scenarios, varying RCP (RCP 8.5, RCP 6.0 and RCP 4.5) and dispersal assumptions (D1, D2, D3 and D4).
